# Supplementary material for: Genetic Regulation of Enoyl-CoA Hydratase Domain-Containing 3 in Adipose Tissue Determines Insulin Sensitivity in African Americans and Europeans
Source: Oxford University Press journal article supplement (doi:10.2337/db18-1229), 2019-04-22
Supplement: db181229supplementarydata2.xlsx [file db181229supplementarydata2.xlsx]

## Sheet: S.Table-1
Supplementary Table-1: Expression levels of subcutaneous adipose tissue transcripts are correlated with Matsuda Insulin sensitivity index in AAGMEx
Transcripts of genes with Entrez gene id and correlated (q<0.01) with Matsuda index, based on regression analysis (adjusted for age, gender,and ancestry proportion/admixture) are shown.
Results in Column L-Q are based on secondary analysis adjusted for age, gender, BMI, and admixture.
					adjusted for age, gender and admixture						adjusted for age, gender,BMI and admixture
Probe Id	RefSeq_ID	Symbol	Entrez_Gene_ID	ReAnnotator_Gene_symbol	beta	se_beta	R2_full	adj_R2_full	pval	qval	beta*	se_beta*	R2_full*	adj_R2_full*	pval*	qval*	Definition	Synonyms	Notes
ILMN_1721035	NM_152851.1	MS4A6A	64231	MS4A6A	-1.05506	0.093222	0.375741	0.365379	4.26945e-24	2.0192e-19	-0.825694	0.10781	0.413324	0.401101	4.59669e-13	2.17396e-08	membrane-spanning 4-domains, subfamily A, member 6A (MS4A6A), transcript variant 3, mRNA.	CDA01; MSTP090; MGC22650; 4SPAN3; 4SPAN3.2; MS4A6; CD20L3; MST090; MGC131944
ILMN_2397721	NM_001079811.1	GLB1	2720	GLB1	-1.94369	0.173513	0.371299	0.360864	1.0098e-23	2.38788e-19	-1.51296	0.201235	0.409107	0.396797	1.10123e-12	2.33835e-08	galactosidase, beta 1 (GLB1), transcript variant 2, mRNA.	ELNR1; EBP
ILMN_1735155	NM_000404.1	GLB1	2720	GLB1	-2.1285	0.19317	0.364238	0.353686	3.9203e-23	4.63517e-19	-1.64241	0.219864	0.407664	0.395323	1.48329e-12	2.33835e-08	galactosidase, beta 1 (GLB1), transcript variant 179423, mRNA.
ILMN_2359800	NM_152851.1	MS4A6A	64231	MS4A6A	-0.997823	0.0920994	0.357082	0.346411	1.52729e-22	1.44463e-18	-0.762526	0.105615	0.400209	0.387714	6.83234e-12	8.07822e-08	membrane-spanning 4-domains, subfamily A, member 6A (MS4A6A), transcript variant 3, mRNA.	CDA01; MSTP090; MGC22650; 4SPAN3; 4SPAN3.2; MS4A6; CD20L3; MST090; MGC131944
ILMN_1796409	NM_000491.3	C1QB	713	C1QB	-0.935104	0.0872004	0.352777	0.342035	3.43625e-22	2.70857e-18	-0.709704	0.102654	0.391186	0.378503	4.2425e-11	2.15522e-07	complement component 1, q subcomponent, B chain (C1QB), mRNA.
ILMN_1722622	NM_203416.2	CD163	9332	CD163	-1.00643	0.0946535	0.349232	0.338431	6.67426e-22	4.50932e-18	-0.761201	0.107994	0.395147	0.382546	1.90897e-11	1.46302e-07	CD163 molecule (CD163), transcript variant 2, mRNA.	MM130; M130
ILMN_1805992	NM_018330.4	KIAA1598	57698	KIAA1598	-1.5051	0.143505	0.343566	0.332671	1.91421e-21	1.13163e-17	-1.12583	0.169479	0.383324	0.370476	2.04279e-10	5.70237e-07	KIAA1598 (KIAA1598), mRNA.	shootin1; shootin-1; MGC40476; DKFZp686A0439
ILMN_1745963	NM_000803.3	FOLR2	2350	FOLR2	-1.50145	0.145428	0.337128	0.326126	6.27123e-21	2.96592e-17	-1.12867	0.158422	0.397386	0.384831	1.21307e-11	1.14742e-07	folate receptor 2 (fetal) (FOLR2), mRNA.	FR-P3; FBP/PL-1; beta-hFR; FR-beta
ILMN_2379599	NM_203416.1	CD163	9332	CD163	-0.951887	0.0921564	0.337313	0.326314	6.06215e-21	2.96592e-17	-0.706775	0.105819	0.384369	0.371543	1.65947e-10	5.60591e-07	CD163 molecule (CD163), transcript variant 2, mRNA.	MM130; M130
ILMN_1792473	NM_032955.1	AIF1	199	AIF1	-1.18967	0.117179	0.330354	0.319239	2.15988e-20	7.85763e-17	-0.870487	0.137546	0.37435	0.361316	1.20271e-09	1.85037e-06	allograft inflammatory factor 1 (AIF1), transcript variant 1, mRNA.	AIF-1; IRT-1; IBA1
ILMN_1740015	NM_000591.2	CD14	929	CD14	-1.19543	0.118266	0.328592	0.317448	2.97328e-20	9.05655e-17	-0.883552	0.13091	0.386402	0.373618	1.10644e-10	4.75707e-07	CD14 molecule (CD14), transcript variant 1, mRNA.
ILMN_1757387	NM_004181.3	UCHL1	7345	UCHL1	-0.662587	0.0658997	0.326472	0.315293	4.36274e-20	1.14629e-16	-0.481001	0.0778485	0.37013	0.357008	2.74781e-09	2.88789e-06	ubiquitin carboxyl-terminal esterase L1 (ubiquitin thiolesterase) (UCHL1), mRNA.	PARK5; Uch-L1; PGP9.5
ILMN_1780533	NM_005615.4	RNASE6	6039	RNASE6	-2.41712	0.241181	0.325186	0.313986	5.50282e-20	1.30125e-16	-1.76712	0.272091	0.379067	0.366131	4.74962e-10	1.02104e-06	ribonuclease, RNase A family, k6 (RNASE6), mRNA.	RNS6; RNase k6; RNasek6
ILMN_3243924	NM_005446.3	P2RX6	9127	P2RX6	-1.23161	0.122827	0.325392	0.314195	5.30197e-20	1.30125e-16	-0.907529	0.135297	0.385196	0.372388	1.4072e-10	5.1194e-07	purinergic receptor P2X, ligand-gated ion channel, 6 (P2RX6), transcript variant 1, mRNA.	P2RX6; P2XM; MGC129625; P2X6
ILMN_1757210	NM_001031733.1	CALML4	91860	CALML4	-3.29884	0.330457	0.323627	0.312401	7.28669e-20	1.64103e-16	-2.38286	0.389316	0.368509	0.355353	3.76925e-09	3.79282e-06	calmodulin-like 4 (CALML4), transcript variant 1, mRNA.	NY-BR-20; MGC4809
ILMN_2396444	NM_001040021.1	CD14	929	CD14	-1.12285	0.113014	0.321754	0.310497	1.02008e-19	2.09754e-16	-0.820034	0.125699	0.379902	0.366983	4.02677e-10	9.06868e-07	CD14 molecule (CD14), transcript variant 2, mRNA.
ILMN_1669409	NM_007268.2	VSIG4	11326	VSIG4	-1.82066	0.183844	0.320477	0.309198	1.28252e-19	2.52731e-16	-1.32427	0.205702	0.377446	0.364476	6.54037e-10	1.34487e-06	V-set and immunoglobulin domain containing 4 (VSIG4), transcript variant 1, mRNA.	CRIg; Z39IG
ILMN_1703538	NM_001623.3	AIF1	199	AIF1	-1.24582	0.1263	0.318918	0.307613	1.69517e-19	3.20685e-16	-0.901188	0.142596	0.374101	0.361061	1.26294e-09	1.86655e-06	allograft inflammatory factor 1 (AIF1), transcript variant 3, mRNA.	AIF-1; IRT-1; IBA1
ILMN_1676563	NM_002775.3	HTRA1	5654	HTRA1	-1.31672	0.133603	0.318581	0.307271	1.80031e-19	3.27477e-16	-0.947865	0.153063	0.370521	0.357407	2.54562e-09	2.7573e-06	HtrA serine peptidase 1 (HTRA1), mRNA.	HtrA; PRSS11; ARMD7; ORF480; L56
ILMN_2123743	NM_004106.1	FCER1G	2207	FCER1G	-0.916829	0.0932523	0.317635	0.30631	2.13116e-19	3.733e-16	-0.661032	0.105646	0.372328	0.359252	1.78774e-09	2.22785e-06	Fc fragment of IgE, high affinity I, receptor for; gamma polypeptide (FCER1G), mRNA.
ILMN_1668629	XM_937968.2	LOC401115	401115	C4orf48	-1.4391	0.146805	0.316485	0.305141	2.61601e-19	4.26626e-16	-1.05463	0.158776	0.383307	0.370459	2.04974e-10	5.70237e-07	PREDICTED: hypothetical gene supported by BC038466; BC062790 (LOC401115), mRNA.
ILMN_1677827	NM_016562.3	TLR7	51284	TLR7	-2.73937	0.279879	0.315886	0.304532	2.91028e-19	4.43996e-16	-1.98349	0.310604	0.375971	0.362971	8.7447e-10	1.53175e-06	toll-like receptor 7 (TLR7), mRNA.
ILMN_1749109	NM_001042465.1	PSAP	5660	PSAP	-2.036	0.208774	0.314473	0.303095	3.74138e-19	5.52953e-16	-1.46159	0.235655	0.370789	0.357681	2.41583e-09	2.72035e-06	prosaposin (PSAP), transcript variant 2, mRNA.	GLBA; SAP1; MGC110993; FLJ00245
ILMN_1778136	NM_032265.1	ZMYND15	84225	ZMYND15	-2.10715	0.216774	0.313213	0.301814	4.67844e-19	6.50771e-16	-1.53479	0.235057	0.380065	0.367149	3.8992e-10	9.06868e-07	zinc finger, MYND-type containing 15 (ZMYND15), transcript variant 2, mRNA.	DKFZp434N127
ILMN_2087656	NM_007256.2	SLCO2B1	11309	SLCO2B1	-1.26346	0.130458	0.311793	0.30037	6.01664e-19	8.13003e-16	-0.907966	0.145035	0.372421	0.359347	1.75545e-09	2.22785e-06	solute carrier organic anion transporter family, member 2B1 (SLCO2B1), mRNA.	KIAA0880; OATPB; SLC21A9; OATP2B1; DKFZp686E0517; OATP-B
ILMN_1714602	NM_006889.3	CD86	942	CD86	-1.80699	0.187187	0.310542	0.299099	7.50515e-19	9.5932e-16	-1.30212	0.205797	0.374307	0.361272	1.21287e-09	1.85037e-06	CD86 molecule (CD86), transcript variant 2, mRNA.	B7-2; B70; LAB72; MGC34413; CD28LG2
ILMN_1778977	NM_003332.2	TYROBP	7305	TYROBP	-0.764714	0.0791907	0.310669	0.299228	7.33859e-19	9.5932e-16	-0.544517	0.0897103	0.367094	0.353908	4.96493e-09	4.5156e-06	TYRO protein tyrosine kinase binding protein (TYROBP), transcript variant 1, mRNA.	DAP12; KARAP; PLOSL
ILMN_3228688	XM_001720835.1	LOC730415	730415	HLA-DRB1	-1.18372	0.122706	0.310278	0.298831	7.86314e-19	9.7863e-16	-0.856276	0.133691	0.37651	0.363521	7.86519e-10	1.51533e-06	PREDICTED: hypothetical LOC730415, transcript variant 2 (LOC730415), mRNA.
ILMN_1803277	NM_005115.3	MVP	9961	MVP	-2.22706	0.23096	0.310111	0.29866	8.09936e-19	9.82182e-16	-1.61067	0.251604	0.376417	0.363426	8.01014e-10	1.51533e-06	major vault protein (MVP), transcript variant 2, mRNA.	LRP; VAULT1
ILMN_1733270	NM_004244.4	CD163	9332	CD163	-1.44813	0.150713	0.308752	0.297279	1.02913e-18	1.1319e-15	-1.02452	0.17211	0.36386	0.350607	9.29867e-09	6.9805e-06	CD163 molecule (CD163), transcript variant 1, mRNA.	MM130; M130
ILMN_2203271	NM_002030.3	FPR3	2359	FPR3	-1.26695	0.131734	0.309112	0.297645	9.65856e-19	1.1319e-15	-0.909345	0.145337	0.372322	0.359245	1.79004e-09	2.22785e-06	formyl peptide receptor 3 (FPR3), mRNA.	FMLPY; RMLP-R-I; FPRH2; FPRH1; FML2_HUMAN
ILMN_1772218	NM_033554.2	HLA-DPA1	3113	HLA-DPA1	-1.09897	0.114331	0.308899	0.297428	1.00286e-18	1.1319e-15	-0.790372	0.125491	0.373489	0.360437	1.42397e-09	2.04077e-06	major histocompatibility complex, class II, DP alpha 1 (HLA-DPA1), mRNA.	HLADP; HLA-DP1A; HLASB
ILMN_1744604	NM_000101.2	CYBA	1535	CYBA	-1.33506	0.139132	0.308242	0.29676	1.12595e-18	1.21024e-15	-0.962955	0.151479	0.375152	0.362134	1.02746e-09	1.67561e-06	cytochrome b-245, alpha polypeptide (CYBA), mRNA.
ILMN_1728478	NM_022059.1	CXCL16	58191	CXCL16	-1.12964	0.118276	0.306457	0.294946	1.54101e-18	1.51834e-15	-0.807859	0.130241	0.370806	0.357698	2.40786e-09	2.72035e-06	chemokine (C-X-C motif) ligand 16 (CXCL16), mRNA.	SRPSOX; CXCLG16; SR-PSOX
ILMN_1686623	NM_005211.2	CSF1R	1436	CSF1R	-1.12565	0.118069	0.305776	0.294254	1.7365e-18	1.67604e-15	-0.800754	0.131163	0.368075	0.35491	4.102e-09	4.04167e-06	colony stimulating factor 1 receptor, formerly McDonough feline sarcoma viral (v-fms) oncogene homolog (CSF1R), mRNA.	C-FMS; FMS; FIM2; CSFR; CD115
ILMN_1810172	NM_003014.2	SFRP4	6424	SFRP4	-0.732467	0.0769184	0.305329	0.293799	1.87814e-18	1.77649e-15	-0.539676	0.0802248	0.385757	0.37296	1.25841e-10	4.95961e-07	secreted frizzled-related protein 4 (SFRP4), mRNA.	FRPHE; MGC26498; FRP-4
ILMN_1807925	NM_053064.3	GNG2	54331	GNG2	-1.43126	0.150737	0.304229	0.292681	2.2774e-18	2.07129e-15	-1.01016	0.169373	0.364176	0.350929	8.74798e-09	6.67302e-06	guanine nucleotide binding protein (G protein), gamma 2 (GNG2), mRNA.
ILMN_1785902	NM_172369.2	C1QC	714	C1QC	-0.848336	0.0895135	0.303515	0.291956	2.58017e-18	2.25975e-15	-0.601481	0.0992803	0.36678	0.353588	5.27734e-09	4.62197e-06	complement component 1, q subcomponent, C chain (C1QC), mRNA.	C1q-C; C1QG; FLJ27103
ILMN_1652825	NM_001558.2	IL10RA	3587	IL10RA	-2.09199	0.221829	0.301658	0.290067	3.56904e-18	3.01418e-15	-1.46628	0.250396	0.361208	0.3479	1.55281e-08	1.0961e-05	interleukin 10 receptor, alpha (IL10RA), mRNA.	IL-10R1; CDW210A; IL10R; HIL-10R
ILMN_1699931	NM_001007469.1	HCST	10870	HCST	-0.885917	0.0939902	0.301458	0.289864	3.69581e-18	3.06648e-15	-0.624641	0.104634	0.36433	0.351087	8.49025e-09	6.67302e-06	hematopoietic cell signal transducer (HCST), transcript variant 2, mRNA.	DKFZP586C1522; DAP10; PIK3AP; KAP10
ILMN_2331082	NM_206938.1	MS4A7	58475	MS4A7	-0.92994	0.0988259	0.300829	0.289224	4.12413e-18	3.36287e-15	-0.641732	0.115627	0.35298	0.3395	7.54088e-08	3.22694e-05	membrane-spanning 4-domains, subfamily A, member 7 (MS4A7), transcript variant 2, mRNA.	CFFM4; MGC22368; MS4A8; 4SPAN2; CD20L4
ILMN_1804174	XM_938851.1	FCGR2B	2213	FCGR2B	-2.92121	0.311329	0.299756	0.288134	4.97065e-18	3.95657e-15	-2.1421	0.323421	0.382759	0.3699	2.28549e-10	6.00499e-07	PREDICTED: Fc fragment of IgG, low affinity IIb, receptor (CD32) (FCGR2B), mRNA.
ILMN_1737918	NM_015991.1	C1QA	712	C1QA	-2.0433	0.217798	0.2997	0.288077	5.01954e-18	3.95657e-15	-1.44836	0.238472	0.367198	0.354015	4.86528e-09	4.51174e-06	complement component 1, q subcomponent, alpha polypeptide (C1QA), mRNA.
ILMN_1745954	NM_014325.2	CORO1C	23603	CORO1C	-1.90207	0.202832	0.299539	0.287914	5.1618e-18	4.002e-15	-1.31588	0.233827	0.355044	0.341608	5.0797e-08	2.54584e-05	coronin, actin binding protein, 1C (CORO1C), transcript variant 1, mRNA.	HCRNN4; coronin-3
ILMN_1683146	NM_002032.2	FTH1	2495	FTH1	-1.341	0.144349	0.296039	0.284355	9.47453e-18	6.68788e-15	-0.928946	0.163064	0.356901	0.343503	3.55819e-08	2.00335e-05	ferritin, heavy polypeptide 1 (FTH1), mRNA.	MGC104426; FTHL6; PIG15; PLIF; FTH
ILMN_1689655	NM_019111.3	HLA-DRA	3122	HLA-DRA	-1.00136	0.108097	0.294981	0.28328	1.13773e-17	7.6223e-15	-0.698541	0.119935	0.360349	0.347023	1.83255e-08	1.22068e-05	major histocompatibility complex, class II, DR alpha (HLA-DRA), mRNA.	HLA-DRA1
ILMN_1682928	NM_019029.2	CPVL	54504	CPVL	-1.23017	0.132862	0.294802	0.283097	1.17354e-17	7.70853e-15	-0.84833	0.150692	0.355098	0.341663	5.02782e-08	2.54584e-05	carboxypeptidase, vitellogenic-like (CPVL), transcript variant 2, mRNA.	HVLP; MGC10029
ILMN_1744517	NM_002076.2	GNS	2799	GNS	-1.69421	0.183432	0.293888	0.282169	1.3741e-17	8.86305e-15	-1.17662	0.204389	0.358517	0.345153	2.60821e-08	1.62861e-05	glucosamine (N-acetyl)-6-sulfatase (Sanfilippo disease IIID) (GNS), mRNA.	G6S; MGC21274
ILMN_1771376	NM_003768.2	PEA15	8682	PEA15	-2.01696	0.218601	0.29351	0.281784	1.46682e-17	9.24955e-15	-1.42079	0.237383	0.364756	0.351522	7.81719e-09	6.2662e-06	phosphoprotein enriched in astrocytes 15 (PEA15), mRNA.	HUMMAT1H; PEA-15; PED; MAT1; MAT1H; HMAT1
ILMN_1771261	NM_030786.1	SYNC1	81493	SYNC	-1.46317	0.158644	0.293362	0.281633	1.50483e-17	9.36437e-15	-1.04468	0.168735	0.370482	0.357367	2.56526e-09	2.7573e-06	syncoilin, intermediate filament 1 (SYNC1), mRNA.	SYNC; MGC149626; SYNCOILIN; MGC149625
ILMN_1797731	NM_022349.2	MS4A6A	64231	MS4A6A	-0.926507	0.100558	0.292989	0.281254	1.60468e-17	9.85609e-15	-0.654789	0.10848	0.366159	0.352954	5.95376e-09	4.85478e-06	membrane-spanning 4-domains, subfamily A, member 6A (MS4A6A), transcript variant 2, mRNA.	CDA01; MSTP090; MGC22650; 4SPAN3; 4SPAN3.2; MS4A6; CD20L3; MST090; MGC131944
ILMN_1761733	NM_002118.3	HLA-DMB	3109	HLA-DMB	-1.06287	0.115814	0.29154	0.279781	2.0596e-17	1.20255e-14	-0.743193	0.126526	0.361699	0.348401	1.41232e-08	1.02761e-05	major histocompatibility complex, class II, DM beta (HLA-DMB), mRNA.	D6S221E; RING7
ILMN_1674250	NM_005337.4	NCKAP1L	3071	NCKAP1L	-1.45096	0.158273	0.291141	0.279376	2.20563e-17	1.27211e-14	-1.00506	0.175429	0.357771	0.344391	3.01025e-08	1.84892e-05	NCK-associated protein 1-like (NCKAP1L), mRNA.	HEM1
ILMN_1801766	NM_017918.3	CCDC109B	55013	CCDC109B	-1.61829	0.176962	0.290237	0.278456	2.57675e-17	1.45889e-14	-1.11998	0.195824	0.357507	0.344122	3.16711e-08	1.88245e-05	coiled-coil domain containing 109B (CCDC109B), mRNA.	FLJ20647
ILMN_1763000	NM_018404.2	ADAP2	55803	ADAP2	-1.42755	0.156119	0.290204	0.278423	2.59117e-17	1.45889e-14	-0.975592	0.176722	0.352198	0.338702	8.75462e-08	3.58237e-05	ArfGAP with dual PH domains 2 (ADAP2), mRNA.	cent-b; HSA272195
ILMN_1793695	NM_001001851.1	ITIH5	80760	ITIH5	-1.1813	0.12923	0.290087	0.278304	2.64392e-17	1.47108e-14	-0.855652	0.133982	0.375983	0.362983	8.72491e-10	1.53175e-06	inter-alpha (globulin) inhibitor H5 (ITIH5), transcript variant 3, mRNA.	DKFZp686F0145; pp14776; MGC10848
ILMN_2115434	NM_006834.2	RAB32	10981	RAB32	-1.88797	0.208202	0.287163	0.275332	4.36364e-17	2.21907e-14	-1.31946	0.224809	0.361573	0.348273	1.44706e-08	1.03693e-05	RAB32, member RAS oncogene family (RAB32), mRNA.
ILMN_1810275	NM_003982.2	SLC7A7	9056	SLC7A7	-1.46127	0.16121	0.287019	0.275186	4.47218e-17	2.25008e-14	-0.998433	0.180253	0.352689	0.339204	7.97095e-08	3.36588e-05	solute carrier family 7 (cationic amino acid transporter, y+ system), member 7 (SLC7A7), mRNA.	LAT3; y+LAT-1; LPI; Y+LAT1
ILMN_3238196	NM_013385.3	CYTH4	27128	CYTH4	-1.48911	0.164695	0.286111	0.274263	5.22278e-17	2.52047e-14	-0.997056	0.19044	0.344773	0.331122	3.59244e-07	9.70861e-05	cytohesin 4 (CYTH4), mRNA.
ILMN_1695880	NM_002317.3	LOX	4015	LOX	-1.24742	0.1384	0.284971	0.273103	6.34528e-17	3.00094e-14	-0.886102	0.145499	0.36766	0.354486	4.44744e-09	4.29259e-06	lysyl oxidase (LOX), mRNA.	MGC105112
ILMN_1705442	NM_144601.2	CMTM3	123920	CMTM3	-1.5525	0.172811	0.283795	0.271908	7.75233e-17	3.5596e-14	-1.05463	0.192816	0.350856	0.337332	1.13107e-07	4.1395e-05	CKLF-like MARVEL transmembrane domain containing 3 (CMTM3), transcript variant 1, mRNA.	BNAS2; CKLFSF3; FLJ31762; MGC51956
ILMN_2282641	NM_001061.2	TBXAS1	6916	TBXAS1	-1.73513	0.193604	0.282935	0.271034	8.97414e-17	4.08099e-14	-1.19403	0.211228	0.35572	0.342297	4.4628e-08	2.3715e-05	thromboxane A synthase 1 (platelet, cytochrome P450, family 5, subfamily A) (TBXAS1), transcript variant TXS-I, mRNA.	TS; CYP5A1; TXS; TXAS; CYP5; THAS
ILMN_1668374	NM_002213.3	ITGB5	3693	ITGB5	-1.44943	0.161794	0.282784	0.27088	9.20809e-17	4.1475e-14	-0.959636	0.188079	0.34138	0.327659	6.82149e-07	0.00014598	integrin, beta 5 (ITGB5), mRNA. XM_944688 XM_944693	FLJ26658
ILMN_1747622	NM_001772.3	CD33	945	CD33	-2.31567	0.259229	0.281761	0.26984	1.09558e-16	4.75359e-14	-1.57173	0.287581	0.350743	0.337217	1.15551e-07	4.1395e-05	CD33 molecule (CD33), transcript variant 1, mRNA.	SIGLEC3; FLJ00391; SIGLEC-3; p67
ILMN_2355559	NM_002778.2	PSAP	5660	PSAP	-1.84815	0.206949	0.281662	0.269739	1.11427e-16	4.79074e-14	-1.27774	0.223542	0.357414	0.344027	3.22427e-08	1.88258e-05	prosaposin (PSAP), transcript variant 1, mRNA.	GLBA; SAP1; MGC110993; FLJ00245
ILMN_2059549	NM_003177.3	SYK	6850	SYK	-1.59403	0.17858	0.28149	0.269565	1.14715e-16	4.8877e-14	-1.07534	0.199807	0.348559	0.334987	1.7515e-07	5.67366e-05	spleen tyrosine kinase (SYK), mRNA.
ILMN_2190084	NM_003761.2	VAMP8	8673	VAMP8	-1.31546	0.147455	0.281288	0.269359	1.18727e-16	5.01346e-14	-0.899909	0.161453	0.353612	0.340145	6.68221e-08	3.05899e-05	vesicle-associated membrane protein 8 (endobrevin) (VAMP8), mRNA.	VAMP5; EDB
ILMN_2379644	NM_004355.2	CD74	972	CD74	-1.07169	0.120269	0.280874	0.268938	1.27358e-16	5.28262e-14	-0.734132	0.131277	0.354102	0.340646	6.08425e-08	2.90655e-05	CD74 molecule, major histocompatibility complex, class II invariant chain (CD74), transcript variant 2, mRNA.	Ia-GAMMA; DHLAG; HLADG; protein 41
ILMN_2382403	NM_004001.3	FCGR2B	2213	FCGR2B	-1.98332	0.223028	0.280153	0.268205	1.43927e-16	5.81787e-14	-1.40712	0.232591	0.36654	0.353343	5.52873e-09	4.74834e-06	Fc fragment of IgG, low affinity IIb, receptor (CD32) (FCGR2B), transcript variant 1, mRNA.	CD32B; IGFR2; CD32; FCG2; FCGR2
ILMN_2339294	NM_006840.3	LILRB5	10990	LILRB5	-1.25665	0.141536	0.279591	0.267634	1.58299e-16	6.34456e-14	-0.865041	0.152929	0.355818	0.342397	4.37983e-08	2.35738e-05	leukocyte immunoglobulin-like receptor, subfamily B (with TM and ITIM domains), member 5 (LILRB5), transcript variant 2, mRNA.	LIR8; LIR-8; CD85C
ILMN_1698019	NM_001008530.1	LGMN	5641	LGMN	-1.08736	0.122612	0.279178	0.267214	1.69759e-16	6.74671e-14	-0.750929	0.131789	0.356931	0.343534	3.53721e-08	2.00335e-05	legumain (LGMN), transcript variant 2, mRNA.	AEP; LGMN1; PRSC1
ILMN_1660775	XR_018707.1	LOC650152	650152	TPM3	-2.08078	0.234812	0.278904	0.266936	1.77811e-16	6.94992e-14	-1.3651	0.272323	0.339132	0.325364	1.0422e-06	0.00019752	PREDICTED: similar to tropomyosin 3 isoform 2 (LOC650152), mRNA.
ILMN_2121816	NM_003272.1	GPR137B	7107	GPR137B	-2.19236	0.248411	0.277467	0.265474	2.26706e-16	8.78838e-14	-1.48571	0.272463	0.350417	0.336884	1.22972e-07	4.30803e-05	G protein-coupled receptor 137B (GPR137B), mRNA.	TM7SF1
ILMN_1716678	NM_006432.3	NPC2	10577	NPC2	-1.62492	0.184481	0.276766	0.264762	2.55152e-16	9.81069e-14	-1.11201	0.199361	0.353719	0.340255	6.54629e-08	3.0429e-05	Niemann-Pick disease, type C2 (NPC2), mRNA.	MGC1333; NP-C2; HE1
ILMN_1790859	NM_001012973.1	PLAC9	219348	PLAC9	-0.899374	0.102234	0.276333	0.264322	2.74506e-16	1.04697e-13	-0.579274	0.120958	0.33362	0.319737	2.93417e-06	0.000402229	placenta-specific 9 (PLAC9), mRNA.	MGC104710
ILMN_2331087	NM_206938.1	MS4A7	58475	MS4A7	-1.27857	0.145505	0.27593	0.263912	2.93781e-16	1.11153e-13	-0.836977	0.167078	0.339049	0.325279	1.05856e-06	0.000198478	membrane-spanning 4-domains, subfamily A, member 7 (MS4A7), transcript variant 2, mRNA.	CFFM4; MGC22368; MS4A8; 4SPAN2; CD20L4
ILMN_1789751	NM_022736.1	MFSD1	64747	MFSD1	-2.00104	0.227951	0.27558	0.263556	3.11649e-16	1.16977e-13	-1.36779	0.245944	0.353282	0.339808	7.11781e-08	3.11694e-05	major facilitator superfamily domain containing 1 (MFSD1), mRNA.	UG0581B09; FLJ14153
ILMN_1705617	NM_005507.2	CFL1	1072	CFL1	-2.25088	0.256508	0.275448	0.263422	3.18623e-16	1.18653e-13	-1.49788	0.28672	0.344482	0.330826	3.79549e-07	0.000101084	cofilin 1 (non-muscle) (CFL1), mRNA.	CFL
ILMN_2364110	NM_001005742.1	GBA	2629	GBA	-2.93705	0.334749	0.275401	0.263374	3.21177e-16	1.1867e-13	-2.09385	0.344416	0.367363	0.354183	4.71171e-09	4.45671e-06	glucosidase, beta; acid (includes glucosylceramidase) (GBA), transcript variant 3, mRNA.	GCB; GBA1; GLUC
ILMN_1660021	NM_005817.3	M6PRBP1	10226	PLIN3	-1.45427	0.16591	0.275061	0.263029	3.40072e-16	1.24677e-13	-0.957749	0.188048	0.341149	0.327423	7.1264e-07	0.000150415	mannose-6-phosphate receptor binding protein 1 (M6PRBP1), mRNA.	MGC2012; TIP47; PP17; MGC11117
ILMN_2311166	NM_002213.3	ITGB5	3693	ITGB5	-1.39708	0.159495	0.274822	0.262785	3.54061e-16	1.28808e-13	-0.9073	0.184607	0.336697	0.322878	1.64742e-06	0.000271474	integrin, beta 5 (ITGB5), mRNA. XM_944688 XM_944693	FLJ26658
ILMN_1782292	NM_005561.2	LAMP1	3916	LAMP1	-2.29331	0.261915	0.274683	0.262644	3.62426e-16	1.30844e-13	-1.58221	0.278842	0.356294	0.342883	3.99763e-08	2.19842e-05	lysosomal-associated membrane protein 1 (LAMP1), mRNA.	LGP120; LAMPA; CD107a
ILMN_1787529	NM_004054.2	C3AR1	719	C3AR1	-2.31957	0.265109	0.274425	0.262382	3.78501e-16	1.35612e-13	-1.54108	0.295972	0.344038	0.330372	4.12861e-07	0.000106575	complement component 3a receptor 1 (C3AR1), mRNA.	HNFAG09; C3AR; AZ3B
ILMN_1727194	NM_001219.2	CALU	813	CALU	-2.25148	0.25759	0.274068	0.262019	4.01928e-16	1.41857e-13	-1.54367	0.27586	0.354197	0.340743	5.974e-08	2.883e-05	calumenin (CALU), mRNA.	FLJ90608
ILMN_1773963	NM_002068.1	GNA15	2769	GNA15	-2.8291	0.325075	0.272562	0.260488	5.17548e-16	1.77369e-13	-1.9199	0.351099	0.35082	0.337295	1.13879e-07	4.1395e-05	guanine nucleotide binding protein (G protein), alpha 15 (Gq class) (GNA15), mRNA.	GNA16
ILMN_1673282	NM_002294.1	LAMP2	3920	LAMP2	-2.13253	0.245178	0.272362	0.260285	5.3524e-16	1.82112e-13	-1.64545	0.235003	0.393774	0.381145	2.51904e-11	1.4892e-07	lysosomal-associated membrane protein 2 (LAMP2), transcript variant LAMP2A, mRNA.	CD107b; LAMP-2C; LAMPB
ILMN_1656900	NM_177536.1	SULT1A1	6817		-1.30181	0.150275	0.270961	0.258861	6.76797e-16	2.25412e-13	-0.883498	0.161637	0.350759	0.337233	1.15212e-07	4.1395e-05	sulfotransferase family, cytosolic, 1A, phenol-preferring, member 1 (SULT1A1), transcript variant 5, mRNA.	HAST1/HAST2; MGC5163; P-PST; MGC131921; ST1A3; TSPST1; STP1; STP; PST
ILMN_1811702	NM_002087.2	GRN	2896	GRN	-1.64431	0.190126	0.27039	0.25828	7.4476e-16	2.44602e-13	-1.1172	0.20395	0.351072	0.337553	1.08535e-07	4.1395e-05	granulin (GRN), mRNA.	PEPI; PGRN; PCDGF; GEP; GP88
ILMN_2073235	NR_002205.1	FTHL12	2504	FTH1	-1.1237	0.12996	0.270307	0.258196	7.55098e-16	2.46287e-13	-0.753179	0.141622	0.346904	0.333298	2.39819e-07	7.17156e-05	ferritin, heavy polypeptide-like 12 (FTHL12) on chromosome 9.
ILMN_1796755	NM_002213.3	ITGB5	3693	ITGB5	-1.65589	0.191681	0.27	0.257884	7.94948e-16	2.57509e-13	-1.07454	0.217663	0.337239	0.323432	1.48784e-06	0.000251306	integrin, beta 5 (ITGB5), mRNA. XM_944688 XM_944693	FLJ26658
ILMN_1799725	NM_004946.1	DOCK2	1794	DOCK2	-1.41085	0.163941	0.268684	0.256546	9.90433e-16	3.14003e-13	-0.928695	0.181819	0.34152	0.327801	6.64452e-07	0.000144814	dedicator of cytokinesis 2 (DOCK2), mRNA.	FLJ46592; KIAA0209
ILMN_1698367	NM_003874.1	CD84	8832	CD84	-2.355	0.274199	0.267997	0.255847	1.11072e-15	3.47883e-13	-1.59391	0.293719	0.349728	0.336181	1.40206e-07	4.73637e-05	CD84 molecule (CD84), mRNA.	DKFZp781E2378; SLAMF5; mCD84; LY9B; hCD84
ILMN_1660027	NM_004001.3	FCGR2B	2213	FCGR2B	-1.4944	0.174397	0.267209	0.255047	1.26651e-15	3.88951e-13	-1.05001	0.179552	0.360993	0.34768	1.61876e-08	1.12585e-05	Fc fragment of IgG, low affinity IIb, receptor (CD32) (FCGR2B), transcript variant 1, mRNA.	CD32B; IGFR2; CD32; FCG2; FCGR2
ILMN_1729234	NM_000391.3	TPP1	1200	TPP1	-1.70996	0.199698	0.266961	0.254795	1.31987e-15	3.98595e-13	-1.13603	0.217889	0.344216	0.330554	3.9917e-07	0.00010488	tripeptidyl peptidase I (TPP1), mRNA.	MGC21297; LPIC; TPP I; GIG1; CLN2
ILMN_2207505	NM_000230.1	LEP	3952	LEP	-0.881666	0.10297	0.266946	0.25478	1.3232e-15	3.98595e-13	-0.57275	0.115465	0.337825	0.32403	1.33258e-06	0.000233237	leptin (obesity homolog, mouse) (LEP), mRNA.	OB; OBS
ILMN_1766169	NM_005504.4	BCAT1	586	BCAT1	-1.13968	0.133194	0.266712	0.254542	1.37575e-15	4.11803e-13	-0.765824	0.143368	0.347512	0.333919	2.1369e-07	6.60538e-05	branched chain aminotransferase 1, cytosolic (BCAT1), mRNA.	MECA39; ECA39; PNAS-121; DKFZp686E12175; BCT1
ILMN_1792489	NM_005731.2	ARPC2	10109	ARPC2	-2.32417	0.272449	0.265681	0.253493	1.6334e-15	4.82812e-13	-1.49759	0.307342	0.335662	0.321821	2.0008e-06	0.000308914	actin related protein 2/3 complex, subunit 2, 34kDa (ARPC2), transcript variant 2, mRNA.	ARC34; PRO2446; PNAS-139; p34-Arc
ILMN_1726589	NM_020404.2	CD248	57124	CD248	-0.88134	0.103487	0.265112	0.252914	1.7955e-15	5.27431e-13	-0.581911	0.11314	0.342419	0.328719	5.60721e-07	0.000129423	CD248 molecule, endosialin (CD248), mRNA.	MGC119478; CD164L1; TEM1; MGC119479
ILMN_1685009	NM_000632.3	ITGAM	3684	ITGAM	-1.42958	0.167935	0.264964	0.252764	1.84011e-15	5.33901e-13	-0.940642	0.184252	0.341454	0.327734	6.72789e-07	0.000145143	integrin, alpha M (complement component 3 receptor 3 subunit) (ITGAM), transcript variant 2, mRNA.	MO1A; MAC1A; CD11B; MAC-1; CR3A; MGC117044
ILMN_1746517	NM_003937.2	KYNU	8942	KYNU	-1.37398	0.161449	0.264868	0.252666	1.8697e-15	5.36792e-13	-0.912459	0.175237	0.344042	0.330376	4.12566e-07	0.000106575	kynureninase (L-kynurenine hydrolase) (KYNU), transcript variant 1, mRNA.
ILMN_1791211	NM_003974.2	DOK2	9046	DOK2	-2.64724	0.31121	0.264707	0.252503	1.9203e-15	5.47099e-13	-1.74514	0.340455	0.341978	0.328269	6.09376e-07	0.0001378	docking protein 2, 56kDa (DOK2), mRNA.	p56DOK; p56dok-2
ILMN_2175912	NM_000211.2	ITGB2	3689	ITGB2	-0.642326	0.0755227	0.264659	0.252454	1.93568e-15	5.48181e-13	-0.422145	0.0828996	0.341127	0.3274	7.15595e-07	0.000150415	integrin, beta 2 (complement component 3 receptor 3 and 4 subunit) (ITGB2), mRNA.	MAC-1; LFA-1; MF17; LCAMB; MFI7; LAD; CD18
ILMN_2310896	NM_004895.3	NLRP3	114548	NLRP3	-3.44785	0.406494	0.263736	0.251516	2.25615e-15	6.20362e-13	-2.34475	0.42917	0.350694	0.337167	1.16642e-07	4.1395e-05	NLR family, pyrin domain containing 3 (NLRP3), transcript variant 1, mRNA.	AII/AVP; AGTAVPRL; PYPAF1; NALP3; MWS; CIAS1; C1orf7; FCU; FCAS; AVP; AII; CLR1.1
ILMN_1655935	NM_001114.3	ADCY7	113	ADCY7	-3.2971	0.388882	0.263595	0.251373	2.30934e-15	6.31318e-13	-2.17969	0.422792	0.342728	0.329035	5.28888e-07	0.000126329	adenylate cyclase 7 (ADCY7), mRNA.	KIAA0037; FLJ36387
ILMN_2207504	NM_000230.1	LEP	3952	LEP	-0.684352	0.0807373	0.26351	0.251286	2.34215e-15	6.36607e-13	-0.448854	0.0885362	0.340559	0.326821	7.96439e-07	0.000160284	leptin (obesity homolog, mouse) (LEP), mRNA.	OB; OBS
ILMN_1693826	NM_032782.3	HAVCR2	84868	HAVCR2	-0.988513	0.1167	0.263282	0.251054	2.43266e-15	6.5743e-13	-0.67045	0.123422	0.349873	0.336329	1.36395e-07	4.66704e-05	hepatitis A virus cellular receptor 2 (HAVCR2), mRNA.	TIMD3; FLJ14428; KIM-3; Tim-3; TIM3
ILMN_1800512	NM_002133.1	HMOX1	3162	HMOX1	-1.63273	0.193457	0.262053	0.249805	2.98156e-15	8.01191e-13	-1.10896	0.203793	0.35012	0.33658	1.30137e-07	4.52551e-05	heme oxygenase (decycling) 1 (HMOX1), mRNA.	HO-1; bK286B10
ILMN_1804629	NM_001042482.1	TPK1	27010	TPK1	-3.05874	0.363884	0.260699	0.248428	3.72987e-15	9.74587e-13	-2.08469	0.381041	0.350893	0.33737	1.12302e-07	4.1395e-05	thiamin pyrophosphokinase 1 (TPK1), transcript variant 2, mRNA.	PP20; HTPK1
ILMN_2414027	NM_001040139.1	CKLF	51192	CKLF,CKLF-CMTM1	-2.13424	0.254019	0.260543	0.24827	3.82723e-15	9.83724e-13	-1.42156	0.271912	0.34458	0.330926	3.72578e-07	0.000100118	chemokine-like factor (CKLF), transcript variant 6, mRNA.	UCK-1; CKLF1; CKLF4; CKLF2; CKLF3; C32; HSPC224
ILMN_1654396	NM_000211.1	ITGB2	3689	ITGB2	-0.639437	0.0761671	0.260275	0.247997	4.00043e-15	1.02268e-12	-0.417708	0.0831397	0.339416	0.325654	9.87894e-07	0.000191998	integrin, beta 2 (antigen CD18 (p95), lymphocyte function-associated antigen 1; macrophage antigen 1 (mac-1) beta subunit) (ITGB2), mRNA.	MAC-1; LFA-1; MF17; LCAMB; MFI7; LAD; CD18
ILMN_1705570	NM_018649.2	H2AFY2	55506	H2AFY2	-3.07862	0.3668	0.260195	0.247916	4.05372e-15	1.03073e-12	-2.17098	0.372381	0.360504	0.347181	1.77881e-08	1.20181e-05	H2A histone family, member Y2 (H2AFY2), mRNA.	macroH2A2
ILMN_1724250	NM_002087.2	GRN	2896	GRN	-1.40029	0.166867	0.260132	0.247852	4.09577e-15	1.03586e-12	-0.942627	0.176602	0.347406	0.33381	2.18056e-07	6.69657e-05	granulin (GRN), mRNA.	PEPI; PGRN; PCDGF; GEP; GP88
ILMN_1769433	NM_006633.2	IQGAP2	10788	IQGAP2	-2.21011	0.263872	0.259498	0.247207	4.54811e-15	1.13799e-12	-1.51434	0.274347	0.352179	0.338683	8.78664e-08	3.58237e-05	IQ motif containing GTPase activating protein 2 (IQGAP2), mRNA.
ILMN_1812392	NM_021103.3	TMSB10	9168	TMSB10	-3.18982	0.381161	0.259218	0.246923	4.76275e-15	1.17932e-12	-1.97984	0.439701	0.326807	0.312782	1.04739e-05	0.00103631	thymosin beta 10 (TMSB10), mRNA.	MIG12; TB10
ILMN_1656300	NM_001495.4	GFRA2	2675	GFRA2	-1.62052	0.193842	0.258872	0.246571	5.04282e-15	1.24216e-12	-1.08635	0.20542	0.346134	0.332512	2.7754e-07	8.15279e-05	GDNF family receptor alpha 2 (GFRA2), transcript variant 1, mRNA.	NTNRA; RETL2; TRNR2; NRTNR-ALPHA; GDNFRB
ILMN_1666932	NM_021642.2	FCGR2A	2212	FCGR2A	-1.07456	0.128576	0.258766	0.246464	5.131e-15	1.25085e-12	-0.709237	0.138314	0.342024	0.328317	6.04065e-07	0.000137349	Fc fragment of IgG, low affinity IIa, receptor (CD32) (FCGR2A), mRNA.	FCGR2A1; CDw32; CD32A; CD32; FcGR; FCG2; IGFR2; FCGR2; MGC30032; MGC23887
ILMN_2344373	NM_017458.2	MVP	9961	MVP	-2.81325	0.337529	0.25787	0.245553	5.94717e-15	1.44239e-12	-1.80034	0.374063	0.3342	0.320329	2.63182e-06	0.000376041	major vault protein (MVP), transcript variant 1, mRNA.	LRP; VAULT1
ILMN_1754894	NM_174896.2	C1orf162	128346	C1orf162	-0.891356	0.107048	0.257544	0.245221	6.27531e-15	1.50251e-12	-0.58911	0.114668	0.342273	0.32857	5.764e-07	0.000132331	chromosome 1 open reading frame 162 (C1orf162), mRNA.	MGC24133
ILMN_2302757	NM_003890.1	FCGBP	8857	FCGBP	-0.440858	0.053129	0.256397	0.244055	7.57768e-15	1.77415e-12	-0.286984	0.0576055	0.338361	0.324577	1.20492e-06	0.000218336	Fc fragment of IgG binding protein (FCGBP), mRNA.	FC(GAMMA)BP
ILMN_1675797	NM_017549.3	EPDR1	54749	EPDR1	-1.09583	0.132094	0.256316	0.243973	7.67868e-15	1.78894e-12	-0.734872	0.139192	0.345905	0.332278	2.89902e-07	8.41142e-05	ependymin related protein 1 (zebrafish) (EPDR1), mRNA.	EPDR; MERP-1; MERP1; UCC1
ILMN_1800354	NM_000099.2	CST3	1471	CST3	-1.88668	0.227454	0.256273	0.243929	7.73366e-15	1.79292e-12	-1.33658	0.22882	0.360809	0.347492	1.67725e-08	1.14962e-05	cystatin C (CST3), mRNA.	MGC117328
ILMN_1689968	NM_025201.3	PLEKHO2	80301	PLEKHO2	-1.66858	0.201511	0.2557	0.243347	8.49631e-15	1.94118e-12	-1.04069	0.228083	0.328213	0.314217	8.05925e-06	0.000854454	pleckstrin homology domain containing, family O member 2 (PLEKHO2), mRNA.	pp9099; PP1628; DKFZp761K2312; FLJ38884
ILMN_1759341	NM_000528.2	MAN2B1	4125	MAN2B1	-2.88931	0.349002	0.255636	0.243282	8.58648e-15	1.95235e-12	-2.02386	0.353928	0.357479	0.344093	3.18426e-08	1.88245e-05	mannosidase, alpha, class 2B, member 1 (MAN2B1), mRNA.	LAMAN; MANB
ILMN_1698766	NM_013258.3	PYCARD	29108	PYCARD	-1.44842	0.175092	0.25538	0.243021	8.95464e-15	2.005e-12	-0.933414	0.191256	0.335852	0.322015	1.93072e-06	0.000302356	PYD and CARD domain containing (PYCARD), transcript variant 1, mRNA.	TMS1; MGC10332; ASC; CARD5
ILMN_2332964	NM_001008530.1	LGMN	5641	LGMN	-1.02423	0.123816	0.255372	0.243014	8.96616e-15	2.005e-12	-0.699795	0.128112	0.350665	0.337137	1.17286e-07	4.1395e-05	legumain (LGMN), transcript variant 2, mRNA.	AEP; LGMN1; PRSC1
ILMN_2396991	NM_014266.3	HCST	10870	HCST	-2.06226	0.249538	0.25506	0.242696	9.43724e-15	2.09542e-12	-1.35707	0.266869	0.340947	0.327217	7.40217e-07	0.000152873	hematopoietic cell signal transducer (HCST), transcript variant 1, mRNA.	DKFZP586C1522; DAP10; PIK3AP; KAP10
ILMN_2067656	NM_001759.2	CCND2	894	CCND2	-0.802525	0.0971448	0.254934	0.242567	9.63567e-15	2.12948e-12	-0.566574	0.097816	0.359478	0.346134	2.16759e-08	1.4043e-05	cyclin D2 (CCND2), mRNA.	KIAK0002; MGC102758
ILMN_2071809	NM_000900.2	MGP	4256	MGP	-1.34166	0.162739	0.254261	0.241884	1.07588e-14	2.35567e-12	-0.88506	0.173328	0.341481	0.327762	6.69302e-07	0.000145143	matrix Gla protein (MGP), mRNA.	NTI; GIG36; MGLAP
ILMN_2370336	NM_148975.1	MS4A4A	51338	MS4A4A	-1.50377	0.182489	0.254106	0.241726	1.10348e-14	2.40498e-12	-0.95853	0.20083	0.333226	0.319335	3.15831e-06	0.000425876	membrane-spanning 4-domains, subfamily A, member 4 (MS4A4A), transcript variant 2, mRNA.	MGC22311; 4SPAN1; MS4A4; MS4A7; HDCME31P; CD20-L1; CD20L1
ILMN_1798706	NM_004951.3	EBI2	1880	GPR183	-1.13966	0.138376	0.253932	0.24155	1.1354e-14	2.46318e-12	-0.737683	0.149923	0.336837	0.323021	1.60477e-06	0.000266302	Epstein-Barr virus induced gene 2 (lymphocyte-specific G protein-coupled receptor) (EBI2), mRNA.
ILMN_2401057	NM_001024649.1	CANX	821	CANX	-2.09587	0.254535	0.253858	0.241474	1.14925e-14	2.48186e-12	-1.31124	0.285347	0.328978	0.314998	6.98783e-06	0.000770503	calnexin (CANX), transcript variant 2, mRNA.	P90; IP90; FLJ26570; CNX
ILMN_1660364	NM_013385.2	PSCD4	27128	CYTH4	-1.30959	0.159212	0.253513	0.241123	1.21613e-14	2.61434e-12	-0.841467	0.173541	0.335076	0.321223	2.2333e-06	0.000333191	pleckstrin homology, Sec7 and coiled-coil domains 4 (PSCD4), mRNA.	DJ63G5.1; CYT4
ILMN_2350634	NM_001039348.1	EFEMP1	2202	EFEMP1	-1.24995	0.152113	0.253186	0.240791	1.28295e-14	2.74076e-12	-0.813023	0.163739	0.33795	0.324157	1.3018e-06	0.000231865	EGF-containing fibulin-like extracellular matrix protein 1 (EFEMP1), transcript variant 2, mRNA.	FBNL; MLVT; FLJ35535; FBLN3; DRAD; S1-5; MGC111353; DHRD; MTLV
ILMN_1712026	NM_001079821.1	NLRP3	114548	NLRP3	-2.96591	0.361401	0.252768	0.240366	1.37374e-14	2.91343e-12	-1.9842	0.37894	0.34479	0.331139	3.5811e-07	9.70861e-05	NLR family, pyrin domain containing 3 (NLRP3), transcript variant 3, mRNA.	AII/AVP; AGTAVPRL; PYPAF1; CIAS1; C1orf7; FCAS; AVP; NALP3; MWS; FCU; AII; CLR1.1
ILMN_1671281	NM_021133.2	RNASEL	6041	RNASEL	-4.02394	0.490543	0.252622	0.240217	1.40704e-14	2.95919e-12	-2.7019	0.512588	0.345687	0.332056	3.02108e-07	8.55562e-05	ribonuclease L (2',5'-oligoisoadenylate synthetase-dependent) (RNASEL), mRNA.	DKFZp781D08126; MGC133329; RNS4; PRCA1; MGC104972
ILMN_1670870	NM_001627.2	ALCAM	214	ALCAM	-0.858876	0.104768	0.252416	0.240008	1.4552e-14	3.03395e-12	-0.564709	0.111465	0.340472	0.326732	8.09677e-07	0.000162258	activated leukocyte cell adhesion molecule (ALCAM), mRNA.	CD166; FLJ38514; MEMD; MGC71733
ILMN_1651958	NM_000900.2	MGP	4256	MGP	-1.379	0.168326	0.252201	0.239789	1.50736e-14	3.08611e-12	-0.914244	0.177687	0.342468	0.32877	5.55515e-07	0.000129421	matrix Gla protein (MGP), mRNA.	NTI; GIG36; MGLAP
ILMN_2383611	NM_130435.2	PTPRE	5791	PTPRE	-1.53016	0.187363	0.251182	0.238754	1.78025e-14	3.61352e-12	-0.994759	0.200821	0.337654	0.323855	1.37617e-06	0.000239282	protein tyrosine phosphatase, receptor type, E (PTPRE), transcript variant 2, mRNA.	DKFZp313F1310; PTPE; HPTPE; R-PTP-EPSILON
ILMN_2093674	NM_004124.2	GMFB	2764	GMFB	-1.92714	0.236054	0.251069	0.238638	1.81348e-14	3.65195e-12	-1.26329	0.251071	0.339602	0.325844	9.53877e-07	0.000186416	glia maturation factor, beta (GMFB), mRNA.	GMF
ILMN_1768394	NM_005717.2	ARPC5	10092	ARPC5	-1.83645	0.224958	0.251051	0.238621	1.81867e-14	3.65195e-12	-1.21088	0.238037	0.340992	0.327263	7.33977e-07	0.000152249	actin related protein 2/3 complex, subunit 5, 16kDa (ARPC5), mRNA.	ARC16; dJ127C7.3; p16-Arc
ILMN_1662932	NM_002298.2	LCP1	3936	LCP1	-0.672643	0.0823993	0.251039	0.238608	1.82234e-14	3.65195e-12	-0.432003	0.0892773	0.334833	0.320976	2.33719e-06	0.000345423	lymphocyte cytosolic protein 1 (L-plastin) (LCP1), mRNA.	L-PLASTIN; PLS2; FLJ26114; CP64; DKFZp781A23186; FLJ39956; LC64P; FLJ25423
ILMN_1796316	NM_004994.2	MMP9	4318	MMP9	-0.442267	0.0542444	0.250642	0.238205	1.94423e-14	3.86347e-12	-0.289666	0.0576852	0.339349	0.325585	1.00045e-06	0.000193123	matrix metallopeptidase 9 (gelatinase B, 92kDa gelatinase, 92kDa type IV collagenase) (MMP9), mRNA.	MMP-9; GELB; CLG4B
ILMN_1720282	NM_000903.2	NQO1	1728	NQO1	-0.610452	0.0749164	0.250452	0.238011	2.00542e-14	3.96839e-12	-0.399421	0.079705	0.339093	0.325324	1.04987e-06	0.000197819	NAD(P)H dehydrogenase, quinone 1 (NQO1), transcript variant 1, mRNA.	NMOR1; NMORI; DHQU; DIA4; DTD; QR1
ILMN_3224926	NM_001098634.1	RBM47	54502	RBM47	-1.59496	0.196155	0.249764	0.237312	2.24356e-14	4.34865e-12	-1.02962	0.210872	0.335907	0.322071	1.91098e-06	0.000302356	RNA binding motif protein 47 (RBM47), transcript variant 1, mRNA.	DKFZp686F02235; FLJ21344; FLJ20273; FLJ21643
ILMN_1652631	NM_022343.2	GLIPR2	152007	GLIPR2	-0.887042	0.109258	0.249272	0.236812	2.4307e-14	4.68447e-12	-0.578194	0.116325	0.338077	0.324287	1.27102e-06	0.000227696	GLI pathogenesis-related 2 (GLIPR2), mRNA.	GLIPR2; GAPR-1
ILMN_2149494	NM_030769.1	NPL	80896	NPL	-1.01628	0.125227	0.249144	0.236682	2.4818e-14	4.73452e-12	-0.652125	0.135148	0.334501	0.320636	2.48749e-06	0.000363096	N-acetylneuraminate pyruvate lyase (dihydrodipicolinate synthase) (NPL), mRNA.	C1orf13; NPL1; MGC149582; MGC61869; c112
ILMN_2168217	NM_004951.3	EBI2	1880	GPR183	-1.91913	0.237077	0.248329	0.235853	2.83386e-14	5.29741e-12	-1.27959	0.247184	0.343268	0.329586	4.77599e-07	0.000117644	Epstein-Barr virus induced gene 2 (lymphocyte-specific G protein-coupled receptor) (EBI2), mRNA.
ILMN_1794190	NM_020739.2	CCPG1	9236	CCPG1,DYX1C1-CCPG1	-2.06233	0.254821	0.248259	0.235782	2.86625e-14	5.33687e-12	-1.44154	0.256217	0.355009	0.341572	5.11387e-08	2.54584e-05	cell cycle progression 1 (CCPG1), transcript variant 2, mRNA.	KIAA1254; CPR8
ILMN_1660871	NM_014397.3	NEK6	10783	NEK6	-2.55824	0.31613	0.248225	0.235747	2.88247e-14	5.34602e-12	-1.63055	0.342459	0.332947	0.319051	3.32768e-06	0.000442077	NIMA (never in mitosis gene a)-related kinase 6 (NEK6), mRNA.	SID6-1512
ILMN_2359907	NM_001251.2	CD68	968	CD68	-1.23884	0.153456	0.247452	0.234961	3.26835e-14	5.96808e-12	-0.772293	0.169277	0.328202	0.314206	8.07588e-06	0.000854454	CD68 molecule (CD68), transcript variant 1, mRNA.	DKFZp686M18236; SCARD1; GP110
ILMN_3241234	XM_001126471.1	LOC730278	730278	S100A11	-1.18996	0.14768	0.246849	0.234349	3.60444e-14	6.43278e-12	-0.744489	0.162093	0.328924	0.314943	7.05822e-06	0.000774504	PREDICTED: hypothetical LOC730278 (LOC730278), mRNA.
ILMN_1782070	NM_030769.1	NPL	80896	NPL	-1.08638	0.134942	0.246573	0.234068	3.76998e-14	6.6778e-12	-0.712403	0.142128	0.339122	0.325354	1.04411e-06	0.00019752	N-acetylneuraminate pyruvate lyase (dihydrodipicolinate synthase) (NPL), mRNA.	C1orf13; NPL1; MGC149582; MGC61869; c112
ILMN_1769245	NM_006851.2	GLIPR1	11010	GLIPR1	-1.45816	0.181227	0.246385	0.233877	3.88654e-14	6.85857e-12	-0.970071	0.188613	0.342416	0.328716	5.60997e-07	0.000129423	GLI pathogenesis-related 1 (GLIPR1), mRNA.	RTVP1; CRISP7; GLIPR
ILMN_1743655	NM_017510.4	TMED9	54732	TMED9	-2.82302	0.351302	0.245983	0.233469	4.14822e-14	7.29316e-12	-1.87919	0.365181	0.342485	0.328787	5.53738e-07	0.000129421	transmembrane emp24 protein transport domain containing 9 (TMED9), mRNA.	HSGP25L2G
ILMN_2085862	NM_016582.1	SLC15A3	51296	SLC15A3	-1.15102	0.143459	0.245486	0.232963	4.49639e-14	7.8181e-12	-0.754155	0.150871	0.338779	0.325004	1.11375e-06	0.000204162	solute carrier family 15, member 3 (SLC15A3), mRNA.	PTR3; OCTP; hPTR3; PHT2; FLJ26631
ILMN_1750805	NM_001025598.1	ARHGAP30	257106	ARHGAP30	-1.62091	0.202137	0.245309	0.232783	4.62743e-14	7.98721e-12	-1.04154	0.215926	0.334461	0.320595	2.50638e-06	0.000363201	Rho GTPase activating protein 30 (ARHGAP30), transcript variant 1, mRNA.	FLJ00267; RP11-544M22.6; FLJ44128
ILMN_1782352	NM_014468.2	VENTX	27287	VENTX	-2.69102	0.33574	0.245164	0.232635	4.73785e-14	8.14807e-12	-1.73906	0.356831	0.335684	0.321844	1.99243e-06	0.000308914	VENT homeobox homolog (Xenopus laevis) (VENTX), mRNA.	HPX42B; MGC119910; MGC119911; VENTX2; NA88A
ILMN_1797522	NM_004090.2	DUSP3	1845	DUSP3	-1.79098	0.223487	0.245108	0.232579	4.78066e-14	8.19191e-12	-1.16764	0.235799	0.337614	0.323815	1.38656e-06	0.000240205	dual specificity phosphatase 3 (vaccinia virus phosphatase VH1-related) (DUSP3), mRNA.	VHR
ILMN_1727284	NM_000616.3	CD4	920	CD4	-3.67014	0.458053	0.245055	0.232525	4.82178e-14	8.23253e-12	-2.4908	0.468448	0.346876	0.33327	2.41104e-07	7.17156e-05	CD4 molecule (CD4), mRNA.	CD4mut
ILMN_1807439	NM_000693.2	ALDH1A3	220	ALDH1A3	-1.00115	0.125307	0.244148	0.231602	5.58509e-14	9.40005e-12	-0.641925	0.133742	0.333878	0.320001	2.7953e-06	0.000391096	aldehyde dehydrogenase 1 family, member A3 (ALDH1A3), mRNA.	RALDH3; ALDH6; ALDH1A6
ILMN_1781626	NM_001734.2	C1S	716	C1S	-1.31034	0.16417	0.243832	0.231282	5.87755e-14	9.79923e-12	-0.806876	0.181224	0.325639	0.31159	1.30176e-05	0.00120178	complement component 1, s subcomponent (C1S), transcript variant 1, mRNA.
ILMN_2366330	NM_031471.4	FERMT3	83706	FERMT3	-1.31927	0.165355	0.243704	0.231151	6.00101e-14	9.92349e-12	-0.830534	0.179017	0.330024	0.316066	5.7478e-06	0.000659797	fermitin family homolog 3 (Drosophila) (FERMT3), transcript variant URP2SF, mRNA.	MIG-2; KIND3; MIG2B; URP2; UNC112C; MGC10966
ILMN_1766637	NM_000169.2	GLA	2717	GLA	-1.94988	0.244559	0.243494	0.230938	6.20827e-14	1.02304e-11	-1.25327	0.260128	0.334321	0.320453	2.57286e-06	0.000370978	galactosidase, alpha (GLA), mRNA.	GALA
ILMN_1717163	NM_000129.3	F13A1	2162	F13A1	-0.962866	0.120783	0.243445	0.230888	6.2573e-14	1.02754e-11	-0.632895	0.126202	0.339185	0.325418	1.03174e-06	0.00019681	coagulation factor XIII, A1 polypeptide (F13A1), mRNA.	F13A
ILMN_1742789	NM_004811.1	LPXN	9404	LPXN	-1.23069	0.154471	0.243258	0.230698	6.44908e-14	1.05173e-11	-0.784347	0.165354	0.332515	0.31861	3.60789e-06	0.000467484	leupaxin (LPXN), mRNA.	LDPL
ILMN_1725320	NM_023068.3	SIGLEC1	6614	SIGLEC1	-5.40985	0.679571	0.243004	0.23044	6.71984e-14	1.09212e-11	-3.83425	0.672465	0.357034	0.343639	3.46805e-08	2.00022e-05	sialic acid binding Ig-like lectin 1, sialoadhesin (SIGLEC1), mRNA.	SIGLEC-1; CD169; DKFZp667F058; FLJ00073; FLJ00411; FLJ00051; FLJ32150; SN; dJ1009E24.1; FLJ00055
ILMN_1795762	NM_002664.1	PLEK	5341	PLEK	-1.18425	0.148799	0.242927	0.230361	6.80386e-14	1.10199e-11	-0.766931	0.15713	0.335862	0.322026	1.92696e-06	0.000302356	pleckstrin (PLEK), mRNA.	P47; FLJ27168
ILMN_2408851	NM_181720.2	ARHGAP30	257106	ARHGAP30	-2.17599	0.273872	0.242393	0.229819	7.41628e-14	1.19301e-11	-1.35873	0.297555	0.328296	0.314302	7.93493e-06	0.000847121	Rho GTPase activating protein 30 (ARHGAP30), transcript variant 2, mRNA.	FLJ00267; FLJ44128; RP11-544M22.6
ILMN_2400372	NM_001054.2	SULT1A2	6799	SULT1A2	-1.52023	0.191428	0.242244	0.229668	7.59679e-14	1.21791e-11	-0.977621	0.20298	0.334283	0.320414	2.59115e-06	0.00037248	sulfotransferase family, cytosolic, 1A, phenol-preferring, member 2 (SULT1A2), transcript variant 1, mRNA.	MGC142287; MGC142289; ST1A2; TSPST2; P-PST; STP2; HAST4
ILMN_1750674	NM_138432.2	SDSL	113675	SDSL	-2.55282	0.321696	0.242006	0.229426	7.89428e-14	1.26132e-11	-1.73914	0.326578	0.347088	0.333486	2.31589e-07	7.06631e-05	serine dehydratase-like (SDSL), mRNA.	SDS-RS1
ILMN_1750278	NR_002205.1	FTHL12	2504	FTH1	-1.10191	0.138952	0.241794	0.22921	8.16949e-14	1.3009e-11	-0.688844	0.150595	0.32848	0.31449	7.66727e-06	0.000824127	ferritin, heavy polypeptide-like 12 (FTHL12) on chromosome 9.
ILMN_1763640	NM_020941.1	KIAA1602	57701	NCKAP5L	-2.14011	0.269895	0.241766	0.229181	8.20716e-14	1.30251e-11	-1.37616	0.285907	0.334209	0.320339	2.62726e-06	0.000376041	KIAA1602 (KIAA1602), mRNA.	FP1193
ILMN_1770824	NM_001666.2	ARHGAP4	393	ARHGAP4	-2.03582	0.257023	0.241423	0.228833	8.67331e-14	1.37189e-11	-1.26133	0.280368	0.326717	0.31269	1.06513e-05	0.00104511	Rho GTPase activating protein 4 (ARHGAP4), mRNA.	p115; C1; RGC1; KIAA0131; RhoGAP4
ILMN_1720303	NM_014028.3	OSTM1	28962	OSTM1	-2.11446	0.267257	0.241065	0.228469	9.18834e-14	1.43347e-11	-1.42281	0.273305	0.344015	0.330349	4.14637e-07	0.000106575	osteopetrosis associated transmembrane protein 1 (OSTM1), mRNA.	GL; HSPC019; GIPN
ILMN_3242540	NM_174941.4	CD163L1	283316	CD163L1	-2.10618	0.266455	0.240777	0.228176	9.62493e-14	1.48759e-11	-1.48535	0.263854	0.355094	0.341658	5.03171e-08	2.54584e-05	CD163 molecule-like 1 (CD163L1), mRNA.	M160; CD163B
ILMN_1730084	NM_007310.1	COMT	1312	COMT	-2.19518	0.278353	0.24006	0.227447	1.08044e-13	1.66443e-11	-1.46485	0.285887	0.341927	0.328217	6.15318e-07	0.0001378	catechol-O-methyltransferase (COMT), transcript variant S-COMT, mRNA.
ILMN_1663490	NM_032255.1	ZNF541	84215	ZNF541	-1.52421	0.193572	0.239578	0.226957	1.16753e-13	1.78696e-11	-0.969659	0.205806	0.331747	0.317826	4.1653e-06	0.000519773	zinc finger protein 541 (ZNF541), mRNA.	MGC119518; MGC119521; MGC119519; DKFZp434I1930
ILMN_1705403	NM_030622.6	CYP2S1	29785	CYP2S1	-5.08301	0.64615	0.239282	0.226656	1.22451e-13	1.85615e-11	-3.39341	0.662591	0.341864	0.328153	6.22622e-07	0.0001378	cytochrome P450, family 2, subfamily S, polypeptide 1 (CYP2S1), mRNA.
ILMN_1732538	NM_004139.2	LBP	3929	LBP	-0.823661	0.104715	0.239248	0.226621	1.23133e-13	1.86052e-11	-0.529601	0.110355	0.333863	0.319985	2.80335e-06	0.000391096	lipopolysaccharide binding protein (LBP), mRNA.	MGC22233
ILMN_1750961	NM_023003.2	TM6SF1	53346	TM6SF1	-2.39816	0.305084	0.239047	0.226417	1.27167e-13	1.91536e-11	-1.43381	0.340567	0.320147	0.305984	3.61155e-05	0.00256849	transmembrane 6 superfamily member 1 (TM6SF1), mRNA.
ILMN_1796734	NM_003118.2	SPARC	6678	SPARC	-1.13764	0.144803	0.238882	0.226249	1.30597e-13	1.96078e-11	-0.718248	0.154622	0.330162	0.316207	5.60235e-06	0.000649405	secreted protein, acidic, cysteine-rich (osteonectin) (SPARC), mRNA.	ON
ILMN_1752728	NM_000147.3	FUCA1	2517	FUCA1	-1.43043	0.182589	0.237999	0.225352	1.50491e-13	2.23815e-11	-0.943417	0.188444	0.33897	0.325199	1.07436e-06	0.000199258	fucosidase, alpha-L- 1, tissue (FUCA1), mRNA.
ILMN_1663390	NM_001255.2	CDC20	991	CDC20	-2.41841	0.308743	0.237957	0.225309	1.51511e-13	2.24626e-11	-1.64247	0.312262	0.345399	0.331762	3.19052e-07	8.92854e-05	cell division cycle 20 homolog (S. cerevisiae) (CDC20), mRNA.	CDC20A; bA276H19.3; MGC102824; p55CDC
ILMN_1736567	NM_001025159.1	CD74	972	CD74	-0.963107	0.123069	0.237667	0.225015	1.58729e-13	2.33861e-11	-0.626264	0.128232	0.335935	0.3221	1.90085e-06	0.000302356	CD74 molecule, major histocompatibility complex, class II invariant chain (CD74), transcript variant 1, mRNA.	Ia-GAMMA; DHLAG; HLADG; protein 41
ILMN_1806165	NM_002155.3	HSPA6	3310		-1.0864	0.139038	0.237192	0.224531	1.71328e-13	2.50086e-11	-0.672265	0.150193	0.326187	0.312149	1.17561e-05	0.00111645	heat shock 70kDa protein 6 (HSP70B') (HSPA6), mRNA.
ILMN_1769556	NM_024563.3	C5orf23	79614	NPR3	-0.785347	0.10052	0.23716	0.224498	1.72209e-13	2.50599e-11	-0.442451	0.117261	0.310822	0.296464	0.000203094	0.00862996	chromosome 5 open reading frame 23 (C5orf23), mRNA.	FLJ14054
ILMN_1755123	NM_001005742.1	GBA	2629		-3.22561	0.415975	0.234851	0.222152	2.49273e-13	3.51915e-11	-2.11868	0.428246	0.337503	0.323701	1.41596e-06	0.000244403	glucosidase, beta; acid (includes glucosylceramidase) (GBA), transcript variant 3, mRNA.	GCB; GBA1; GLUC
ILMN_1662026	NM_000061.1	BTK	695	BTK	-2.30843	0.297918	0.234623	0.22192	2.58537e-13	3.62164e-11	-1.5968	0.296473	0.348666	0.335096	1.71624e-07	5.59778e-05	Bruton agammaglobulinemia tyrosine kinase (BTK), mRNA.	MGC126261; ATK; XLA; IMD1; AT; BPK; AGMX1; PSCTK1; MGC126262
ILMN_1750101	NM_005620.1	S100A11	6282	S100A11	-1.42502	0.183903	0.234631	0.221928	2.58219e-13	3.62164e-11	-0.847859	0.203417	0.319218	0.305035	4.29091e-05	0.00290737	S100 calcium binding protein A11 (S100A11), mRNA.	S100C; MLN70
ILMN_1672547	NM_004145.2	MYO9B	4650	MYO9B	-2.38224	0.307592	0.234476	0.22177	2.64717e-13	3.69307e-11	-1.46444	0.331737	0.324766	0.310699	1.53144e-05	0.00133631	myosin IXB (MYO9B), mRNA.	MYR5; CELIAC4
ILMN_3219806	XR_016363.2	LOC643384	643384	UNC93B1	-1.69201	0.218643	0.234234	0.221524	2.75148e-13	3.81609e-11	-1.02709	0.237904	0.32255	0.308436	2.31208e-05	0.0018255	PREDICTED: hypothetical LOC643384 (LOC643384), mRNA.
ILMN_1712389	NM_001040138.1	CKLF	51192	CKLF-CMTM1,CKLF	-1.94352	0.251182	0.234188	0.221477	2.77179e-13	3.83301e-11	-1.15048	0.27858	0.318377	0.304177	5.01492e-05	0.00326239	chemokine-like factor (CKLF), transcript variant 5, mRNA.	UCK-1; CKLF1; CKLF4; CKLF2; CKLF3; C32; HSPC224
ILMN_1696463	NM_001080547.1	SPI1	6688	SPI1	-1.18598	0.153492	0.233761	0.221044	2.96736e-13	4.06006e-11	-0.737753	0.163831	0.326817	0.312793	1.04533e-05	0.00103631	spleen focus forming virus (SFFV) proviral integration oncogene spi1 (SPI1), transcript variant 1, mRNA.	SPI-A; OF; SFPI1; PU.1; SPI-1
ILMN_1667081	NM_001759.2	CCND2	894	CCND2	-0.778959	0.100817	0.233755	0.221037	2.97031e-13	4.06006e-11	-0.541773	0.0998897	0.349651	0.336102	1.42271e-07	4.77203e-05	cyclin D2 (CCND2), mRNA.	KIAK0002; MGC102758
ILMN_1678757	NR_001568.1	BCYRN1	618	BCYRN1	-0.84494	0.109366	0.233729	0.221011	2.98281e-13	4.06539e-11	-0.556461	0.112182	0.337825	0.32403	1.33262e-06	0.000233237	brain cytoplasmic RNA 1 (non-protein coding) (BCYRN1), non-coding RNA.	BC200a; BC200
ILMN_1789136	NM_001018108.2	SERF2	10169		-2.29124	0.296852	0.233438	0.220715	3.12455e-13	4.2177e-11	-1.61421	0.291766	0.352517	0.339028	8.23709e-08	3.41724e-05	small EDRK-rich factor 2 (SERF2), mRNA.	4F5REL; H4F5rel; FLJ37527; FLJ38557; FAM2C; MGC48826; HsT17089; FLJ20431
ILMN_2389501	NM_181755.1	HSD11B1	3290	HSD11B1	-0.585484	0.0758644	0.233401	0.220677	3.14342e-13	4.22344e-11	-0.346342	0.083992	0.318239	0.304036	5.14458e-05	0.00332388	hydroxysteroid (11-beta) dehydrogenase 1 (HSD11B1), transcript variant 2, mRNA.	MGC13539; HSD11B; HDL; HSD11L; HSD11; 11-beta-HSD1; 11-DH
ILMN_1756910	NM_012320.3	PLA2G15	23659	PLA2G15	-2.3335	0.302583	0.233182	0.220454	3.25534e-13	4.36142e-11	-1.4942	0.31604	0.332141	0.318227	3.86993e-06	0.000492002	phospholipase A2, group XV (PLA2G15), mRNA.	DKFZp564A0122; ACS; LPLA2; LLPL
ILMN_2234016	NR_002202.2	FTHL7	2500	FTH1	-2.21739	0.287592	0.233113	0.220385	3.29118e-13	4.38936e-11	-1.40216	0.302974	0.329753	0.31579	6.04628e-06	0.000688023	ferritin, heavy polypeptide-like 7 (FTHL7) on chromosome 13.
ILMN_1676213	NM_014467.2	SRPX2	27286	SRPX2	-0.851437	0.110453	0.23305	0.22032	3.32458e-13	4.41665e-11	-0.531853	0.117357	0.327489	0.313479	9.22301e-06	0.00093805	sushi-repeat-containing protein, X-linked 2 (SRPX2), mRNA.	SRPUL; RESDX
ILMN_1814823	NM_000146.3	FTL	2512	FTL	-3.27914	0.425501	0.23297	0.220239	3.36727e-13	4.4391e-11	-2.1303	0.439899	0.334926	0.321071	2.29671e-06	0.000340504	ferritin, light polypeptide (FTL), mRNA.	MGC71996
ILMN_1797875	NM_001629.2	ALOX5AP	241	ALOX5AP	-0.965345	0.125265	0.232965	0.220235	3.36964e-13	4.4391e-11	-0.639238	0.127873	0.338787	0.325012	1.11199e-06	0.000204162	arachidonate 5-lipoxygenase-activating protein (ALOX5AP), mRNA.	FLAP
ILMN_2379130	NM_001025243.1	IRAK1	3654	IRAK1	-1.65219	0.214935	0.232198	0.219454	3.8088e-13	4.97642e-11	-1.02244	0.229463	0.325718	0.31167	1.28283e-05	0.00119195	interleukin-1 receptor-associated kinase 1 (IRAK1), transcript variant 3, mRNA.	IRAK; pelle
ILMN_1720484	NM_006371.3	CRTAP	10491	CRTAP	-1.41482	0.184055	0.232197	0.219454	3.80908e-13	4.97642e-11	-0.886764	0.194738	0.327998	0.313998	8.38851e-06	0.000881614	cartilage associated protein (CRTAP), mRNA.	CASP; OI7
ILMN_1695711	NM_019018.1	FAM105A	54491	FAM105A	-3.86625	0.503012	0.232169	0.219424	3.82656e-13	4.98548e-11	-2.41777	0.533019	0.327584	0.313576	9.06119e-06	0.000930189	family with sequence similarity 105, member A (FAM105A), mRNA.	FLJ11127
ILMN_1711566	NM_003254.2	TIMP1	7076	TIMP1	-1.03972	0.135427	0.23182	0.219071	4.04498e-13	5.22686e-11	-0.658098	0.142206	0.329748	0.315785	6.05188e-06	0.000688023	TIMP metallopeptidase inhibitor 1 (TIMP1), mRNA.	TIMP; FLJ90373; CLGI; EPA; EPO; HCI
ILMN_1710740	NM_000063.3	C2	717	C2	-2.35481	0.306788	0.231755	0.219004	4.08735e-13	5.2595e-11	-1.51206	0.318974	0.332442	0.318535	3.65757e-06	0.000471547	complement component 2 (C2), mRNA.	CO2; DKFZp779M0311
ILMN_1701195	NM_005084.2	PLA2G7	7941	PLA2G7	-0.651019	0.0848181	0.231747	0.218996	4.09248e-13	5.2595e-11	-0.418703	0.0880907	0.332748	0.318847	3.45394e-06	0.000456287	phospholipase A2, group VII (platelet-activating factor acetylhydrolase, plasma) (PLA2G7), mRNA.	PAFAH; LDL-PLA2
ILMN_1684887	NM_022136.3	SAMSN1	64092	SAMSN1	-2.72565	0.355167	0.2317	0.218948	4.12345e-13	5.28495e-11	-1.82046	0.359877	0.340278	0.326534	8.39724e-07	0.000166865	SAM domain, SH3 domain and nuclear localization signals 1 (SAMSN1), mRNA.	NASH1; HACS1; SASH2; SH3D6B
ILMN_1705302	NM_004107.3	FCGRT	2217	FCGRT	-1.77921	0.231891	0.231635	0.218882	4.16644e-13	5.31207e-11	-1.13564	0.242024	0.331286	0.317354	4.54108e-06	0.000552996	Fc fragment of IgG, receptor, transporter, alpha (FCGRT), transcript variant 1, mRNA.	alpha-chain; FCRN
ILMN_1731862	NM_030569.4	ITIH5	80760	ITIH5	-1.51973	0.198072	0.231634	0.218881	4.16708e-13	5.31207e-11	-1.00112	0.202455	0.337442	0.323639	1.43217e-06	0.000245409	inter-alpha (globulin) inhibitor H5 (ITIH5), transcript variant 1, mRNA.	DKFZp686F0145; pp14776; MGC10848
ILMN_1703650	NM_006058.3	TNIP1	10318	TNIP1	-1.32253	0.172515	0.231382	0.218625	4.3374e-13	5.51433e-11	-0.833188	0.181574	0.328823	0.314841	7.192e-06	0.000785539	TNFAIP3 interacting protein 1 (TNIP1), mRNA.	KIAA0113; NAF1; ABIN-1; VAN
ILMN_1730670	NM_005860.2	FSTL3	10272	FSTL3	-1.06511	0.138999	0.231247	0.218487	4.43217e-13	5.61971e-11	-0.681627	0.144711	0.331717	0.317795	4.18898e-06	0.000521351	follistatin-like 3 (secreted glycoprotein) (FSTL3), mRNA.	FLRG; FSRP
ILMN_1751234	NM_152692.3	C1GALT1C1	29071	C1GALT1C1	-2.77358	0.362397	0.230881	0.218116	4.69797e-13	5.9408e-11	-1.70672	0.387287	0.324591	0.31052	1.58197e-05	0.0013728	C1GALT1-specific chaperone 1 (C1GALT1C1), transcript variant 1, mRNA.	MGC19947; C1GALT2; HSPC067; C1Gal-T2; COSMC; c38h2-l1
ILMN_1807969	NM_005460.2	SNCAIP	9627	SNCAIP	-2.22	0.290334	0.230603	0.217833	4.91068e-13	6.19322e-11	-1.39538	0.305578	0.328297	0.314304	7.93338e-06	0.000847121	synuclein, alpha interacting protein (SNCAIP), mRNA.	MGC39814; SYPH1
ILMN_1804530	XM_936251.2	LOC653888	653888	ARPC1B	-1.7675	0.231311	0.230402	0.217628	5.07048e-13	6.344e-11	-1.24755	0.226383	0.351941	0.33844	9.19464e-08	3.71668e-05	PREDICTED: similar to Actin-related protein 2/3 complex subunit 1B (ARP2/3 complex 41 kDa subunit) (p41-ARC) (LOC653888), mRNA.
ILMN_1717334	NM_005428.2	VAV1	7409	VAV1	-4.02588	0.527307	0.230148	0.217371	5.27906e-13	6.58754e-11	-2.63041	0.540534	0.335505	0.321661	2.06065e-06	0.000313656	vav 1 guanine nucleotide exchange factor (VAV1), mRNA.	VAV
ILMN_1729123	NM_021131.3	PPP2R4	5524	PPP2R4	-2.80072	0.367106	0.229928	0.217147	5.4673e-13	6.78663e-11	-1.73175	0.390183	0.325315	0.311259	1.38284e-05	0.00123164	protein phosphatase 2A activator, regulatory subunit 4 (PPP2R4), transcript variant 3, mRNA.	PR53; PTPA; MGC2184; PP2A
ILMN_1734543	NM_130435.2	PTPRE	5791	PTPRE	-1.80566	0.236703	0.229896	0.217114	5.49545e-13	6.79011e-11	-1.15806	0.24547	0.331896	0.317977	4.0511e-06	0.000510914	protein tyrosine phosphatase, receptor type, E (PTPRE), transcript variant 2, mRNA.	DKFZp313F1310; PTPE; HPTPE; R-PTP-EPSILON
ILMN_3239531	NM_001141936.1	C4orf48	401115	C4orf48	-3.52901	0.463104	0.229581	0.216794	5.77748e-13	7.09715e-11	-2.39388	0.463425	0.342987	0.329299	5.0368e-07	0.000122046	chromosome 4 open reading frame 48 (C4orf48), mRNA.
ILMN_1712532	NM_052813.3	CARD9	64170	CARD9	-2.67088	0.350561	0.229523	0.216735	5.83091e-13	7.14422e-11	-1.69831	0.365354	0.330238	0.316285	5.52288e-06	0.000643348	caspase recruitment domain family, member 9 (CARD9), mRNA.	hCARD9
ILMN_1668312	NM_001001290.1	SLC2A9	56606	SLC2A9	-5.23595	0.687905	0.229231	0.216439	6.10782e-13	7.46417e-11	-3.4669	0.69827	0.33794	0.324147	1.3041e-06	0.000231865	solute carrier family 2 (facilitated glucose transporter), member 9 (SLC2A9), transcript variant 2, mRNA.	GLUTX; GLUT9
ILMN_1724066	NM_004573.2	PLCB2	5330	PLCB2	-1.69964	0.223538	0.228915	0.216117	6.42311e-13	7.80536e-11	-1.06532	0.23492	0.327558	0.313549	9.10639e-06	0.000930189	phospholipase C, beta 2 (PLCB2), mRNA.	FLJ38135
ILMN_1677440	NM_005765.2	ATP6AP2	10159	ATP6AP2	-2.22879	0.293526	0.228515	0.21571	6.84426e-13	8.21736e-11	-1.34808	0.315719	0.321483	0.307347	2.81883e-05	0.00210939	ATPase, H+ transporting, lysosomal accessory protein 2 (ATP6AP2), mRNA.	ELDF10; APT6M8-9; MGC99577; XMRE; M8-9; ATP6IP2; MSTP009; MRXE; HT028; ATP6M8-9
ILMN_1677814	NM_003786.2	ABCC3	8714	ABCC3	-0.990076	0.130391	0.228513	0.215709	6.84577e-13	8.21736e-11	-0.628688	0.135759	0.329822	0.31586	5.96858e-06	0.000681831	ATP-binding cassette, sub-family C (CFTR/MRP), member 3 (ABCC3), mRNA.	cMOAT2; MRP3; MLP2; ABC31; MOAT-D; EST90757
ILMN_1676361	NM_021226.2	ARHGAP22	58504	ARHGAP22	-3.22438	0.424725	0.228456	0.21565	6.90873e-13	8.27194e-11	-2.09092	0.436252	0.333713	0.319832	2.883e-06	0.000397133	Rho GTPase activating protein 22 (ARHGAP22), mRNA.	RhoGAP2
ILMN_1715662	NM_199511.1	CCDC80	151887	CCDC80	-2.30158	0.303345	0.228286	0.215477	7.09759e-13	8.434e-11	-1.64238	0.294473	0.353706	0.340242	6.5627e-08	3.0429e-05	coiled-coil domain containing 80 (CCDC80), transcript variant 1, mRNA.	URB; DRO1; okuribin; MGC131805; MGC134851; SSG1
ILMN_1688780	NM_019554.2	S100A4	6275	S100A4	-1.04473	0.137693	0.228288	0.21548	7.09499e-13	8.434e-11	-0.671746	0.142154	0.332083	0.318168	3.91189e-06	0.000496002	S100 calcium binding protein A4 (S100A4), transcript variant 2, mRNA.	FSP1; MTS1; 18A2; PEL98; P9KA; CAPL; 42A
ILMN_1724533	NM_015364.2	LY96	23643	LY96	-1.22943	0.162168	0.228047	0.215234	7.37199e-13	8.73811e-11	-0.741585	0.174563	0.320998	0.306852	3.0843e-05	0.0022721	lymphocyte antigen 96 (LY96), mRNA.	MD-2
ILMN_2333670	NM_198235.1	RNASE1	6035	RNASE1	-1.17426	0.154919	0.227991	0.215177	7.43786e-13	8.79416e-11	-0.735442	0.16259	0.327287	0.313272	9.57705e-06	0.00096575	ribonuclease, RNase A family, 1 (pancreatic) (RNASE1), transcript variant 1, mRNA.	MGC12408; RNS1; RIB1
ILMN_1720113	NM_030667.1	PTPRO	5800	PTPRO	-2.58176	0.34082	0.227807	0.21499	7.65819e-13	9.00961e-11	-1.63315	0.35526	0.329021	0.315042	6.93182e-06	0.000767759	protein tyrosine phosphatase, receptor type, O (PTPRO), transcript variant 1, mRNA.	GLEPP1; PTP-U2; PTPU2
ILMN_1688295	NM_016423.1	ZNF219	51222	ZNF219	-1.29917	0.171631	0.227588	0.214768	7.92861e-13	9.30461e-11	-0.798427	0.182245	0.324	0.309917	1.7658e-05	0.00149128	zinc finger protein 219 (ZNF219), mRNA.	ZFP219
ILMN_1708107	NM_001937.3	DPT	1805	DPT	-0.516503	0.0683028	0.227291	0.214466	8.31131e-13	9.70556e-11	-0.33345	0.0702164	0.332647	0.318744	3.52019e-06	0.000459901	dermatopontin (DPT), mRNA.	TRAMP
ILMN_2109708	NM_001953.2	ECGF1	1890	TYMP	-1.02328	0.135826	0.226184	0.213341	9.90474e-13	1.14812e-10	-0.626527	0.144144	0.323214	0.309114	2.04372e-05	0.00167514	endothelial cell growth factor 1 (platelet-derived) (ECGF1), mRNA.	TP; PDECGF; hPD-ECGF; MNGIE
ILMN_1690939	NM_001953.2	ECGF1	1890	TYMP	-2.81847	0.374641	0.22577	0.212919	1.05765e-12	1.21704e-10	-1.90575	0.37377	0.34129	0.327567	6.93859e-07	0.000147817	endothelial cell growth factor 1 (platelet-derived) (ECGF1), mRNA.	TP; PDECGF; hPD-ECGF; MNGIE
ILMN_1698732	NM_016081.3	PALLD	23022	PALLD	-1.08765	0.144593	0.225733	0.212882	1.06381e-12	1.22116e-10	-0.645688	0.156449	0.318319	0.304117	5.06915e-05	0.00328862	palladin, cytoskeletal associated protein (PALLD), transcript variant 2, mRNA.	CGI-151; PNCA1; KIAA0992; FLJ22190; SIH002; FLJ38193; FLJ39139
ILMN_1729596	NM_032714.1	INF2	64423	INF2	-2.80154	0.372783	0.22546	0.212605	1.11077e-12	1.26585e-10	-1.8938	0.371825	0.341153	0.327427	7.12112e-07	0.000150415	inverted formin, FH2 and WH2 domain containing (INF2), transcript variant 3, mRNA.	MGC13251
ILMN_1799614	NM_006702.3	PNPLA6	10908	PNPLA6	-2.44718	0.32685	0.224363	0.21149	1.32107e-12	1.48421e-10	-1.58251	0.334059	0.332366	0.318457	3.71042e-06	0.000476849	patatin-like phospholipase domain containing 6 (PNPLA6), mRNA.	sws; NTE
ILMN_1696911	NR_002203.1	FTHL8	2501	FTH1	-0.934783	0.124852	0.224363	0.211489	1.32121e-12	1.48421e-10	-0.556771	0.134348	0.318694	0.3045	4.7291e-05	0.00313194	ferritin, heavy polypeptide-like 8 (FTHL8) on chromosome X.
ILMN_1717056	NM_001093771.1	TXNRD1	7296	TXNRD1	-2.44074	0.326268	0.224114	0.211236	1.3742e-12	1.53862e-10	-1.59299	0.331512	0.334013	0.320138	2.72577e-06	0.000385965	thioredoxin reductase 1 (TXNRD1), transcript variant 5, mRNA.	MGC9145; TR; TXNR; GRIM-12; TRXR1; TR1
ILMN_1677404	NM_021033.5	RAP2A	5911	RAP2A	-2.07155	0.277433	0.22357	0.210683	1.49753e-12	1.67038e-10	-1.08264	0.324996	0.302203	0.287666	0.00100099	0.0267566	RAP2A, member of RAS oncogene family (RAP2A), mRNA.	RAP2; K-REV; KREV; RbBP-30
ILMN_1701613	NM_004585.3	RARRES3	5920	RARRES3	-1.45321	0.194721	0.22342	0.210531	1.53324e-12	1.70619e-10	-0.896739	0.204444	0.324119	0.310038	1.7273e-05	0.00146137	retinoic acid receptor responder (tazarotene induced) 3 (RARRES3), mRNA.	MGC8906; HRASLS4; TIG3; RIG1
ILMN_1730816	NM_019858.1	GPR162	27239	GPR162	-2.12424	0.284738	0.223314	0.210423	1.55926e-12	1.73108e-10	-1.4123	0.285902	0.337316	0.32351	1.46654e-06	0.000249101	G protein-coupled receptor 162 (GPR162), transcript variant A-2, mRNA.	GRCA; A-2
ILMN_1669273	NM_000310.2	PPT1	5538	PPT1	-1.76585	0.236926	0.223035	0.210139	1.62945e-12	1.80476e-10	-1.04692	0.254901	0.317883	0.303672	5.49615e-05	0.0034656	palmitoyl-protein thioesterase 1 (ceroid-lipofuscinosis, neuronal 1, infantile) (PPT1), mRNA.	CLN1; INCL; PPT
ILMN_1680314	NM_003329.2	TXN	7295	TXN	-1.55566	0.208786	0.22295	0.210053	1.65144e-12	1.82058e-10	-0.913508	0.225965	0.316484	0.302244	7.12153e-05	0.00412752	thioredoxin (TXN), mRNA.	DKFZp686B1993; TRX; MGC61975
ILMN_1798528	NM_177528.1	SULT1A2	6799	SULT1A2	-2.17527	0.292263	0.222632	0.209729	1.73639e-12	1.90535e-10	-1.35391	0.304766	0.325411	0.311357	1.35831e-05	0.00122031	sulfotransferase family, cytosolic, 1A, phenol-preferring, member 2 (SULT1A2), transcript variant 2, mRNA.	MGC142287; MGC142289; ST1A2; TSPST2; P-PST; STP2; HAST4
ILMN_1676663	NM_002546.3	TNFRSF11B	4982	TNFRSF11B	-1.6185	0.217642	0.222384	0.209478	1.80551e-12	1.97662e-10	-0.913556	0.24129	0.311086	0.296734	0.0001934	0.00833606	tumor necrosis factor receptor superfamily, member 11b (TNFRSF11B), mRNA.	MGC29565; OCIF; OPG; TR1
ILMN_1652787	NM_152309.2	PIK3AP1	118788	PIK3AP1	-2.63156	0.354073	0.222218	0.209308	1.85351e-12	2.01517e-10	-1.68978	0.362145	0.330658	0.316714	5.10566e-06	0.000606701	phosphoinositide-3-kinase adaptor protein 1 (PIK3AP1), mRNA.	BCAP; RP11-34E5.3
ILMN_1773389	NM_182676.1	PLTP	5360	PLTP	-0.89097	0.119928	0.222099	0.209187	1.88858e-12	2.04859e-10	-0.538571	0.127191	0.320688	0.306535	3.26699e-05	0.00237706	phospholipid transfer protein (PLTP), transcript variant 2, mRNA.	HDLCQ9
ILMN_1803392	NM_014604.2	TAX1BP3	30851	P2RX5-TAX1BP3,TAX1BP3	-1.6299	0.219651	0.221755	0.208838	1.99371e-12	2.14785e-10	-0.970918	0.234907	0.318451	0.304253	4.94621e-05	0.00323549	Tax1 (human T-cell leukemia virus type I) binding protein 3 (TAX1BP3), mRNA.	TIP-1
ILMN_1735453	NM_015475.3	FAM98A	25940	FAM98A	-1.66718	0.224835	0.22155	0.208629	2.05924e-12	2.20838e-10	-1.04681	0.232755	0.326686	0.312659	1.07126e-05	0.00104895	family with sequence similarity 98, member A (FAM98A), mRNA.	DKFZp686O03192; DKFZP564F0522
ILMN_2052891	NM_000297.2	PKD2	5311	PKD2	-1.73392	0.233861	0.221517	0.208597	2.06969e-12	2.20957e-10	-0.992476	0.256332	0.312859	0.298544	0.000139314	0.0067232	polycystic kidney disease 2 (autosomal dominant) (PKD2), mRNA.	PC2; PKD4; APKD2; MGC138468; MGC138466
ILMN_1741003	NM_001154.2	ANXA5	308	ANXA5	-1.37573	0.185544	0.221528	0.208608	2.0661e-12	2.20957e-10	-0.957055	0.181364	0.345839	0.33221	2.93552e-07	8.41408e-05	annexin A5 (ANXA5), mRNA.	PP4; ANX5; ENX2
ILMN_1659753	NM_013995.1	LAMP2	3920	LAMP2	-2.02277	0.272911	0.221421	0.208499	2.10123e-12	2.23819e-10	-1.54566	0.25482	0.366981	0.353793	5.07485e-09	4.52849e-06	lysosomal-associated membrane protein 2 (LAMP2), transcript variant LAMP2B, mRNA.	LAMPB; CD107b; LAMP-2C
ILMN_1811890	NM_002925.3	RGS10	6001	RGS10	-2.61542	0.352982	0.22133	0.208406	2.13169e-12	2.25036e-10	-1.76501	0.350591	0.339672	0.325915	9.4143e-07	0.000184747	regulator of G-protein signaling 10 (RGS10), transcript variant 2, mRNA.
ILMN_2038776	NM_003329.2	TXN	7295	TXN	-1.50801	0.203505	0.221358	0.208434	2.12245e-12	2.25036e-10	-0.909711	0.215756	0.320288	0.306127	3.51872e-05	0.00251381	thioredoxin (TXN), mRNA.	DKFZp686B1993; TRX; MGC61975
ILMN_1767816	NM_031301.2	APH1B	83464	APH1B	-2.61135	0.352504	0.221272	0.208347	2.15121e-12	2.26591e-10	-1.68683	0.358759	0.331515	0.317588	4.35035e-06	0.000534404	anterior pharynx defective 1 homolog B (C. elegans) (APH1B), mRNA.	PRO1328; TAAV688; APH-1B; DKFZp564D0372; PSFL
ILMN_1800739	NM_021102.2	SPINT2	10653	SPINT2	-2.06783	0.279248	0.221155	0.208228	2.1913e-12	2.2979e-10	-1.42402	0.274307	0.343642	0.329968	4.44958e-07	0.000111935	serine peptidase inhibitor, Kunitz type, 2 (SPINT2), mRNA.	Kop; PB; HAI-2; HAI2
ILMN_1812091	NM_017565.2	FAM20A	54757	FAM20A	-4.32182	0.584548	0.220704	0.207769	2.35251e-12	2.45606e-10	-3.09284	0.562761	0.351546	0.338037	9.91436e-08	3.90741e-05	family with sequence similarity 20, member A (FAM20A), mRNA.	DKFZp434F2322; FP2747
ILMN_3223126	NM_001113756.1	TYMP	1890	TYMP	-1.89797	0.25704	0.220335	0.207395	2.49286e-12	2.56857e-10	-1.21283	0.262838	0.32943	0.31546	6.42237e-06	0.000722008	thymidine phosphorylase (TYMP), transcript variant 3, mRNA.	TP; ECGF1; PDECGF; hPD-ECGF; MNGIE
ILMN_1807873	NM_152233.2	SNX6	58533	SNX6	-2.88413	0.391317	0.219803	0.206854	2.71045e-12	2.77438e-10	-1.91865	0.390949	0.336522	0.322699	1.70246e-06	0.000278021	sorting nexin 6 (SNX6), transcript variant 2, mRNA.	MSTP010; MGC3157; TFAF2
ILMN_2370208	NM_001048251.1	CMTM3	123920	CMTM3	-1.91761	0.260316	0.219654	0.206702	2.77491e-12	2.81697e-10	-1.13403	0.278306	0.317178	0.302952	6.26321e-05	0.00378304	CKLF-like MARVEL transmembrane domain containing 3 (CMTM3), transcript variant 5, mRNA.	BNAS2; MGC51956; CKLFSF3; FLJ31762
ILMN_1669831	NM_052831.2	C6orf192	116843	C6orf192	-1.82674	0.247981	0.219652	0.2067	2.77564e-12	2.81697e-10	-1.17722	0.252088	0.330751	0.316808	5.01841e-06	0.000597836	chromosome 6 open reading frame 192 (C6orf192), mRNA.	dJ55C23.6
ILMN_1759326	NM_002562.4	P2RX7	5027	P2RX7	-2.43485	0.330566	0.219624	0.206672	2.7879e-12	2.82336e-10	-1.44358	0.352845	0.317536	0.303318	5.86121e-05	0.00360745	purinergic receptor P2X, ligand-gated ion channel, 7 (P2RX7), mRNA.	MGC20089; P2X7
ILMN_1809957	NM_004069.3	AP2S1	1175	AP2S1	-2.26864	0.308153	0.219481	0.206527	2.85099e-12	2.85667e-10	-1.58372	0.300049	0.34587	0.332243	2.91795e-07	8.41408e-05	adaptor-related protein complex 2, sigma 1 subunit (AP2S1), transcript variant AP17, mRNA.	AP17; CLAPS2; AP17-DELTA
ILMN_2070521	NM_017614.3	BHMT2	23743	BHMT2	-1.29121	0.175367	0.219514	0.20656	2.8365e-12	2.85667e-10	-0.768679	0.186677	0.318112	0.303906	5.26723e-05	0.00337545	betaine-homocysteine methyltransferase 2 (BHMT2), mRNA.	FLJ20001
ILMN_2389506	NM_181755.1	HSD11B1	3290	HSD11B1	-0.59121	0.0803822	0.219206	0.206247	2.97684e-12	2.9577e-10	-0.337235	0.0877584	0.312254	0.297926	0.000155808	0.00718485	hydroxysteroid (11-beta) dehydrogenase 1 (HSD11B1), transcript variant 2, mRNA.	MGC13539; HSD11B; HDL; HSD11L; HSD11; 11-beta-HSD1; 11-DH
ILMN_1767900	NM_018176.2	LGI2	55203	LGI2	-2.9321	0.398732	0.21915	0.20619	3.00318e-12	2.97762e-10	-1.91177	0.402402	0.332696	0.318794	3.48815e-06	0.000458247	leucine-rich repeat LGI family, member 2 (LGI2), mRNA.	KIAA1916; MGC126808; MGC126810; FLJ10675; LGIL2
ILMN_2366388	NM_181696.1	PRDX1	5052	PRDX1	-2.24014	0.305254	0.218569	0.205599	3.29037e-12	3.23692e-10	-1.4383	0.310433	0.329877	0.315916	5.90813e-06	0.000676559	peroxiredoxin 1 (PRDX1), transcript variant 2, mRNA.	MSP23; PAG; PAGB; PAGA; PRX1; NKEFA; TDPX2
ILMN_3306730	NM_019027.3	RBM47	54502	RBM47	-1.52274	0.2075	0.218565	0.205595	3.29209e-12	3.23692e-10	-0.880906	0.224242	0.314045	0.299755	0.000111855	0.00572863	RNA binding motif protein 47 (RBM47), transcript variant 2, mRNA.	DKFZp686F02235; FLJ21344; FLJ20273; FLJ21643
ILMN_1746525	NR_002200.1	FTHL2	2497	FTH1	-1.09329	0.149063	0.218406	0.205433	3.37548e-12	3.31204e-10	-0.65956	0.157055	0.319914	0.305745	3.77139e-05	0.00264361	ferritin, heavy polypeptide-like 2 (FTHL2) on chromosome 1.
ILMN_2119297	NM_015589.3	SAMD4A	23034	SAMD4A	-3.86001	0.52644	0.218323	0.205349	3.41963e-12	3.34044e-10	-2.68596	0.512839	0.344821	0.331172	3.55953e-07	9.70861e-05	sterile alpha motif domain containing 4A (SAMD4A), mRNA.	SMGA; SMG; SAMD4; Smaug; KIAA1053; DKFZp434H0350; Smaug1
ILMN_1785356	NM_015213.2	DENND5A	23258	DENND5A	-2.70943	0.369535	0.218312	0.205338	3.42562e-12	3.34044e-10	-1.6694	0.38452	0.3231	0.308998	2.08759e-05	0.0016974	DENN/MADD domain containing 5A (DENND5A), mRNA.	FLJ33829; FLJ22354; FLJ43455; KIAA1091
ILMN_1680367	NM_001004298.2	C10orf90	118611	C10orf90	-4.24725	0.579537	0.218183	0.205207	3.49541e-12	3.38754e-10	-2.73892	0.587599	0.330543	0.316596	5.2169e-06	0.000616821	chromosome 10 open reading frame 90 (C10orf90), mRNA.	RP11-422P15.2; bA422P15.2; FLJ32938
ILMN_2323944	NM_001042353.1	FAM110A	83541	FAM110A	-3.46459	0.472859	0.218114	0.205136	3.53385e-12	3.41779e-10	-2.18187	0.485764	0.326549	0.312519	1.09883e-05	0.00106274	family with sequence similarity 110, member A (FAM110A), transcript variant 3, mRNA.	MGC4675; FAM110A; bA371L19.3; F10; C20orf55; MGC2450
ILMN_1717326	NM_018344.3	SLC29A3	55315	SLC29A3	-2.21887	0.303026	0.217938	0.204957	3.63285e-12	3.50636e-10	-1.50193	0.299271	0.339277	0.325512	1.01401e-06	0.000194946	solute carrier family 29 (nucleoside transporters), member 3 (SLC29A3), mRNA.	FLJ11160; ENT3
ILMN_1707084	NM_015983.2	UBE2D4	51619	UBE2D4	-1.78077	0.243345	0.217763	0.20478	3.73359e-12	3.59626e-10	-1.18758	0.242158	0.336436	0.322611	1.73024e-06	0.000281202	ubiquitin-conjugating enzyme E2D 4 (putative) (UBE2D4), mRNA.	HBUCE1
ILMN_2173835	NR_002201.1	FTHL3	2498	FTH1P3	-1.1066	0.151301	0.21761	0.204624	3.82416e-12	3.67601e-10	-0.668885	0.158974	0.320091	0.305926	3.64979e-05	0.00258403	ferritin, heavy polypeptide-like 3 (FTHL3), non-coding RNA.
ILMN_1772359	NM_006762.1	LAPTM5	7805	LAPTM5	-0.973775	0.13319	0.217502	0.204514	3.88973e-12	3.73146e-10	-0.601741	0.138153	0.32342	0.309325	1.96678e-05	0.00162617	lysosomal multispanning membrane protein 5 (LAPTM5), mRNA.	MGC125860; MGC125861
ILMN_1777721	NM_012325.1	MAPRE1	22919	MAPRE1	-2.46689	0.338109	0.216918	0.203921	4.26235e-12	4.06419e-10	-1.46811	0.357958	0.317755	0.303542	5.62723e-05	0.00351801	microtubule-associated protein, RP/EB family, member 1 (MAPRE1), mRNA.	EB1; MGC129946; MGC117374
ILMN_1733579	NM_014210.2	EVI2A	2123	EVI2A	-1.53268	0.210176	0.216772	0.203772	4.36106e-12	4.14994e-10	-0.953235	0.216931	0.324301	0.310224	1.66992e-05	0.00142816	ecotropic viral integration site 2A (EVI2A), transcript variant 2, mRNA.	EVI2; EVDA
ILMN_1809850	NM_020650.2	RCN3	57333	RCN3	-2.69463	0.370263	0.2162	0.203191	4.76973e-12	4.48468e-10	-1.78716	0.368787	0.335008	0.321154	2.26171e-06	0.000336369	reticulocalbin 3, EF-hand calcium binding domain (RCN3), mRNA.	RLP49
ILMN_1774874	NM_173843.1	IL1RN	3557	IL1RN	-0.855432	0.117611	0.216037	0.203025	4.8928e-12	4.59127e-10	-0.554265	0.118565	0.330868	0.316927	4.91008e-06	0.000586408	interleukin 1 receptor antagonist (IL1RN), transcript variant 4, mRNA.	ICIL-1RA; IRAP; IL-1ra3; MGC10430; IL1F3; IL1RA
ILMN_1684306	NM_019554.2	S100A4	6275	S100A4	-0.941586	0.129581	0.215764	0.202748	5.1059e-12	4.78175e-10	-0.596168	0.13221	0.32696	0.312938	1.01798e-05	0.00101143	S100 calcium binding protein A4 (S100A4), transcript variant 2, mRNA.	FSP1; MTS1; 18A2; PEL98; P9KA; CAPL; 42A
ILMN_1728662	NM_000694.2	ALDH3B1	221	ALDH3B1	-2.18005	0.300088	0.215698	0.202681	5.15925e-12	4.82216e-10	-1.2285	0.327023	0.310483	0.296118	0.000216233	0.00906606	aldehyde dehydrogenase 3 family, member B1 (ALDH3B1), transcript variant 1, mRNA.	FLJ26433; ALDH7; ALDH4
ILMN_1807277	NM_006332.3	IFI30	10437	IFI30	-0.897169	0.123567	0.215538	0.202518	5.28969e-12	4.93433e-10	-0.556764	0.127418	0.323739	0.30965	1.85385e-05	0.00155178	interferon, gamma-inducible protein 30 (IFI30), mRNA.	MGC32056; IP30; GILT; IFI-30
ILMN_1685714	NM_002193.1	INHBB	3625	INHBB	-1.29303	0.178336	0.215148	0.202122	5.62248e-12	5.20371e-10	-0.757765	0.18975	0.315428	0.301166	8.65991e-05	0.00474579	inhibin, beta B (activin AB beta polypeptide) (INHBB), mRNA.
ILMN_1756982	NM_001288.4	CLIC1	1192	CLIC1	-1.78832	0.246755	0.215025	0.201996	5.73208e-12	5.29479e-10	-1.08456	0.257464	0.320201	0.306038	3.57586e-05	0.00255078	chloride intracellular channel 1 (CLIC1), mRNA.	NCC27; G6
ILMN_3239031	NM_030786.2	SYNC	81493	SYNC	-3.54321	0.488981	0.214977	0.201948	5.77491e-12	5.32395e-10	-2.29452	0.492342	0.330524	0.316577	5.23512e-06	0.000617431	syncoilin, intermediate filament protein (SYNC), transcript variant 1, mRNA.	SYNC; MGC149626; SYNCOILIN; MGC149625
ILMN_1776181	NM_001165.3	BIRC3	330	BIRC3	-2.23951	0.309147	0.214902	0.201871	5.84308e-12	5.37632e-10	-1.41745	0.315046	0.326726	0.312699	1.06338e-05	0.00104511	baculoviral IAP repeat-containing 3 (BIRC3), transcript variant 1, mRNA.	RNF49; MALT2; MIHC; HAIP1; API2; HIAP1; AIP1; CIAP2
ILMN_2184184	NM_000700.1	ANXA1	301	ANXA1	-1.45083	0.200692	0.214319	0.201279	6.39986e-12	5.82067e-10	-0.93174	0.202764	0.328977	0.314997	6.98917e-06	0.000770503	annexin A1 (ANXA1), mRNA.	LPC1; ANX1
ILMN_1742705	NM_139177.2	SLC39A11	201266	SLC39A11	-2.19575	0.303761	0.214297	0.201256	6.42229e-12	5.82986e-10	-1.31403	0.318845	0.318189	0.303985	5.19271e-05	0.00334583	solute carrier family 39 (metal ion transporter), member 11 (SLC39A11), mRNA.	C17orf26
ILMN_2129505	NM_153611.3	CYBASC3	220002	CYBASC3	-1.64515	0.227787	0.214057	0.201012	6.66801e-12	6.02977e-10	-0.952395	0.243453	0.313701	0.299403	0.000119215	0.00599166	cytochrome b, ascorbate dependent 3 (CYBASC3), mRNA.	MGC20446
ILMN_1811370	NM_005525.2	HSD11B1	3290	HSD11B1	-0.580825	0.0804357	0.214004	0.200959	6.72274e-12	6.0561e-10	-0.323993	0.0877842	0.30915	0.294757	0.000276694	0.0108274	hydroxysteroid (11-beta) dehydrogenase 1 (HSD11B1), transcript variant 1, mRNA.	MGC13539; HSD11B; HDL; HSD11L; HSD11; 11-beta-HSD1; 11-DH
ILMN_1722981	NM_003268.4	TLR5	7100	TLR5	-2.52068	0.35016	0.213139	0.200079	7.69433e-12	6.7891e-10	-1.58972	0.356522	0.325792	0.311746	1.26522e-05	0.00118489	toll-like receptor 5 (TLR5), mRNA.	MGC126430; SLEB1; MGC126431; FLJ10052; TIL3
ILMN_1781290	NM_001664.2	RHOA	387	RHOA	-2.35876	0.327754	0.213066	0.200005	7.78247e-12	6.85408e-10	-1.34826	0.35199	0.311998	0.297665	0.000163367	0.00741839	ras homolog gene family, member A (RHOA), mRNA.	RHO12; RHOH12; ARHA; ARH12
ILMN_1657683	NM_032800.1	C1orf198	84886	C1orf198	-0.932219	0.129744	0.212613	0.199545	8.3519e-12	7.28773e-10	-0.558548	0.135644	0.318114	0.303908	5.26594e-05	0.00337545	chromosome 1 open reading frame 198 (C1orf198), mRNA.	FLJ14525; FLJ16283; DKFZp667D152; MGC10710; FLJ38847
ILMN_1811624	NM_022065.4	THADA	63892	THADA	-3.84845	0.536708	0.21205	0.198972	9.11802e-12	7.89794e-10	-2.68769	0.518764	0.343377	0.329697	4.67864e-07	0.000115849	thyroid adenoma associated (THADA), transcript variant 1, mRNA.	GITA; FLJ44016; KIAA1767; FLJ44876; FLJ21877; FLJ77530
ILMN_1733998	NM_005771.3	DHRS9	10170	DHRS9	-0.690185	0.0963256	0.211843	0.198762	9.41634e-12	8.11178e-10	-0.440196	0.0973126	0.327293	0.313278	9.56695e-06	0.00096575	dehydrogenase/reductase (SDR family) member 9 (DHRS9), transcript variant 1, mRNA.	RDHL; 3alpha-HSD; RETSDR8; RDH15
ILMN_1807825	NM_004271.3	LY86	9450	LY86	-1.29582	0.180875	0.211808	0.198726	9.46878e-12	8.14212e-10	-0.802028	0.185582	0.32265	0.308539	2.26935e-05	0.00179476	lymphocyte antigen 86 (LY86), mRNA.	dJ80N2.1; MMD-1; RP1-80N2.1; MD-1
ILMN_1812461	NM_003881.2	WISP2	8839	WISP2	-0.719134	0.100482	0.211525	0.198438	9.89484e-12	8.49304e-10	-0.338898	0.119437	0.293634	0.278919	0.00493626	0.0779224	WNT1 inducible signaling pathway protein 2 (WISP2), mRNA.	CTGF-L; CT58; CCN5
ILMN_1695851	NM_022141.4	PARVG	64098	PARVG	-1.63328	0.228438	0.211251	0.198159	1.03263e-11	8.83136e-10	-0.988576	0.236918	0.319319	0.305138	4.21146e-05	0.00286585	parvin, gamma (PARVG), mRNA.
ILMN_1662843	NM_000560.3	CD53	963	CD53	-1.90122	0.266079	0.211079	0.197985	1.06053e-11	9.02099e-10	-1.15279	0.275611	0.31954	0.305364	4.04193e-05	0.00278657	CD53 molecule (CD53), transcript variant 2, mRNA.	MOX44; TSPAN25
ILMN_1791280	NM_014365.2	HSPB8	26353	HSPB8	-1.16315	0.162819	0.211022	0.197927	1.0701e-11	9.08603e-10	-0.735055	0.165058	0.325661	0.311612	1.29654e-05	0.00119997	heat shock 22kDa protein 8 (HSPB8), mRNA.	HMN2; E2IG1; HMN2A; H11; DHMN2; HSP22; CMT2L
ILMN_1676372	NM_021155.2	CD209	30835	CD209	-1.21238	0.169979	0.210584	0.197482	1.14547e-11	9.67395e-10	-0.723792	0.177349	0.317316	0.303094	6.10407e-05	0.00371061	CD209 molecule (CD209), mRNA.	DC-SIGN1; DC-SIGN; CLEC4L; MGC129965; CDSIGN
ILMN_1722820	NM_006855.2	KDELR3	11015	KDELR3	-1.63225	0.229058	0.21033	0.197223	1.19168e-11	1.00283e-09	-1.05175	0.229713	0.328584	0.314596	7.52008e-06	0.000810147	KDEL (Lys-Asp-Glu-Leu) endoplasmic reticulum protein retention receptor 3 (KDELR3), transcript variant 1, mRNA.	ERD2L3
ILMN_2392043	NM_003120.2	SPI1	6688	SPI1	-1.13426	0.15922	0.21025	0.197142	1.20652e-11	1.01352e-09	-0.692871	0.164043	0.320451	0.306293	3.41395e-05	0.00245379	spleen focus forming virus (SFFV) proviral integration oncogene spi1 (SPI1), transcript variant 2, mRNA.	SPI-A; SFPI1; PU.1; OF; SPI-1
ILMN_1719543	NM_005360.3	MAF	4094	MAF	-2.04942	0.287708	0.210227	0.197119	1.2108e-11	1.01531e-09	-1.41283	0.279281	0.340285	0.326541	8.38715e-07	0.000166865	v-maf musculoaponeurotic fibrosarcoma oncogene homolog (avian) (MAF), transcript variant 1, mRNA.	MGC71685
ILMN_1800975	NM_005789.2	PSME3	10197	PSME3	-2.6117	0.367127	0.209866	0.196752	1.2807e-11	1.07202e-09	-1.71127	0.364934	0.331213	0.31728	4.60273e-06	0.00055531	proteasome (prosome, macropain) activator subunit 3 (PA28 gamma; Ki) (PSME3), transcript variant 1, mRNA.	PA28-gamma; Ki; PA28G; REG-GAMMA
ILMN_1753890	NM_014573.2	TMEM97	27346	IFT20	-3.17349	0.447035	0.209291	0.196167	1.40042e-11	1.16242e-09	-2.16262	0.435856	0.337861	0.324066	1.32372e-06	0.000233237	transmembrane protein 97 (TMEM97), mRNA.	MAC30
ILMN_1714586	NM_016206.2	VGLL3	389136	VGLL3	-1.017	0.143281	0.209251	0.196126	1.40917e-11	1.16717e-09	-0.482119	0.168298	0.294076	0.279369	0.00454429	0.0739819	vestigial like 3 (Drosophila) (VGLL3), mRNA.	VGL-3; DKFZp686O1845; VGL3; FLJ38507
ILMN_2413808	NM_000560.3	CD53	963	CD53	-1.51094	0.212977	0.209113	0.195987	1.43956e-11	1.19025e-09	-0.912969	0.220216	0.318728	0.304534	4.69948e-05	0.00311721	CD53 molecule (CD53), transcript variant 2, mRNA.	MOX44; TSPAN25
ILMN_1800626	NM_014454.1	SESN1	27244	SESN1	-2.17256	0.306815	0.2086	0.195465	1.55894e-11	1.28232e-09	-1.51776	0.295575	0.342207	0.328503	5.83643e-07	0.000133347	sestrin 1 (SESN1), mRNA.	SEST1; MGC138241; MGC142129; PA26; RP11-787I22.1
ILMN_2401978	NM_213662.1	STAT3	6774	STAT3	-1.76834	0.24981	0.208512	0.195375	1.5805e-11	1.29772e-09	-1.11108	0.253008	0.324239	0.31016	1.68925e-05	0.00143689	signal transducer and activator of transcription 3 (acute-phase response factor) (STAT3), transcript variant 3, mRNA.	APRF; FLJ20882; MGC16063
ILMN_1692731	NM_025250.2	TTYH3	80727	TTYH3	-1.4332	0.202521	0.208437	0.195299	1.59891e-11	1.30948e-09	-0.837864	0.212715	0.314268	0.299982	0.000107344	0.00555439	tweety homolog 3 (Drosophila) (TTYH3), mRNA.	KIAA1691
ILMN_1758938	NM_001860.2	SLC31A2	1318	SLC31A2	-1.23017	0.17409	0.208032	0.194887	1.70258e-11	1.38354e-09	-0.816444	0.171606	0.332859	0.318961	3.38303e-06	0.000448171	solute carrier family 31 (copper transporters), member 2 (SLC31A2), mRNA.	hCTR2; CTR2; COPT2
ILMN_2057479	NM_015507.2	EGFL6	25975	EGFL6	-0.264468	0.0374527	0.207845	0.194697	1.7528e-11	1.41704e-09	-0.134471	0.0422313	0.29953	0.284937	0.00164392	0.0376922	EGF-like-domain, multiple 6 (EGFL6), mRNA.	DKFZp564P2063; W80; MAEG
ILMN_1656938	XM_001133149.1	LOC731486	731486	SLC37A2	-1.78403	0.252687	0.2078	0.194651	1.76498e-11	1.42305e-09	-1.09467	0.258661	0.320636	0.306483	3.29829e-05	0.00239247	PREDICTED: hypothetical protein LOC731486 (LOC731486), mRNA.
ILMN_1709683	NM_170773.1	RASSF2	9770	RASSF2	-1.10495	0.156506	0.207795	0.194647	1.76625e-11	1.42305e-09	-0.677766	0.160231	0.320589	0.306435	3.32738e-05	0.00240988	Ras association (RalGDS/AF-6) domain family 2 (RASSF2), transcript variant 2, mRNA.	DKFZp781O1747; KIAA0168
ILMN_3176403	XR_041433.1	FTHL16	2508	FTH1	-2.8302	0.400922	0.207762	0.194612	1.77549e-11	1.42806e-09	-1.71615	0.412814	0.318978	0.30479	4.48597e-05	0.00299661	PREDICTED: misc_RNA (FTHL16), miscRNA.
ILMN_1742187	NM_005907.2	MAN1A1	4121	MAN1A1	-2.07807	0.294389	0.20775	0.1946	1.77874e-11	1.42824e-09	-1.38129	0.289885	0.333035	0.31914	3.27335e-06	0.000438366	mannosidase, alpha, class 1A, member 1 (MAN1A1), mRNA.	MAN9; HUMM3; HUMM9
ILMN_1656413	NM_005857.3	ZMPSTE24	10269	ZMPSTE24	-2.42586	0.343714	0.207707	0.194557	1.79066e-11	1.43295e-09	-1.53979	0.345965	0.325601	0.311551	1.311e-05	0.00120178	zinc metallopeptidase (STE24 homolog, S. cerevisiae) (ZMPSTE24), mRNA.	FLJ14968; STE24; FACE-1; Ste24p; FACE1
ILMN_1718984	XM_001131379.1	FCGBP	8857	FCGBP	-0.910836	0.12907	0.207673	0.194522	1.80003e-11	1.43802e-09	-0.562953	0.131618	0.321646	0.307514	2.73457e-05	0.00206926	PREDICTED: Fc fragment of IgG binding protein (FCGBP), mRNA.
ILMN_1696347	NM_001814.2	CTSC	1075	CTSC	-1.25356	0.17793	0.207222	0.194064	1.93023e-11	1.53426e-09	-0.846516	0.173829	0.335591	0.321749	2.02761e-06	0.000311343	cathepsin C (CTSC), transcript variant 1, mRNA.	JPD; DPP1; JP; HMS; CPPI; PALS; PLS; DPPI
ILMN_1780057	NM_002910.4	RENBP	5973	RENBP	-1.76336	0.250406	0.207099	0.193939	1.96746e-11	1.556e-09	-1.11369	0.252435	0.324705	0.310636	1.54897e-05	0.00134911	renin binding protein (RENBP), mRNA.	RNBP; RBP
ILMN_1787345	NM_016594.1	FKBP11	51303	FKBP11	-3.06329	0.435162	0.207	0.193838	1.99785e-11	1.5774e-09	-1.90612	0.441809	0.322484	0.308369	2.34046e-05	0.00184176	FK506 binding protein 11, 19 kDa (FKBP11), mRNA.	MGC54182; FKBP19
ILMN_1690566	NM_032023.3	RASSF4	83937	RASSF4	-2.11717	0.300945	0.206833	0.193668	2.05023e-11	1.61069e-09	-1.4024	0.296501	0.332188	0.318275	3.83611e-06	0.000489017	Ras association (RalGDS/AF-6) domain family member 4 (RASSF4), mRNA.	AD037; MGC44914
ILMN_2355953	NM_001081438.1	LILRB4	11006	LILRB4	-2.54774	0.362217	0.206782	0.193616	2.06659e-11	1.61817e-09	-1.56566	0.369875	0.320657	0.306504	3.28589e-05	0.00238714	leukocyte immunoglobulin-like receptor, subfamily B (with TM and ITIM domains), member 4 (LILRB4), transcript variant 2, mRNA.	CD85K; HM18; LIR-5; ILT3; LILRB5; LIR5
ILMN_1761858	NM_033290.2	MID1	4281	MID1	-1.61612	0.229765	0.206784	0.193618	2.06589e-11	1.61817e-09	-1.0568	0.227723	0.330056	0.316098	5.71427e-06	0.000657544	midline 1 (Opitz/BBB syndrome) (MID1), transcript variant 3, mRNA.	RNF59; OGS1; TRIM18; FXY; OS; XPRF; GBBB1; OSX; BBBG1; ZNFXY
ILMN_2210601	NM_021133.2	RNASEL	6041	RNASEL	-2.78283	0.395665	0.206765	0.193599	2.07201e-11	1.61973e-09	-1.67465	0.408228	0.317775	0.303562	5.60702e-05	0.00351801	ribonuclease L (2',5'-oligoisoadenylate synthetase-dependent) (RNASEL), mRNA.	DKFZp781D08126; MGC133329; RNS4; PRCA1; MGC104972
ILMN_2384591	NM_016185.2	HN1	51155	HN1	-3.48683	0.496174	0.20654	0.19337	2.1455e-11	1.66343e-09	-2.08338	0.513537	0.316791	0.302558	6.72782e-05	0.0039674	hematological and neurological expressed 1 (HN1), transcript variant 1, mRNA.	HN1A; ARM2
ILMN_1660111	NM_006002.3	UCHL3	7347	UCHL3	-2.19383	0.312254	0.206477	0.193306	2.1665e-11	1.67697e-09	-1.47549	0.305374	0.334659	0.320797	2.41506e-06	0.000354714	ubiquitin carboxyl-terminal esterase L3 (ubiquitin thiolesterase) (UCHL3), mRNA.	UCH-L3
ILMN_1706013	NR_002204.1	FTHL11	2503		-1.08658	0.155167	0.205588	0.192403	2.48578e-11	1.90539e-09	-0.626699	0.163142	0.312227	0.297898	0.000156608	0.00720487	ferritin, heavy polypeptide-like 11 (FTHL11) on chromosome 8.
ILMN_1669502	NM_001949.2	E2F3	1871	E2F3	-2.48816	0.355651	0.205335	0.192146	2.58482e-11	1.9781e-09	-1.57397	0.357342	0.324541	0.310469	1.5969e-05	0.00137818	E2F transcription factor 3 (E2F3), mRNA.	KIAA0075; E2F-3; MGC104598; DKFZp686C18211
ILMN_1738718	NM_007022.3	CYB561D2	11068	CYB561D2	-3.36584	0.481246	0.205257	0.192066	2.61633e-11	1.9962e-09	-2.10331	0.486291	0.32273	0.30862	2.2361e-05	0.00178038	cytochrome b-561 domain containing 2 (CYB561D2), mRNA.	TSP10; 101F6
ILMN_1727709	NM_170699.2	GPBAR1	151306	GPBAR1	-1.32561	0.189536	0.205256	0.192065	2.61692e-11	1.9962e-09	-0.845112	0.18972	0.325689	0.311641	1.28966e-05	0.00119594	G protein-coupled bile acid receptor 1 (GPBAR1), transcript variant 3, mRNA.	GPR131; M-BAR; GPCR; GPCR19; BG37; TGR5; MGC40597
ILMN_1737514	NM_001032998.1	KYNU	8942	KYNU	-2.82995	0.405495	0.204682	0.191481	2.85964e-11	2.16045e-09	-1.6994	0.417258	0.317134	0.302908	6.31344e-05	0.00380366	kynureninase (L-kynurenine hydrolase) (KYNU), transcript variant 2, mRNA.
ILMN_1813043	NM_017614.3	BHMT2	23743	BHMT2	-1.33024	0.190697	0.204552	0.19135	2.91727e-11	2.20047e-09	-0.781837	0.198238	0.314374	0.30009	0.000105254	0.00547019	betaine-homocysteine methyltransferase 2 (BHMT2), mRNA.	FLJ20001
ILMN_2316386	NM_001077191.1	GPBAR1	151306	GPBAR1	-0.997607	0.14339	0.203851	0.190637	3.25116e-11	2.42524e-09	-0.619474	0.145016	0.321525	0.30739	2.79691e-05	0.0021	G protein-coupled bile acid receptor 1 (GPBAR1), transcript variant 1, mRNA.	GPR131; M-BAR; GPCR; GPCR19; BG37; TGR5; MGC40597
ILMN_1666976	NM_001031696.1	PLD3	23646	PLD3	-1.07884	0.155073	0.203837	0.190622	3.25816e-11	2.42663e-09	-0.692289	0.154456	0.326328	0.312294	1.14503e-05	0.001094	phospholipase D family, member 3 (PLD3), transcript variant 1, mRNA.	HU-K4
ILMN_1774604	NM_022572.2	PNKD	25953	PNKD	-3.18236	0.457759	0.203649	0.190432	3.35374e-11	2.48608e-09	-2.00829	0.459343	0.323796	0.309708	1.83429e-05	0.00153814	paroxysmal nonkinesiogenic dyskinesia (PNKD), transcript variant 2, mRNA.	FKSG19; KIPP1184; DKFZp564N1362; MR1; FPD1; TAHCCP2; MGC31943; DYT8; KIAA1184; BRP17; MR-1; PDC	D
ILMN_1747744	NM_005779.1	LHFPL2	10184	LHFPL2	-1.56046	0.224542	0.203553	0.190334	3.40419e-11	2.51559e-09	-0.953233	0.228738	0.319202	0.305019	4.30372e-05	0.00291188	lipoma HMGIC fusion partner-like 2 (LHFPL2), mRNA.	KIAA0206
ILMN_2134538	NR_002204.1	FTHL11	2503	FTH1	-1.19635	0.172374	0.203205	0.18998	3.59166e-11	2.64025e-09	-0.697081	0.179477	0.313113	0.298802	0.000132931	0.00648885	ferritin, heavy polypeptide-like 11 (FTHL11) on chromosome 8.
ILMN_1719316	NM_007364.2	TMED3	23423	TMED3	-1.17511	0.169318	0.203199	0.189974	3.59521e-11	2.64025e-09	-0.791903	0.164863	0.333968	0.320092	2.74878e-06	0.000386907	transmembrane emp24 protein transport domain containing 3 (TMED3), mRNA.	MGC133022; C15orf22; P24B
ILMN_3302919	NM_013451.3	MYOF	26509	MYOF	-1.42276	0.20513	0.203032	0.189805	3.68855e-11	2.69719e-09	-0.787648	0.218829	0.30733	0.292899	0.000387448	0.0139029	myoferlin (MYOF), transcript variant 1, mRNA.
ILMN_1762825	NM_001746.3	CANX	821	CANX	-1.8824	0.271969	0.202476	0.189239	4.01917e-11	2.91986e-09	-1.09882	0.282536	0.313221	0.298913	0.000130296	0.00641228	calnexin (CANX), transcript variant 1, mRNA.	P90; IP90; FLJ26570; CNX
ILMN_1739222	NM_004454.1	ETV5	2119	ETV5	-2.28641	0.330593	0.202274	0.189034	4.14568e-11	3.00254e-09	-1.50921	0.324499	0.330298	0.316345	5.46176e-06	0.000638329	ets variant gene 5 (ets-related molecule) (ETV5), mRNA.	ERM
ILMN_1726189	NM_032597.3	MS4A14	84689	MS4A14	-2.50863	0.362751	0.202254	0.189014	4.15868e-11	3.00735e-09	-1.53332	0.368659	0.319022	0.304835	4.44959e-05	0.00298363	membrane-spanning 4-domains, subfamily A, member 14 (MS4A14), transcript variant 1, mRNA.	MGC49828; MGC104289; MS4A14
ILMN_1743032	NM_004079.3	CTSS	1520	CTSS	-1.78873	0.258679	0.202228	0.188987	4.17548e-11	3.01489e-09	-1.05064	0.267818	0.313932	0.299639	0.000114232	0.00582793	cathepsin S (CTSS), mRNA.	MGC3886
ILMN_1761941	NM_016613.5	C4orf18	51313	FAM198B	-1.24567	0.180158	0.202206	0.188965	4.18942e-11	3.01574e-09	-0.65899	0.196029	0.302769	0.288244	0.000901271	0.0247962	chromosome 4 open reading frame 18 (C4orf18), transcript variant 2, mRNA.	AD021; DKFZp434L142; AD036; FLJ38155
ILMN_1721876	NM_003255.4	TIMP2	7077	TIMP2	-1.63643	0.237282	0.201528	0.188276	4.65038e-11	3.3073e-09	-0.968404	0.244495	0.314733	0.300456	9.84956e-05	0.00521732	TIMP metallopeptidase inhibitor 2 (TIMP2), mRNA.	CSC-21K
ILMN_2226955	NM_030796.3	VOPP1	81552	VOPP1	-3.2887	0.476946	0.201482	0.188229	4.68382e-11	3.32608e-09	-2.09537	0.475091	0.324674	0.310604	1.55794e-05	0.00135443	vesicular, overexpressed in cancer, prosurvival protein 1 (VOPP1), mRNA.	FLJ20532; DKFZP564K0822
ILMN_1748538	NM_170697.1	ALDH1A2	8854	ALDH1A2	-1.16887	0.169847	0.200969	0.187707	5.06821e-11	3.57755e-09	-0.731834	0.170396	0.322046	0.307921	2.53917e-05	0.00194515	aldehyde dehydrogenase 1 family, member A2 (ALDH1A2), transcript variant 3, mRNA.	MGC26444; RALDH(II); RALDH2; RALDH2-T
ILMN_1651354	NM_000582.2	SPP1	6696	SPP1	-0.381572	0.0554446	0.200974	0.187713	5.06426e-11	3.57755e-09	-0.228632	0.0567473	0.316188	0.301942	7.52306e-05	0.00431267	secreted phosphoprotein 1 (SPP1), transcript variant 2, mRNA.	BNSP; BSPI; OPN; MGC110940; ETA-1
ILMN_1749403	NM_178562.2	TSPAN33	340348	TSPAN33	-1.80193	0.261888	0.200917	0.187654	5.10953e-11	3.59606e-09	-1.12874	0.262658	0.322101	0.307978	2.51318e-05	0.00192952	tetraspanin 33 (TSPAN33), mRNA.	MGC50844; PEN
ILMN_1783593	NM_005408.2	CCL13	6357	CCL13	-0.752375	0.109366	0.200874	0.18761	5.14328e-11	3.60365e-09	-0.521164	0.105014	0.337886	0.324092	1.3175e-06	0.000233237	chemokine (C-C motif) ligand 13 (CCL13), mRNA.	MGC17134; SCYA13; CKb10; MCP-4; NCC-1; SCYL1; NCC1
ILMN_1716309	NM_015507.2	EGFL6	25975	EGFL6	-0.321145	0.0466809	0.200881	0.187618	5.13767e-11	3.60365e-09	-0.165921	0.0511825	0.300565	0.285993	0.00135653	0.0331726	EGF-like-domain, multiple 6 (EGFL6), mRNA.	DKFZp564P2063; W80; MAEG
ILMN_1791792	NM_020375.2	C12orf5	57103	C12orf5	-2.42411	0.352423	0.200836	0.187572	5.17301e-11	3.61911e-09	-1.6286	0.342756	0.33271	0.318808	3.47915e-06	0.000458247	chromosome 12 open reading frame 5 (C12orf5), mRNA.	TIGAR
ILMN_3241758	NM_001099771.1	POTEF	728378	POTEF	-1.37835	0.200449	0.200755	0.18749	5.23813e-11	3.65926e-09	-0.812727	0.206601	0.31416	0.299872	0.000109508	0.0056417	POTE ankyrin domain family, member F (POTEF), mRNA.	POTEACTIN
ILMN_1655987	NM_015136.2	STAB1	23166	STAB1	-1.34554	0.195732	0.200682	0.187415	5.29716e-11	3.6896e-09	-0.849594	0.195546	0.323173	0.309072	2.05946e-05	0.00168512	stabilin 1 (STAB1), mRNA.	CLEVER-1; KIAA0246; STAB-1; FELE-1; FEX1; FEEL-1
ILMN_1752046	NM_005475.1	SH2B3	10019	SH2B3	-1.65201	0.240422	0.200564	0.187295	5.39428e-11	3.75172e-09	-1.07498	0.236992	0.327583	0.313575	9.06286e-06	0.000930189	SH2B adaptor protein 3 (SH2B3), mRNA.	LNK
ILMN_1734184	NM_173542.2	P76	196463	PLBD2	-1.58458	0.230636	0.200533	0.187264	5.4198e-11	3.76393e-09	-1.07213	0.223569	0.333776	0.319897	2.84928e-06	0.000394455	mannose-6-phosphate protein p76 (P76), mRNA.
ILMN_1688480	NM_053056.2	CCND1	595	CCND1	-0.706678	0.102906	0.20041	0.187139	5.52372e-11	3.83048e-09	-0.440052	0.103408	0.321161	0.307018	2.99252e-05	0.00222179	cyclin D1 (CCND1), mRNA.	PRAD1; D11S287E; BCL1; U21B31
ILMN_1764228	NM_001343.2	DAB2	1601	DAB2	-1.32071	0.192418	0.200278	0.187005	5.63655e-11	3.903e-09	-0.857382	0.189802	0.327146	0.313129	9.83199e-06	0.000985157	disabled homolog 2, mitogen-responsive phosphoprotein (Drosophila) (DAB2), mRNA.	FLJ26626; DOC2; DOC-2
ILMN_2283388	NM_018840.2	C20orf24	55969	C20orf24,TGIF2-C20ORF24	-1.32718	0.193864	0.199599	0.186314	6.25679e-11	4.30726e-09	-0.872011	0.190087	0.328793	0.31481	7.23248e-06	0.00078814	chromosome 20 open reading frame 24 (C20orf24), transcript variant 1, mRNA.	PNAS-11; RIP5
ILMN_1767113	NM_001159.3	AOX1	316	AOX1	-0.906725	0.132443	0.199607	0.186323	6.24861e-11	4.30726e-09	-0.551632	0.134319	0.317876	0.303665	5.50316e-05	0.0034656	aldehyde oxidase 1 (AOX1), mRNA.	AO; AOH1
ILMN_1788283	NM_021149.2	COTL1	23406	COTL1	-1.66147	0.242828	0.199456	0.186169	6.39612e-11	4.37992e-09	-0.921393	0.256782	0.30711	0.292675	0.000403504	0.0143161	coactosin-like 1 (Dictyostelium) (COTL1), mRNA.	CLP; FLJ43657; MGC19733
ILMN_1713124	NM_003739.4	AKR1C3	8644	AKR1C3	-0.82404	0.120441	0.199444	0.186157	6.40763e-11	4.37992e-09	-0.497351	0.122552	0.316821	0.302588	6.69133e-05	0.0039607	aldo-keto reductase family 1, member C3 (3-alpha hydroxysteroid dehydrogenase, type II) (AKR1C3), mRNA.	HAKRB; hluPGFS; DD3; HSD17B5; HAKRe; KIAA0119; HA1753; DDX
ILMN_2335704	NM_000631.3	NCF4	4689	NCF4	-1.56545	0.229099	0.199109	0.185816	6.74577e-11	4.60367e-09	-0.947225	0.232724	0.317078	0.30285	6.38013e-05	0.00383895	neutrophil cytosolic factor 4, 40kDa (NCF4), transcript variant 1, mRNA.	SH3PXD4; P40PHOX; NCF; MGC3810
ILMN_2073289	NM_014751.2	MTSS1	9788	MTSS1	-1.674	0.245253	0.198825	0.185528	7.04594e-11	4.80159e-09	-0.970396	0.253851	0.311839	0.297502	0.000168257	0.0075427	metastasis suppressor 1 (MTSS1), mRNA.	MIM; KIAA0429; MIMA; MIMB; FLJ44694
ILMN_2335754	NM_001042586.1	CD1E	913	CD1E	-3.35151	0.491096	0.198786	0.185487	7.08917e-11	4.8241e-09	-2.06635	0.494487	0.319454	0.305276	4.10712e-05	0.00281899	CD1e molecule (CD1E), transcript variant 5, mRNA.	CD1A; R2
ILMN_1680353	NM_006178.1	NSF	4905	NSF	-2.17586	0.319056	0.1986	0.185298	7.2942e-11	4.9565e-09	-1.29398	0.326344	0.314823	0.300548	9.68699e-05	0.00516501	N-ethylmaleimide-sensitive factor (NSF), mRNA.	SKD2
ILMN_2056032	NM_002414.3	CD99	4267		-1.74346	0.255733	0.198518	0.185216	7.38608e-11	5.01173e-09	-1.04354	0.260788	0.315599	0.301341	8.39006e-05	0.00463205	CD99 molecule (CD99), transcript variant 1, mRNA.	MIC2; MIC2Y; MIC2X
ILMN_1773125	NM_001098175.1	ENTPD1	953	ENTPD1	-2.87202	0.421409	0.198433	0.185129	7.48303e-11	5.07023e-09	-1.85032	0.4161	0.325511	0.311459	1.33316e-05	0.00121018	ectonucleoside triphosphate diphosphohydrolase 1 (ENTPD1), transcript variant 2, mRNA.	FLJ40959; DKFZp686D194; NTPDase-1; FLJ40921; ATPDase; DKFZp686I093; CD39
ILMN_1755649	NM_004695.2	SLC16A5	9121	SLC16A5	-2.81679	0.413904	0.198058	0.184747	7.92655e-11	5.34776e-09	-1.70919	0.41923	0.317225	0.303001	6.208e-05	0.00375449	solute carrier family 16, member 5 (monocarboxylic acid transporter 6) (SLC16A5), mRNA.	MCT5; MCT6
ILMN_1734740	NM_003608.2	GPR65	8477	GPR65	-2.98102	0.438087	0.198028	0.184717	7.96252e-11	5.36438e-09	-1.8658	0.437746	0.321313	0.307173	2.90928e-05	0.00216679	G protein-coupled receptor 65 (GPR65), mRNA.	TDAG8; hTDAG8
ILMN_1691410	NM_012342.2	BAMBI	25805	BAMBI	-1.54216	0.226702	0.197951	0.184639	8.05769e-11	5.42077e-09	-1.1179	0.213294	0.344917	0.331269	3.49589e-07	9.70013e-05	BMP and activin membrane-bound inhibitor homolog (Xenopus laevis) (BAMBI), mRNA.	NMA
ILMN_1749662	NM_201397.1	GPX1	2876	GPX1	-1.11348	0.163911	0.197594	0.184276	8.51056e-11	5.66899e-09	-0.746204	0.159046	0.331273	0.317341	4.55162e-06	0.000552996	glutathione peroxidase 1 (GPX1), transcript variant 2, mRNA.	MGC14399; GSHPX1; MGC88245
ILMN_2360291	NM_020120.2	UGCGL1	56886	UGGT1	-2.89933	0.427686	0.19706	0.183733	9.23682e-11	6.1183e-09	-1.68724	0.440485	0.311998	0.297665	0.000163362	0.00741839	UDP-glucose ceramide glucosyltransferase-like 1 (UGCGL1), transcript variant 1, mRNA.	FLJ23796; HUGT1; FLJ23671
ILMN_1689004	NM_016639.1	TNFRSF12A	51330	TNFRSF12A	-2.14726	0.316925	0.196914	0.183585	9.44531e-11	6.24764e-09	-1.41903	0.309067	0.328885	0.314904	7.10914e-06	0.000778286	tumor necrosis factor receptor superfamily, member 12A (TNFRSF12A), mRNA.	CD266; TWEAKR; FN14
ILMN_1795227	NM_003746.1	DNCL1	8655	DYNLL1	-1.8204	0.268754	0.196847	0.183516	9.54302e-11	6.29375e-09	-1.20493	0.2619	0.329108	0.315131	6.82027e-06	0.00075896	dynein, cytoplasmic, light polypeptide 1 (DNCL1), mRNA.	PIN; MGC126138; hdlc1; DLC1; MGC126137; LC8; DLC8
ILMN_1654262	NM_152240.1	ZMAT3	64393	ZMAT3	-1.60584	0.237084	0.196839	0.183508	9.55494e-11	6.29375e-09	-0.904512	0.247608	0.308393	0.293985	0.000318258	0.0119648	zinc finger, matrin type 3 (ZMAT3), transcript variant 2, mRNA.	PAG608; WIG1; FLJ12296; WIG-1; MGC10613
ILMN_1660691	NM_006868.2	RAB31	11031	RAB31	-1.14856	0.16957	0.19684	0.18351	9.55227e-11	6.29375e-09	-0.605153	0.182387	0.301958	0.287415	0.00104759	0.0275861	RAB31, member RAS oncogene family (RAB31), mRNA.	Rab22B
ILMN_1733756	NM_080645.2	COL12A1	1303	COL12A1	-0.966111	0.142889	0.196383	0.183045	1.02448e-10	6.69223e-09	-0.548866	0.148536	0.309238	0.294847	0.000272225	0.010711	collagen, type XII, alpha 1 (COL12A1), transcript variant short, mRNA.	BA209D8.1; DJ234P15.1; COL12A1L
ILMN_2407824	NM_001001787.1	ATP1B1	481	ATP1B1	-0.826579	0.12225	0.196386	0.183048	1.02399e-10	6.69223e-09	-0.500236	0.123641	0.316552	0.302314	7.03202e-05	0.00409771	ATPase, Na+/K+ transporting, beta 1 polypeptide (ATP1B1), transcript variant 2, mRNA.	MGC1798; ATP1B
ILMN_2398274	NM_145182.1	PYCARD	29108	PYCARD	-4.69643	0.694964	0.196252	0.182911	1.04533e-10	6.819e-09	-2.98189	0.688556	0.322853	0.308746	2.18546e-05	0.00174889	PYD and CARD domain containing (PYCARD), transcript variant 2, mRNA.	TMS1; MGC10332; ASC; CARD5
ILMN_1672660	NM_001025100.1	MBP	4155	MBP	-1.25915	0.186432	0.196106	0.182763	1.06892e-10	6.94414e-09	-0.720501	0.193092	0.309969	0.295594	0.000237769	0.0097045	myelin basic protein (MBP), transcript variant 8, mRNA.	MGC99675
ILMN_2133675	NM_000199.2	SGSH	6448	SGSH	-1.83765	0.272222	0.195977	0.182632	1.09022e-10	7.07281e-09	-1.13743	0.272521	0.319342	0.305162	4.19305e-05	0.00285744	N-sulfoglucosamine sulfohydrolase (sulfamidase) (SGSH), mRNA.	HSS; MPS3A; SFMD
ILMN_1795183	NM_198232.1	RNASE1	6035	RNASE1	-1.15902	0.171746	0.195898	0.182552	1.10342e-10	7.14286e-09	-0.683851	0.175469	0.313391	0.299087	0.000126252	0.00627863	ribonuclease, RNase A family, 1 (pancreatic) (RNASE1), transcript variant 3, mRNA.	MGC12408; RNS1; RIB1
ILMN_2415303	NM_006344.2	CLEC10A	10462	CLEC10A	-2.37606	0.352209	0.19581	0.182463	1.11836e-10	7.22564e-09	-1.70864	0.331897	0.342541	0.328844	5.47921e-07	0.000129384	C-type lectin domain family 10, member A (CLEC10A), transcript variant 2, mRNA.	HML; CD301; HML2; CLECSF13; CLECSF14
ILMN_1802780	NM_174941.3	M160	283316	CD163L1	-1.32299	0.196161	0.195744	0.182395	1.12982e-10	7.27553e-09	-0.863061	0.192065	0.326595	0.312566	1.08948e-05	0.00105706	scavenger receptor cysteine-rich type 1 protein M160 (M160), mRNA.	CD163B
ILMN_1674243	NM_003234.1	TFRC	7037	TFRC	-0.796903	0.118342	0.195345	0.18199	1.20082e-10	7.70578e-09	-0.44991	0.123106	0.308426	0.294018	0.00031633	0.0119173	transferrin receptor (p90, CD71) (TFRC), mRNA.	TFR; TFR1; CD71; TRFR
ILMN_1797604	NM_006367.2	CAP1	10487	CAP1	-2.02242	0.300442	0.195254	0.181898	1.2176e-10	7.79229e-09	-1.22372	0.30335	0.316297	0.302053	7.37285e-05	0.00424199	CAP, adenylate cyclase-associated protein 1 (yeast) (CAP1), mRNA.	CAP1-PEN; CAP
ILMN_1696360	NM_147780.2	CTSB	1508	CTSB	-0.843146	0.125272	0.195218	0.18186	1.22448e-10	7.82578e-09	-0.539298	0.123576	0.323614	0.309522	1.8974e-05	0.00157985	cathepsin B (CTSB), transcript variant 2, mRNA.	CPSB; APPS
ILMN_1733538	NM_001005339.1	RGS10	6001	RGS10	-1.06882	0.158836	0.195163	0.181805	1.23465e-10	7.85886e-09	-0.686501	0.156405	0.324187	0.310108	1.70541e-05	0.00144544	regulator of G-protein signaling 10 (RGS10), transcript variant 1, mRNA.
ILMN_2397028	NM_002640.3	SERPINB8	5271	SERPINB8	-4.05519	0.602901	0.195052	0.181692	1.25581e-10	7.97214e-09	-2.64086	0.590259	0.326142	0.312103	1.18548e-05	0.00112132	serpin peptidase inhibitor, clade B (ovalbumin), member 8 (SERPINB8), transcript variant 1, mRNA.	CAP2; PI8
ILMN_1752802	NM_030782.3	CLPTM1L	81037	CLPTM1L	-1.57187	0.233875	0.194858	0.181495	1.29365e-10	8.19032e-09	-0.996936	0.231408	0.322344	0.308226	2.40235e-05	0.00187796	CLPTM1-like (CLPTM1L), mRNA.	DKFZp666M1010; FLJ14400; CRR9; DKFZP761M2324
ILMN_1753243	NM_016306.4	DNAJB11	51726	DNAJB11	-2.44309	0.363608	0.194784	0.181419	1.30842e-10	8.26172e-09	-1.499	0.364723	0.317943	0.303734	5.43486e-05	0.00344959	DnaJ (Hsp40) homolog, subfamily B, member 11 (DNAJB11), mRNA.	PRO1080; HEDJ; ABBP-2; UNQ537; hDj9; EDJ; ERdj3; ERj3; ABBP2
ILMN_1689046	NM_019027.1	FLJ20273	54502	RBM47	-2.87519	0.428753	0.194289	0.180916	1.41119e-10	8.83984e-09	-1.62332	0.445091	0.308276	0.293866	0.000325193	0.0121387	RNA-binding protein (FLJ20273), mRNA.	DKFZp686F02235
ILMN_2095133	NM_003127.1	SPTAN1	6709	SPTAN1	-1.50244	0.224141	0.194181	0.180807	1.43454e-10	8.96237e-09	-0.857242	0.231598	0.309364	0.294976	0.000265947	0.0105382	spectrin, alpha, non-erythrocytic 1 (alpha-fodrin) (SPTAN1), mRNA.	FLJ44613; (ALPHA)II-SPECTRIN
ILMN_1709204	NM_194447.2	CLEC4A	50856	CLEC4A	-1.99854	0.29855	0.193843	0.180463	1.5106e-10	9.38793e-09	-1.19847	0.301915	0.314918	0.300645	9.51802e-05	0.00509791	C-type lectin domain family 4, member A (CLEC4A), transcript variant 3, mRNA.	DCIR; DDB27; LLIR; HDCGC13P; CLECSF6
ILMN_1761463	NM_024329.4	EFHD2	79180	EFHD2	-1.12245	0.167727	0.193766	0.180384	1.52848e-10	9.48663e-09	-0.569384	0.181959	0.298557	0.283943	0.00196983	0.0422308	EF-hand domain family, member D2 (EFHD2), mRNA.	MGC4342; RP3-467K16.3
ILMN_1708537	NM_203284.1	RBPJ	3516	RBPJ	-1.93504	0.289398	0.193551	0.180166	1.57932e-10	9.76373e-09	-1.0624	0.303551	0.30539	0.290919	0.000554682	0.0177491	recombination signal binding protein for immunoglobulin kappa J region (RBPJ), transcript variant 4, mRNA.	SUH; RBP-J; RBPJK; csl; KBF2; IGKJRB1; IGKJRB; CBF1; RBPSUH; MGC61669
ILMN_3220934	NR_024204.1	NCRNA00152	112597		-2.69196	0.402665	0.193511	0.180126	1.589e-10	9.81073e-09	-1.49081	0.420788	0.306223	0.291769	0.000475473	0.0161197	non-protein coding RNA 152 (NCRNA00152), transcript variant 1, non-coding RNA.
ILMN_1715569	NM_016053.2	CCDC53	51019	CCDC53	-2.17161	0.325131	0.193278	0.179888	1.64666e-10	1.01535e-08	-1.46115	0.313621	0.33049	0.316542	5.26923e-06	0.000619422	coiled-coil domain containing 53 (CCDC53), mRNA.	CGI-116
ILMN_1742866	NM_001992.2	F2R	2149	F2R	-2.06732	0.309684	0.193142	0.179751	1.68102e-10	1.03384e-08	-0.936181	0.351116	0.290942	0.27617	0.00819043	0.108291	coagulation factor II (thrombin) receptor (F2R), mRNA.	PAR1; TR; HTR; CF2R
ILMN_1661717	NM_007111.3	TFDP1	7027	TFDP1	-2.52684	0.378654	0.193054	0.179661	1.70389e-10	1.04654e-08	-1.64526	0.369898	0.325535	0.311484	1.32718e-05	0.0012094	transcription factor Dp-1 (TFDP1), mRNA.	DP1; DRTF1; Dp-1
ILMN_1707475	NM_152653.2	UBE2E2	7325	UBE2E2	-2.0716	0.310466	0.193027	0.179634	1.71077e-10	1.04941e-08	-1.40408	0.298559	0.331539	0.317613	4.33084e-06	0.000534404	ubiquitin-conjugating enzyme E2E 2 (UBC4/5 homolog, yeast) (UBE2E2), mRNA.	UBCH8; FLJ25157
ILMN_3238058	NR_024275.1	LOC151162	151162	MGAT5	-2.33577	0.350107	0.192992	0.179598	1.71992e-10	1.05365e-08	-1.46417	0.347233	0.320294	0.306134	3.51447e-05	0.00251381	hypothetical LOC151162 (LOC151162), non-coding RNA.
ILMN_2151817	NM_005022.2	PFN1	5216	PFN1	-1.88784	0.283004	0.19296	0.179565	1.72858e-10	1.05758e-08	-1.10981	0.288157	0.312434	0.298109	0.000150726	0.00704011	profilin 1 (PFN1), mRNA.
ILMN_2167416	NM_001531.1	MR1	3140	MR1	-2.59081	0.388521	0.192871	0.179475	1.75211e-10	1.06922e-08	-1.63431	0.38429	0.3211	0.306956	3.02632e-05	0.00223635	major histocompatibility complex, class I-related (MR1), mRNA.	HLALS
ILMN_2316878	NM_030671.1	PTPRO	5800	PTPRO	-2.88006	0.43198	0.192823	0.179426	1.76487e-10	1.07562e-08	-1.65413	0.444012	0.309848	0.29547	0.000243142	0.00986207	protein tyrosine phosphatase, receptor type, O (PTPRO), transcript variant 5, mRNA.	GLEPP1; PTP-U2; PTPU2
ILMN_1773002	XM_001125098.1	LOC730417	730417	C10orf140	-1.54824	0.232274	0.192764	0.179366	1.78075e-10	1.0839e-08	-1.00544	0.227065	0.325076	0.311015	1.44551e-05	0.00127108	PREDICTED: hypothetical protein LOC730417 (LOC730417), mRNA.
ILMN_1702691	NM_006290.2	TNFAIP3	7128	TNFAIP3	-3.70089	0.555545	0.19262	0.17922	1.82032e-10	1.10656e-08	-2.19042	0.563765	0.313141	0.298832	0.00013223	0.00648048	tumor necrosis factor, alpha-induced protein 3 (TNFAIP3), mRNA.	A20; MGC138687; OTUD7C; TNFA1P2; MGC104522; MGC138688
ILMN_2267914	NM_001251.2	CD68	968	CD68	-1.41291	0.212113	0.192596	0.179195	1.82702e-10	1.1092e-08	-0.883183	0.210501	0.319827	0.305657	3.83275e-05	0.00267354	CD68 molecule (CD68), transcript variant 1, mRNA.	DKFZp686M18236; SCARD1; GP110
ILMN_2232177	NM_001102.2	ACTN1	87	ACTN1	-1.35913	0.204131	0.192485	0.179082	1.85823e-10	1.12671e-08	-0.795482	0.20806	0.311852	0.297515	0.000167855	0.00753898	actinin, alpha 1 (ACTN1), mRNA.	FLJ40884
ILMN_2242463	NM_001814.2	CTSC	1075	CTSC	-1.17513	0.176503	0.192475	0.179072	1.86117e-10	1.12705e-08	-0.767147	0.172132	0.32574	0.311693	1.27752e-05	0.00119169	cathepsin C (CTSC), transcript variant 1, mRNA.	JPD; DPP1; JP; HMS; CPPI; PALS; PLS; DPPI
ILMN_1672571	NM_012143.2	TFIP11	24144	TFIP11	-2.61894	0.393422	0.192435	0.179032	1.87243e-10	1.13096e-08	-1.48191	0.406599	0.308227	0.293815	0.00032821	0.0122223	tuftelin interacting protein 11 (TFIP11), transcript variant 2, mRNA.	FLJ22086; TIP39; bK445C9.6
ILMN_1805693	NM_016573.1	GMIP	51291	GMIP	-3.03637	0.456175	0.192411	0.179007	1.87947e-10	1.13377e-08	-1.80605	0.461826	0.313673	0.299374	0.000119841	0.00601674	GEM interacting protein (GMIP), mRNA.
ILMN_1661500	NM_003778.3	B4GALT4	8702	B4GALT4	-3.14578	0.472639	0.192396	0.178992	1.88356e-10	1.13479e-08	-1.92931	0.472541	0.317353	0.303131	6.06298e-05	0.00369513	UDP-Gal:betaGlcNAc beta 1,4- galactosyltransferase, polypeptide 4 (B4GALT4), transcript variant 2, mRNA.	B4Gal-T4; beta4Gal-T4
ILMN_1671494	NM_003481.2	USP5	8078	USP5	-1.75929	0.264368	0.192355	0.17895	1.89539e-10	1.14022e-08	-1.09926	0.262316	0.319716	0.305543	3.91276e-05	0.00272533	ubiquitin specific peptidase 5 (isopeptidase T) (USP5), transcript variant 2, mRNA.	ISOT
ILMN_1718982	NM_004183.2	BEST1	7439	BEST1	-3.36025	0.505648	0.192006	0.178596	1.99891e-10	1.19818e-08	-2.06487	0.504864	0.317507	0.303289	5.89191e-05	0.00361417	bestrophin 1 (BEST1), mRNA.	BEST; VMD2; TU15B; ARB; BMD
ILMN_1732919	NM_006840.3	LILRB5	10990	LILRB5	-3.19666	0.48113	0.191955	0.178544	2.01457e-10	1.20475e-08	-1.83456	0.49392	0.309623	0.29524	0.000253492	0.010176	leukocyte immunoglobulin-like receptor, subfamily B (with TM and ITIM domains), member 5 (LILRB5), transcript variant 2, mRNA.	LIR8; LIR-8; CD85C
ILMN_1679195	NM_199483.1	C20orf24	55969	C20orf24,TGIF2-C20ORF24	-1.35159	0.20343	0.191954	0.178542	2.01496e-10	1.20475e-08	-0.866513	0.199692	0.323048	0.308945	2.10766e-05	0.00170485	chromosome 20 open reading frame 24 (C20orf24), transcript variant 2, mRNA.	PNAS-11; RIP5
ILMN_2335557	NM_030569.3	ITIH5	80760	ITIH5	-1.82604	0.275178	0.191646	0.178229	2.11178e-10	1.25471e-08	-1.14524	0.27238	0.320025	0.305859	3.69446e-05	0.00260785	inter-alpha (globulin) inhibitor H5 (ITIH5), transcript variant 1, mRNA.	DKFZp686F0145; pp14776; MGC10848
ILMN_1806692	NM_000521.2	HEXB	3074	HEXB	-1.41021	0.21298	0.1911	0.177674	2.29472e-10	1.3532e-08	-0.831878	0.215892	0.312471	0.298148	0.000149672	0.00700156	hexosaminidase B (beta polypeptide) (HEXB), mRNA.	ENC-1AS
ILMN_2373285	NM_138716.2	MSR1	4481	MSR1	-1.74143	0.263137	0.190972	0.177544	2.3399e-10	1.3747e-08	-1.03049	0.266343	0.3128	0.298484	0.000140837	0.00676218	macrophage scavenger receptor 1 (MSR1), transcript variant SR-AIII, mRNA.	SR-A; SCARA1; phSR2; phSR1; CD204
ILMN_1667224	NM_020125.2	SLAMF8	56833	SLAMF8	-2.45582	0.371538	0.190668	0.177235	2.45056e-10	1.43615e-08	-1.65205	0.357511	0.329587	0.31562	6.2369e-06	0.000703981	SLAM family member 8 (SLAMF8), mRNA.	SBBI42; MGC129578; FLJ20442; BLAME
ILMN_1774229	NM_004173.2	SLC7A4	6545	SLC7A4	-2.36908	0.358551	0.190574	0.17714	2.48572e-10	1.45315e-08	-1.59446	0.34492	0.329628	0.315662	6.18955e-06	0.000700307	solute carrier family 7 (cationic amino acid transporter, y+ system), member 4 (SLC7A4), mRNA.	CAT-4; MGC129977; CAT4; HCAT3; VH; MGC129976
ILMN_2109416	NR_002798.1	NAPSB	256236	NAPSB	-1.62145	0.245414	0.190561	0.177126	2.49099e-10	1.45443e-08	-1.06027	0.23868	0.325405	0.311351	1.3598e-05	0.00122031	napsin B aspartic peptidase pseudogene (NAPSB), non-coding RNA. XR_001413	NAPB; NAP1L; NAP2
ILMN_1723004	NM_001782.1	CD72	971	CD72	-3.91124	0.592416	0.19038	0.176942	2.56049e-10	1.49316e-08	-2.26353	0.604434	0.310243	0.295873	0.000226015	0.00937246	CD72 molecule (CD72), mRNA.	LYB2; CD72b
ILMN_1781983	NM_145730.1	AP1B1	162	AP1B1	-2.23257	0.338313	0.190265	0.176825	2.6056e-10	1.51573e-08	-1.42631	0.331882	0.322108	0.307985	2.5101e-05	0.00192952	adaptor-related protein complex 1, beta 1 subunit (AP1B1), transcript variant 2, mRNA.	CLAPB2; ADTB1; BAM22; AP105A
ILMN_1768867	NM_003664.3	AP3B1	8546	AP3B1	-2.89922	0.439355	0.190253	0.176813	2.61017e-10	1.51653e-08	-1.89691	0.427062	0.325395	0.31134	1.36238e-05	0.00122031	adaptor-related protein complex 3, beta 1 subunit (AP3B1), mRNA.	ADTB3; ADTB3A; HPS; PE; HPS2
ILMN_1719286	NM_000308.2	CTSA	5476	CTSA	-1.94041	0.294066	0.190243	0.176803	2.6141e-10	1.51695e-08	-1.18164	0.293935	0.315997	0.301747	7.79381e-05	0.00441438	cathepsin A (CTSA), transcript variant 1, mRNA.	NGBE; PPCA; GSL; PPGB; GLB2
ILMN_1708167	NM_178181.1	CDCP1	64866	CDCP1	-4.80223	0.727877	0.190207	0.176766	2.62859e-10	1.52176e-08	-2.73837	0.746839	0.308665	0.294262	0.000302654	0.0115579	CUB domain containing protein 1 (CDCP1), transcript variant 2, mRNA.	SIMA135; TRASK; CD318
ILMN_2384181	NM_005771.3	DHRS9	10170	DHRS9	-0.888724	0.134705	0.190206	0.176766	2.62883e-10	1.52176e-08	-0.553019	0.133497	0.318656	0.304462	4.76186e-05	0.00313659	dehydrogenase/reductase (SDR family) member 9 (DHRS9), transcript variant 1, mRNA.	RDHL; 3alpha-HSD; RETSDR8; RDH15
ILMN_2078599	NM_001611.2	ACP5	54	ACP5	-0.826789	0.125338	0.190165	0.176723	2.64561e-10	1.52773e-08	-0.524367	0.123289	0.321108	0.306964	3.02196e-05	0.00223635	acid phosphatase 5, tartrate resistant (ACP5), mRNA.	TRAP; MGC117378
ILMN_2193591	NM_030930.2	UNC93B1	81622	UNC93B1	-1.71112	0.259481	0.190086	0.176644	2.67723e-10	1.54223e-08	-1.06015	0.257552	0.318081	0.303874	5.29801e-05	0.00339058	unc-93 homolog B1 (C. elegans) (UNC93B1), mRNA.	UNC93B; UNC93; MGC126617
ILMN_1769129	NM_006274.2	CCL19	6363	CCL19	-0.805874	0.122226	0.190046	0.176602	2.69389e-10	1.54994e-08	-0.467637	0.124501	0.310472	0.296107	0.000216659	0.00907588	chemokine (C-C motif) ligand 19 (CCL19), mRNA.	MIP3B; CKb11; MIP-3b; ELC; MGC34433; SCYA19
ILMN_2145280	NM_022047.2	DEF6	50619	DEF6	-2.314	0.351001	0.190019	0.176576	2.70472e-10	1.55428e-08	-1.35596	0.356126	0.311526	0.297182	0.00017829	0.00790998	differentially expressed in FDCP 6 homolog (mouse) (DEF6), mRNA.	IBP
ILMN_2152131	NM_001101.2	ACTB	60	ACTB	-1.56967	0.238408	0.189696	0.176247	2.84077e-10	1.62456e-08	-0.924519	0.241271	0.312029	0.297696	0.000162455	0.00740185	actin, beta (ACTB), mRNA.	PS1TP5BP1; beta-actin
ILMN_1790978	NM_006395.1	ATG7	10533	ATG7	-2.31836	0.35226	0.189599	0.176149	2.88296e-10	1.6467e-08	-1.46947	0.346341	0.320877	0.306729	3.15414e-05	0.00230559	ATG7 autophagy related 7 homolog (S. cerevisiae) (ATG7), mRNA.	APG7L; DKFZp434N0735; GSA7
ILMN_2366334	NM_031471.4	FERMT3	83706	FERMT3	-1.93013	0.29337	0.189516	0.176064	2.91967e-10	1.66566e-08	-1.04247	0.307204	0.303363	0.28885	0.000807372	0.0230718	fermitin family homolog 3 (Drosophila) (FERMT3), transcript variant URP2SF, mRNA.	MIG-2; KIND3; MIG2B; URP2; UNC112C; MGC10966
ILMN_2413644	NM_138461.2	TM4SF19	116211	TM4SF19	-0.581047	0.0883297	0.189478	0.176025	2.93666e-10	1.67059e-08	-0.35737	0.0878518	0.317028	0.3028	6.439e-05	0.00386897	transmembrane 4 L six family member 19 (TM4SF19), mRNA.	OCTM4
ILMN_1741404	NM_005098.3	MSC	9242	MSC	-1.0839	0.164818	0.18941	0.175957	2.96693e-10	1.68449e-08	-0.605025	0.170309	0.30641	0.291961	0.000459271	0.015774	musculin (activated B-cell factor-1) (MSC), mRNA.	ABF-1; ABF1; MYOR
ILMN_2148452	NM_005872.2	BCAS2	10286	BCAS2	-4.62084	0.703092	0.189253	0.175797	3.03866e-10	1.71084e-08	-2.65246	0.718297	0.309188	0.294796	0.00027472	0.0107912	breast carcinoma amplified sequence 2 (BCAS2), mRNA.	DAM1
ILMN_1777881	NM_012171.1	TSPAN17	26262	TSPAN17	-2.11861	0.322853	0.188878	0.175415	3.217e-10	1.80695e-08	-1.30361	0.320788	0.316939	0.302709	6.54605e-05	0.00389043	tetraspanin 17 (TSPAN17), transcript variant 1, mRNA.	FBX23; MGC14859; TM4SF17; FBXO23; MGC71255
ILMN_2124471	NM_078483.2	SLC36A1	206358	SLC36A1	-2.845	0.433779	0.188746	0.175281	3.28209e-10	1.83479e-08	-1.6445	0.441563	0.309825	0.295447	0.000244188	0.00988754	solute carrier family 36 (proton/amino acid symporter), member 1 (SLC36A1), mRNA.	TRAMD3; PAT1; LYAAT1
ILMN_1698777	NM_020421.2	ADCK1	57143	ADCK1	-3.36156	0.512617	0.188709	0.175244	3.30044e-10	1.84287e-08	-2.17779	0.4993	0.323558	0.309466	1.91699e-05	0.00159336	aarF domain containing kinase 1 (ADCK1), mRNA.	FLJ39600
ILMN_1671565	NM_003730.3	RNASET2	8635	RNASET2	-0.925812	0.14124	0.188605	0.175138	3.35309e-10	1.86587e-08	-0.536886	0.143558	0.310141	0.295769	0.000230317	0.00948835	ribonuclease T2 (RNASET2), mRNA.	RP11-514O12.3; RNASE6PL; bA514O12.3
ILMN_1690682	NM_003782.3	B3GALT4	8705	B3GALT4	-3.71879	0.567543	0.188514	0.175045	3.3998e-10	1.88721e-08	-2.33028	0.559707	0.319115	0.30493	4.37374e-05	0.00294661	UDP-Gal:betaGlcNAc beta 1,3-galactosyltransferase, polypeptide 4 (B3GALT4), mRNA.	beta3GALT4; beta3Gal-T4; DJ1033B10.3; GalT4; Gal-T2
ILMN_3249667	XM_001719804.1	LOC100133678	100133678	HLA-DQA2	-0.54588	0.0833544	0.188381	0.174911	3.46869e-10	1.91645e-08	-0.329935	0.0833382	0.314693	0.300416	9.92125e-05	0.00524263	PREDICTED: similar to hCG2042724 (LOC100133678), partial mRNA.
ILMN_2387599	NM_018840.2	C20orf24	55969	C20orf24,TGIF2-C20ORF24	-1.3691	0.209239	0.188169	0.174694	3.58255e-10	1.97474e-08	-0.863562	0.205746	0.319862	0.305693	3.80763e-05	0.00265996	chromosome 20 open reading frame 24 (C20orf24), transcript variant 1, mRNA.	PNAS-11; RIP5
ILMN_2117987	NM_007111.3	TFDP1	7027	TFDP1	-2.29654	0.3514	0.187876	0.174397	3.74509e-10	2.05715e-08	-1.43664	0.34649	0.318738	0.304545	4.69025e-05	0.00311546	transcription factor Dp-1 (TFDP1), mRNA.	DP1; DRTF1; Dp-1
ILMN_1763129	NM_024096.1	DCTPP1	79077	DCTPP1	-2.93926	0.449843	0.187823	0.174343	3.77556e-10	2.06908e-08	-1.79824	0.447304	0.315999	0.301749	7.79066e-05	0.00441438	dCTP pyrophosphatase 1 (DCTPP1), mRNA.	RS21C6; CDA03; MGC5627
ILMN_1662839	NM_001001974.1	PLEKHA1	59338	PLEKHA1	-2.27741	0.349196	0.187369	0.173882	4.0442e-10	2.19953e-08	-1.33336	0.352901	0.310925	0.29657	0.000199227	0.00852674	pleckstrin homology domain containing, family A (phosphoinositide binding specific) member 1 (PLEKHA1), transcript variant 2, mRNA.	TAPP1
ILMN_2046730	NM_002966.2	S100A10	6281	S100A10	-1.43386	0.219914	0.187304	0.173815	4.08473e-10	2.21541e-08	-0.843556	0.221811	0.311433	0.297088	0.000181366	0.00800143	S100 calcium binding protein A10 (S100A10), mRNA.	ANX2L; MGC111133; GP11; ANX2LG; p10; P11; Ca[1]; CAL1L; 42C; CLP11
ILMN_1676336	NM_020792.3	AADACL1	57552	NCEH1	-1.07769	0.165293	0.187295	0.173806	4.09026e-10	2.21586e-08	-0.650984	0.165039	0.314385	0.300101	0.00010505	0.00546563	arylacetamide deacetylase-like 1 (AADACL1), mRNA.
ILMN_1733415	NM_003480.2	MFAP5	8076	MFAP5	-0.661265	0.101476	0.187168	0.173677	4.16945e-10	2.2536e-08	-0.391383	0.102093	0.312064	0.297732	0.00016139	0.00737978	microfibrillar associated protein 5 (MFAP5), mRNA.	MAGP2; MP25
ILMN_1770787	NM_013974.1	DDAH2	23564	DDAH2	-2.16472	0.332274	0.187107	0.173615	4.2081e-10	2.2693e-08	-1.38945	0.324183	0.321845	0.307717	2.63545e-05	0.00201034	dimethylarginine dimethylaminohydrolase 2 (DDAH2), mRNA.	DDAHII; NG30; G6a; DDAH
ILMN_1704024	NM_017854.1	TMEM160	54958	TMEM160	-1.72293	0.264493	0.187079	0.173586	4.22628e-10	2.27651e-08	-0.98108	0.270041	0.307996	0.29358	0.000342482	0.0126443	transmembrane protein 160 (TMEM160), mRNA.	FLJ20512
ILMN_1757827	NM_030796.2	ECOP	81552	VOPP1	-3.72214	0.57185	0.186887	0.173391	4.35113e-10	2.33844e-08	-2.31734	0.564165	0.317891	0.30368	5.48788e-05	0.0034656	EGFR-coamplified and overexpressed protein (ECOP), mRNA.	FLJ20532; DKFZP564K0822
ILMN_2148819	NM_006009.2	TUBA1A	7846	TUBA1A	-1.46001	0.224389	0.1868	0.173303	4.40873e-10	2.36402e-08	-0.906348	0.22159	0.317513	0.303294	5.88623e-05	0.00361417	tubulin, alpha 1a (TUBA1A), mRNA.	LIS3; FLJ25113; TUBA3; B-ALPHA-1
ILMN_3235964	NR_024151.1	HSPA7	3311	HSPA7	-2.1869	0.336172	0.18675	0.173252	4.44205e-10	2.37113e-08	-1.22904	0.344756	0.306654	0.292209	0.000439045	0.015279	heat shock 70kDa protein 7 (HSP70B) (HSPA7), non-coding RNA.
ILMN_1752355	XM_166227.6	MPEG1	219972	MPEG1	-4.05562	0.623681	0.186654	0.173155	4.50717e-10	2.39508e-08	-2.74371	0.596659	0.329054	0.315076	6.88944e-06	0.000764857	PREDICTED: macrophage expressed gene 1, transcript variant 1 (MPEG1), mRNA.
ILMN_1667418	XM_208930.4	LOC283953	283953	TMEM114	-2.28007	0.350626	0.186659	0.17316	4.50381e-10	2.39508e-08	-1.36546	0.350913	0.313264	0.298957	0.000129269	0.00638826	PREDICTED: hypothetical LOC283953 (LOC283953), mRNA.
ILMN_1716279	NM_001813.2	CENPE	1062	CENPE	-4.55113	0.7003	0.186509	0.173007	4.60728e-10	2.44005e-08	-3.00399	0.675839	0.325465	0.311413	1.34456e-05	0.0012182	centromere protein E, 312kDa (CENPE), mRNA.	KIF10
ILMN_2128428	NM_001343.1	DAB2	1601	DAB2	-1.19419	0.183904	0.186312	0.172807	4.74651e-10	2.50258e-08	-0.690783	0.186395	0.309456	0.29507	0.000261435	0.0104517	disabled homolog 2, mitogen-responsive phosphoprotein (Drosophila) (DAB2), mRNA.	FLJ26626; DOC2; DOC-2
ILMN_3240316	NM_183049.2	TMSL3	7117	TMSB4X	-1.40442	0.216318	0.18627	0.172764	4.77737e-10	2.51605e-08	-0.740315	0.227108	0.300891	0.286326	0.00127672	0.0317463	thymosin-like 3 (TMSL3), mRNA.
ILMN_1680874	NM_178012.3	TUBB2B	347733	TUBB2B	-0.700919	0.107989	0.186204	0.172697	4.82529e-10	2.53846e-08	-0.409254	0.109045	0.31041	0.296044	0.00021915	0.00914469	tubulin, beta 2B (TUBB2B), mRNA.	MGC8685; DKFZp566F223; RP11-506K6.1; TUBB-PARALOG; bA506K6.1
ILMN_1723467	NM_002211.2	ITGB1	3688	ITGB1	-1.72079	0.265489	0.185866	0.172353	5.07878e-10	2.66292e-08	-1.00958	0.267455	0.310853	0.296496	0.000201915	0.00860304	integrin, beta 1 (fibronectin receptor, beta polypeptide, antigen CD29 includes MDF2, MSK12) (ITGB1), transcript variant 1A, mRNA.	GPIIA; VLAB; MDF2; FNRB; CD29; MSK12
ILMN_2359945	NM_001025195.1	CES1	1066	CES1	-0.457692	0.0706491	0.185746	0.172232	5.17122e-10	2.70839e-08	-0.297306	0.0685238	0.323036	0.308933	2.11234e-05	0.00170485	carboxylesterase 1 (monocyte/macrophage serine esterase 1) (CES1), transcript variant 1, mRNA.	HMSE1; PCE-1; CES2; TGH; SES1; HMSE; ACAT; MGC117365; CEH
ILMN_1715173	NM_002953.3	RPS6KA1	6195	RPS6KA1	-1.77856	0.274783	0.185531	0.172012	5.34293e-10	2.79214e-08	-1.09089	0.272121	0.315757	0.301502	8.14872e-05	0.00453395	ribosomal protein S6 kinase, 90kDa, polypeptide 1 (RPS6KA1), transcript variant 1, mRNA.	HU-1; MAPKAPK1A; RSK; S6K-alpha 1; RSK1
ILMN_1682176	NM_003278.1	CLEC3B	7123	CLEC3B	-1.07228	0.16568	0.185508	0.17199	5.36089e-10	2.79814e-08	-0.553316	0.17505	0.299116	0.284515	0.00177516	0.0393967	C-type lectin domain family 3, member B (CLEC3B), mRNA.	TN; TNA; DKFZp686H17246
ILMN_1765801	NM_000152.3	GAA	2548	GAA	-2.53682	0.39229	0.185311	0.171789	5.52342e-10	2.87692e-08	-1.46891	0.396803	0.309373	0.294985	0.000265512	0.0105382	glucosidase, alpha; acid (GAA), transcript variant 1, mRNA.	LYAG
ILMN_1770433	NM_002649.2	PIK3CG	5294	PIK3CG	-2.82921	0.437597	0.18526	0.171737	5.56651e-10	2.89618e-08	-1.59382	0.447178	0.306638	0.292193	0.000440303	0.0152891	phosphoinositide-3-kinase, catalytic, gamma polypeptide (PIK3CG), mRNA.	PIK3; PI3K; PI3CG; PI3Kgamma
ILMN_1732151	NM_001848.2	COL6A1	1291	COL6A1	-0.937708	0.145353	0.184735	0.171203	6.02623e-10	3.11821e-08	-0.554181	0.145778	0.311403	0.297057	0.000182389	0.00802412	collagen, type VI, alpha 1 (COL6A1), mRNA.	OPLL
ILMN_1795317	NM_016558.2	SCAND1	51282	SCAND1	-3.50353	0.543167	0.184696	0.171164	6.06185e-10	3.12979e-08	-2.32358	0.522359	0.325544	0.311493	1.32505e-05	0.0012094	SCAN domain containing 1 (SCAND1), transcript variant 1, mRNA.	RAZ1; SDP1
ILMN_1753490	NM_194303.1	C10orf39	282973	JAKMIP3	-3.43323	0.532702	0.184501	0.170965	6.24336e-10	3.21649e-08	-2.06603	0.53052	0.31333	0.299024	0.00012769	0.00633018	chromosome 10 open reading frame 39 (C10orf39), mRNA.	FLJ37857
ILMN_1754076	NM_018398.2	CACNA2D3	55799	CACNA2D3	-4.43907	0.688914	0.18445	0.170914	6.29111e-10	3.23404e-08	-2.5353	0.699426	0.307833	0.293412	0.000353019	0.0129324	calcium channel, voltage-dependent, alpha 2/delta subunit 3 (CACNA2D3), mRNA.	HSA272268
ILMN_1711748	NM_006227.2	PLTP	5360	PLTP	-1.97441	0.30659	0.184313	0.170775	6.42275e-10	3.29813e-08	-1.3076	0.294882	0.325223	0.311165	1.40673e-05	0.00124588	phospholipid transfer protein (PLTP), transcript variant 1, mRNA.	HDLCQ9
ILMN_2056975	NM_000194.1	HPRT1	3251	HPRT1	-2.12755	0.330409	0.184285	0.170746	6.45028e-10	3.30867e-08	-1.13523	0.343899	0.301646	0.287097	0.00110982	0.0286663	hypoxanthine phosphoribosyltransferase 1 (Lesch-Nyhan syndrome) (HPRT1), mRNA.	HPRT; HGPRT
ILMN_1739792	NM_001665.3	RHOG	391	RHOG	-1.58057	0.245737	0.184019	0.170476	6.71474e-10	3.42945e-08	-1.03107	0.237548	0.323076	0.308974	2.0967e-05	0.00170088	ras homolog gene family, member G (rho G) (RHOG), mRNA.	MGC125836; MGC125835; ARHG
ILMN_1700143	XM_114303.3	FRMD4B	23150	FRMD4B	-4.31269	0.670675	0.183959	0.170415	6.77585e-10	3.45692e-08	-2.54926	0.671802	0.311261	0.296912	0.000187232	0.00813126	PREDICTED: FERM domain containing 4B, transcript variant 1 (FRMD4B), mRNA.
ILMN_1709630	NM_174923.1	CCDC107	203260	CCDC107	-1.86862	0.290823	0.18377	0.170223	6.97203e-10	3.55318e-08	-1.12807	0.288998	0.31352	0.299218	0.000123284	0.00616996	coiled-coil domain containing 107 (CCDC107), mRNA.	MGC31967; RP11-331F9.6
ILMN_2170814	NM_014398.2	LAMP3	27074	LAMP3	-3.16443	0.492588	0.183726	0.170178	7.01883e-10	3.57051e-08	-2.11809	0.471754	0.326508	0.312477	1.10743e-05	0.00106731	lysosomal-associated membrane protein 3 (LAMP3), mRNA.	TSC403; DC-LAMP; CD208; LAMP; DCLAMP
ILMN_1692133	NM_001032372.1	ZNF226	7769	ZNF226	-2.78614	0.433794	0.183675	0.170126	7.07273e-10	3.58903e-08	-1.7665	0.423451	0.319297	0.305116	4.22845e-05	0.00287328	zinc finger protein 226 (ZNF226), transcript variant 1, mRNA.
ILMN_2216157	NM_007353.2	GNA12	2768	GNA12	-1.90607	0.296914	0.183559	0.170008	7.19756e-10	3.64456e-08	-1.12646	0.297258	0.311155	0.296804	0.000190933	0.00824657	guanine nucleotide binding protein (G protein) alpha 12 (GNA12), mRNA.	RMP; NNX3; gep; MGC99644; MGC104623
ILMN_2124769	NM_004559.3	YBX1	4904	YBX1	-2.30584	0.359325	0.183467	0.169915	7.29796e-10	3.69144e-08	-1.52301	0.345641	0.324579	0.310508	1.58551e-05	0.00137336	Y box binding protein 1 (YBX1), mRNA.	DBPB; MGC117250; NSEP-1; YB-1; CSDB; MGC104858; BP-8; YB1; NSEP1; CSDA2; MGC110976; MDR-NF1
ILMN_1783247	NM_032024.3	C10orf11	83938	C10orf11	-2.02937	0.316497	0.183275	0.16972	7.51289e-10	3.79205e-08	-1.51209	0.292367	0.343146	0.329462	4.8872e-07	0.000119759	chromosome 10 open reading frame 11 (C10orf11), mRNA.	CDA017
ILMN_1740269	NM_024494.1	WNT2B	7482	WNT2B	-1.99991	0.312283	0.182986	0.169426	7.84782e-10	3.93589e-08	-1.31491	0.300728	0.323803	0.309716	1.83174e-05	0.00153814	wingless-type MMTV integration site family, member 2B (WNT2B), transcript variant WNT-2B2, mRNA.	WNT13; XWNT2
ILMN_1803213	NM_015419.2	MXRA5	25878	MXRA5	-0.670726	0.104848	0.182725	0.16916	8.16346e-10	4.08986e-08	-0.480148	0.0980821	0.336219	0.32239	1.80219e-06	0.000288924	matrix-remodelling associated 5 (MXRA5), mRNA.	DKFZp564I1922
ILMN_1655611	NM_173485.4	TSHZ2	128553	TSHZ2	-1.21627	0.190186	0.182651	0.169085	8.25458e-10	4.12677e-08	-0.661454	0.195955	0.303028	0.288508	0.000859091	0.0239836	teashirt zinc finger homeobox 2 (TSHZ2), mRNA.	TSH2; ZNF218; FLJ33887; DKFZp686K2480; C20orf17; ZABC2; OVC10-2
ILMN_2160929	NM_004111.4	FEN1	2237	FEN1	-2.76166	0.431905	0.182614	0.169047	8.3015e-10	4.14584e-08	-2.01207	0.401703	0.339033	0.325263	1.06176e-06	0.000198478	flap structure-specific endonuclease 1 (FEN1), mRNA.	RAD2; FEN-1; MF1
ILMN_1731181	NM_018469.3	TEX2	55852	TEX2	-1.72973	0.270693	0.18246	0.168891	8.49605e-10	4.2296e-08	-1.14481	0.259946	0.324526	0.310454	1.60131e-05	0.00137946	testis expressed 2 (TEX2), mRNA.	KIAA1738; TMEM96; DKFZp781G0721; HT008
ILMN_1709750	NM_022486.3	SUSD1	64420	SUSD1	-1.70387	0.266639	0.182467	0.168898	8.48726e-10	4.2296e-08	-0.968438	0.27029	0.307007	0.292569	0.000411305	0.014495	sushi domain containing 1 (SUSD1), mRNA.	RP11-4O1.1
ILMN_1755024	NM_014002.2	IKBKE	9641	IKBKE	-4.87981	0.763941	0.182375	0.168804	8.60635e-10	4.28001e-08	-2.97097	0.75539	0.314144	0.299855	0.000109839	0.00565259	inhibitor of kappa light polypeptide gene enhancer in B-cells, kinase epsilon (IKBKE), mRNA.	MGC125295; MGC125297; IKKI; MGC125294; IKK-i; IKKE; KIAA0151
ILMN_1659437	NM_032731.3	TXNDC17	84817	TXNDC17	-2.21581	0.346998	0.1823	0.168728	8.70422e-10	4.3196e-08	-1.44711	0.334706	0.322692	0.308581	2.2519e-05	0.00178994	thioredoxin domain containing 17 (TXNDC17), mRNA.	TRP14; MGC14353; TXNL5
ILMN_1805410	NM_032413.2	C15orf48	84419	C15orf48	-2.46571	0.386318	0.182186	0.168613	8.85419e-10	4.38797e-08	-1.5226	0.379981	0.315718	0.301462	8.2068e-05	0.00456008	chromosome 15 open reading frame 48 (C15orf48), transcript variant 2, mRNA.	FLJ22645; MGC32925; NMES1; FOAP-11
ILMN_1735996	NM_016931.2	NOX4	50507	NOX4	-1.32662	0.208011	0.182002	0.168426	9.10308e-10	4.49895e-08	-0.814233	0.204993	0.31497	0.300699	9.42598e-05	0.00506582	NADPH oxidase 4 (NOX4), mRNA.	RENOX; KOX; KOX-1
ILMN_1803338	NM_199511.1	CCDC80	151887	CCDC80	-1.0366	0.162536	0.182002	0.168425	9.10368e-10	4.49895e-08	-0.695063	0.155321	0.326163	0.312125	1.18074e-05	0.00111907	coiled-coil domain containing 80 (CCDC80), transcript variant 1, mRNA.	URB; DRO1; okuribin; MGC131805; MGC134851; SSG1
ILMN_1669376	NM_018370.2	DRAM1	55332	DRAM1	-2.2161	0.347599	0.181921	0.168343	9.21567e-10	4.54479e-08	-1.32349	0.345861	0.311921	0.297586	0.00016573	0.00747905	DNA-damage regulated autophagy modulator 1 (DRAM1), mRNA.	FLJ11259
ILMN_2141118	NM_001039614.1	C15orf59	388135	C15orf59	-2.41935	0.379537	0.181885	0.168307	9.26525e-10	4.55974e-08	-1.62971	0.362085	0.326765	0.31274	1.05555e-05	0.00104002	chromosome 15 open reading frame 59 (C15orf59), mRNA.	MGC131524
ILMN_1694084	NM_017456.1	PSCD1	9267	CYTH1	-1.97388	0.310138	0.181516	0.167931	9.79539e-10	4.79073e-08	-0.9764	0.329683	0.295679	0.281006	0.00336732	0.0610553	pleckstrin homology, Sec7 and coiled-coil domains 1(cytohesin 1) (PSCD1), transcript variant 2, mRNA.	D17S811E; B2-1; CYTOHESIN-1; SEC7
ILMN_1763386	NM_197966.1	BID	637	BID	-2.47948	0.389653	0.181471	0.167886	9.86149e-10	4.8131e-08	-1.49275	0.386355	0.312689	0.29837	0.000143759	0.00684686	BH3 interacting domain death agonist (BID), transcript variant 1, mRNA.	MGC15319; FP497; MGC42355
ILMN_1715452	NM_144966.4	FREM1	158326	FREM1	-2.30051	0.361656	0.181388	0.167801	9.98655e-10	4.86804e-08	-1.46244	0.35178	0.318979	0.304791	4.48508e-05	0.00299661	FRAS1 related extracellular matrix 1 (FREM1), mRNA.	C9orf145; FLJ25461; C9orf143; C9orf154; QBRICK; RP11-439N12.3
ILMN_1716913	NM_021210.3	TRAPPC1	58485	TRAPPC1	-2.1166	0.333301	0.180995	0.167401	1.05954e-09	5.14477e-08	-1.29421	0.32847	0.314294	0.300008	0.000106832	0.00553396	trafficking protein particle complex 1 (TRAPPC1), mRNA.	BET5; MUM2
ILMN_1721391	NM_004047.3	ATP6V0B	533	ATP6V0B	-1.56049	0.245831	0.180898	0.167303	1.07502e-09	5.21458e-08	-1.0416	0.235042	0.325159	0.3111	1.42352e-05	0.00125839	ATPase, H+ transporting, lysosomal 21kDa, V0 subunit b (ATP6V0B), transcript variant 1, mRNA.	HATPL; ATP6F; VMA16
ILMN_1737308	NM_002064.1	GLRX	2745	GLRX	-1.19078	0.187648	0.180825	0.167229	1.08695e-09	5.26704e-08	-0.721752	0.185456	0.313276	0.298969	0.000128977	0.00638137	glutaredoxin (thioltransferase) (GLRX), mRNA.	GRX; GRX1; MGC117407
ILMN_1688423	NM_002001.2	FCER1A	2205	FCER1A	-0.925905	0.14593	0.180789	0.167192	1.09283e-09	5.29011e-08	-0.516138	0.148534	0.30491	0.290429	0.000606315	0.01889	Fc fragment of IgE, high affinity I, receptor for; alpha polypeptide (FCER1A), mRNA.	FCE1A; FcERI
ILMN_1673880	NM_004105.3	EFEMP1	2202	EFEMP1	-1.00005	0.157637	0.180758	0.16716	1.09805e-09	5.30995e-08	-0.55363	0.160833	0.304287	0.289793	0.0006804	0.0204051	EGF-containing fibulin-like extracellular matrix protein 1 (EFEMP1), transcript variant 1, mRNA.	FBNL; MLVT; FLJ35535; FBLN3; DRAD; S1-5; MGC111353; DHRD; MTLV
ILMN_1801516	NM_002081.1	GPC1	2817	GPC1	-2.50485	0.39485	0.18075	0.167153	1.09926e-09	5.31035e-08	-1.50874	0.391056	0.312574	0.298252	0.000146872	0.00694442	glypican 1 (GPC1), mRNA.	glypican; FLJ38078
ILMN_1738759	NM_015937.3	PIGT	51604	PIGT	-2.58797	0.408155	0.180634	0.167035	1.11867e-09	5.39863e-08	-1.50075	0.40959	0.308613	0.294209	0.000305552	0.0116257	phosphatidylinositol glycan anchor biosynthesis, class T (PIGT), mRNA.	MGC8909; NDAP; FLJ41596; CGI-06
ILMN_1785732	NM_007115.2	TNFAIP6	7130	TNFAIP6	-0.929515	0.146607	0.180617	0.167017	1.12153e-09	5.40692e-08	-0.48895	0.152247	0.30002	0.285437	0.00150073	0.0353815	tumor necrosis factor, alpha-induced protein 6 (TNFAIP6), mRNA.	TSG6
ILMN_2053921	NM_004930.2	CAPZB	832	CAPZB	-2.18657	0.345144	0.180434	0.166831	1.15295e-09	5.54704e-08	-1.4651	0.329433	0.325523	0.311471	1.33028e-05	0.00120989	capping protein (actin filament) muscle Z-line, beta (CAPZB), mRNA.	CAPB; MGC104401; MGC129749; MGC129750; CAPZ; CAPPB
ILMN_2153373	NM_006726.1	LRBA	987	LRBA	-3.25534	0.513972	0.180377	0.166773	1.16286e-09	5.58906e-08	-2.03564	0.502203	0.316715	0.30248	6.82294e-05	0.0040085	LPS-responsive vesicle trafficking, beach and anchor containing (LRBA), mRNA.	BGL; CDC4L; DKFZp686A09128; DKFZp686P2258; LBA; FLJ25686; MGC72098; LAB300; FLJ16600; DKFZp686K03100
ILMN_1659895	NM_002444.2	MSN	4478	MSN	-1.42614	0.225285	0.180254	0.166648	1.18451e-09	5.68734e-08	-0.675769	0.242274	0.292862	0.27813	0.00570644	0.0861412	moesin (MSN), mRNA.
ILMN_1654560	NM_006068.2	TLR6	10333		-2.61357	0.412894	0.180236	0.16663	1.18772e-09	5.69697e-08	-1.636	0.403229	0.316798	0.302565	6.71895e-05	0.0039674	toll-like receptor 6 (TLR6), mRNA.	CD286
ILMN_2355586	NM_139322.1	ATRN	8455	ATRN	-3.81567	0.602845	0.18022	0.166614	1.19064e-09	5.70517e-08	-2.83927	0.556234	0.341435	0.327715	6.75169e-07	0.000145143	attractin (ATRN), transcript variant 2, mRNA.	DPPT-L; MGC126754; MGCA; KIAA0548
ILMN_1789535	NM_205861.1	DHDDS	79947	DHDDS	-1.23223	0.194691	0.18021	0.166604	1.19237e-09	5.70768e-08	-0.766219	0.190564	0.316013	0.301763	7.77111e-05	0.00441438	dehydrodolichyl diphosphate synthase (DHDDS), transcript variant 2, mRNA.	HDS; DS; CIT; CPT; FLJ13102
ILMN_2103107	NM_014479.2	ADAMDEC1	27299	ADAMDEC1	-2.95593	0.467127	0.180162	0.166555	1.201e-09	5.74321e-08	-1.82812	0.458053	0.315376	0.301113	8.74352e-05	0.00478053	ADAM-like, decysin 1 (ADAMDEC1), mRNA.	M12.219
ILMN_1809013	NM_021019.3	MYL6	4637		-2.26275	0.357685	0.180097	0.166489	1.21285e-09	5.79398e-08	-1.63218	0.333223	0.336287	0.32246	1.77908e-06	0.000286953	myosin, light chain 6, alkali, smooth muscle and non-muscle (MYL6), transcript variant 1, mRNA.	MLC3NM; MLC1SM; LC17-NM; LC17-GI; ESMLC; LC17B; MLC3SM; LC17A
ILMN_1745034	NM_000617.1	SLC11A2	4891	SLC11A2	-1.91044	0.302393	0.179788	0.166174	1.27057e-09	6.03924e-08	-1.08435	0.305334	0.306388	0.291938	0.000461198	0.0158057	solute carrier family 11 (proton-coupled divalent metal ion transporters), member 2 (SLC11A2), mRNA.	FLJ37416; NRAMP2; DCT1; DMT1
ILMN_1740429	NM_000146.3	FTL	2512	FTL	-3.0757	0.487524	0.179459	0.16584	1.33499e-09	6.32635e-08	-1.91528	0.47652	0.315981	0.301731	7.81699e-05	0.00441693	ferritin, light polypeptide (FTL), mRNA.	MGC71996
ILMN_1677085	NM_005873.2	RGS19	10287	RGS19	-2.32788	0.369257	0.17929	0.165668	1.36939e-09	6.47639e-08	-1.22403	0.382501	0.299815	0.285227	0.00155922	0.0364336	regulator of G-protein signaling 19 (RGS19), transcript variant 1, mRNA.	RGSGAIP; GAIP
ILMN_2313901	NM_138821.1	PAM	5066	PAM	-1.6789	0.266585	0.179053	0.165427	1.41911e-09	6.68479e-08	-1.14103	0.252956	0.326996	0.312975	1.01109e-05	0.00100671	peptidylglycine alpha-amidating monooxygenase (PAM), transcript variant 3, mRNA.	PHM; PAL
ILMN_1802631	NM_000027.2	AGA	175	AGA	-2.26414	0.359568	0.179017	0.165391	1.42667e-09	6.71371e-08	-1.67464	0.33217	0.33985	0.326097	9.1029e-07	0.000180131	aspartylglucosaminidase (AGA), mRNA.	AGU; ASRG; GA
ILMN_2405642	NM_024887.2	DHDDS	79947	DHDDS	-1.1117	0.176566	0.178994	0.165368	1.4316e-09	6.73022e-08	-0.730219	0.16942	0.322389	0.308272	2.3824e-05	0.00186545	dehydrodolichyl diphosphate synthase (DHDDS), transcript variant 1, mRNA.	HDS; DS; CIT; CPT; FLJ13102
ILMN_1655867	NM_020386.2	HRASLS	57110	HRASLS	-2.46406	0.391523	0.178895	0.165266	1.45317e-09	6.8113e-08	-1.48923	0.386337	0.312503	0.29818	0.000148797	0.00698135	HRAS-like suppressor (HRASLS), mRNA.	HSD28; A-C1; H-REV107; HRASLS1
ILMN_1677603	NM_201442.1	C1S	716	C1S	-2.02064	0.321807	0.178362	0.164725	1.57423e-09	7.33513e-08	-1.20949	0.318364	0.311352	0.297005	0.000184123	0.00807556	complement component 1, s subcomponent (C1S), transcript variant 2, mRNA.
ILMN_1716547	NM_017567.2	NAGK	55577	NAGK	-1.75002	0.278743	0.178333	0.164695	1.5811e-09	7.34542e-08	-1.06235	0.274435	0.312843	0.298527	0.000139732	0.00672835	N-acetylglucosamine kinase (NAGK), mRNA.	GNK; HSA242910
ILMN_1678729	NM_001037633.1	SIL1	64374	SIL1	-1.9495	0.310632	0.178247	0.164608	1.6017e-09	7.42653e-08	-1.35766	0.292261	0.330166	0.316211	5.59794e-06	0.000649405	SIL1 homolog, endoplasmic reticulum chaperone (S. cerevisiae) (SIL1), transcript variant 1, mRNA.	MSS; BAP; ULG5
ILMN_1678143	NM_001175.4	ARHGDIB	397	ARHGDIB	-1.34015	0.213578	0.178203	0.164564	1.6122e-09	7.4533e-08	-0.711271	0.220069	0.300389	0.285814	0.00140147	0.0337308	Rho GDP dissociation inhibitor (GDI) beta (ARHGDIB), mRNA.	Ly-GDI; RAP1GN1; GDIA2; D4; LYGDI; GDID4
ILMN_1785005	NM_000631.3	NCF4	4689	NCF4	-1.39432	0.222313	0.178098	0.164457	1.63785e-09	7.55713e-08	-0.811501	0.221959	0.308454	0.294047	0.000314662	0.0119053	neutrophil cytosolic factor 4, 40kDa (NCF4), transcript variant 1, mRNA.	SH3PXD4; P40PHOX; NCF; MGC3810
ILMN_1667371	NM_006748.1	SLA	6503	SLA	-1.17739	0.187819	0.177985	0.164341	1.66605e-09	7.67974e-08	-0.720072	0.18437	0.313566	0.299265	0.00012224	0.00612415	Src-like-adaptor (SLA), mRNA.	SLA1; SLAP
ILMN_1744914	NM_032020.3	FUCA2	2519	FUCA2	-2.28005	0.363891	0.177873	0.164228	1.6942e-09	7.79432e-08	-1.36233	0.359974	0.311053	0.2967	0.000194583	0.00835843	fucosidase, alpha-L- 2, plasma (FUCA2), mRNA.	MGC1314; RP1-20N2.5; dJ20N2.5
ILMN_1658071	NM_001677.3	ATP1B1	481	ATP1B1	-0.942811	0.150483	0.177854	0.164209	1.69899e-09	7.80874e-08	-0.571506	0.148138	0.31257	0.298248	0.000146982	0.00694442	ATPase, Na+/K+ transporting, beta 1 polypeptide (ATP1B1), transcript variant 1, mRNA.	MGC1798; ATP1B
ILMN_1760676	NM_206839.1	MORF4L1	10933	MORF4L1	-2.17787	0.347666	0.177819	0.164172	1.70807e-09	7.84288e-08	-1.18033	0.355451	0.302008	0.287466	0.00103795	0.0274239	mortality factor 4 like 1 (MORF4L1), transcript variant 2, mRNA.	Eaf3; S863-6; MORFRG15; FWP006; MGC10631; MRG15; HsT17725
ILMN_1803977	NM_020474.2	GALNT1	2589	GALNT1	-2.16729	0.346066	0.177759	0.164112	1.72335e-09	7.90533e-08	-1.36451	0.336334	0.316793	0.302559	6.72598e-05	0.0039674	UDP-N-acetyl-alpha-D-galactosamine:polypeptide N-acetylgalactosaminyltransferase 1 (GalNAc-T1) (GALNT1), mRNA.	GALNAC-T1
ILMN_3191393	XM_001716912.1	LOC100128892	100128892	CCDC80	-0.922594	0.147399	0.177631	0.163982	1.75683e-09	8.04331e-08	-0.632046	0.139342	0.327583	0.313575	9.06298e-06	0.000930189	PREDICTED: hypothetical protein LOC100128892 (LOC100128892), mRNA.
ILMN_1729216	NM_001885.1	CRYAB	1410	CRYAB	-0.59719	0.0954428	0.177553	0.163903	1.7774e-09	8.12963e-08	-0.361218	0.0939866	0.312265	0.297938	0.000155488	0.00718132	crystallin, alpha B (CRYAB), mRNA.	CTPP2; HSPB5; CRYA2
ILMN_1753312	NM_032812.7	PLXDC2	84898	PLXDC2	-2.19163	0.350283	0.177543	0.163892	1.78026e-09	8.13486e-08	-1.24393	0.352411	0.305968	0.291509	0.000498426	0.0165654	plexin domain containing 2 (PLXDC2), mRNA.	FLJ14623; TEM7R
ILMN_1808325	XM_001134247.1	TM4SF19	116211	TM4SF19-TCTEX1D2,TM4SF19	-0.809151	0.129928	0.176476	0.162807	2.08918e-09	9.42801e-08	-0.503934	0.126541	0.315191	0.300924	9.04809e-05	0.00490172	PREDICTED: transmembrane 4 L six family member 19, transcript variant 2 (TM4SF19), mRNA.
ILMN_1795826	NM_004691.4	ATP6V0D1	9114	ATP6V0D1	-2.25052	0.361643	0.176306	0.162635	2.14299e-09	9.65572e-08	-1.48156	0.34586	0.321793	0.307663	2.66116e-05	0.00202342	ATPase, H+ transporting, lysosomal 38kDa, V0 subunit d1 (ATP6V0D1), mRNA.	VPATPD; ATP6DV; VMA6; P39; ATP6D; VATX
ILMN_2411282	NM_001004128.2	QSOX1	5768	QSOX1	-1.83795	0.295348	0.176304	0.162633	2.14372e-09	9.65572e-08	-0.953948	0.305461	0.298448	0.283832	0.00201018	0.042882	quiescin Q6 sulfhydryl oxidase 1 (QSOX1), transcript variant 2, mRNA.	QSCN6; FLJ34858; Q6; QSOX1
ILMN_1701947	NM_005300.3	GPR34	2857	GPR34	-1.5166	0.243969	0.176061	0.162386	2.22321e-09	9.9663e-08	-1.10905	0.225789	0.336626	0.322806	1.66939e-06	0.00027414	G protein-coupled receptor 34 (GPR34), transcript variant 1, mRNA.
ILMN_1760027	NM_000377.1	WAS	7454	WAS	-0.75911	0.122334	0.175653	0.16197	2.36348e-09	1.05451e-07	-0.432517	0.122555	0.305956	0.291497	0.000499527	0.0165787	Wiskott-Aldrich syndrome (eczema-thrombocytopenia) (WAS), mRNA.	WASP; IMD2; THC
ILMN_1758418	NM_006573.3	TNFSF13B	10673	TNFSF13B	-1.42518	0.229834	0.175495	0.16181	2.41986e-09	1.07561e-07	-0.884247	0.22386	0.314503	0.300222	0.000102776	0.00540079	tumor necrosis factor (ligand) superfamily, member 13b (TNFSF13B), transcript variant 1, mRNA.	ZTNF4; TALL-1; THANK; TNFSF20; CD257; TALL1; delta BAFF; BLYS; BAFF
ILMN_1654586	NM_007368.2	RASA3	22821	RASA3	-2.01447	0.324921	0.175458	0.161772	2.43348e-09	1.07964e-07	-1.16275	0.324027	0.307114	0.292679	0.000403181	0.0143161	RAS p21 protein activator 3 (RASA3), mRNA.	GAPIII; GAP1IP4BP; MGC47588; MGC46517
ILMN_2232121	NM_003608.2	GPR65	8477	GPR65	-2.01335	0.324894	0.17535	0.161663	2.47287e-09	1.09608e-07	-1.11262	0.328604	0.303222	0.288706	0.0008288	0.0233734	G protein-coupled receptor 65 (GPR65), mRNA.	TDAG8; hTDAG8
ILMN_1804007	NM_001098622.1	NANOS3	342977	NANOS3	-3.36735	0.544162	0.175028	0.161336	2.59507e-09	1.14917e-07	-2.23706	0.518299	0.322525	0.308411	2.32278e-05	0.0018309	nanos homolog 3 (Drosophila) (NANOS3), mRNA.	MGC120114; NOS3; NANOS1L
ILMN_1711314	NM_014142.2	NUDT5	11164	NUDT5	-2.22191	0.359314	0.174868	0.161173	2.65794e-09	1.17481e-07	-1.39925	0.348046	0.316002	0.301752	7.7866e-05	0.00441438	nudix (nucleoside diphosphate linked moiety X)-type motif 5 (NUDT5), mRNA.	hYSAH1; YSA1H
ILMN_1798256	NM_003364.2	UPP1	7378	UPP1	-1.65538	0.267694	0.174872	0.161177	2.65655e-09	1.17481e-07	-0.915213	0.270493	0.303177	0.28866	0.000835688	0.0235506	uridine phosphorylase 1 (UPP1), transcript variant 1, mRNA.	UP; UPASE; UDRPASE; UPP
ILMN_1726711	NM_006211.2	PENK	5179	PENK	-2.30967	0.37358	0.174824	0.161128	2.67572e-09	1.18156e-07	-1.42987	0.36384	0.314078	0.299788	0.000111175	0.00570894	proenkephalin (PENK), mRNA.
ILMN_2241953	NM_013439.2	PILRA	29992	PILRA	-2.68599	0.434852	0.174613	0.160914	2.76131e-09	1.21822e-07	-1.63773	0.425488	0.312385	0.29806	0.00015209	0.00707272	paired immunoglobin-like type 2 receptor alpha (PILRA), transcript variant 1, mRNA.	FDF03
ILMN_1665943	NM_001042600.1	MAP4K1	11184	MAP4K1	-1.93294	0.312999	0.174568	0.160868	2.77986e-09	1.22526e-07	-1.11239	0.312027	0.306655	0.292211	0.000438929	0.015279	mitogen-activated protein kinase kinase kinase kinase 1 (MAP4K1), transcript variant 1, mRNA.	HPK1
ILMN_1733515	NM_032603.2	LOXL3	84695	LOXL3	-3.35533	0.54372	0.174404	0.160701	2.84902e-09	1.25458e-07	-1.98874	0.536752	0.309438	0.295052	0.000262298	0.0104685	lysyl oxidase-like 3 (LOXL3), mRNA.	LOXL
ILMN_1746148	NM_198565.1	LRRC33	375387	LRRC33	-1.71076	0.277253	0.17438	0.160677	2.85941e-09	1.25798e-07	-1.04415	0.271117	0.312431	0.298107	0.000150797	0.00704011	leucine rich repeat containing 33 (LRRC33), mRNA.	MGC50789; GARPL1; UNQ3030
ILMN_1738675	NM_080548.3	PTPN6	5777	PTPN6	-1.11943	0.181448	0.174346	0.160642	2.87412e-09	1.2621e-07	-0.646928	0.180579	0.306998	0.292561	0.000411953	0.0145051	protein tyrosine phosphatase, non-receptor type 6 (PTPN6), transcript variant 2, mRNA.	SH-PTP1; PTP-1C; HCPH; SHP1; SHP-1; SHP-1L; HCP; HPTP1C
ILMN_1782618	NM_024112.3	C9orf16	79095	C9orf16	-2.77514	0.450142	0.174184	0.160478	2.9444e-09	1.28938e-07	-1.75714	0.434945	0.316424	0.302183	7.2009e-05	0.00415824	chromosome 9 open reading frame 16 (C9orf16), mRNA.	EST00098; FLJ12823; MGC4639
ILMN_1689585	NM_001009984.1	C20orf194	25943	C20orf194	-2.5667	0.416578	0.174051	0.160342	3.00349e-09	1.31403e-07	-1.51991	0.411164	0.309267	0.294876	0.000270768	0.0106714	chromosome 20 open reading frame 194 (C20orf194), mRNA.	MGC141683; MGC117480; DKFZp434N061
ILMN_1752592	NM_021983.4	HLA-DRB4	3126		-0.610854	0.0991675	0.173994	0.160284	3.02936e-09	1.32413e-07	-0.458237	0.0909987	0.339703	0.325947	9.35855e-07	0.000184418	major histocompatibility complex, class II, DR beta 4 (HLA-DRB4), mRNA.	HLA DRB1; DRB4; HLA-DRB1; HLA-DR4B
ILMN_2105573	NM_001001437.3	CCL3L3	414062	CCL3L3,CCL3L1	-1.02263	0.166094	0.173888	0.160176	3.07778e-09	1.34405e-07	-0.636331	0.161323	0.314385	0.300102	0.000105038	0.00546563	chemokine (C-C motif) ligand 3-like 3 (CCL3L3), mRNA.	SCYA3L1; LD78BETA; 464.2; SCYA3L; D17S1718; LD78; MGC12815
ILMN_1703370	NM_032799.4	ZDHHC12	84885	ZDHHC12	-3.22254	0.523601	0.173802	0.160089	3.1174e-09	1.3591e-07	-2.25043	0.490626	0.32878	0.314796	7.2505e-06	0.000788287	zinc finger, DHHC-type containing 12 (ZDHHC12), mRNA.	MGC13153; MGC54050; ZNF400; FLJ14524
ILMN_1813561	NM_033128.1	SCIN	85477	SCIN	-0.928093	0.150987	0.173521	0.159803	3.25146e-09	1.41467e-07	-0.495401	0.153937	0.30014	0.285559	0.00146787	0.0349027	scinderin (SCIN), mRNA.	KIAA1905
ILMN_1669674	NM_006586.3	CNPY3	10695	CNPY3	-2.47617	0.402939	0.173463	0.159745	3.27935e-09	1.42549e-07	-1.36204	0.406862	0.302508	0.287977	0.00094596	0.0256233	canopy 3 homolog (zebrafish) (CNPY3), mRNA.	PRAT4A; TNRC5; CAG4A; ERDA5
ILMN_2374249	NM_003583.2	DYRK2	8445	DYRK2	-3.0516	0.496791	0.173367	0.159647	3.32707e-09	1.44358e-07	-2.14042	0.46475	0.329221	0.315246	6.67768e-06	0.000744844	dual-specificity tyrosine-(Y)-phosphorylation regulated kinase 2 (DYRK2), transcript variant 1, mRNA.
ILMN_2300186	NM_001037494.1	DYNLL1	8655	DYNLL1	-1.42034	0.231392	0.173207	0.159485	3.40721e-09	1.47244e-07	-0.947291	0.21977	0.322394	0.308278	2.37985e-05	0.00186545	dynein, light chain, LC8-type 1 (DYNLL1), transcript variant 1, mRNA.	PIN; DLC1; MGC126137; DLC8; DNCL1; MGC126138; LC8a; hdlc1; LC8; DNCLC1
ILMN_1774602	NM_001998.2	FBLN2	2199	FBLN2	-1.23352	0.200959	0.173204	0.159481	3.40914e-09	1.47244e-07	-0.686505	0.202073	0.303436	0.288925	0.00079649	0.0228089	fibulin 2 (FBLN2), transcript variant 2, mRNA.
ILMN_1703327	NM_003978.2	PSTPIP1	9051	PSTPIP1	-3.3754	0.550116	0.173118	0.159394	3.45279e-09	1.48993e-07	-1.93355	0.548036	0.305936	0.291477	0.00050137	0.0166212	proline-serine-threonine phosphatase interacting protein 1 (PSTPIP1), mRNA.	PSTPIP; CD2BP1L; PAPAS; CD2BP1S; CD2BP1; H-PIP
ILMN_1651826	NM_006317.3	BASP1	10409	BASP1	-0.720487	0.117464	0.173042	0.159316	3.49262e-09	1.50574e-07	-0.379841	0.120125	0.299137	0.284536	0.00176843	0.0392843	brain abundant, membrane attached signal protein 1 (BASP1), mRNA.	CAP-23; NAP22; CAP23; MGC8555; NAP-22
ILMN_1701911	NM_130848.2	C5orf20	140947	C5orf20	-5.26056	0.858641	0.172784	0.159054	3.62971e-09	1.562e-07	-3.32678	0.828715	0.315875	0.301623	7.97168e-05	0.00447227	chromosome 5 open reading frame 20 (C5orf20), mRNA.	DCNP1
ILMN_1707336	NM_001024959.1	ARPC4	10093	ARPC4	-2.20938	0.360883	0.172621	0.158889	3.71883e-09	1.59599e-07	-1.4441	0.344704	0.319689	0.305516	3.9319e-05	0.00273246	actin related protein 2/3 complex, subunit 4, 20kDa (ARPC4), transcript variant 2, mRNA.	ARC20; p20-Arc; MGC13544
ILMN_2179083	NM_032211.6	LOXL4	84171	LOXL4	-1.27443	0.208207	0.172579	0.158846	3.7424e-09	1.60465e-07	-0.706053	0.209451	0.302942	0.28842	0.000872817	0.024239	lysyl oxidase-like 4 (LOXL4), mRNA.	FLJ21889; LOXC
ILMN_1810334	NM_001099339.1	COMMD7	149951	COMMD7	-2.6563	0.434116	0.172502	0.158768	3.78571e-09	1.62175e-07	-1.9382	0.401225	0.334634	0.320772	2.42629e-06	0.00035526	COMM domain containing 7 (COMMD7), transcript variant 2, mRNA.	FLJ14987; C20orf92; MGC33315; dJ1085F17.3
ILMN_1796339	NM_021623.1	PLEKHA2	59339	PLEKHA2	-2.38382	0.389612	0.172486	0.158752	3.79453e-09	1.62406e-07	-1.36314	0.387988	0.30565	0.291184	0.000528664	0.0171839	pleckstrin homology domain containing, family A (phosphoinositide binding specific) member 2 (PLEKHA2), mRNA.	TAPP2; FLJ25921
ILMN_1698243	NM_144580.1	C1orf85	112770	C1orf85	-1.82429	0.298254	0.172418	0.158683	3.8333e-09	1.63917e-07	-1.16585	0.286811	0.316963	0.302733	6.5169e-05	0.00389043	chromosome 1 open reading frame 85 (C1orf85), mRNA.	NCU-G1; MGC31963; RP11-443G18.2
ILMN_1807042	NM_002356.5	MARCKS	4082	MARCKS	-1.5084	0.246641	0.172389	0.158653	3.84999e-09	1.64333e-07	-0.80052	0.251404	0.299531	0.284938	0.00164364	0.0376922	myristoylated alanine-rich protein kinase C substrate (MARCKS), mRNA.	MACS; 80K-L; PRKCSL; FLJ14368; MRACKS; PKCSL; FLJ90045
ILMN_1769013	NM_001671.2	ASGR1	432	ASGR1	-2.09733	0.342974	0.172366	0.15863	3.86323e-09	1.6475e-07	-1.22548	0.339169	0.307602	0.293177	0.000368407	0.0134026	asialoglycoprotein receptor 1 (ASGR1), mRNA.	ASGPR; Hs.12056; CLEC4H1
ILMN_2371169	NM_003461.4	ZYX	7791	ZYX	-1.48202	0.242398	0.172325	0.158587	3.88726e-09	1.65625e-07	-0.898577	0.236926	0.31122	0.29687	0.000188674	0.0081639	zyxin (ZYX), transcript variant 1, mRNA.	ESP-2; HED-2
ILMN_3248591	NM_000428.2	LTBP2	4053	LTBP2	-1.18241	0.193526	0.172173	0.158433	3.97622e-09	1.68807e-07	-0.651723	0.194867	0.302448	0.287916	0.000956534	0.0257915	latent transforming growth factor beta binding protein 2 (LTBP2), mRNA.	LTBP3; MSTP031; C14orf141
ILMN_1765644	NM_017845.3	COMMD8	54951	COMMD8	-2.3507	0.384958	0.172049	0.158307	4.05082e-09	1.7182e-07	-1.41226	0.377219	0.310223	0.295852	0.000226876	0.00939569	COMM domain containing 8 (COMMD8), mRNA.	FLJ20502
ILMN_1704797	NM_182906.2	CLEC10A	10462	CLEC10A	-4.50137	0.73733	0.171997	0.158254	4.08227e-09	1.72999e-07	-3.49707	0.669461	0.34447	0.330813	3.8045e-07	0.000101084	C-type lectin domain family 10, member A (CLEC10A), transcript variant 1, mRNA.	HML; CD301; CLECSF13; HML2; CLECSF14
ILMN_1814726	NM_005506.2	SCARB2	950	SCARB2	-2.40957	0.394845	0.17191	0.158166	4.13528e-09	1.74932e-07	-1.41326	0.389755	0.307857	0.293437	0.000351458	0.0128852	scavenger receptor class B, member 2 (SCARB2), mRNA.	CD36L2; HLGP85; SR-BII; LIMPII
ILMN_3245413	NM_015213.2	DENND5A	23258	DENND5A	-2.32634	0.381205	0.171911	0.158167	4.13467e-09	1.74932e-07	-1.42976	0.37084	0.312518	0.298196	0.000148381	0.00697566	DENN/MADD domain containing 5A (DENND5A), mRNA.	FLJ33829; FLJ22354; FLJ43455; KIAA1091
ILMN_2212909	NM_014791.2	MELK	9833	MELK	-2.85197	0.467807	0.171688	0.15794	4.27448e-09	1.80015e-07	-1.77344	0.453323	0.313702	0.299404	0.000119188	0.00599166	maternal embryonic leucine zipper kinase (MELK), mRNA.	KIAA0175; HPK38
ILMN_1657892	NM_138636.2	TLR8	51311	TLR8	-1.49698	0.245557	0.171681	0.157933	4.27924e-09	1.80055e-07	-0.910755	0.239567	0.311405	0.297059	0.00018231	0.00802412	toll-like receptor 8 (TLR8), transcript variant 2, mRNA.	MGC119600; MGC119599
ILMN_1808114	NM_006691.3	LYVE1	10894	LYVE1	-0.727874	0.119416	0.171645	0.157897	4.30213e-09	1.80697e-07	-0.455815	0.115461	0.314456	0.300174	0.000103676	0.00543597	lymphatic vessel endothelial hyaluronan receptor 1 (LYVE1), mRNA.	CRSBP-1; XLKD1; LYVE-1; HAR
ILMN_1796216	NM_014909.3	VASH1	22846	VASH1	-1.90261	0.312219	0.171592	0.157843	4.33619e-09	1.81966e-07	-1.16039	0.304338	0.311635	0.297294	0.00017471	0.00777335	vasohibin 1 (VASH1), mRNA.	KIAA1036
ILMN_1702837	NM_002807.2	PSMD1	5707	PSMD1	-1.60898	0.264178	0.171473	0.157721	4.41433e-09	1.85081e-07	-0.960005	0.259231	0.309401	0.295014	0.000264117	0.0105034	proteasome (prosome, macropain) 26S subunit, non-ATPase, 1 (PSMD1), mRNA.	S1; MGC133041; P112; MGC133040
ILMN_1804476	NM_205847.1	GMPPA	29926	GMPPA	-2.84088	0.466834	0.171287	0.157532	4.53834e-09	1.89608e-07	-1.65644	0.461265	0.307166	0.292732	0.00039933	0.0142321	GDP-mannose pyrophosphorylase A (GMPPA), transcript variant 2, mRNA.
ILMN_1713901	NM_016657.1	KDELR3	11015	KDELR3	-1.39751	0.22973	0.17121	0.157455	4.59032e-09	1.91611e-07	-0.88154	0.221522	0.315129	0.300861	9.15256e-05	0.00494134	KDEL (Lys-Asp-Glu-Leu) endoplasmic reticulum protein retention receptor 3 (KDELR3), transcript variant 2, mRNA.	ERD2L3
ILMN_2412214	NM_009587.2	LGALS9	3965	LGALS9	-1.56187	0.256917	0.171065	0.157307	4.69104e-09	1.95126e-07	-0.91025	0.25381	0.307073	0.292637	0.000406285	0.0143824	lectin, galactoside-binding, soluble, 9 (LGALS9), transcript variant 1, mRNA.	MGC125973; MGC117375; ECALECTIN; HUAT; galectin-9; MGC125974
ILMN_2354953	NM_000903.2	NQO1	1728	NQO1	-2.49866	0.412084	0.170491	0.156724	5.10955e-09	2.11418e-07	-1.46392	0.406118	0.307434	0.293005	0.000380052	0.0137103	NAD(P)H dehydrogenase, quinone 1 (NQO1), transcript variant 1, mRNA.	NMOR1; NMORI; DHQU; DIA4; DTD; QR1
ILMN_1676980	NM_014751.4	MTSS1	9788	MTSS1	-2.23119	0.368074	0.170431	0.156662	5.15558e-09	2.1295e-07	-1.34496	0.359564	0.310155	0.295784	0.000229725	0.00947222	metastasis suppressor 1 (MTSS1), mRNA.	MIM; KIAA0429; MIMA; MIMB; FLJ44694; DKFZp781P2223
ILMN_1720858	NM_021243.2	C6orf115	58527	C6orf115	-1.50205	0.247789	0.170432	0.156663	5.15503e-09	2.1295e-07	-0.836971	0.247969	0.303023	0.288503	0.000859824	0.0239836	chromosome 6 open reading frame 115 (C6orf115), mRNA.	HSPC280; PRO2013
ILMN_1696846	XR_001013.1	LOC541471	541471	LOC541471	-2.46877	0.407345	0.170389	0.15662	5.18783e-09	2.14055e-07	-1.38331	0.406921	0.303477	0.288966	0.000790551	0.0227285	PREDICTED: hypothetical LOC541471 (LOC541471), misc RNA.
ILMN_1710544	NM_002589.2	PCDH7	5099	PCDH7	-1.91755	0.3165	0.170315	0.156544	5.24556e-09	2.15725e-07	-1.38684	0.292894	0.332311	0.318401	3.74836e-06	0.000480419	protocadherin 7 (PCDH7), transcript variant a, mRNA.	BHPCDH; BH-Pcdh
ILMN_2367070	NM_001037171.1	ACOT9	23597	ACOT9	-2.97884	0.491721	0.170294	0.156523	5.26238e-09	2.16041e-07	-1.68883	0.489374	0.304453	0.289962	0.000659804	0.0200331	acyl-CoA thioesterase 9 (ACOT9), transcript variant 1, mRNA.	MT-ACT48; CGI-16; ACATE2
ILMN_1742521	NM_002086.3	GRB2	2885	GRB2	-2.78048	0.458973	0.170296	0.156525	5.26087e-09	2.16041e-07	-1.94539	0.428773	0.327611	0.313603	9.01667e-06	0.000930189	growth factor receptor-bound protein 2 (GRB2), transcript variant 1, mRNA.	MST084; ASH; MSTP084; EGFRBP-GRB2; Grb3-3
ILMN_1705047	NM_016610.2	TLR8	51311	TLR8	-2.3217	0.383488	0.170154	0.156381	5.37266e-09	2.20377e-07	-1.43435	0.371702	0.312589	0.298268	0.000146445	0.0069329	toll-like receptor 8 (TLR8), transcript variant 1, mRNA.	MGC119600; MGC119599
ILMN_1769091	NM_199418.2	PRCP	5547	PRCP	-2.08904	0.345345	0.169973	0.156196	5.51992e-09	2.2544e-07	-1.27303	0.336057	0.311127	0.296775	0.000191937	0.00828237	prolylcarboxypeptidase (angiotensinase C) (PRCP), transcript variant 2, mRNA.	HUMPCP; PCP; MGC2202
ILMN_3242459	NM_024096.1	DCTPP1	79077	DCTPP1	-2.18186	0.360719	0.169955	0.156179	5.53424e-09	2.25452e-07	-1.38706	0.346551	0.31562	0.301362	8.35752e-05	0.00462293	dCTP pyrophosphatase 1 (DCTPP1), mRNA.	RS21C6; CDA03; MGC5627
ILMN_1772261	NM_012201.4	GLG1	2734	GLG1	-2.10522	0.348048	0.169955	0.156178	5.53452e-09	2.25452e-07	-1.19686	0.345918	0.304624	0.290137	0.000639236	0.0196381	golgi apparatus protein 1 (GLG1), mRNA.	CFR-1; FLJ23319; MG160; FLJ23967; MG-160; ESL-1
ILMN_1701875	NM_003461.4	ZYX	7791	ZYX	-1.19549	0.197639	0.169963	0.156187	5.52797e-09	2.25452e-07	-0.651514	0.198978	0.301156	0.286597	0.00121542	0.0305918	zyxin (ZYX), transcript variant 1, mRNA.	ESP-2; HED-2
ILMN_2364022	NM_004207.2	SLC16A3	9123	SLC16A3	-1.0301	0.17033	0.169921	0.156143	5.56303e-09	2.26224e-07	-0.625746	0.165898	0.310794	0.296436	0.000204127	0.00866333	solute carrier family 16, member 3 (monocarboxylic acid transporter 4) (SLC16A3), transcript variant 2, mRNA.	MCT3; MGC138472; MGC138474; MCT4
ILMN_1788955	NM_020992.2	PDLIM1	9124	PDLIM1	-1.70748	0.282386	0.169881	0.156103	5.59585e-09	2.27168e-07	-0.869268	0.290148	0.296257	0.281596	0.00302279	0.0568428	PDZ and LIM domain 1 (PDLIM1), mRNA.	CLP36; CLP-36; hCLIM1; CLIM1; ELFIN
ILMN_2207363	NM_006423.1	RABAC1	10567	RABAC1	-2.70301	0.447391	0.169705	0.155924	5.74484e-09	2.32418e-07	-1.61728	0.437639	0.309244	0.294853	0.000271918	0.0107078	Rab acceptor 1 (prenylated) (RABAC1), mRNA.	PRAF1; PRA1; YIP3
ILMN_1778236	NM_002834.3	PTPN11	5781	PTPN11	-1.3214	0.218767	0.16965	0.155868	5.79208e-09	2.3353e-07	-0.779416	0.214913	0.307869	0.29345	0.000350651	0.0128655	protein tyrosine phosphatase, non-receptor type 11 (PTPN11), mRNA.	SH-PTP2; PTP2C; BPTP3; SHP2; SH-PTP3; MGC14433; PTP-1D; CFC; NS1
ILMN_1714567	NM_001620.1	AHNAK	79026	AHNAK	-1.5168	0.251309	0.169484	0.155699	5.93687e-09	2.3896e-07	-0.746676	0.260585	0.294088	0.279381	0.0045345	0.0738734	AHNAK nucleoprotein (AHNAK), transcript variant 1, mRNA.	MGC5395; AHNAKRS
ILMN_1789596	NM_001987.4	ETV6	2120	ETV6	-2.32974	0.386069	0.169444	0.155659	5.97168e-09	2.40157e-07	-1.23393	0.391697	0.298927	0.284322	0.00183868	0.0401736	ets variant 6 (ETV6), mRNA.	TEL; TEL/ABL
ILMN_1743275	NM_001099289.1	SH3RF3	344558	SH3RF3	-3.31414	0.549477	0.169333	0.155546	6.07147e-09	2.43549e-07	-2.0836	0.529308	0.314216	0.299929	0.000108373	0.00560151	SH3 domain containing ring finger 3 (SH3RF3), mRNA.	FLJ00204; POSH2
ILMN_1749868	NM_001010924.1	FAM171A1	221061	FAM171A1	-1.45939	0.242027	0.169276	0.155488	6.12356e-09	2.45222e-07	-0.652159	0.257862	0.28889	0.274076	0.0120772	0.138235	family with sequence similarity 171, member A1 (FAM171A1), mRNA.	MGC130015; FLJ12884; MGC130014
ILMN_1730039	NM_032880.2	IGSF21	84966	IGSF21	-3.80002	0.630223	0.169268	0.15548	6.13034e-09	2.45286e-07	-2.35335	0.609792	0.312597	0.298277	0.000146224	0.00692936	immunoglobin superfamily, member 21 (IGSF21), mRNA.	FLJ41177; RP11-121A23.1; MGC15730
ILMN_2411781	NM_001042723.1	RYR1	6261	RYR1	-4.10115	0.680188	0.169261	0.155472	6.13741e-09	2.45361e-07	-2.53373	0.658606	0.312345	0.298018	0.000153229	0.00711168	ryanodine receptor 1 (skeletal) (RYR1), transcript variant 2, mRNA.	CCO; SKRR; RYR; MHS1; MHS; RYDR
ILMN_1769876	NM_018421.2	TBC1D2	55357	TBC1D2	-2.55479	0.423936	0.16915	0.15536	6.23938e-09	2.49227e-07	-1.51496	0.415524	0.308251	0.29384	0.000326715	0.0121784	TBC1 domain family, member 2 (TBC1D2), mRNA.	FLJ10702; DKFZp761D1823; PARIS1; FLJ16244; FLJ42782; PARIS-1; TBC1D2A
ILMN_1687757	NM_001818.2	AKR1C4	1109		-0.89649	0.148793	0.169104	0.155313	6.28224e-09	2.50516e-07	-0.556132	0.14387	0.312728	0.298409	0.000142744	0.00683095	aldo-keto reductase family 1, member C4 (chlordecone reductase; 3-alpha hydroxysteroid dehydrogenase, type I; dihydrodiol dehydrogenase 4) (AKR1C4), mRNA.	CDR; CHDR; C11; 3-alpha-HSD; MGC22581; HAKRA; DD4
ILMN_1692707	NM_001013663.1	C2orf79	391356	PTRHD1	-4.16488	0.691569	0.169005	0.155213	6.37499e-09	2.54001e-07	-2.82526	0.651238	0.323027	0.308923	2.11617e-05	0.00170498	chromosome 2 open reading frame 79 (C2orf79), mRNA.
ILMN_1672124	NM_016613.4	C4orf18	51313	FAM198B	-1.11105	0.184609	0.168862	0.155067	6.51224e-09	2.59033e-07	-0.553179	0.190548	0.294706	0.280012	0.00403909	0.0690119	chromosome 4 open reading frame 18 (C4orf18), transcript variant 2, mRNA.	AD021; DKFZp434L142; AD036; FLJ38155
ILMN_1709820	NM_001637.1	AOAH	313	AOAH	-2.71985	0.451952	0.168848	0.155053	6.5257e-09	2.5935e-07	-1.51952	0.45081	0.302936	0.288414	0.0008738	0.0242422	acyloxyacyl hydrolase (neutrophil) (AOAH), mRNA.
ILMN_1738578	NM_014890.2	FILIP1L	11259	FILIP1L	-1.25652	0.208809	0.168832	0.155037	6.54117e-09	2.59528e-07	-0.696171	0.208797	0.302258	0.287722	0.000990852	0.0265503	filamin A interacting protein 1-like (FILIP1L), transcript variant 2, mRNA.	DOC-1; GIP90; DOC1
ILMN_2393254	NM_001749.2	CAPNS1	826	CAPNS1	-1.87142	0.311001	0.168826	0.155031	6.54697e-09	2.59541e-07	-1.14311	0.302008	0.311063	0.296711	0.000194205	0.00835575	calpain, small subunit 1 (CAPNS1), transcript variant 1, mRNA.	CANP; CALPAIN4; CDPS; 30K; CANPS; CAPN4
ILMN_1682727	NM_175061.3	JAZF1	221895	JAZF1	-2.20558	0.366818	0.168658	0.15486	6.71293e-09	2.65897e-07	-1.34667	0.356185	0.310977	0.296623	0.00019733	0.00845339	JAZF zinc finger 1 (JAZF1), mRNA.	ZNF802; TIP27; DKFZp761K2222
ILMN_1721563	NM_017849.1	TMEM127	55654	TMEM127	-4.6906	0.780846	0.168454	0.154652	6.92e-09	2.73566e-07	-2.89732	0.755422	0.312101	0.29777	0.00016029	0.00733859	transmembrane protein 127 (TMEM127), mRNA.	FLJ20507; FLJ22257
ILMN_1693552	NM_007261.2	CD300A	11314	CD300A	-1.40313	0.23361	0.168426	0.154624	6.94901e-09	2.74129e-07	-0.838077	0.228267	0.308762	0.294361	0.000297246	0.0113935	CD300a molecule (CD300A), mRNA.	CMRF35H; IRp60; IRC1; CMRF-35-H9; CMRF-35H; IGSF12; CMRF35H9; IRC2
ILMN_2216852	NM_000291.2	PGK1	5230	PGK1	-1.93644	0.322489	0.168368	0.154565	7.00889e-09	2.76232e-07	-1.18222	0.313042	0.31089	0.296533	0.000200541	0.0085522	phosphoglycerate kinase 1 (PGK1), mRNA.	MGC117307; MIG10; MGC8947; PGKA; MGC142128
ILMN_2157951	NM_005819.4	STX6	10228	STX6	-2.48229	0.413759	0.168176	0.15437	7.21158e-09	2.83512e-07	-1.4123	0.410059	0.304322	0.289829	0.000675948	0.0203231	syntaxin 6 (STX6), mRNA.
ILMN_2380771	NM_153326.1	AKR1A1	10327	AKR1A1	-2.38219	0.397276	0.168066	0.154258	7.3309e-09	2.87247e-07	-1.58536	0.375889	0.320315	0.306155	3.50086e-05	0.00250863	aldo-keto reductase family 1, member A1 (aldehyde reductase) (AKR1A1), transcript variant 2, mRNA.	ALR; ALDR1; MGC1380; MGC12529; DD3
ILMN_1811592	NM_020824.2	ARHGAP21	57584	ARHGAP21	-1.58471	0.264337	0.16802	0.154211	7.38068e-09	2.88958e-07	-0.729425	0.278499	0.290226	0.275439	0.00937704	0.118417	Rho GTPase activating protein 21 (ARHGAP21), mRNA.	FLJ33323; DKFZp761L0424; ARHGAP10
ILMN_3247821	NM_018252.2	TMEM206	55248	TMEM206	-2.69031	0.449051	0.167879	0.154068	7.5375e-09	2.94367e-07	-1.43097	0.453781	0.298984	0.28438	0.00181926	0.0398873	transmembrane protein 206 (TMEM206), mRNA.	C1orf75; RP11-384C4.5; FLJ10874
ILMN_1721605	NM_020197.1	SMYD2	56950	SMYD2	-1.9427	0.324376	0.167804	0.153992	7.62124e-09	2.97392e-07	-1.19663	0.313842	0.311635	0.297295	0.000174707	0.00777335	SET and MYND domain containing 2 (SMYD2), mRNA.	HSKM-B; MGC119305; ZMYND14; KMT3C
ILMN_1807074	NM_002415.1	MIF	4282	MIF	-1.37323	0.229498	0.167609	0.153793	7.84626e-09	3.05417e-07	-0.772699	0.228002	0.30328	0.288765	0.000819857	0.0232651	macrophage migration inhibitory factor (glycosylation-inhibiting factor) (MIF), mRNA.	GLIF; MMIF; GIF
ILMN_1763587	NM_022144.1	TNMD	64102	TNMD	-0.451265	0.0754368	0.167552	0.153735	7.91292e-09	3.07514e-07	-0.261237	0.074313	0.305689	0.291224	0.000524879	0.0170857	tenomodulin (TNMD), mRNA.	tendin; CHM1L; BRICD4; myodulin; TEM; CHM1-LIKE
ILMN_1689734	NM_173842.1	IL1RN	3557	IL1RN	-0.903253	0.151016	0.167521	0.153703	7.94971e-09	3.08681e-07	-0.547459	0.146759	0.309948	0.295572	0.000238719	0.00972435	interleukin 1 receptor antagonist (IL1RN), transcript variant 1, mRNA.	ICIL-1RA; IRAP; IL-1ra3; MGC10430; IL1F3; IL1RA
ILMN_1750409	NM_004251.3	RAB9A	9367	RAB9A	-1.66819	0.279034	0.167423	0.153604	8.06549e-09	3.1292e-07	-0.908684	0.279797	0.300672	0.286102	0.00132981	0.0326577	RAB9A, member RAS oncogene family (RAB9A), mRNA.	RAB9
ILMN_1693242	NM_145288.1	ZNF296	162979	ZNF296	-4.52134	0.756386	0.167391	0.153571	8.10458e-09	3.13922e-07	-2.9665	0.718178	0.318394	0.304194	4.99901e-05	0.00326101	zinc finger protein 296 (ZNF296), mRNA.	ZNF296
ILMN_1710756	NM_001428.2	ENO1	2023	ENO1	-1.45347	0.243149	0.167396	0.153577	8.09832e-09	3.13922e-07	-0.888297	0.235684	0.310736	0.296376	0.000206348	0.008729	enolase 1, (alpha) (ENO1), mRNA.	MPB1; ENO1L1; MBP-1; PPH; NNE
ILMN_2157075	NM_002319.3	LRCH4	4034	LRCH4	-2.15435	0.360421	0.167382	0.153562	8.11542e-09	3.14084e-07	-1.20079	0.35895	0.302464	0.287932	0.00095379	0.0257616	leucine-rich repeats and calponin homology (CH) domain containing 4 (LRCH4), mRNA.	LRRN1; PP14183; FLJ40101; SAP25; FLJ46315; LRRN4; LRN
ILMN_1805842	NM_001449.3	FHL1	2273	FHL1	-0.864753	0.144711	0.167325	0.153504	8.18427e-09	3.16231e-07	-0.542611	0.13918	0.31342	0.299116	0.000125589	0.00625954	four and a half LIM domains 1 (FHL1), mRNA.	KYO-T; SLIM1; MGC111107; XMPMA; FHL1B; bA535K18.1
ILMN_2349129	NM_005700.3	DPP3	10072	DPP3	-2.69544	0.451264	0.16723	0.153408	8.30066e-09	3.20466e-07	-1.58319	0.442453	0.306913	0.292474	0.000418455	0.0146922	dipeptidyl-peptidase 3 (DPP3), transcript variant 1, mRNA.	FLJ11387; DPPIII; FLJ22331
ILMN_1702585	XM_929774.2	LOC646817	646817	SET	-5.07772	0.850367	0.167163	0.15334	8.38357e-09	3.23403e-07	-3.45635	0.798839	0.322764	0.308655	2.22189e-05	0.00177504	PREDICTED: similar to Protein SET (Phosphatase 2A inhibitor I2PP2A) (I-2PP2A) (Template-activating factor I) (TAF-I) (HLA-DR-associated protein II) (PHAPII) (Inhibitor of granzyme A-activated DNase) (IGAAD) (LOC646817), mRNA.
ILMN_1797031	NM_024610.4	HSPBAP1	79663	HSPBAP1	-3.05592	0.512064	0.167042	0.153216	8.53588e-09	3.28743e-07	-1.8797	0.495208	0.311284	0.296936	0.000186439	0.00812647	HSPB (heat shock 27kDa) associated protein 1 (HSPBAP1), mRNA.	FLJ22623; PASS1; FLJ39386
ILMN_1787885	NM_024815.3	NUDT18	79873	NUDT18	-2.21913	0.371898	0.167013	0.153187	8.57248e-09	3.29754e-07	-1.42177	0.355414	0.315574	0.301315	8.42871e-05	0.00464601	nudix (nucleoside diphosphate linked moiety X)-type motif 18 (NUDT18), mRNA.	FLJ22494
ILMN_1659975	NM_152374.1	C1orf216	127703	C1orf216	-3.80161	0.63719	0.166983	0.153157	8.61066e-09	3.30814e-07	-2.31682	0.617839	0.310345	0.295977	0.000221797	0.00922575	chromosome 1 open reading frame 216 (C1orf216), mRNA.	FLJ38984
ILMN_2254635	NM_000887.3	ITGAX	3687	ITGAX	-0.80479	0.135088	0.166671	0.15284	9.01802e-09	3.45343e-07	-0.457878	0.133589	0.304007	0.289507	0.000716635	0.0211696	integrin, alpha X (complement component 3 receptor 4 subunit) (ITGAX), mRNA.	CD11C
ILMN_1665909	NM_006148.1	LASP1	3927	LASP1	-1.76646	0.29667	0.166555	0.152722	9.17563e-09	3.50475e-07	-0.90014	0.302814	0.295863	0.281194	0.00325363	0.0596651	LIM and SH3 protein 1 (LASP1), mRNA.	MLN50; Lasp-1
ILMN_1715680	NM_145043.1	NEIL2	252969	NEIL2	-1.64241	0.275842	0.16655	0.152717	9.18168e-09	3.50475e-07	-1.07545	0.261859	0.317878	0.303667	5.50084e-05	0.0034656	nei like 2 (E. coli) (NEIL2), mRNA.	FLJ31644; MGC4505; MGC2832; NEH2
ILMN_2210753	NM_006691.2	XLKD1	10894	LYVE1	-0.917561	0.154102	0.166554	0.15272	9.17727e-09	3.50475e-07	-0.534527	0.15132	0.30602	0.291562	0.000493724	0.0164902	extracellular link domain containing 1 (XLKD1), mRNA.	CRSBP-1; LYVE-1; HAR
ILMN_1800733	NM_005908.3	MANBA	4126	MANBA	-2.27322	0.382301	0.166262	0.152424	9.58243e-09	3.63299e-07	-1.23442	0.38297	0.300231	0.285652	0.00144319	0.0344662	mannosidase, beta A, lysosomal (MANBA), mRNA.	MANB1
ILMN_1697554	NM_018990.2	SASH3	54440	SASH3	-1.97799	0.332644	0.166267	0.152429	9.57621e-09	3.63299e-07	-1.12377	0.328896	0.303804	0.2893	0.000744053	0.0218295	SAM and SH3 domain containing 3 (SASH3), mRNA.	753P9; CXorf9; SH3D6C; SLY
ILMN_1753819	NM_057178.3	RFFL	117584	RAD51L3-RFFL,RFFL	-2.53462	0.42628	0.166253	0.152415	9.59514e-09	3.63325e-07	-1.53419	0.413797	0.309488	0.295102	0.00025991	0.0103995	ring finger and FYVE-like domain containing 1 (RFFL), transcript variant 1, mRNA.	RNF189; RNF34L
ILMN_1815023	NM_002648.2	PIM1	5292	PIM1	-1.07707	0.181169	0.166225	0.152386	9.63589e-09	3.64576e-07	-0.671935	0.174331	0.312495	0.298172	0.000149019	0.00698486	pim-1 oncogene (PIM1), mRNA.	PIM
ILMN_1765419	NM_001503.2	GPLD1	2822	GPLD1	-2.35438	0.396278	0.166087	0.152246	9.83573e-09	3.71542e-07	-1.38084	0.388122	0.306513	0.292065	0.000450674	0.0155919	glycosylphosphatidylinositol specific phospholipase D1 (GPLD1), transcript variant 1, mRNA.	GPIPLDM; PIGPLD; MGC22590; GPIPLD; PIGPLD1
ILMN_1776888	NM_139282.1	RHOXF1	158800	RHOXF1	-2.31223	0.389271	0.166038	0.152196	9.90697e-09	3.73935e-07	-1.34982	0.381749	0.306087	0.29163	0.00048762	0.0163325	Rhox homeobox family, member 1 (RHOXF1), mRNA.	MGC119030; MGC119033; OTEX; PEPP1
ILMN_1713636	NM_014624.3	S100A6	6277	S100A6	-0.945297	0.159176	0.165995	0.152153	9.96975e-09	3.76004e-07	-0.578707	0.153963	0.310526	0.296162	0.00021451	0.00900979	S100 calcium binding protein A6 (S100A6), mRNA.	PRA; CABP; 2A9; 5B10; CACY
ILMN_1764826	NM_006521.3	TFE3	7030	TFE3	-2.4788	0.417563	0.165911	0.152067	1.00953e-08	3.79528e-07	-1.52887	0.402984	0.311245	0.296896	0.000187788	0.00814792	transcription factor binding to IGHM enhancer 3 (TFE3), mRNA.	RCCP2; TFEA
ILMN_2053103	NM_014585.3	SLC40A1	30061	SLC40A1	-1.14969	0.193729	0.165846	0.152001	1.01932e-08	3.82297e-07	-0.764469	0.182999	0.319425	0.305246	4.12942e-05	0.00282629	solute carrier family 40 (iron-regulated transporter), member 1 (SLC40A1), mRNA.	IREG1; HFE4; MST079; FPN1; MTP1; MSTP079; SLC11A3
ILMN_1687301	NM_004385.2	VCAN	1462	VCAN	-0.767702	0.12937	0.165833	0.151988	1.02127e-08	3.82724e-07	-0.417102	0.129487	0.300194	0.285614	0.00145322	0.0345962	versican (VCAN), mRNA.	DKFZp686K06110; WGN; VERSICAN; PG-M; WGN1; ERVR; CSPG2
ILMN_2409167	NM_001002858.1	ANXA2	302	ANXA2	-1.48334	0.249979	0.165821	0.151976	1.02304e-08	3.83087e-07	-0.915772	0.24116	0.311316	0.296969	0.000185325	0.00810802	annexin A2 (ANXA2), transcript variant 1, mRNA.	P36; LPC2D; ANX2L4; ANX2; PAP-IV; CAL1H; LIP2; LPC2
ILMN_1749362	NM_006139.1	CD28	940	CD28	-4.42065	0.745584	0.165651	0.151803	1.04916e-08	3.92244e-07	-2.58559	0.730401	0.306166	0.291711	0.00048052	0.0161864	CD28 molecule (CD28), mRNA.	Tp44; MGC138290
ILMN_2360784	NM_001042576.1	RRBP1	6238	RRBP1	-1.76082	0.297199	0.165495	0.151644	1.07383e-08	4.00518e-07	-1.05551	0.28904	0.308369	0.29396	0.00031968	0.0119897	ribosome binding protein 1 homolog 180kDa (dog) (RRBP1), transcript variant 1, mRNA.	DKFZp586A1420; MGC157721; ES130; FLJ36146; MGC157720; ES/130; hES
ILMN_1779071	NM_005103.3	FEZ1	9638	FEZ1	-1.51677	0.256087	0.165428	0.151576	1.08453e-08	4.03239e-07	-0.850913	0.253816	0.302598	0.288068	0.000930413	0.0253766	fasciculation and elongation protein zeta 1 (zygin I) (FEZ1), transcript variant 1, mRNA.
ILMN_3273493	XR_039545.1	LOC100130092	100130092	MAPRE1	-2.52162	0.425779	0.16541	0.151558	1.08737e-08	4.03976e-07	-1.36054	0.426718	0.299605	0.285014	0.00162103	0.0373429	PREDICTED: misc_RNA (LOC100130092), miscRNA.
ILMN_2085760	NM_005720.2	ARPC1B	10095	ARPC1B	-1.5984	0.26993	0.165381	0.151528	1.09207e-08	4.05152e-07	-1.10646	0.25206	0.324197	0.310118	1.70233e-05	0.00144542	actin related protein 2/3 complex, subunit 1B, 41kDa (ARPC1B), mRNA.	p41-ARC; ARC41; p40-ARC
ILMN_2319000	NM_139354.2	MATK	4145	MATK	-0.937732	0.15836	0.16538	0.151527	1.09225e-08	4.05152e-07	-0.509	0.158431	0.300042	0.285459	0.00149475	0.0352935	megakaryocyte-associated tyrosine kinase (MATK), transcript variant 3, mRNA.	DKFZp434N1212; HHYLTK; CHK; MGC1708; HYLTK; Lsk; MGC2101; CTK; HYL
ILMN_1785852	NM_001031716.1	OBFC2A	64859	OBFC2A	-1.17345	0.198347	0.165188	0.151332	1.12383e-08	4.16538e-07	-0.627798	0.19919	0.298954	0.284349	0.00182943	0.0400191	oligonucleotide/oligosaccharide-binding fold containing 2A (OBFC2A), mRNA.	MGC111163; FLJ22833; DKFZp667M1322; FLJ13624
ILMN_1684576	NM_018941.3	CLN8	2055	CLN8	-3.81848	0.645478	0.165173	0.151317	1.12628e-08	4.17119e-07	-1.83677	0.667698	0.292254	0.27751	0.00639634	0.0926236	ceroid-lipofuscinosis, neuronal 8 (epilepsy, progressive with mental retardation) (CLN8), mRNA.	FLJ39417; EPMR; C8orf61
ILMN_1758315	NM_173653.1	SLC9A9	285195	SLC9A9	-1.91454	0.323719	0.165118	0.151261	1.13555e-08	4.20225e-07	-1.43832	0.295718	0.335443	0.321598	2.08456e-06	0.000315985	solute carrier family 9 (sodium/hydrogen exchanger), member 9 (SLC9A9), mRNA.	NHE9; Nbla00118; FLJ35613
ILMN_2383707	NM_170696.1	ALDH1A2	8854	ALDH1A2	-2.58836	0.437883	0.165006	0.151147	1.15448e-08	4.25896e-07	-1.48311	0.431123	0.304246	0.289751	0.000685606	0.0204833	aldehyde dehydrogenase 1 family, member A2 (ALDH1A2), transcript variant 2, mRNA.	MGC26444; RALDH(II); RALDH2; RALDH2-T
ILMN_2366391	NM_181696.1	PRDX1	5052	PRDX1	-1.94451	0.3291	0.164917	0.151057	1.16985e-08	4.30422e-07	-1.21504	0.316091	0.312279	0.297951	0.000155098	0.00717031	peroxiredoxin 1 (PRDX1), transcript variant 2, mRNA.	MSP23; PAG; PAGB; PAGA; PRX1; NKEFA; TDPX2
ILMN_1677723	NM_001146.3	ANGPT1	284	ANGPT1	-1.15048	0.194716	0.164914	0.151053	1.17039e-08	4.30422e-07	-0.620757	0.194987	0.29952	0.284926	0.00164701	0.0377026	angiopoietin 1 (ANGPT1), mRNA.	ANG1; AGP1; AGPT
ILMN_1775522	NM_001005332.1	MAGED1	9500	MAGED1	-1.53578	0.259944	0.1649	0.151039	1.17283e-08	4.3065e-07	-1.00818	0.246227	0.317607	0.30339	5.78458e-05	0.00358553	melanoma antigen family D, 1 (MAGED1), transcript variant 3, mRNA.	NRAGE; DLXIN-1	D
ILMN_1796508	XM_001130368.1	TOP1MT	116447	TOP1MT	-3.63367	0.615116	0.164871	0.15101	1.17789e-08	4.31839e-07	-2.01766	0.610941	0.301674	0.287125	0.0011042	0.0285689	PREDICTED: topoisomerase (DNA) I, mitochondrial (TOP1MT), mRNA.
ILMN_1779547	NM_006665.2	HPSE	10855	HPSE	-3.74427	0.633954	0.164832	0.150971	1.18457e-08	4.33616e-07	-2.29591	0.6121	0.310365	0.295998	0.000220972	0.00920303	heparanase (HPSE), mRNA.	HPA; HSE1; HPSE1; HPR1
ILMN_1811579	NM_004838.2	HOMER3	9454	HOMER3	-3.10281	0.5255	0.16477	0.150907	1.19558e-08	4.36969e-07	-1.69482	0.524289	0.300399	0.285824	0.00139879	0.0337308	homer homolog 3 (Drosophila) (HOMER3), mRNA.	HOMER-3
ILMN_1756595	NM_018986.3	SH3TC1	54436	SH3TC1	-2.71226	0.459345	0.164775	0.150912	1.19469e-08	4.36969e-07	-1.37177	0.468282	0.29514	0.280456	0.00372383	0.0654459	SH3 domain and tetratricopeptide repeats 1 (SH3TC1), mRNA.	FLJ36243; FLJ20356; FLJ46394; FLJ32999
ILMN_1712678	NM_015920.3	RPS27L	51065	RPS27L	-1.6694	0.282841	0.16469	0.150826	1.20982e-08	4.41831e-07	-0.870113	0.285896	0.297068	0.282423	0.00259903	0.0514281	ribosomal protein S27-like (RPS27L), mRNA.
ILMN_1788223	NM_031924.3	RSPH3	83861	RSPH3	-2.3691	0.401509	0.164627	0.150762	1.22116e-08	4.45286e-07	-1.50272	0.383896	0.313751	0.299454	0.000118124	0.00596884	radial spoke 3 homolog (Chlamydomonas) (RSPH3), mRNA.	dJ111C20.1; RSHL2; RSP3
ILMN_2370976	NM_013451.2	FER1L3	26509	MYOF	-1.74297	0.295435	0.164598	0.150732	1.22644e-08	4.46523e-07	-0.874458	0.301753	0.294621	0.279925	0.00410393	0.0696167	fer-1-like 3, myoferlin (C. elegans) (FER1L3), transcript variant 1, mRNA.	FLJ36571; FLJ90777; MYOF
ILMN_1762003	NM_003262.3	SEC62	7095	SEC62	-1.80707	0.306488	0.164469	0.150601	1.2501e-08	4.54436e-07	-1.13641	0.293704	0.312805	0.298489	0.000140711	0.00676218	SEC62 homolog (S. cerevisiae) (SEC62), mRNA.	HTP1; SEC62; FLJ32803; Dtrp1
ILMN_1659206	NM_000964.2	RARA	5914	RARA	-1.34346	0.228006	0.164331	0.150461	1.27591e-08	4.63109e-07	-0.81192	0.220923	0.308835	0.294436	0.000293268	0.0112855	retinoic acid receptor, alpha (RARA), transcript variant 1, mRNA.	NR1B1; RAR
ILMN_1689160	NM_022355.1	DPEP2	64174	DPEP2	-1.12752	0.191381	0.164306	0.150436	1.28063e-08	4.6411e-07	-0.607915	0.191499	0.299358	0.284761	0.00169723	0.0382963	dipeptidase 2 (DPEP2), mRNA.	MBD2
ILMN_1804562	NM_001859.2	SLC31A1	1317	SLC31A1	-1.80382	0.306267	0.164241	0.15037	1.293e-08	4.68231e-07	-1.11397	0.294921	0.310903	0.296546	0.000200071	0.00853985	solute carrier family 31 (copper transporters), member 1 (SLC31A1), mRNA.	hCTR1; COPT1; MGC75487; CTR1
ILMN_1792409	NM_133265.2	AMOT	154796	AMOT	-0.778087	0.132199	0.1641	0.150226	1.32036e-08	4.7668e-07	-0.475404	0.127664	0.309817	0.295438	0.000244567	0.00989441	angiomotin (AMOT), transcript variant 2, mRNA.	KIAA1071
ILMN_1765109	NM_148973.1	TNFRSF25	8718	TNFRSF25	-0.99694	0.169429	0.164043	0.150168	1.33154e-08	4.79983e-07	-0.566232	0.167004	0.303309	0.288795	0.000815511	0.0231937	tumor necrosis factor receptor superfamily, member 25 (TNFRSF25), transcript variant 10, mRNA.	WSL-LR; TNFRSF12; TR3; LARD; DDR3; TRAMP; WSL-1; APO-3; DR3
ILMN_2201678	NM_007085.3	FSTL1	11167	FSTL1	-1.16305	0.19767	0.164031	0.150156	1.33397e-08	4.80494e-07	-0.681388	0.193143	0.305932	0.291472	0.000501815	0.0166212	follistatin-like 1 (FSTL1), mRNA.	FRP; FSL1
ILMN_2138589	NM_006343.2	MERTK	10461	MERTK	-1.54279	0.262239	0.164007	0.150132	1.33859e-08	4.8179e-07	-0.970136	0.251187	0.312659	0.298339	0.00014458	0.00687566	c-mer proto-oncogene tyrosine kinase (MERTK), mRNA.	MGC133349; c-mer; RP38; MER
ILMN_1768510	NM_015274.1	MAN2B2	23324	MAN2B2	-1.4012	0.238252	0.163938	0.150061	1.35245e-08	4.86041e-07	-0.697957	0.24352	0.2941	0.279393	0.00452426	0.0737828	mannosidase, alpha, class 2B, member 2 (MAN2B2), mRNA.	KIAA0935
ILMN_1763540	NM_014614.1	PSME4	23198	PSME4	-1.61916	0.275711	0.163635	0.149753	1.41446e-08	5.05634e-07	-0.848757	0.277738	0.297282	0.282643	0.00249706	0.0500406	proteasome (prosome, macropain) activator subunit 4 (PSME4), mRNA.	FLJ21864; MGC142228; MGC138374; PA200; KIAA0077
ILMN_1738523	NM_002468.3	MYD88	4615	MYD88	-2.11101	0.359489	0.163619	0.149737	1.41778e-08	5.06437e-07	-1.11057	0.361763	0.297523	0.282888	0.00238781	0.04853	myeloid differentiation primary response gene (88) (MYD88), mRNA.
ILMN_1787705	NM_001693.3	ATP6V1B2	526	ATP6V1B2	-1.29919	0.221358	0.163511	0.149627	1.44064e-08	5.13441e-07	-0.737309	0.218075	0.30313	0.288612	0.000843009	0.0236472	ATPase, H+ transporting, lysosomal 56/58kDa, V1 subunit B2 (ATP6V1B2), mRNA.	VATB; VPP3; ATP6B2; ATP6B1B2; Vma2; HO57
ILMN_1775542	NM_005449.3	FAIM3	9214	FAIM3	-0.970693	0.165413	0.163478	0.149594	1.44759e-08	5.1553e-07	-0.562787	0.161982	0.3049	0.290419	0.000607385	0.0189109	Fas apoptotic inhibitory molecule 3 (FAIM3), mRNA.	TOSO
ILMN_1670145	NM_004403.2	DFNA5	1687	DFNA5	-1.09923	0.187452	0.163327	0.14944	1.48046e-08	5.25653e-07	-0.729688	0.176777	0.318332	0.30413	5.05711e-05	0.00328531	deafness, autosomal dominant 5 (DFNA5), transcript variant 1, mRNA.	ICERE-1
ILMN_1748755	NM_012281.2	KCND2	3751	KCND2	-2.00491	0.341928	0.163308	0.149421	1.48445e-08	5.26672e-07	-1.16699	0.334392	0.305198	0.290723	0.00057481	0.0182206	potassium voltage-gated channel, Shal-related subfamily, member 2 (KCND2), mRNA.	KV4.2; MGC119703; RK5; KIAA1044; MGC119702
ILMN_1745994	NM_201433.1	GAS7	8522	GAS7	-1.19765	0.20433	0.16323	0.149342	1.50169e-08	5.31992e-07	-0.710156	0.198776	0.306804	0.292363	0.000426997	0.0149477	growth arrest-specific 7 (GAS7), transcript variant c, mRNA.	MGC1348; MLL/GAS7; KIAA0394
ILMN_1657302	NM_177536.1	SULT1A1	6817	SULT1A1	-3.99331	0.681509	0.163165	0.149276	1.51626e-08	5.3635e-07	-3.1776	0.613222	0.343399	0.32972	4.65918e-07	0.000115849	sulfotransferase family, cytosolic, 1A, phenol-preferring, member 1 (SULT1A1), transcript variant 5, mRNA.	HAST1/HAST2; MGC5163; P-PST; MGC131921; ST1A3; TSPST1; STP1; STP; PST
ILMN_1815205	NM_000239.1	LYZ	4069	LYZ	-0.346945	0.0592449	0.163044	0.149153	1.54365e-08	5.44816e-07	-0.209768	0.0573107	0.308536	0.294131	0.000309925	0.0117732	lysozyme (renal amyloidosis) (LYZ), mRNA.
ILMN_2346573	NM_005789.2	PSME3	10197	PSME3	-2.20222	0.376166	0.162983	0.14909	1.55771e-08	5.4896e-07	-1.38843	0.359673	0.312618	0.298297	0.000145676	0.00691032	proteasome (prosome, macropain) activator subunit 3 (PA28 gamma; Ki) (PSME3), transcript variant 1, mRNA.	PA28-gamma; Ki; PA28G; REG-GAMMA
ILMN_1680624	NM_003851.2	CREG1	8804	CREG1	-1.7639	0.301671	0.162724	0.148827	1.61854e-08	5.69973e-07	-1.13614	0.286684	0.31478	0.300504	9.76452e-05	0.00519904	cellular repressor of E1A-stimulated genes 1 (CREG1), mRNA.	CREG
ILMN_1694810	NM_052839.2	PANX2	56666	PANX2	-2.82638	0.483572	0.162642	0.148744	1.63834e-08	5.76086e-07	-1.62689	0.47396	0.304102	0.289604	0.000704097	0.0209174	pannexin 2 (PANX2), mRNA.	hPANX2; MGC119432
ILMN_2224486	NM_020685.3	C3orf14	57415	C3orf14	-1.60073	0.273924	0.162603	0.148704	1.64774e-08	5.78963e-07	-0.869958	0.272747	0.299627	0.285036	0.00161441	0.0373109	chromosome 3 open reading frame 14 (C3orf14), mRNA.	HT021
ILMN_1653501	NM_001005914.1	SEMA3B	7869	SEMA3B	-1.31475	0.225023	0.162569	0.14867	1.65605e-08	5.81019e-07	-0.761649	0.220139	0.304622	0.290135	0.000639462	0.0196381	sema domain, immunoglobulin domain (Ig), short basic domain, secreted, (semaphorin) 3B (SEMA3B), transcript variant 2, mRNA.	FLJ34863; SEMAA; SEMA5; semaV; SemA; LUCA-1
ILMN_2412336	NM_001354.4	AKR1C2	1646	AKR1C2	-0.896353	0.153569	0.162358	0.148455	1.70845e-08	5.98072e-07	-0.592855	0.144848	0.317573	0.303355	5.8211e-05	0.00359403	aldo-keto reductase family 1, member C2 (dihydrodiol dehydrogenase 2; bile acid binding protein; 3-alpha hydroxysteroid dehydrogenase, type III) (AKR1C2), transcript variant 1, mRNA. XM_943424 XM_943425 XM_943427	BABP; HBAB; AKR1C-pseudo; DD; HAKRD; DD2; MCDR2; DDH2
ILMN_1733311	NM_004855.4	PIGB	9488	PIGB	-2.40782	0.412546	0.162346	0.148443	1.71146e-08	5.9868e-07	-1.57814	0.390069	0.316551	0.302312	7.03431e-05	0.00409771	phosphatidylinositol glycan anchor biosynthesis, class B (PIGB), mRNA.	MGC21236
ILMN_1652082	NM_001421.2	ELF4	2000	ELF4	-2.09621	0.359226	0.162306	0.148402	1.72179e-08	6.01405e-07	-0.996225	0.370586	0.291279	0.276514	0.00768611	0.104216	E74-like factor 4 (ets domain transcription factor) (ELF4), mRNA.	MEF; ELFR
ILMN_1790529	NM_002345.3	LUM	4060	LUM	-0.829054	0.142126	0.16223	0.148325	1.7412e-08	6.07289e-07	-0.490814	0.138153	0.306414	0.291964	0.000458967	0.015774	lumican (LUM), mRNA.	SLRR2D; LDC
ILMN_1728512	NM_003405.3	YWHAH	7533	YWHAH	-1.56854	0.268907	0.162223	0.148318	1.74289e-08	6.0743e-07	-0.850502	0.267762	0.299391	0.284795	0.00168699	0.0381533	tyrosine 3-monooxygenase/tryptophan 5-monooxygenase activation protein, eta polypeptide (YWHAH), mRNA.	YWHA1
ILMN_1683026	NM_002801.2	PSMB10	5699	PSMB10	-1.74845	0.299818	0.162175	0.14827	1.75524e-08	6.11283e-07	-1.05368	0.289997	0.308003	0.293586	0.000342078	0.0126392	proteasome (prosome, macropain) subunit, beta type, 10 (PSMB10), mRNA.	beta2i; MGC1665; LMP10; MECL1
ILMN_1691892	NM_003564.1	TAGLN2	8407	TAGLN2	-1.90836	0.327397	0.162076	0.148168	1.78125e-08	6.19429e-07	-1.13481	0.317796	0.306769	0.292327	0.000429755	0.0150332	transgelin 2 (TAGLN2), mRNA.	KIAA0120; HA1756
ILMN_3297126	NM_001113755.1	TYMP	1890	TYMP	-2.00749	0.34442	0.162066	0.148159	1.78378e-08	6.19853e-07	-1.04465	0.346709	0.296548	0.281892	0.00286358	0.0547689	thymidine phosphorylase (TYMP), transcript variant 1, mRNA.	TP; ECGF1; PDECGF; hPD-ECGF; MNGIE
ILMN_1766405	NM_177937.1	GOLM1	51280	GOLM1	-3.73308	0.640728	0.161984	0.148075	1.80554e-08	6.26495e-07	-1.92397	0.646567	0.295915	0.281247	0.00322231	0.0593673	golgi membrane protein 1 (GOLM1), transcript variant 2, mRNA.	bA379P1.3; GP73; FLJ23608; FLJ22634; C9orf155; PSEC0257; GOLPH2
ILMN_1689836	NM_001736.3	C5AR1	728	C5AR1	-1.01455	0.174186	0.161922	0.148012	1.82222e-08	6.31732e-07	-0.569369	0.171745	0.301907	0.287363	0.00105749	0.027767	complement component 5a receptor 1 (C5AR1), mRNA.	CD88; C5AR; C5A; C5R1
ILMN_1697567	NM_152263.2	TPM3	7170	TPM3	-1.85569	0.318777	0.161806	0.147894	1.8537e-08	6.41324e-07	-0.948433	0.322301	0.295362	0.280682	0.00357256	0.0635233	tropomyosin 3 (TPM3), transcript variant 1, mRNA.	TM30; MGC3261; TRK; NEM1; TM30nm; FLJ41118; OK/SW-cl.5; TM-5; TPMsk3; hscp30; MGC14582; TM3; MGC72094
ILMN_2053178	NM_001614.2	ACTG1	71	ACTG1	-2.32209	0.399014	0.161745	0.147832	1.8705e-08	6.46661e-07	-1.27953	0.395286	0.300478	0.285905	0.00137838	0.0334913	actin, gamma 1 (ACTG1), mRNA.	DFNA26; ACTG; DFNA20; ACT
ILMN_2354381	NM_000305.2	PON2	5445	PON2	-1.895	0.325711	0.16169	0.147777	1.88564e-08	6.51419e-07	-0.98619	0.327657	0.296493	0.281837	0.00289292	0.0550796	paraoxonase 2 (PON2), transcript variant 1, mRNA.
ILMN_1678833	NM_001295.2	CCR1	1230	CCR1	-1.69451	0.29129	0.161664	0.147749	1.89316e-08	6.53032e-07	-1.03763	0.280357	0.309357	0.294969	0.000266274	0.0105382	chemokine (C-C motif) receptor 1 (CCR1), mRNA.	HM145; MIP1aR; CKR-1; CD191; CMKBR1; SCYAR1
ILMN_1809928	NM_001849.3	COL6A2	1292	COL6A2	-1.15531	0.198721	0.161538	0.147622	1.92854e-08	6.61889e-07	-0.657655	0.195073	0.302949	0.288427	0.000871746	0.0242235	collagen, type VI, alpha 2 (COL6A2), transcript variant 2C2, mRNA.	PP3610; DKFZp586E1322
ILMN_1675386	NM_001266.4	CES1	1066		-0.524465	0.0902356	0.161483	0.147565	1.94444e-08	6.6556e-07	-0.341686	0.085392	0.315597	0.301338	8.39359e-05	0.00463205	carboxylesterase 1 (monocyte/macrophage serine esterase 1) (CES1), transcript variant 3, mRNA.	HMSE1; PCE-1; CES2; TGH; SES1; HMSE; ACAT; MGC117365; CEH
ILMN_1703335	NM_032857.2	LACTB	114294	LACTB	-1.55837	0.268338	0.161317	0.147397	1.99268e-08	6.80162e-07	-0.847157	0.266633	0.299407	0.284811	0.00168197	0.0381462	lactamase, beta (LACTB), nuclear gene encoding mitochondrial protein, transcript variant 1, mRNA.	FLJ14902; G24; MRPL56
ILMN_1796712	NM_002966.1	S100A10	6281	S100A10	-1.19798	0.206352	0.161247	0.147325	2.0134e-08	6.86037e-07	-0.653632	0.204816	0.299658	0.285067	0.00160534	0.0371988	S100 calcium binding protein A10 (annexin II ligand, calpactin I, light polypeptide (p11)) (S100A10), mRNA.	ANX2L; MGC111133; ANX2LG; GP11; p10; P11; Ca[1]; CAL1L; 42C; CLP11
ILMN_2220739	NM_017905.3	TMCO3	55002	TMCO3	-2.03348	0.350442	0.161144	0.147221	2.04404e-08	6.95178e-07	-1.01658	0.355964	0.293933	0.279223	0.00466805	0.0751432	transmembrane and coiled-coil domains 3 (TMCO3), mRNA.	C13orf11; FLJ20623
ILMN_1662799	NM_022107.1	GPSM3	63940	GPSM3	-1.0255	0.176876	0.160975	0.14705	2.0957e-08	7.12027e-07	-0.569873	0.174625	0.300958	0.286395	0.00126099	0.03145	G-protein signaling modulator 3 (AGS3-like, C. elegans) (GPSM3), mRNA.	C6orf9; G18; G18.1a; G18.2; G18.1b; NG1
ILMN_2377900	NM_032010.1	MAP1B	4131	MAP1B	-0.838276	0.144645	0.160888	0.146961	2.1229e-08	7.20233e-07	-0.43334	0.145568	0.295936	0.281268	0.00320995	0.0592135	microtubule-associated protein 1B (MAP1B), transcript variant 2, mRNA.	FUTSCH; MAP5; DKFZp686F1345; DKFZp686E1099; FLJ38954
ILMN_1715674	NM_014216.3	ITPK1	3705	ITPK1	-1.15503	0.199345	0.160844	0.146916	2.13684e-08	7.23923e-07	-0.662101	0.195131	0.303357	0.288844	0.000808222	0.0230822	inositol 1,3,4-triphosphate 5/6 kinase (ITPK1), mRNA.	ITRPK1
ILMN_1756439	NM_014766.3	SCRN1	9805	SCRN1	-1.78104	0.307537	0.160743	0.146814	2.16873e-08	7.33674e-07	-1.12136	0.293497	0.311797	0.29746	0.00016955	0.00759347	secernin 1 (SCRN1), mRNA.	SES1; KIAA0193
ILMN_2099783	NM_004231.2	ATP6V1F	9296	ATP6V1F	-1.8341	0.316782	0.160689	0.146758	2.18624e-08	7.3907e-07	-1.14032	0.303323	0.31054	0.296176	0.000213967	0.00899499	ATPase, H+ transporting, lysosomal 14kDa, V1 subunit F (ATP6V1F), mRNA.	Vma7; MGC126038; ATP6S14; MGC126037; MGC117321; VATF
ILMN_1746836	NM_000952.3	PTAFR	5724	PTAFR	-2.13333	0.368494	0.160673	0.146742	2.19151e-08	7.40255e-07	-1.28839	0.355594	0.307801	0.29338	0.000355108	0.0129988	platelet-activating factor receptor (PTAFR), mRNA.	PAFR
ILMN_2038775	NM_001069.2	TUBB2A	7280	TUBB2A	-0.620242	0.107138	0.160668	0.146737	2.19287e-08	7.40255e-07	-0.318063	0.108009	0.295397	0.280718	0.00354938	0.0633212	tubulin, beta 2A (TUBB2A), mRNA.	TUBB; TUBB2; dJ40E16.7
ILMN_1784352	NM_001029835.1	CCM2	83605	CCM2	-1.92936	0.333423	0.160574	0.146641	2.22366e-08	7.49579e-07	-1.07641	0.328636	0.301176	0.286617	0.00121101	0.030497	cerebral cavernous malformation 2 (CCM2), transcript variant 1, mRNA.	MGC74868; MGC4067; MGC4607; C7orf22; PP10187
ILMN_3256478	XM_001720357.1	LOC100129034	100129034	LOC100129034	-2.29836	0.397308	0.160514	0.14658	2.24343e-08	7.55702e-07	-1.33905	0.387046	0.304619	0.290131	0.000639879	0.0196382	PREDICTED: hypothetical protein LOC100129034 (LOC100129034), mRNA.
ILMN_1659766	NM_004281.3	BAG3	9531	BAG3	-1.55741	0.269344	0.160422	0.146487	2.27401e-08	7.65459e-07	-0.922402	0.261203	0.305999	0.291541	0.000495598	0.0165411	BCL2-associated athanogene 3 (BAG3), mRNA.	BAG-3; MGC104307; CAIR-1; BIS
ILMN_1751097	NM_194071.2	CREB3L2	64764	CREB3L2	-2.08843	0.361232	0.160393	0.146458	2.28383e-08	7.68219e-07	-1.38903	0.339659	0.317497	0.303278	5.90304e-05	0.0036163	cAMP responsive element binding protein 3-like 2 (CREB3L2), mRNA.	MGC131709; BBF2H7; MGC71006
ILMN_1660544	NM_183376.1	ARRDC4	91947	ARRDC4	-3.48681	0.603405	0.160292	0.146355	2.31807e-08	7.77523e-07	-2.28383	0.56961	0.31577	0.301515	8.12893e-05	0.00453361	arrestin domain containing 4 (ARRDC4), mRNA.	FLJ36045
ILMN_2367418	NM_133169.2	OSCAR	126014	OSCAR	-1.66216	0.287763	0.160206	0.146268	2.34752e-08	7.86287e-07	-0.89723	0.28598	0.298701	0.284091	0.00191769	0.0413945	osteoclast-associated receptor (OSCAR), transcript variant 4, mRNA.	MGC33613; PIGR3
ILMN_1702301	NM_014689.2	DOCK10	55619	DOCK10	-1.39955	0.242409	0.160113	0.146173	2.38014e-08	7.95522e-07	-0.812406	0.236259	0.304218	0.289722	0.000689178	0.0205479	dedicator of cytokinesis 10 (DOCK10), mRNA.	Nbla10300; DKFZp781A1532; DRIP2; ZIZ3
ILMN_1801205	NM_001005340.1	GPNMB	10457	GPNMB	-0.749302	0.129862	0.159989	0.146047	2.42415e-08	8.06811e-07	-0.430993	0.126856	0.30344	0.288928	0.000795951	0.0228089	glycoprotein (transmembrane) nmb (GPNMB), transcript variant 1, mRNA.	NMB; HGFIN
ILMN_1662618	NM_003900.3	SQSTM1	8878	SQSTM1	-1.05535	0.182973	0.159912	0.145968	2.45181e-08	8.15444e-07	-0.685357	0.173056	0.314722	0.300445	9.86928e-05	0.005221	sequestosome 1 (SQSTM1), mRNA.	OSIL; p62B; p60; ZIP3; PDB3; p62; A170
ILMN_2192072	NM_002423.3	MMP7	4316	MMP7	-0.685792	0.11893	0.159861	0.145917	2.47032e-08	8.2102e-07	-0.449861	0.112183	0.315783	0.301528	8.10933e-05	0.00453337	matrix metallopeptidase 7 (matrilysin, uterine) (MMP7), mRNA.	MMP-7; PUMP-1; MPSL1
ILMN_2352303	NM_170774.1	RASSF2	9770	RASSF2	-1.04955	0.182155	0.159703	0.145756	2.52865e-08	8.39818e-07	-0.580856	0.179699	0.300395	0.28582	0.00139977	0.0337308	Ras association (RalGDS/AF-6) domain family member 2 (RASSF2), transcript variant 2, mRNA.	DKFZp781O1747; KIAA0168
ILMN_1658639	NM_181785.2	SLC46A3	283537	SLC46A3	-1.87242	0.325142	0.159593	0.145645	2.56972e-08	8.52261e-07	-1.27521	0.303662	0.319912	0.305743	3.77307e-05	0.00264361	solute carrier family 46, member 3 (SLC46A3), mRNA.	FLJ42613; FKSG16; RP11-97E23.2
ILMN_1727740	NM_006372.3	SYNCRIP	10492	SYNCRIP	-2.07769	0.360983	0.159483	0.145532	2.61192e-08	8.64437e-07	-1.43575	0.335856	0.321596	0.307462	2.76039e-05	0.00208546	synaptotagmin binding, cytoplasmic RNA interacting protein (SYNCRIP), mRNA.	dJ3J17.2; pp68; RP1-3J17.2; HNRPQ1; hnRNP-Q; NSAP1; GRY-RBP
ILMN_3255061	NM_001033555.1	CYTSB	92521	SPECC1	-2.4605	0.427642	0.159412	0.14546	2.63946e-08	8.72942e-07	-1.27283	0.429204	0.295745	0.281073	0.00332629	0.0605789	cytospin B (CYTSB), transcript variant NSP5alpha3beta, mRNA.	HCMOGT-1; NSP; FLJ36955
ILMN_3240077	NM_001101393.1	LOC645993	645993		-2.0789	0.361394	0.15937	0.145417	2.65587e-08	8.77754e-07	-1.40486	0.338139	0.318923	0.304734	4.53233e-05	0.0030233	similar to ribosomal protein L31 (LOC645993), mRNA.
ILMN_2277419	NM_001037984.1	SLC38A10	124565	SLC38A10	-2.34879	0.40854	0.159256	0.145302	2.70073e-08	8.90723e-07	-1.44388	0.391764	0.309045	0.294651	0.000282079	0.010989	solute carrier family 38, member 10 (SLC38A10), transcript variant 1, mRNA.	FLJ35718; MGC15523; PP1744
ILMN_1745806	NM_148172.1	PEMT	10400	PEMT	-0.567654	0.0987358	0.159256	0.145302	2.70076e-08	8.90723e-07	-0.346526	0.0948557	0.308397	0.293988	0.000318036	0.0119648	phosphatidylethanolamine N-methyltransferase (PEMT), nuclear gene encoding mitochondrial protein, transcript variant 1, mRNA.	PEAMT; MGC2483; PEMPT; PNMT; PEMT2	D
ILMN_1780058	NM_003676.2	DEGS1	8560	DEGS1	-1.81017	0.314884	0.159238	0.145283	2.70809e-08	8.92519e-07	-1.159	0.298741	0.313021	0.298709	0.000135191	0.00659149	degenerative spermatocyte homolog 1, lipid desaturase (Drosophila) (DEGS1), transcript variant 1, mRNA.	MLD; MIG15; FADS7; DES1; DEGS; Des-1; MGC5079
ILMN_1672591	NM_002977.2	SCN9A	6335	SCN9A	-2.18762	0.380552	0.159232	0.145277	2.71036e-08	8.92646e-07	-1.31274	0.367244	0.306842	0.292401	0.000424035	0.014855	sodium channel, voltage-gated, type IX, alpha subunit (SCN9A), mRNA.	NE-NA; NENA; ETHA; Nav1.7; PN1
ILMN_2412192	NM_001014975.1	CFH	3075	CFH	-0.735837	0.1281	0.15908	0.145123	2.77151e-08	9.12148e-07	-0.354745	0.13082	0.291642	0.276884	0.00717814	0.0993511	complement factor H (CFH), transcript variant 2, mRNA.	HUS; MGC88246; HF1; FH; ARMD4; ARMS1; HF; CFHL3; FHL1; HF2
ILMN_1730710	NM_000677.3	ADORA3	140	ADORA3	-3.40409	0.592664	0.159061	0.145104	2.77936e-08	9.14097e-07	-2.26083	0.556875	0.316855	0.302622	6.64937e-05	0.00394079	adenosine A3 receptor (ADORA3), transcript variant 2, mRNA.	AD026; RP11-552M11.7; A3AR; bA552M11.5
ILMN_1658619	NM_015238.1	WWC1	23286	WWC1	-3.34764	0.582855	0.159055	0.145097	2.782e-08	9.14328e-07	-1.75318	0.582776	0.296468	0.281811	0.00290661	0.0552513	WW and C2 domain containing 1 (WWC1), mRNA.	FLJ10865; KIAA0869; KIBRA; FLJ23369
ILMN_1813846	NM_002560.2	P2RX4	5025	P2RX4	-1.94493	0.338846	0.158926	0.144967	2.83519e-08	9.31163e-07	-1.26752	0.319907	0.314761	0.300485	9.79872e-05	0.00520697	purinergic receptor P2X, ligand-gated ion channel, 4 (P2RX4), mRNA.	P2X4R; P2X4
ILMN_1718063	NM_000235.2	LIPA	3988	LIPA	-0.678252	0.118172	0.158914	0.144954	2.84031e-08	9.31552e-07	-0.399734	0.114539	0.305199	0.290724	0.000574716	0.0182206	lipase A, lysosomal acid, cholesterol esterase (LIPA), transcript variant 2, mRNA.	CESD; LAL
ILMN_1811258	NM_006509.2	RELB	5971	RELB	-4.10766	0.716116	0.158791	0.144829	2.89231e-08	9.46636e-07	-2.3442	0.699878	0.302541	0.28801	0.00094025	0.0255711	v-rel reticuloendotheliosis viral oncogene homolog B (RELB), mRNA.	I-REL
ILMN_1755643	NM_012214.2	MGAT4A	11320	MGAT4A	-3.37812	0.589288	0.158668	0.144704	2.945e-08	9.6255e-07	-2.04273	0.567169	0.307374	0.292944	0.000384272	0.0138204	mannosyl (alpha-1,3-)-glycoprotein beta-1,4-N-acetylglucosaminyltransferase, isozyme A (MGAT4A), transcript variant 1, mRNA.	GNT-IVA; GNT-IV
ILMN_1701655	NM_024959.2	SLC24A6	80024	SLC24A6	-1.59592	0.278516	0.158582	0.144616	2.98276e-08	9.73546e-07	-0.886685	0.274035	0.300455	0.285881	0.00138447	0.0335608	solute carrier family 24 (sodium/potassium/calcium exchanger), member 6 (SLC24A6), mRNA.	FLJ22233; NCLX; NCKX6
ILMN_1711470	NM_014176.2	UBE2T	29089	UBE2T	-4.12959	0.72106	0.158477	0.144509	3.02944e-08	9.86737e-07	-3.059	0.658991	0.330084	0.316128	5.6835e-06	0.000655599	ubiquitin-conjugating enzyme E2T (putative) (UBE2T), mRNA.	HSPC150; PIG50
ILMN_1802653	NM_005755.2	EBI3	10148	EBI3	-3.54999	0.620063	0.158409	0.144441	3.05953e-08	9.94485e-07	-2.00819	0.607084	0.301773	0.287226	0.00108413	0.028172	Epstein-Barr virus induced 3 (EBI3), mRNA.
ILMN_1742981	NM_006009.2	TUBA1A	7846	TUBA1A	-1.13897	0.199138	0.158208	0.144237	3.15156e-08	1.02299e-06	-0.636137	0.195562	0.300766	0.286199	0.00130673	0.0322381	tubulin, alpha 1a (TUBA1A), mRNA.	LIS3; FLJ25113; TUBA3; B-ALPHA-1
ILMN_2351298	NM_001077269.1	WIPF1	7456	WIPF1	-2.01474	0.35246	0.158093	0.14412	3.20536e-08	1.03761e-06	-1.09587	0.348451	0.298835	0.284227	0.0018706	0.0406749	WAS/WASL interacting protein family, member 1 (WIPF1), transcript variant 2, mRNA.	WIP; WASPIP; PRPL-2; MGC111041
ILMN_1730906	NM_182909.2	FILIP1L	11259	FILIP1L	-1.33234	0.233078	0.158095	0.144121	3.20454e-08	1.03761e-06	-0.757648	0.227792	0.302107	0.287568	0.00101896	0.0271411	filamin A interacting protein 1-like (FILIP1L), transcript variant 1, mRNA.	DOC-1; GIP90; DOC1
ILMN_1663618	NM_213662.1	STAT3	6774	STAT3	-1.93189	0.338239	0.157932	0.143955	3.2825e-08	1.05989e-06	-1.19131	0.323628	0.308955	0.294559	0.00028682	0.0111418	signal transducer and activator of transcription 3 (acute-phase response factor) (STAT3), transcript variant 3, mRNA.	APRF; FLJ20882; MGC16063
ILMN_1694400	NM_138715.1	MSR1	4481	MSR1	-1.59263	0.278843	0.15793	0.143954	3.28317e-08	1.05989e-06	-0.974016	0.267369	0.308193	0.29378	0.000330246	0.0122788	macrophage scavenger receptor 1 (MSR1), transcript variant SR-AI, mRNA.	SR-A; SCARA1; phSR2; phSR1; CD204
ILMN_1749009	NM_015523.2	REXO2	25996	REXO2	-2.40959	0.421996	0.157874	0.143896	3.31067e-08	1.06804e-06	-1.81164	0.384191	0.331842	0.317922	4.09212e-06	0.000514715	REX2, RNA exonuclease 2 homolog (S. cerevisiae) (REXO2), mRNA.	CGI-114; MGC111570; DKFZP566E144; RFN; SFN
ILMN_1678423	NM_017425.2	SPA17	53340	SPA17	-2.85019	0.499518	0.15773	0.14375	3.3815e-08	1.09015e-06	-1.59073	0.490312	0.300611	0.286041	0.00134482	0.0329356	sperm autoantigenic protein 17 (SPA17), mRNA.	SP17; SP17-1
ILMN_2373495	NM_004893.2	H2AFY	9555	H2AFY	-1.76226	0.309242	0.157475	0.143492	3.51055e-08	1.12867e-06	-1.00144	0.302031	0.301916	0.287372	0.00105574	0.027739	H2A histone family, member Y (H2AFY), transcript variant 2, mRNA.	H2A.y; H2A/y; H2AF12M; MACROH2A1.1; mH2A1; macroH2A1.2; H2AFJ
ILMN_1698605	NM_024334.1	TMEM43	79188	TMEM43	-1.26051	0.221572	0.157135	0.143146	3.6908e-08	1.17941e-06	-0.671485	0.219898	0.297242	0.282602	0.00251579	0.0502669	transmembrane protein 43 (TMEM43), mRNA.	DKFZp586G1919; MGC3222
ILMN_2100815	NM_020644.1	TMEM9B	56674	TMEM9B	-3.07115	0.54042	0.156923	0.14293	3.8076e-08	1.21101e-06	-1.862	0.518769	0.307131	0.292696	0.000401983	0.0142943	TMEM9 domain family, member B (TMEM9B), mRNA.	C11orf15
ILMN_2162972	NM_000239.1	LYZ	4069	LYZ	-1.56519	0.275569	0.156817	0.142822	3.86783e-08	1.22934e-06	-0.954336	0.264116	0.307605	0.29318	0.000368198	0.0134026	lysozyme (renal amyloidosis) (LYZ), mRNA.
ILMN_1763447	NM_012401.2	PLXNB2	23654	PLXNB2	-1.65361	0.291302	0.156703	0.142707	3.93285e-08	1.24749e-06	-0.867608	0.29001	0.296185	0.281522	0.00306412	0.0574373	plexin B2 (PLXNB2), mRNA.	PLEXB2; Nbla00445; MM1; dJ402G11.3; KIAA0315
ILMN_1754121	NM_004383.1	CSK	1445	CSK	-1.79214	0.315761	0.156668	0.142671	3.95329e-08	1.25313e-06	-1.02156	0.307823	0.301971	0.287429	0.00104505	0.02755	c-src tyrosine kinase (CSK), mRNA.	MGC117393
ILMN_1730291	NM_001677.3	ATP1B1	481	ATP1B1	-1.1402	0.201045	0.156519	0.142519	4.04079e-08	1.27878e-06	-0.677225	0.193915	0.305245	0.290771	0.000569767	0.0181353	ATPase, Na+/K+ transporting, beta 1 polypeptide (ATP1B1), transcript variant 1, mRNA.	MGC1798; ATP1B
ILMN_2378376	NM_001017917.1	CYB561	1534	CYB561	-2.09859	0.370057	0.156506	0.142506	4.0487e-08	1.27909e-06	-1.24875	0.356761	0.305397	0.290926	0.000554019	0.0177491	cytochrome b-561 (CYB561), transcript variant 3, mRNA.	FRRS2
ILMN_1795778	NM_001017973.1	P4HA2	8974	P4HA2	-1.76689	0.31177	0.156377	0.142375	4.12626e-08	1.30185e-06	-1.23579	0.288603	0.321754	0.307624	2.68043e-05	0.0020348	prolyl 4-hydroxylase, alpha polypeptide II (P4HA2), transcript variant 2, mRNA.	4-PH alpha 2
ILMN_1723481	NM_004273.2	CHST3	9469	CHST3	-1.57168	0.277348	0.15636	0.142357	4.13668e-08	1.3032e-06	-1.00002	0.262841	0.311467	0.297122	0.000180249	0.00795955	carbohydrate (chondroitin 6) sulfotransferase 3 (CHST3), mRNA.	C6ST; C6ST1
ILMN_1791771	NM_002110.2	HCK	3055	HCK	-1.24325	0.219401	0.156352	0.142349	4.14157e-08	1.3032e-06	-0.657889	0.21784	0.296667	0.282014	0.00280043	0.0540691	hemopoietic cell kinase (HCK), mRNA.	JTK9
ILMN_1653711	NM_001466.2	FZD2	2535	FZD2	-3.85082	0.680254	0.156151	0.142145	4.26537e-08	1.3386e-06	-2.50886	0.640736	0.313776	0.29948	0.000117568	0.00596504	frizzled homolog 2 (Drosophila) (FZD2), mRNA.
ILMN_1696048	NM_032849.2	C13orf33	84935	C13orf33	-1.30698	0.230973	0.156071	0.142064	4.31575e-08	1.35082e-06	-0.818949	0.219677	0.3099	0.295523	0.000240825	0.00980171	chromosome 13 open reading frame 33 (C13orf33), mRNA.	MGC126673; MGC126675; FLJ14834
ILMN_1770610	NM_006343.2	MERTK	10461	MERTK	-2.91961	0.516397	0.155905	0.141895	4.42236e-08	1.38236e-06	-1.89402	0.486815	0.313252	0.298945	0.000129537	0.00638826	c-mer proto-oncogene tyrosine kinase (MERTK), mRNA.	MGC133349; c-mer; MER
ILMN_2307455	NM_181762.1	UBE2A	7319	UBE2A	-2.3537	0.416493	0.155814	0.141803	4.48183e-08	1.39733e-06	-1.5297	0.392424	0.313408	0.299104	0.000125854	0.00626542	ubiquitin-conjugating enzyme E2A (RAD6 homolog) (UBE2A), transcript variant 2, mRNA.	UBC2; RAD6A; HHR6A
ILMN_1744212	NM_005541.3	INPP5D	3635	INPP5D	-2.33722	0.413721	0.155746	0.141733	4.52707e-08	1.4095e-06	-1.19664	0.413737	0.294528	0.27983	0.00417599	0.0703163	inositol polyphosphate-5-phosphatase, 145kDa (INPP5D), transcript variant 2, mRNA.	hp51CN; MGC142140; SHIP; MGC142142; SIP-145; SHIP1; MGC104855
ILMN_1783909	NM_001849.3	COL6A2	1292	COL6A2	-0.921429	0.163192	0.155642	0.141627	4.59705e-08	1.42847e-06	-0.56041	0.156309	0.307052	0.292615	0.000407874	0.014417	collagen, type VI, alpha 2 (COL6A2), transcript variant 2C2, mRNA.	PP3610; DKFZp586E1322
ILMN_1701248	NM_018965.1	TREM2	54209	TREM2	-1.42518	0.252421	0.155633	0.141619	4.60274e-08	1.4293e-06	-0.857881	0.242401	0.306149	0.291694	0.000482001	0.0162132	triggering receptor expressed on myeloid cells 2 (TREM2), mRNA.	Trem2a; Trem2c; TREM-2; Trem2b
ILMN_1796642	NM_000433.2	NCF2	4688	NCF2	-1.32715	0.235082	0.155614	0.141599	4.61587e-08	1.43149e-06	-0.758207	0.228727	0.301901	0.287357	0.00105862	0.0277685	neutrophil cytosolic factor 2 (65kDa, chronic granulomatous disease, autosomal 2) (NCF2), mRNA.	p67phox; NOXA2; P67-PHOX
ILMN_1715760	NM_009587.2	LGALS9	3965	LGALS9	-3.4131	0.604872	0.155516	0.141499	4.68295e-08	1.4504e-06	-1.78977	0.601125	0.295943	0.281276	0.00320521	0.0592109	lectin, galactoside-binding, soluble, 9 (LGALS9), transcript variant 1, mRNA.	MGC125973; MGC117375; ECALECTIN; HUAT; galectin-9; MGC125974
ILMN_2410783	NM_001079804.1	GAA	2548	GAA	-1.66291	0.294733	0.155495	0.141478	4.69717e-08	1.4529e-06	-0.895304	0.290995	0.297641	0.283008	0.00233585	0.0478439	glucosidase, alpha; acid (GAA), transcript variant 3, mRNA.	LYAG
ILMN_2399392	NM_001037633.1	SIL1	64374	SIL1	-2.07842	0.368671	0.155338	0.141319	4.80645e-08	1.48573e-06	-1.50097	0.338452	0.325234	0.311176	1.40381e-05	0.00124562	SIL1 homolog, endoplasmic reticulum chaperone (S. cerevisiae) (SIL1), transcript variant 1, mRNA.	MSS; BAP; ULG5
ILMN_1772224	NM_000890.3	KCNJ5	3762	KCNJ5	-3.73278	0.662468	0.155236	0.141215	4.87943e-08	1.5073e-06	-2.28239	0.633405	0.307408	0.292979	0.000381853	0.0137648	potassium inwardly-rectifying channel, subfamily J, member 5 (KCNJ5), mRNA.	KIR3.4; CIR; KATP1; GIRK4
ILMN_2363273	NM_015919.3	ZNF226	7769	ZNF226	-2.29604	0.407584	0.155188	0.141166	4.91396e-08	1.51638e-06	-1.35512	0.393139	0.304376	0.289883	0.000669337	0.0202272	zinc finger protein 226 (ZNF226), transcript variant 4, mRNA.
ILMN_1736940	NM_000194.1	HPRT1	3251	HPRT1	-2.24088	0.397796	0.155186	0.141164	4.91524e-08	1.51638e-06	-1.14824	0.39736	0.294485	0.279787	0.00420949	0.0706471	hypoxanthine phosphoribosyltransferase 1 (Lesch-Nyhan syndrome) (HPRT1), mRNA.	HPRT; HGPRT
ILMN_2362858	NM_178272.1	PILRA	29992	PILRA	-1.70172	0.302109	0.155171	0.141149	4.92602e-08	1.51773e-06	-0.908732	0.298734	0.297042	0.282397	0.00261172	0.0515735	paired immunoglobin-like type 2 receptor alpha (PILRA), transcript variant 2, mRNA.	FDF03
ILMN_1757347	NM_015264.1	C22orf9	23313	KIAA0930	-3.14739	0.559027	0.155077	0.141054	4.99415e-08	1.53472e-06	-1.9373	0.533527	0.307958	0.29354	0.000344956	0.0127257	chromosome 22 open reading frame 9 (C22orf9), transcript variant 1, mRNA.
ILMN_1728572	NM_018431.3	DOK5	55816	DOK5	-3.95464	0.703013	0.154908	0.140882	5.11985e-08	1.56825e-06	-2.82844	0.646715	0.323829	0.309742	1.82301e-05	0.00153412	docking protein 5 (DOK5), mRNA.	C20orf180; MGC16926
ILMN_1794260	NM_032590.3	FBXL10	84678	KDM2B	-1.91488	0.340519	0.154844	0.140816	5.16858e-08	1.58216e-06	-0.916411	0.345542	0.290725	0.275948	0.00853254	0.110907	F-box and leucine-rich repeat protein 10 (FBXL10), transcript variant 1, mRNA.	CXXC2; Fbl10; JHDM1B; PCCX2
ILMN_1815086	NM_004148.3	NINJ1	4814	NINJ1	-1.42334	0.253207	0.154768	0.140739	5.22656e-08	1.59784e-06	-0.795275	0.247451	0.300062	0.28548	0.00148922	0.035198	ninjurin 1 (NINJ1), mRNA.	NIN1; NINJURIN
ILMN_1658425	NM_004393.2	DAG1	1605	DAG1	-1.98716	0.353752	0.154633	0.140602	5.33117e-08	1.62771e-06	-1.10839	0.345794	0.299909	0.285324	0.00153215	0.0359433	dystroglycan 1 (dystrophin-associated glycoprotein 1) (DAG1), mRNA.	AGRNR; 156DAG; A3a; DAG
ILMN_1699887	NM_021978.2	ST14	6768	ST14	-2.78864	0.496473	0.154617	0.140585	5.34368e-08	1.63048e-06	-1.79703	0.468274	0.312147	0.297816	0.000158943	0.0072981	suppression of tumorigenicity 14 (colon carcinoma, matriptase, epithin) (ST14), mRNA.	TADG-15; MTSP1; MT-SP1; PRSS14; MTSP-1; SNC19; HAI
ILMN_3198918	XR_017256.2	LOC340274	340274	ASS1	-4.32809	0.771453	0.154387	0.140352	5.52693e-08	1.68313e-06	-2.51234	0.746466	0.302843	0.288319	0.000889044	0.0245206	PREDICTED: misc_RNA (LOC340274), miscRNA.		D
ILMN_1685403	NM_002423.3	MMP7	4316	MMP7	-0.728803	0.129913	0.154374	0.140339	5.53746e-08	1.68526e-06	-0.480682	0.121815	0.314418	0.300135	0.000104404	0.00545598	matrix metallopeptidase 7 (matrilysin, uterine) (MMP7), mRNA.	MMP-7; PUMP-1; MPSL1
ILMN_2328378	NM_145322.1	OSBPL3	26031	OSBPL3	-4.08098	0.728019	0.154223	0.140185	5.66185e-08	1.71748e-06	-1.97487	0.735973	0.291203	0.276437	0.00779601	0.105146	oxysterol binding protein-like 3 (OSBPL3), transcript variant 4, mRNA.	MGC21526; DKFZp667P1518; ORP3; OSBP3; KIAA0704; ORP-3
ILMN_1795949	NM_024535.2	CORO7	79585	CORO7	-2.6895	0.479799	0.154219	0.140181	5.66514e-08	1.71748e-06	-1.46036	0.471831	0.29796	0.283335	0.00220096	0.045868	coronin 7 (CORO7), mRNA.	FLJ22021; 0610011B16Rik; FLJ44188; CRN7
ILMN_2111237	NM_002430.2	MN1	4330	MN1	-1.2408	0.22138	0.154197	0.140159	5.68275e-08	1.72172e-06	-0.76649	0.210902	0.308021	0.293605	0.000340899	0.0126154	meningioma (disrupted in balanced translocation) 1 (MN1), mRNA.	MGCR1-PEN; MGCR; MGCR1; dJ353E16.2
ILMN_3251501	NM_001018108.2	SERF2	10169	SERF2	-1.82684	0.326141	0.154076	0.140036	5.78506e-08	1.74823e-06	-1.22954	0.304247	0.316453	0.302212	7.16276e-05	0.00414127	small EDRK-rich factor 2 (SERF2), mRNA.	4F5REL; H4F5rel; FLJ37527; FLJ38557; FAM2C; MGC48826; HsT17089; FLJ20431
ILMN_1774287	NM_001710.4	CFB	629	CFB	-0.907792	0.162076	0.154064	0.140024	5.79499e-08	1.75012e-06	-0.520756	0.15722	0.301853	0.287308	0.00106812	0.0279246	complement factor B (CFB), mRNA.	H2-Bf; CFAB; BFD; BF; GBG; PBF2
ILMN_1718285	NM_022658.3	HOXC8	3224	HOXC8	-1.31677	0.235157	0.154012	0.139971	5.83917e-08	1.76233e-06	-0.83372	0.222637	0.310241	0.295871	0.000226117	0.00937246	homeobox C8 (HOXC8), mRNA.	HOX3; HOX3A
ILMN_1784651	NM_000262.1	NAGA	4668	NAGA	-3.72465	0.665242	0.153991	0.13995	5.85721e-08	1.76665e-06	-2.25495	0.636766	0.306191	0.291737	0.000478287	0.0161457	N-acetylgalactosaminidase, alpha- (NAGA), mRNA.	D22S674; GALB
ILMN_2147435	NM_002372.2	MAN2A1	4124	MAN2A1	-2.03505	0.36378	0.153826	0.139781	6.00121e-08	1.80548e-06	-1.03422	0.36327	0.293789	0.279076	0.00479579	0.0762649	mannosidase, alpha, class 2A, member 1 (MAN2A1), mRNA.	GOLIM7; MANII; MANA2
ILMN_3230435	XM_001129280.2	LOC729086	729086	VOPP1	-1.70845	0.305573	0.153714	0.139667	6.10064e-08	1.83306e-06	-0.801114	0.310874	0.289595	0.274795	0.0105655	0.127341	PREDICTED: similar to EGFR-coamplified and overexpressed protein (LOC729086), mRNA.
ILMN_3207122	XR_018203.2	LOC644563	644563	GTF3C6	-1.84859	0.330895	0.153564	0.139515	6.23643e-08	1.8703e-06	-1.24536	0.308493	0.31636	0.302117	7.2877e-05	0.00419811	PREDICTED: misc_RNA (LOC644563), miscRNA.
ILMN_2049536	NM_016113.3	TRPV2	51393	TRPV2	-1.73471	0.310738	0.153422	0.139371	6.36758e-08	1.90721e-06	-0.994756	0.301209	0.301674	0.287125	0.00110424	0.0285689	transient receptor potential cation channel, subfamily V, member 2 (TRPV2), mRNA.	VRL; VRL-1; MGC12549; VRL1
ILMN_1658911	XR_019572.1	LOC647349	647349	AP3S1	-1.91769	0.343741	0.153294	0.139241	6.48807e-08	1.94207e-06	-1.03491	0.338076	0.297373	0.282734	0.00245553	0.0495231	PREDICTED: similar to AP-3 complex subunit sigma-1 (Adapter-related protein complex 3 sigma-1 subunit) (Sigma-adaptin 3a) (AP-3 complex sigma-3A subunit) (Sigma-3A-adaptin) (LOC647349), mRNA.
ILMN_1757370	NM_001007593.1	SMPD1	6609	SMPD1	-3.1636	0.567148	0.153267	0.139213	6.51396e-08	1.94858e-06	-1.95114	0.540003	0.307603	0.293178	0.000368354	0.0134026	sphingomyelin phosphodiesterase 1, acid lysosomal (SMPD1), transcript variant ASM-2, mRNA.	ASM; NPD
ILMN_1756352	NM_014017.1	MAPBPIP	28956	LAMTOR2	-2.43534	0.436682	0.153226	0.139172	6.55241e-08	1.95787e-06	-1.72348	0.402319	0.321797	0.307668	2.6592e-05	0.00202342	mitogen-activated protein-binding protein-interacting protein (MAPBPIP), mRNA.	p14; HSPC003; RP11-336K24.9
ILMN_1729117	NM_000393.3	COL5A2	1290	COL5A2	-1.24212	0.222902	0.153073	0.139016	6.70149e-08	1.99836e-06	-0.696368	0.217155	0.299934	0.28535	0.00152486	0.0358432	collagen, type V, alpha 2 (COL5A2), mRNA.	MGC105115
ILMN_1810289	NM_133337.1	FER1L3	26509	MYOF	-1.08992	0.195604	0.153059	0.139001	6.71569e-08	2.00134e-06	-0.517676	0.198165	0.290124	0.275335	0.00955952	0.119859	fer-1-like 3, myoferlin (C. elegans) (FER1L3), transcript variant 2, mRNA.	FLJ36571; FLJ90777; MYOF
ILMN_1719518	NM_001660.2	ARF4	378	ARF4	-1.59721	0.286672	0.15304	0.138982	6.73439e-08	2.00564e-06	-1.02843	0.270065	0.311537	0.297194	0.000177918	0.0079009	ADP-ribosylation factor 4 (ARF4), mRNA.	ARF2
ILMN_1728047	NM_006066.2	AKR1A1	10327	AKR1A1	-2.0734	0.372194	0.153012	0.138955	6.76123e-08	2.01237e-06	-1.40303	0.34649	0.316626	0.302389	6.93708e-05	0.00406043	aldo-keto reductase family 1, member A1 (aldehyde reductase) (AKR1A1), transcript variant 1, mRNA.	ALR; ALDR1; MGC1380; MGC12529
ILMN_1744487	NM_015645.2	C1QTNF5	114902	C1QTNF5,MFRP	-1.39118	0.249859	0.152912	0.138852	6.86167e-08	2.0397e-06	-0.815585	0.24075	0.303255	0.28874	0.00082364	0.0232821	C1q and tumor necrosis factor related protein 5 (C1QTNF5), mRNA.	LORD; DKFZp586B0621; CTRP5
ILMN_2409290	NM_020739.2	CCPG1	9236	CCPG1,DYX1C1-CCPG1	-3.43473	0.617185	0.152818	0.138757	6.95655e-08	2.06531e-06	-1.93117	0.600652	0.300084	0.285503	0.00148304	0.0351557	cell cycle progression 1 (CCPG1), transcript variant 2, mRNA.	KIAA1254; CPR8
ILMN_1653498	NM_005849.1	IGSF6	10261	IGSF6	-1.37656	0.247582	0.152639	0.138575	7.14121e-08	2.1188e-06	-0.745507	0.243063	0.297475	0.282839	0.00240897	0.048855	immunoglobulin superfamily, member 6 (IGSF6), mRNA.	DORA
ILMN_1721868	NM_002266.2	KPNA2	3838	KPNA2	-2.53191	0.45541	0.152626	0.138562	7.15482e-08	2.1215e-06	-1.50621	0.437115	0.304354	0.289861	0.000672023	0.0202602	karyopherin alpha 2 (RAG cohort 1, importin alpha 1) (KPNA2), mRNA. XM_001133262 XM_001133265 XM_001133267 XM_001133271	RCH1; IPOA1; SRP1alpha; QIP2
ILMN_2399896	NM_014933.2	SEC31A	22872	SEC31A	-2.24875	0.404643	0.152548	0.138482	7.23731e-08	2.1406e-06	-1.20582	0.398145	0.296813	0.282163	0.00272532	0.0529762	SEC31 homolog A (S. cerevisiae) (SEC31A), transcript variant 1, mRNA.	KIAA0905; HSPC334; MGC90305; ABP125; SEC31L1; HSPC275; DKFZp686N07171; ABP130
ILMN_1764383	NM_020533.1	MCOLN1	57192	MCOLN1	-1.98849	0.35785	0.152527	0.138461	7.25933e-08	2.14577e-06	-1.15529	0.345397	0.302455	0.287923	0.000955313	0.0257733	mucolipin 1 (MCOLN1), mRNA.	MSTP080; TRPML1; MLIV; MST080; TRP-ML1; ML4; TRPM-L1
ILMN_1676449	NM_004787.1	SLIT2	9353	SLIT2	-1.36159	0.245103	0.152472	0.138405	7.31834e-08	2.16186e-06	-0.711634	0.242606	0.295206	0.280523	0.00367861	0.0648922	slit homolog 2 (Drosophila) (SLIT2), mRNA.	Slit-2; SLIL3; FLJ14420
ILMN_1775944	XM_001126750.1	ABI2	10152	ABI2	-3.43627	0.619048	0.152324	0.138254	7.47923e-08	2.20388e-06	-1.8101	0.611469	0.295656	0.280982	0.00338187	0.0611545	PREDICTED: abl interactor 2 (ABI2), mRNA.
ILMN_1655312	NM_007216.3	HPS5	11234	HPS5	-2.91143	0.524599	0.152286	0.138217	7.52008e-08	2.21454e-06	-1.77355	0.500474	0.30624	0.291787	0.000473998	0.0160928	Hermansky-Pudlak syndrome 5 (HPS5), transcript variant 2, mRNA.	KIAA1017; AIBP63
ILMN_3213925	XR_038228.1	LOC441481	441481	GPX1	-1.11936	0.201794	0.15219	0.138119	7.6266e-08	2.24311e-06	-0.739284	0.188822	0.313769	0.299472	0.00011773	0.00596504	PREDICTED: misc_RNA (LOC441481), miscRNA.
ILMN_1803429	NM_001001391.1	CD44	960	CD44	-1.24017	0.223623	0.152148	0.138076	7.67431e-08	2.25294e-06	-0.649043	0.221163	0.295229	0.280546	0.00366273	0.0647087	CD44 molecule (Indian blood group) (CD44), transcript variant 4, mRNA.	LHR; CDW44; ECMR-III; MGC10468; MDU2; CSPG8; Pgp1; IN; MUTCH-I; MIC4; MDU3; MC56; HCELL
ILMN_2390853	NM_004390.2	CTSH	1512	CTSH	-0.757429	0.136698	0.151978	0.137903	7.8675e-08	2.30536e-06	-0.441729	0.131733	0.302611	0.288082	0.000928122	0.0253433	cathepsin H (CTSH), transcript variant 1, mRNA.	CPSB; ACC-4; MGC1519; minichain; ACC-5; DKFZp686B24257
ILMN_1763452	NM_006495.3	EVI2B	2124	EVI2B	-0.735829	0.132804	0.151972	0.137897	7.87446e-08	2.30597e-06	-0.424127	0.128339	0.301714	0.287167	0.00109598	0.0284018	ecotropic viral integration site 2B (EVI2B), mRNA.	EVDB; D17S376
ILMN_2148913	NM_018004.1	TMEM45A	55076	TMEM45A	-1.91113	0.344989	0.151936	0.13786	7.91646e-08	2.3154e-06	-1.41499	0.314363	0.326771	0.312745	1.05441e-05	0.00104002	transmembrane protein 45A (TMEM45A), mRNA.	DERP7; FLJ10134
ILMN_1763207	NM_018664.1	BATF3	55509	BATF3	-4.60858	0.83212	0.15189	0.137814	7.96937e-08	2.32656e-06	-3.17111	0.771017	0.318007	0.303799	5.37064e-05	0.00341856	basic leucine zipper transcription factor, ATF-like 3 (BATF3), mRNA.	JUNDM1; SNFT; BATF3
ILMN_1709451	NM_013342.2	TFPT	29844	TFPT	-3.3779	0.609966	0.151872	0.137796	7.9902e-08	2.33121e-06	-2.05004	0.582179	0.305804	0.291342	0.0005138	0.0168865	TCF3 (E2A) fusion partner (in childhood Leukemia) (TFPT), mRNA.	FB1; amida
ILMN_1680996	XM_001127464.1	ALOX5	240	ALOX5	-0.763436	0.137891	0.151826	0.137748	8.04461e-08	2.34419e-06	-0.394054	0.136746	0.294353	0.279653	0.00431431	0.0714929	PREDICTED: arachidonate 5-lipoxygenase (ALOX5), mRNA.
ILMN_1696622	NM_153811.1	SLC38A6	145389	SLC38A6	-1.57831	0.2851	0.151808	0.13773	8.06595e-08	2.34896e-06	-0.815109	0.282687	0.294383	0.279682	0.00429083	0.0713288	solute carrier family 38, member 6 (SLC38A6), mRNA.	NAT-1; MGC102697
ILMN_2230892	NM_000628.3	IL10RB	3588	IL10RB	-1.95565	0.353298	0.151788	0.13771	8.08906e-08	2.35279e-06	-1.18643	0.337203	0.305748	0.291285	0.000519129	0.0169805	interleukin 10 receptor, beta (IL10RB), mRNA.	IL-10R2; CRF2-4; CRFB4; CDW210B; D21S58; D21S66
ILMN_1766487	NM_145256.2	LRRC25	126364	LRRC25	-3.52475	0.637129	0.151678	0.137598	8.22033e-08	2.38804e-06	-1.8153	0.632012	0.2942	0.279496	0.00444018	0.0729377	leucine rich repeat containing 25 (LRRC25), mRNA.	MAPA; FLJ38116
ILMN_2235137	NM_001018115.1	FANCD2	2177	FANCD2	-3.72899	0.674668	0.151503	0.13742	8.43452e-08	2.43977e-06	-2.37157	0.636581	0.30985	0.295472	0.00024308	0.00986207	Fanconi anemia, complementation group D2 (FANCD2), transcript variant 2, mRNA.	FACD; FA-D2; FA4; FANCD; DKFZp762A223; FLJ23826; FAD2; FAD
ILMN_1658383	NM_002155.3	HSPA6	3310		-3.81082	0.689606	0.151466	0.137382	8.48052e-08	2.45158e-06	-2.00695	0.680301	0.295486	0.280808	0.00349116	0.0624134	heat shock 70kDa protein 6 (HSP70B') (HSPA6), mRNA.
ILMN_1660533	NM_002950.3	RPN1	6184	RPN1	-2.134	0.386524	0.151291	0.137204	8.70016e-08	2.50764e-06	-1.21686	0.374165	0.300754	0.286187	0.00130962	0.0322927	ribophorin I (RPN1), mRNA.	DKFZp686B16177; OST1; RBPH1
ILMN_1794740	NM_001039490.1	CD151	977	CD151	-1.33651	0.242078	0.15129	0.137204	8.70097e-08	2.50764e-06	-0.791873	0.232224	0.303675	0.289168	0.000762105	0.022194	CD151 molecule (Raph blood group) (CD151), transcript variant 5, mRNA.	TSPAN24; MER2; GP27; SFA1; PETA-3; RAPH
ILMN_2324421	NM_182743.1	TXNRD1	7296	TXNRD1	-1.84194	0.333774	0.151204	0.137116	8.81116e-08	2.5358e-06	-1.12605	0.317794	0.306232	0.291778	0.000474699	0.016105	thioredoxin reductase 1 (TXNRD1), transcript variant 4, mRNA.	TXNR; GRIM-12; MGC9145; TRXR1; TR; TR1
ILMN_1651964	NM_001023587.1	ABCC5	10057	ABCC5	-2.02662	0.367417	0.151113	0.137024	8.92936e-08	2.5672e-06	-1.06629	0.362343	0.295364	0.280684	0.00357165	0.0635233	ATP-binding cassette, sub-family C (CFTR/MRP), member 5 (ABCC5), transcript variant 2, mRNA.	MOAT-C; pABC11; ABC33; MRP5; SMRP; EST277145; DKFZp686C1782; MOATC
ILMN_1769810	NM_006407.3	ARL6IP5	10550	ARL6IP5	-1.66153	0.301532	0.15092	0.136828	9.18472e-08	2.63422e-06	-1.00884	0.287474	0.305572	0.291105	0.000536334	0.0173617	ADP-ribosylation-like factor 6 interacting protein 5 (ARL6IP5), mRNA.	JWA; DERP11; addicsin; jmx; PRAF3; HSPC127; GTRAP3-18; hp22
ILMN_2374383	NM_130465.3	TSPAN17	26262	TSPAN17	-3.76015	0.682426	0.15091	0.136817	9.19837e-08	2.63494e-06	-2.50183	0.636815	0.314052	0.299761	0.000111725	0.00572863	tetraspanin 17 (TSPAN17), transcript variant 2, mRNA.	FBX23; MGC14859; TM4SF17; MGC71255; FBXO23
ILMN_1789405	NM_152906.3	C22orf25	128989	C22orf25	-2.41582	0.438436	0.150914	0.136821	9.19365e-08	2.63494e-06	-1.29795	0.430159	0.296621	0.281968	0.00282444	0.0542342	chromosome 22 open reading frame 25 (C22orf25), mRNA.	DKFZp761P1121
ILMN_1677997	NM_001042539.1	MAZ	4150	MAZ	-3.13038	0.56834	0.150839	0.136745	9.29439e-08	2.65869e-06	-1.70908	0.555474	0.297643	0.28301	0.00233511	0.0478439	MYC-associated zinc finger protein (purine-binding transcription factor) (MAZ), transcript variant 2, mRNA.	Pur-1; ZNF801; ZF87; PUR1; SAF-2; SAF-1; Zif87
ILMN_1665243	NM_017946.2	FKBP14	55033	FKBP14	-1.96133	0.356098	0.150836	0.136742	9.29817e-08	2.65869e-06	-1.27956	0.333801	0.312058	0.297726	0.000161571	0.00737978	FK506 binding protein 14, 22 kDa (FKBP14), mRNA.	FLJ20731; FKBP22
ILMN_1687978	NM_007350.3	PHLDA1	22822	PHLDA1	-1.27927	0.232291	0.150813	0.136719	9.32978e-08	2.66451e-06	-0.701879	0.226764	0.297962	0.283336	0.00220032	0.045868	pleckstrin homology-like domain, family A, member 1 (PHLDA1), mRNA.	DT1P1B11; PHRIP; TDAG51; MGC131738
ILMN_2086095	NM_002166.4	ID2	3398	ID2	-1.06714	0.193839	0.150747	0.136652	9.42028e-08	2.68549e-06	-0.397313	0.205535	0.281131	0.266155	0.0544046	0.327455	inhibitor of DNA binding 2, dominant negative helix-loop-helix protein (ID2), mRNA.	GIG8; MGC26389; ID2A; ID2H
ILMN_3236928	NM_014017.2	ROBLD3	28956	LAMTOR2	-2.24743	0.408372	0.150683	0.136587	9.50908e-08	2.70591e-06	-1.68222	0.371015	0.32754	0.313531	9.13632e-06	0.000931235	roadblock domain containing 3 (ROBLD3), mRNA.
ILMN_2371433	NM_000381.1	MID1	4281	MID1	-3.10801	0.564785	0.150669	0.136573	9.52826e-08	2.70811e-06	-1.78689	0.545248	0.301209	0.286651	0.00120353	0.0303733	midline 1 (Opitz/BBB syndrome) (MID1), transcript variant 1, mRNA.	RNF59; OGS1; TRIM18; FXY; OS; XPRF; GBBB1; OSX; BBBG1; ZNFXY
ILMN_1683927	NM_002208.4	ITGAE	3682	ITGAE	-1.69643	0.308272	0.150671	0.136574	9.52622e-08	2.70811e-06	-0.90714	0.302677	0.296276	0.281615	0.00301225	0.0567124	integrin, alpha E (antigen CD103, human mucosal lymphocyte antigen 1; alpha polypeptide) (ITGAE), mRNA.	HUMINAE; CD103; MGC141996
ILMN_2326071	NM_021019.3	MYL6	4637	MYL6	-2.2236	0.404252	0.150584	0.136486	9.64766e-08	2.7404e-06	-1.50975	0.375384	0.316036	0.301787	7.73735e-05	0.0044088	myosin, light chain 6, alkali, smooth muscle and non-muscle (MYL6), transcript variant 1, mRNA.	MLC3NM; MLC1SM; LC17-NM; LC17-GI; ESMLC; LC17B; MLC3SM; LC17A
ILMN_3248910	NR_001458.3	MIR155HG	114614	MIR155HG	-3.38261	0.615034	0.150562	0.136463	9.6797e-08	2.74785e-06	-1.69327	0.612947	0.292437	0.277696	0.00618001	0.090685	MIR155 host gene (non-protein coding) (MIR155HG), non-coding RNA.
ILMN_2375825	NM_001774.2	CD37	951	CD37	-2.15907	0.3927	0.150498	0.136398	9.77001e-08	2.7685e-06	-1.24907	0.378484	0.30163	0.287081	0.00111313	0.028715	CD37 molecule (CD37), transcript variant 1, mRNA.	TSPAN26; GP52-40; MGC120234
ILMN_2353633	NM_152916.1	EMR2	30817	EMR2	-1.16704	0.212394	0.150384	0.136282	9.93471e-08	2.8118e-06	-0.624729	0.2084	0.296288	0.281627	0.00300576	0.0566578	egf-like module containing, mucin-like, hormone receptor-like 2 (EMR2), transcript variant 2, mRNA.	CD312; DKFZp781B135
ILMN_3190972	XR_038455.1	LOC100130291	100130291	DSTNP2	-2.99404	0.545068	0.150324	0.136222	1.00217e-07	2.83472e-06	-1.3518	0.555446	0.287522	0.272678	0.0156753	0.163412	PREDICTED: misc_RNA (LOC100130291), miscRNA.
ILMN_1731184	NM_014791.2	MELK	9833	MELK	-3.46562	0.631276	0.150217	0.136113	1.01796e-07	2.87424e-06	-2.02702	0.606666	0.302389	0.287855	0.000967148	0.0260184	maternal embryonic leucine zipper kinase (MELK), mRNA.	KIAA0175; HPK38
ILMN_1675266	NM_016256.2	NAGPA	51172	NAGPA	-2.49626	0.454704	0.150217	0.136113	1.01796e-07	2.87424e-06	-1.2855	0.450008	0.293945	0.279236	0.00465709	0.0750417	N-acetylglucosamine-1-phosphodiester alpha-N-acetylglucosaminidase (NAGPA), mRNA.	UCE; APAA
ILMN_1737163	NM_031286.3	SH3BGRL3	83442	SH3BGRL3	-0.911761	0.166228	0.15005	0.135943	1.04311e-07	2.93298e-06	-0.5353	0.159576	0.302635	0.288107	0.00092392	0.0252577	SH3 domain binding glutamic acid-rich protein like 3 (SH3BGRL3), mRNA.	TIP-B1; SH3BP-1
ILMN_2312340	NM_001080978.1	LILRB2	10288	LILRB2	-1.12795	0.205765	0.149937	0.135828	1.06056e-07	2.97497e-06	-0.599107	0.202124	0.29572	0.281047	0.00334182	0.060741	leukocyte immunoglobulin-like receptor, subfamily B (with TM and ITIM domains), member 2 (LILRB2), transcript variant 2, mRNA.	ILT4; LIR2; LIR-2; MIR10; CD85D; MIR-10
ILMN_1738491	NM_001012994.1	SNX30	401548	SNX30	-3.06919	0.560142	0.149854	0.135744	1.07347e-07	3.00407e-06	-1.76103	0.540474	0.300865	0.2863	0.00128292	0.0318375	sorting nexin family member 30 (SNX30), mRNA.	FLJ35589; FLJ46877; FLJ45069; FLJ26481; FLJ44686; FLJ34280
ILMN_1753064	NM_024525.2	TTC13	79573	TTC13	-4.20249	0.767118	0.149819	0.135708	1.07899e-07	3.01322e-06	-2.22551	0.753922	0.295516	0.28084	0.00347131	0.0622571	tetratricopeptide repeat domain 13 (TTC13), mRNA.	FLJ22584
ILMN_1702806	NM_024065.3	PDCL3	79031	PDCL3	-2.44332	0.445999	0.149819	0.135709	1.07889e-07	3.01322e-06	-1.29412	0.43831	0.295526	0.28085	0.00346473	0.0621626	phosducin-like 3 (PDCL3), mRNA.	VIAF1; HTPHLP; MGC3062
ILMN_1706687	NM_001007075.1	KLHL5	51088	KLHL5	-1.2743	0.232597	0.149828	0.135718	1.07748e-07	3.01322e-06	-0.699209	0.22675	0.297761	0.283131	0.0022843	0.0470529	kelch-like 5 (Drosophila) (KLHL5), transcript variant 3, mRNA.
ILMN_1738642	NM_016308.1	CMPK1	51727	CMPK1	-1.41852	0.258944	0.149812	0.135701	1.08002e-07	3.01347e-06	-0.536692	0.273093	0.281501	0.266532	0.0505407	0.315049	cytidine monophosphate (UMP-CMP) kinase 1, cytosolic (CMPK1), mRNA.	RP11-511I2.1; UMK; UMP-CMPK; CMPK; CMK; UMPK
ILMN_1773388	NM_025113.1	C13orf18	80183	KIAA0226L	-3.02267	0.551871	0.149779	0.135668	1.08522e-07	3.02264e-06	-1.62598	0.540411	0.296475	0.281819	0.00290246	0.055239	chromosome 13 open reading frame 18 (C13orf18), mRNA.	FLJ43762; FLJ21562
ILMN_1855430	XM_001134053.1	LOC199800	199800	C19orf76	-2.4437	0.446144	0.149787	0.135676	1.08396e-07	3.02264e-06	-1.08577	0.455689	0.286809	0.271951	0.0179653	0.177751	PREDICTED: hypothetical protein LOC199800 (LOC199800), mRNA.
ILMN_1714158	NM_000305.2	PON2	5445	PON2	-1.59996	0.292115	0.149781	0.135669	1.08502e-07	3.02264e-06	-0.814079	0.289682	0.293197	0.278472	0.00535868	0.0824709	paraoxonase 2 (PON2), transcript variant 1, mRNA.
ILMN_1709101	NM_144767.3	AKAP13	11214	AKAP13	-2.61063	0.476888	0.149682	0.135569	1.10082e-07	3.05888e-06	-1.21643	0.482087	0.288805	0.273989	0.0122743	0.139498	A kinase (PRKA) anchor protein 13 (AKAP13), transcript variant 3, mRNA.	HA-3; FLJ11952; BRX; FLJ43341; c-lbc; PROTO-LB; Ht31; LBC; AKAP-Lbc; PROTO-LBC
ILMN_1771026	NM_002047.2	GARS	2617	GARS	-1.42852	0.261018	0.149633	0.135519	1.10872e-07	3.07902e-06	-0.832003	0.250916	0.301919	0.287376	0.00105515	0.0277388	glycyl-tRNA synthetase (GARS), mRNA.	SMAD1; DSMAV; GlyRS; CMT2D; HMN5
ILMN_1801504	NM_001754.3	RUNX1	861	RUNX1	-2.39106	0.437297	0.149459	0.135342	1.13721e-07	3.1563e-06	-1.44268	0.416874	0.304639	0.290152	0.000637513	0.0196037	runt-related transcription factor 1 (acute myeloid leukemia 1; aml1 oncogene) (RUNX1), transcript variant 1, mRNA.	AMLCR1; PEBP2aB; EVI-1; CBFA2; AML1; AML1-EVI-1
ILMN_2395236	NM_007194.3	CHEK2	11200	CHEK2	-3.8633	0.706701	0.14942	0.135303	1.14373e-07	3.17253e-06	-2.29402	0.676157	0.30335	0.288837	0.000809273	0.0230982	CHK2 checkpoint homolog (S. pombe) (CHEK2), transcript variant 1, mRNA.	HuCds1; CHK2; LFS2; RAD53; CDS1; PP1425
ILMN_1796537	NM_001465.3	FYB	2533	FYB	-0.773701	0.141562	0.149378	0.13526	1.15076e-07	3.1883e-06	-0.43064	0.137468	0.298618	0.284006	0.00194756	0.0418293	FYN binding protein (FYB-120/130) (FYB), transcript variant 1, mRNA.	PRO0823; SLAP-130; ADAP
ILMN_1681984	NM_017540.3	GALNT10	55568	GALNT10	-2.81572	0.515346	0.149319	0.1352	1.16072e-07	3.21373e-06	-1.2669	0.524485	0.287266	0.272417	0.0164608	0.168287	UDP-N-acetyl-alpha-D-galactosamine:polypeptide N-acetylgalactosaminyltransferase 10 (GalNAc-T10) (GALNT10), transcript variant 2, mRNA.	GalNAcT10; FLJ00205; FLJ11715; pp-GalNAc-T10; DKFZp586H0623
ILMN_1746618	NM_178422.4	PAQR7	164091	PAQR7	-3.6097	0.661169	0.149177	0.135055	1.18517e-07	3.27785e-06	-2.04775	0.639086	0.299888	0.285302	0.00153813	0.0360299	progestin and adipoQ receptor family member VII (PAQR7), mRNA.	MPRA; mSR
ILMN_1704286	NM_144779.1	FXYD5	53827	FXYD5	-1.37572	0.252305	0.148938	0.134812	1.22722e-07	3.38625e-06	-0.710699	0.249019	0.293902	0.279192	0.00469448	0.0754146	FXYD domain containing ion transport regulator 5 (FXYD5), transcript variant 1, mRNA.	dysad; OIT2; PRO6241; HSPC113; RIC; IWU1; KCT1; IWU-1
ILMN_1778242	NM_006888.3	CALM1	801	CALM1	-1.47868	0.271226	0.148911	0.134785	1.23198e-07	3.3974e-06	-0.898424	0.257996	0.305052	0.290574	0.000590533	0.0185572	calmodulin 1 (phosphorylase kinase, delta) (CALM1), mRNA.	PHKD; CALML2; CAMI; DD132
ILMN_1780349	NM_003292.2	TPR	7175	PRG4	-0.416948	0.076511	0.148831	0.134704	1.24642e-07	3.4332e-06	-0.226937	0.074622	0.297028	0.282383	0.00261833	0.0516032	translocated promoter region (to activated MET oncogene) (TPR), mRNA.
ILMN_3284114	XR_018212.1	LOC399748	399748	CAP1	-1.77408	0.325606	0.148798	0.134671	1.25244e-07	3.44378e-06	-0.868168	0.325155	0.290999	0.276228	0.008103	0.107496	PREDICTED: misc_RNA (LOC399748), miscRNA.
ILMN_1786789	NM_001010883.1	FAM102B	284611	FAM102B	-2.22298	0.408417	0.148606	0.134475	1.2882e-07	3.53798e-06	-0.828542	0.430622	0.281029	0.26605	0.0555296	0.330425	family with sequence similarity 102, member B (FAM102B), mRNA.	DKFZp686N01110; DKFZp779B126
ILMN_2342638	NM_080914.1	ASGR2	433	ASGR2	-3.36543	0.618504	0.148548	0.134416	1.2991e-07	3.56378e-06	-2.14669	0.581642	0.309149	0.294756	0.00027674	0.0108274	asialoglycoprotein receptor 2 (ASGR2), transcript variant 3, mRNA.	L-H2; CLEC4H2; Hs.1259; ASGP-R
ILMN_2388605	NM_001005386.1	ACTR2	10097	ACTR2	-1.81177	0.333009	0.148527	0.134394	1.30312e-07	3.57006e-06	-0.871345	0.333641	0.290113	0.275323	0.00957931	0.11998	ARP2 actin-related protein 2 homolog (yeast) (ACTR2), transcript variant 1, mRNA.	ARP2
ILMN_1743357	NM_003399.5	XPNPEP2	7512	XPNPEP2	-3.03611	0.558555	0.148357	0.134222	1.33582e-07	3.6476e-06	-2.02063	0.520178	0.313124	0.298814	0.000132661	0.00648885	X-prolyl aminopeptidase (aminopeptidase P) 2, membrane-bound (XPNPEP2), mRNA.
ILMN_1738116	NM_181724.1	TMEM119	338773	TMEM119	-1.15494	0.212635	0.148217	0.13408	1.36336e-07	3.7185e-06	-0.6178	0.208014	0.29582	0.281149	0.00328022	0.0599438	transmembrane protein 119 (TMEM119), mRNA.
ILMN_3307868	NM_001276.2	CHI3L1	1116	CHI3L1	-0.842192	0.155077	0.14819	0.134052	1.3687e-07	3.73091e-06	-0.504554	0.147873	0.303715	0.289209	0.00075649	0.0220985	chitinase 3-like 1 (cartilage glycoprotein-39) (CHI3L1), mRNA.	DKFZp686N19119; FLJ38139; YYL-40; HCGP-3P; HC-gp39; YKL40; GP39
ILMN_1694731	NM_001287.3	CLCN7	1186	CLCN7	-1.51235	0.278602	0.148108	0.133968	1.38532e-07	3.76753e-06	-0.850465	0.269466	0.299032	0.284428	0.00180337	0.0397246	chloride channel 7 (CLCN7), mRNA.	CLC-7; FLJ39644; OPTA2; FLJ46423; CLC7; FLJ26686
ILMN_1698225	NM_000259.2	MYO5A	4644	MYO5A	-1.9291	0.35545	0.148068	0.133928	1.39331e-07	3.7849e-06	-0.987037	0.351087	0.293215	0.27849	0.00534065	0.0822471	myosin VA (heavy chain 12, myoxin) (MYO5A), mRNA.	MYR12; myosin Va; MYH12; myosin V; GS1; MYO5; MYOXIN
ILMN_1693333	NM_018279.3	TMEM19	55266	TMEM19	-3.66	0.674622	0.148002	0.133861	1.40691e-07	3.81527e-06	-1.87563	0.66604	0.29329	0.278567	0.00526542	0.0815531	transmembrane protein 19 (TMEM19), mRNA.	FLJ10936
ILMN_2038777	NM_001101.2	ACTB	60	ACTB	-1.12358	0.207343	0.147786	0.133642	1.4518e-07	3.92576e-06	-0.628233	0.200719	0.298569	0.283956	0.00196516	0.0421497	actin, beta (ACTB), mRNA.	PS1TP5BP1; beta-actin
ILMN_1815261	NM_004911.3	PDIA4	9601	PDIA4	-4.10396	0.758012	0.14762	0.133473	1.48741e-07	4.00602e-06	-2.57138	0.715112	0.307259	0.292827	0.000392564	0.0140438	protein disulfide isomerase family A, member 4 (PDIA4), mRNA.	ERP72; ERP70
ILMN_2382500	NM_001079692.1	MS4A14	84689	MS4A14	-3.80325	0.703179	0.147434	0.133283	1.52843e-07	4.10015e-06	-2.0542	0.685655	0.296258	0.281596	0.00302264	0.0568428	membrane-spanning 4-domains, subfamily A, member 14 (MS4A14), transcript variant 2, mRNA.	MGC49828; MGC104289; MS4A14
ILMN_1653180	NM_003290.1	TPM4	7171	TPM4	-1.75323	0.324197	0.14741	0.133259	1.53383e-07	4.11229e-06	-1.01646	0.311157	0.301018	0.286456	0.00124709	0.0312559	tropomyosin 4 (TPM4), mRNA.
ILMN_1782098	NM_005631.3	SMO	6608	SMO	-4.07859	0.755119	0.147182	0.133027	1.58568e-07	4.2441e-06	-2.55362	0.712207	0.307057	0.29262	0.000407522	0.0144154	smoothened homolog (Drosophila) (SMO), mRNA.	Gx; SMOH
ILMN_1713892	NM_174921.1	C4orf34	201895	C4orf34	-1.86559	0.345515	0.14712	0.132964	1.59999e-07	4.27819e-06	-0.933758	0.342386	0.291883	0.277131	0.00685894	0.0963716	chromosome 4 open reading frame 34 (C4orf34), mRNA.	FLJ13289
ILMN_2376723	NM_078487.2	CDKN2B	1030	CDKN2B	-0.710226	0.131538	0.147119	0.132963	1.60023e-07	4.27819e-06	-0.35151	0.13066	0.29131	0.276546	0.00764099	0.10383	cyclin-dependent kinase inhibitor 2B (p15, inhibits CDK4) (CDKN2B), transcript variant 2, mRNA.	TP15; p15INK4b; INK4B; P15; MTS2; CDK4I
ILMN_1723035	NM_002543.3	OLR1	4973	OLR1	-1.85589	0.343914	0.147016	0.132859	1.62444e-07	4.33313e-06	-1.21128	0.321342	0.310744	0.296385	0.000206023	0.00872305	oxidized low density lipoprotein (lectin-like) receptor 1 (OLR1), mRNA.	SCARE1; LOX1; CLEC8A
ILMN_1660793	NM_152341.2	PAQR4	124222	PAQR4	-2.7855	0.516228	0.146998	0.132841	1.62865e-07	4.34191e-06	-1.81633	0.482438	0.310651	0.29629	0.000209587	0.00882652	progestin and adipoQ receptor family member IV (PAQR4), mRNA.	FLJ30002
ILMN_1748651	NM_002795.2	PSMB3	5691	PSMB3	-2.02468	0.375317	0.146955	0.132797	1.63899e-07	4.36658e-06	-1.17405	0.360013	0.300917	0.286352	0.00127071	0.0316135	proteasome (prosome, macropain) subunit, beta type, 3 (PSMB3), mRNA.	HC10-II; MGC4147
ILMN_1775762	NM_002070.2	GNAI2	2771	GNAI2	-1.49716	0.277534	0.146952	0.132793	1.63975e-07	4.36658e-06	-0.876234	0.265668	0.301594	0.287044	0.00112059	0.0288498	guanine nucleotide binding protein (G protein), alpha inhibiting activity polypeptide 2 (GNAI2), transcript variant 1, mRNA.	H_LUCA16.1; GIP; GNAI2B; H_LUCA15.1
ILMN_1795158	NM_005248.2	FGR	2268	FGR	-0.653807	0.121218	0.146922	0.132763	1.64679e-07	4.38039e-06	-0.352535	0.118156	0.296049	0.281384	0.00314256	0.0584044	Gardner-Rasheed feline sarcoma viral (v-fgr) oncogene homolog (FGR), transcript variant 1, mRNA.	p58c-fgr; SRC2; c-fgr; FLJ43153; MGC75096; c-src2; p55c-fgr
ILMN_1679809	NM_000852.2	GSTP1	2950	GSTP1	-1.80266	0.334522	0.146756	0.132594	1.68722e-07	4.46782e-06	-1.14756	0.314227	0.308373	0.293964	0.000319419	0.0119894	glutathione S-transferase pi (GSTP1), mRNA.	DFN7; GST3; PI; FAEES3
ILMN_1671116	NM_152531.3	C3orf21	152002	XXYLT1	-2.10323	0.390403	0.146707	0.132545	1.69923e-07	4.49459e-06	-0.966173	0.393608	0.287818	0.272981	0.0148129	0.157135	chromosome 3 open reading frame 21 (C3orf21), mRNA.	FLJ35155
ILMN_2368318	NM_001042729.1	FGR	2268	FGR	-0.587012	0.109005	0.146635	0.132471	1.71729e-07	4.53983e-06	-0.317058	0.106169	0.296095	0.28143	0.00311583	0.0580844	Gardner-Rasheed feline sarcoma viral (v-fgr) oncogene homolog (FGR), transcript variant 3, mRNA.	p58c-fgr; SRC2; c-fgr; FLJ43153; MGC75096; c-src2; p55c-fgr
ILMN_1796245	NM_001375.2	DNASE2	1777	DNASE2	-1.43167	0.265868	0.146624	0.13246	1.71998e-07	4.5444e-06	-0.896473	0.250623	0.306889	0.292449	0.00042033	0.0147471	deoxyribonuclease II, lysosomal (DNASE2), mRNA.	DNASE2A; DNL; DNL2
ILMN_1662741	NM_004720.4	EDG4	9170	LPAR2	-1.37374	0.25518	0.146574	0.132409	1.73267e-07	4.57537e-06	-0.81105	0.243693	0.302146	0.287608	0.00101159	0.026999	endothelial differentiation, lysophosphatidic acid G-protein-coupled receptor, 4 (EDG4), mRNA.	LPAR2; EDG-4; LPA2
ILMN_1686116	NM_003246.2	THBS1	7057	THBS1	-0.511712	0.0950617	0.146558	0.132393	1.73658e-07	4.58313e-06	-0.296537	0.091156	0.30077	0.286203	0.00130576	0.0322381	thrombospondin 1 (THBS1), mRNA.	TSP; THBS; TSP1
ILMN_1666594	NM_002163.2	IRF8	3394	IRF8	-0.686666	0.127718	0.146336	0.132167	1.79385e-07	4.71847e-06	-0.458264	0.118691	0.312633	0.298313	0.000145262	0.00689761	interferon regulatory factor 8 (IRF8), mRNA.	H-ICSBP; ICSBP; IRF-8; ICSBP1
ILMN_1674038	NM_001909.3	CTSD	1509	CTSD	-0.83538	0.155385	0.146329	0.13216	1.79566e-07	4.72063e-06	-0.508464	0.147354	0.304446	0.289955	0.00066066	0.0200331	cathepsin D (CTSD), mRNA.	CLN10; MGC2311; CPSD
ILMN_1664761	NM_016464.3	TMEM138	51524	TMEM138	-1.69969	0.316495	0.14613	0.131958	1.84836e-07	4.84838e-06	-0.956297	0.305314	0.298609	0.283997	0.00195069	0.0418773	transmembrane protein 138 (TMEM138), mRNA.	HSPC196
ILMN_1815552	NM_173474.2	NTAN1	123803	NTAN1	-1.90942	0.355699	0.146053	0.131879	1.86933e-07	4.89525e-06	-0.916611	0.354956	0.289675	0.274876	0.0104074	0.126078	N-terminal asparagine amidase (NTAN1), mRNA.	DKFZp666E058
ILMN_2406299	NM_001005914.1	SEMA3B	7869	SEMA3B	-2.17279	0.404852	0.146011	0.131837	1.88067e-07	4.91677e-06	-1.23598	0.389553	0.299328	0.284731	0.00170672	0.0383822	sema domain, immunoglobulin domain (Ig), short basic domain, secreted, (semaphorin) 3B (SEMA3B), transcript variant 2, mRNA.	FLJ34863; SEMAA; SEMA5; semaV; SemA; LUCA-1
ILMN_1667948	NM_145263.2	SPATA18	132671	SPATA18	-1.64257	0.30635	0.145837	0.13166	1.92891e-07	5.02472e-06	-0.829135	0.302399	0.292112	0.277365	0.00656939	0.0940354	spermatogenesis associated 18 homolog (rat) (SPATA18), mRNA.	FLJ32906
ILMN_1660880	NM_203385.1	RNH1	6050	RNH1	-1.82868	0.341092	0.14582	0.131643	1.93364e-07	5.03022e-06	-0.971481	0.333031	0.294937	0.280248	0.00386816	0.0670112	ribonuclease/angiogenin inhibitor 1 (RNH1), transcript variant 4, mRNA.	MGC54054; RAI; MGC4569; MGC18200; RNH
ILMN_1733288	NM_016546.1	C1RL	51279	C1RL	-1.64469	0.306873	0.145762	0.131584	1.9502e-07	5.06775e-06	-0.787879	0.306208	0.289537	0.274735	0.0106836	0.128046	complement component 1, r subcomponent-like (C1RL), mRNA.	CLSPa; C1RL1; C1r-LP; C1RLP
ILMN_1807283	NM_001543.3	NDST1	3340	NDST1	-2.11427	0.39456	0.145729	0.13155	1.9595e-07	5.08631e-06	-1.2023	0.379545	0.299238	0.284639	0.00173555	0.0388429	N-deacetylase/N-sulfotransferase (heparan glucosaminyl) 1 (NDST1), mRNA.	HSST; NST1
ILMN_1788874	NM_001085.4	SERPINA3	12	SERPINA3	-1.03685	0.193582	0.145647	0.131467	1.9832e-07	5.13373e-06	-0.756959	0.176408	0.321957	0.307831	2.58146e-05	0.00197233	serpin peptidase inhibitor, clade A (alpha-1 antiproteinase, antitrypsin), member 3 (SERPINA3), mRNA.	GIG24; GIG25; AACT; MGC88254; ACT
ILMN_2361862	NM_001018056.1	VLDLR	7436	VLDLR	-0.635723	0.118705	0.145626	0.131445	1.98924e-07	5.14657e-06	-0.323473	0.116936	0.292496	0.277756	0.00611209	0.0899674	very low density lipoprotein receptor (VLDLR), transcript variant 2, mRNA.	FLJ35024; VLDLRCH
ILMN_1716276	NM_207007.2	CCL4L2	388372		-1.92667	0.360251	0.145376	0.131191	2.06302e-07	5.31708e-06	-1.09279	0.346586	0.298977	0.284372	0.00182186	0.0399088	chemokine (C-C motif) ligand 4-like 2 (CCL4L2), mRNA.	AT744.2; SCYA4L; CCL4L
ILMN_1784948	NM_144569.4	SPOCD1	90853	SPOCD1	-1.15539	0.216056	0.145359	0.131174	2.06802e-07	5.32706e-06	-0.682024	0.206059	0.301808	0.287262	0.00107706	0.0280653	SPOC domain containing 1 (SPOCD1), mRNA.	FLJ39908; FLJ25348; RP11-84A19.1
ILMN_2216838	NR_002186.1	DKFZP586I1420	222161	DKFZP586I1420	-3.35682	0.627906	0.145305	0.13112	2.08426e-07	5.36157e-06	-2.16158	0.587597	0.308907	0.294509	0.000289418	0.0112103	hypothetical protein DKFZp586I1420 (DKFZP586I1420), non-coding RNA.
ILMN_2375599	NM_203385.1	RNH1	6050	RNH1	-1.93882	0.362667	0.145303	0.131118	2.08482e-07	5.36157e-06	-1.08832	0.349665	0.298263	0.283644	0.00208029	0.0441189	ribonuclease/angiogenin inhibitor 1 (RNH1), transcript variant 4, mRNA.	MGC54054; RAI; MGC4569; MGC18200; RNH
ILMN_1655821	NM_001747.2	CAPG	822	CAPG	-1.94675	0.364382	0.145188	0.131	2.12016e-07	5.44358e-06	-1.10887	0.350159	0.29922	0.284621	0.00174125	0.038863	capping protein (actin filament), gelsolin-like (CAPG), mRNA.	AFCP; MCP
ILMN_1752988	NM_182901.2	C11orf17	56672	AKIP1	-1.93707	0.362799	0.145075	0.130885	2.15546e-07	5.52823e-06	-1.13596	0.346398	0.301248	0.286691	0.00119485	0.0302026	chromosome 11 open reading frame 17 (C11orf17), transcript variant 1, mRNA.	BCA3; AKIP1
ILMN_1751164	NM_001025598.1	ARHGAP30	257106	ARHGAP30	-3.66097	0.686105	0.14496	0.130769	2.1916e-07	5.61482e-06	-2.4543	0.636349	0.312547	0.298225	0.000147601	0.0069667	Rho GTPase activating protein 30 (ARHGAP30), transcript variant 1, mRNA.	FLJ00267; RP11-544M22.6; FLJ44128
ILMN_1719433	NM_001766.3	CD1D	912	CD1D	-1.71979	0.32244	0.144886	0.130693	2.21555e-07	5.6731e-06	-1.00929	0.307748	0.301253	0.286696	0.00119381	0.0301926	CD1d molecule (CD1D), mRNA.	R3; MGC34622; CD1A
ILMN_1755937	NM_001002857.1	ANXA2	302	ANXA2	-1.42595	0.267364	0.144875	0.130682	2.2189e-07	5.67862e-06	-0.985998	0.246334	0.315625	0.301367	8.35038e-05	0.00462293	annexin A2 (ANXA2), transcript variant 2, mRNA.	P36; LPC2D; ANX2L4; ANX2; PAP-IV; CAL1H; LIP2; LPC2
ILMN_1789266	NM_018246.2	CCDC25	55246	CCDC25	-2.19703	0.412057	0.144824	0.13063	2.2356e-07	5.71515e-06	-1.3396	0.390018	0.304143	0.289646	0.000698732	0.0208097	coiled-coil domain containing 25 (CCDC25), mRNA.	FLJ10853
ILMN_2082314	NM_005488.1	TOM1	10043	TOM1	-1.73604	0.325597	0.144824	0.13063	2.23554e-07	5.71515e-06	-1.09727	0.305797	0.30711	0.292675	0.000403489	0.0143161	target of myb1 (chicken) (TOM1), mRNA.	FLJ33404
ILMN_2352131	NM_004448.2	ERBB2	2064	ERBB2	-1.88117	0.352842	0.144811	0.130617	2.23965e-07	5.72241e-06	-1.30105	0.325062	0.31562	0.301362	8.35751e-05	0.00462293	v-erb-b2 erythroblastic leukemia viral oncogene homolog 2, neuro/glioblastoma derived oncogene homolog (avian) (ERBB2), transcript variant 1, mRNA.	c-erb B2; CD340; HER2; NGL; NEU; HER-2/neu; HER-2; TKR1
ILMN_3251341	NM_032704.3	TUBA1C	84790	TUBA1C	-0.929265	0.17453	0.144572	0.130374	2.31909e-07	5.90943e-06	-0.476545	0.171367	0.292728	0.277993	0.00585198	0.0876249	tubulin, alpha 1c (TUBA1C), mRNA.	MGC14580; TUBA6; bcm948; MGC10851
ILMN_1803819	NM_003870.3	IQGAP1	8826	IQGAP1	-1.41714	0.266284	0.144487	0.130287	2.34795e-07	5.97331e-06	-0.781132	0.257473	0.296903	0.282255	0.00268017	0.0525086	IQ motif containing GTPase activating protein 1 (IQGAP1), mRNA.	HUMORFA01; SAR1; KIAA0051; p195
ILMN_2245305	NM_001042472.1	ABHD12	26090	ABHD12	-2.51736	0.47306	0.144471	0.130272	2.35325e-07	5.98358e-06	-1.6243	0.442191	0.308799	0.294399	0.000295243	0.011343	abhydrolase domain containing 12 (ABHD12), transcript variant 1, mRNA.	DKFZP434P106; dJ965G21.2; C20orf22; ABHD12A; BEM46L2
ILMN_2333865	NM_017626.3	DNAJB12	54788	DNAJB12	-3.78637	0.711711	0.144426	0.130226	2.36874e-07	6.01649e-06	-2.57504	0.657843	0.313751	0.299454	0.00011813	0.00596884	DnaJ (Hsp40) homolog, subfamily B, member 12 (DNAJB12), transcript variant 2, mRNA.	DJ10; DKFZp586B2023
ILMN_1708006	NM_005931.2	MICB	4277	MICB	-3.64938	0.686286	0.144341	0.13014	2.39817e-07	6.08798e-06	-2.09796	0.65752	0.299647	0.285056	0.00160852	0.0372361	MHC class I polypeptide-related sequence B (MICB), mRNA.	PERB11.2
ILMN_3201115	XR_015812.2	LOC440043	440043	PGAM1	-2.14554	0.403516	0.144325	0.130123	2.4037e-07	6.09875e-06	-1.44632	0.373645	0.312838	0.298523	0.000139848	0.00672835	PREDICTED: misc_RNA (LOC440043), miscRNA.
ILMN_3245559	NM_004642.2	CDK2AP1	8099	CDK2AP1	-1.83818	0.34574	0.14431	0.130108	2.40903e-07	6.10572e-06	-0.964099	0.337749	0.29391	0.2792	0.00468758	0.0753523	cyclin-dependent kinase 2 associated protein 1 (CDK2AP1), mRNA.	ST19; doc-1; p12DOC-1; DORC1; DOC1
ILMN_2343278	NM_176895.1	PPAP2A	8611	PPAP2A	-1.0701	0.201315	0.144273	0.13007	2.42197e-07	6.12866e-06	-0.534016	0.198694	0.291269	0.276504	0.00769962	0.10431	phosphatidic acid phosphatase type 2A (PPAP2A), transcript variant 2, mRNA.	PAP2a2; LLP1a; PAP-2a; LPP1; PAP2alpha2; PAP2; PAPalpha1
ILMN_1724052	XR_015766.1	LOC730051	730051	ZNF814	-3.12266	0.58758	0.144235	0.130032	2.43547e-07	6.15623e-06	-1.98372	0.550961	0.307351	0.292921	0.0003859	0.0138627	PREDICTED: similar to Zinc finger protein 418 (LOC730051), mRNA.
ILMN_1672295	NM_025079.1	ZC3H12A	80149	ZC3H12A	-3.72977	0.701882	0.144219	0.130015	2.44121e-07	6.16686e-06	-2.02082	0.680895	0.295784	0.281113	0.00330196	0.0602481	zinc finger CCCH-type containing 12A (ZC3H12A), mRNA.	MCPIP; FLJ23231; dJ423B22.1; RP3-423B22.1
ILMN_1707804	NM_003166.3	SULT1A3	6818		-1.71482	0.322706	0.144216	0.130012	2.44228e-07	6.16686e-06	-0.848677	0.319017	0.29085	0.276076	0.0083338	0.109481	sulfotransferase family, cytosolic, 1A, phenol-preferring, member 3 (SULT1A3), transcript variant 1, mRNA.	MGC117469; HAST3; STM; TL-PST; SULT1A4; HAST; ST1A5; M-PST
ILMN_1802458	NM_001040196.1	AGTRAP	57085	AGTRAP	-3.33896	0.62841	0.144198	0.129994	2.44857e-07	6.17943e-06	-1.7746	0.61208	0.294643	0.279948	0.00408661	0.0695474	angiotensin II receptor-associated protein (AGTRAP), transcript variant 4, mRNA.	MGC29646; ATRAP
ILMN_1805344	NM_004396.2	DDX5	1655	DDX5	-1.95816	0.368573	0.14418	0.129976	2.45495e-07	6.18895e-06	-1.02923	0.359823	0.294006	0.279298	0.00460406	0.0744935	DEAD (Asp-Glu-Ala-Asp) box polypeptide 5 (DDX5), mRNA.	HUMP68; DKFZp686J01190; p68; HLR1; G17P1
ILMN_2112744	NR_002829.1	P2RX6P	440799	P2RX6P	-2.92291	0.550229	0.144158	0.129954	2.46281e-07	6.20544e-06	-1.48838	0.540707	0.292282	0.277538	0.00636306	0.092198	purinergic receptor P2X, ligand-gated ion channel, 6 pseudogene (P2RX6P), non-coding RNA.
ILMN_1685005	NM_001065.2	TNFRSF1A	7132	TNFRSF1A	-1.83483	0.345706	0.144	0.129793	2.52015e-07	6.32633e-06	-1.14062	0.325596	0.305453	0.290983	0.000548276	0.0176516	tumor necrosis factor receptor superfamily, member 1A (TNFRSF1A), mRNA.	TNFR1; p60; CD120a; p55-R; TNFR60; TNF-R55; TNFAR; TBP1; TNF-R-I; TNFR55; FPF; TNF-R; p55; MGC19588
ILMN_1653220	NM_004910.1	PITPNM1	9600	PITPNM1	-2.14637	0.404589	0.143918	0.12971	2.55031e-07	6.39186e-06	-1.26581	0.385335	0.301351	0.286796	0.00117232	0.0297879	phosphatidylinositol transfer protein, membrane-associated 1 (PITPNM1), mRNA.	NIR2; PITPNM; RDGBA1; FLJ44997; RDGB1; RDGB; Rd9; DRES9
ILMN_3246054	XM_001716577.1	LOC732415	732415	MMP19	-2.47026	0.465659	0.143912	0.129703	2.5526e-07	6.39422e-06	-1.60743	0.434292	0.309361	0.294972	0.000266097	0.0105382	PREDICTED: similar to MMP-19 (matrix metalloproteinase) (LOC732415), mRNA.
ILMN_1736539	XM_927536.1	ALDH1L2	160428	ALDH1L2	-2.38646	0.450185	0.143784	0.129573	2.6007e-07	6.50781e-06	-1.57806	0.418393	0.310791	0.296432	0.000204246	0.00866333	PREDICTED: aldehyde dehydrogenase 1 family, member L2 (ALDH1L2), mRNA.
ILMN_1752351	NM_013995.1	LAMP2	3920	LAMP2	-1.99347	0.376363	0.143635	0.129422	2.65757e-07	6.64463e-06	-1.09502	0.363768	0.2965	0.281844	0.00288923	0.0550315	lysosomal-associated membrane protein 2 (LAMP2), transcript variant LAMP2B, mRNA.	LAMPB; CD107b; LAMP-2C
ILMN_2141482	NM_002615.4	SERPINF1	5176	SERPINF1	-1.2234	0.230999	0.143617	0.129403	2.66452e-07	6.65694e-06	-0.886159	0.210636	0.320081	0.305916	3.6565e-05	0.00258491	serpin peptidase inhibitor, clade F (alpha-2 antiplasmin, pigment epithelium derived factor), member 1 (SERPINF1), mRNA.	PIG35; PEDF; EPC-1
ILMN_1771179	NM_001915.3	CYB561	1534	CYB561	-2.00888	0.379343	0.143602	0.129388	2.67035e-07	6.66797e-06	-1.18105	0.361405	0.30104	0.286479	0.00124192	0.0311593	cytochrome b-561 (CYB561), transcript variant 1, mRNA.	FRRS2
ILMN_2104877	NM_016308.1	CMPK1	51727	CMPK1	-1.49336	0.282081	0.143548	0.129333	2.69158e-07	6.71744e-06	-0.606627	0.289344	0.283069	0.268133	0.0370795	0.267149	cytidine monophosphate (UMP-CMP) kinase 1, cytosolic (CMPK1), mRNA.	RP11-511I2.1; UMK; UMP-CMPK; CMPK; CMK; UMPK
ILMN_2407389	NM_002510.2	GPNMB	10457	GPNMB	-0.747456	0.141245	0.143474	0.129258	2.72037e-07	6.78019e-06	-0.389322	0.13801	0.293369	0.278647	0.00518855	0.080693	glycoprotein (transmembrane) nmb (GPNMB), transcript variant 2, mRNA.	NMB; HGFIN
ILMN_2103761	NM_007005.3	TLE4	7091	TLE4	-2.24905	0.425143	0.143414	0.129197	2.74443e-07	6.83185e-06	-1.20191	0.413163	0.294804	0.280112	0.00396571	0.0682731	transducin-like enhancer of split 4 (E(sp1) homolog, Drosophila) (TLE4), mRNA.	BCE-1; ESG4; ESG; GRG4; E(spI)
ILMN_1670926	NM_015892.2	CHST15	51363	CHST15	-1.10405	0.208788	0.14334	0.129122	2.77399e-07	6.88316e-06	-0.602242	0.202018	0.296007	0.281341	0.00316734	0.0586975	carbohydrate (N-acetylgalactosamine 4-sulfate 6-O) sulfotransferase 15 (CHST15), mRNA.	DKFZp781H1369; KIAA0598; BRAG; RP11-47G11.1; MGC34346
ILMN_1662426	NM_004069.3	AP2S1	1175	AP2S1	-1.45377	0.274946	0.143325	0.129106	2.78009e-07	6.89468e-06	-0.85516	0.261834	0.301006	0.286443	0.00124987	0.0312924	adaptor-related protein complex 2, sigma 1 subunit (AP2S1), transcript variant AP17, mRNA.	AP17; CLAPS2; AP17-DELTA
ILMN_1752299	NM_016577.3	RAB6B	51560	RAB6B	-2.10895	0.398956	0.143282	0.129063	2.79748e-07	6.93417e-06	-1.31491	0.375262	0.305469	0.291	0.000546665	0.0176117	RAB6B, member RAS oncogene family (RAB6B), mRNA.
ILMN_1735910	NM_182566.1	VMO1	284013	VMO1	-3.88252	0.734738	0.143216	0.128996	2.82439e-07	6.98987e-06	-2.38461	0.693257	0.304238	0.289743	0.000686557	0.0204988	vitelline membrane outer layer 1 homolog (chicken) (VMO1), mRNA.	MGC125880; PRO21055; ERGA6350; MGC125881
ILMN_1810910	NM_001014975.1	CFH	3075	CFH	-0.676312	0.12806	0.143114	0.128892	2.86668e-07	7.08714e-06	-0.299287	0.129172	0.285911	0.271034	0.0213478	0.196835	complement factor H (CFH), transcript variant 2, mRNA.	HUS; MGC88246; HF1; FH; ARMD4; ARMS1; HF; CFHL3; FHL1; HF2
ILMN_1746986	NM_213568.1	SLC39A3	29985	SLC39A3	-4.09362	0.775211	0.143096	0.128874	2.87418e-07	7.10196e-06	-2.43693	0.736198	0.301814	0.287268	0.00107592	0.0280653	solute carrier family 39 (zinc transporter), member 3 (SLC39A3), transcript variant 2, mRNA.	ZIP3
ILMN_1768814	NM_130446.1	KLHL6	89857	KLHL6	-3.16266	0.598972	0.143079	0.128856	2.88138e-07	7.11603e-06	-1.83788	0.571716	0.300076	0.285495	0.0014852	0.0351557	kelch-like 6 (Drosophila) (KLHL6), mRNA.	FLJ00029
ILMN_1693421	NM_002951.2	RPN2	6185	RPN2	-1.52086	0.288053	0.143067	0.128844	2.88623e-07	7.12428e-06	-0.747963	0.284587	0.290363	0.275579	0.00913652	0.116234	ribophorin II (RPN2), mRNA.	RPNII; RIBIIR; RPN-II; SWP1
ILMN_1799856	NM_173614.2	NOMO2	283820		-1.43863	0.272491	0.143059	0.128836	2.8897e-07	7.12913e-06	-0.884466	0.257015	0.304268	0.289774	0.000682733	0.0204393	NODAL modulator 2 (NOMO2), transcript variant 2, mRNA.	Nomo; PM5
ILMN_1667893	NM_022748.10	TNS3	64759	TNS3	-1.17274	0.222384	0.142854	0.128628	2.97687e-07	7.33491e-06	-0.57094	0.220077	0.289853	0.275058	0.0100623	0.123718	tensin 3 (TNS3), mRNA.	TENS1; FLJ13732; TEM6; MGC88434; H_NH049I23.2; FLJ35545; DKFZp686M1045; DKFZp686K12123
ILMN_2066858	NM_006573.3	TNFSF13B	10673	TNFSF13B	-1.20095	0.227793	0.142808	0.128581	2.99688e-07	7.37432e-06	-0.662637	0.219728	0.296593	0.281939	0.00283931	0.0544315	tumor necrosis factor (ligand) superfamily, member 13b (TNFSF13B), transcript variant 1, mRNA.	TNFSF20; CD257; TALL1; delta BAFF; BAFF; ZTNF4; TALL-1; THANK; BLYS
ILMN_1802404	NM_019900.2	ABCC1	4363	ABCC1	-3.36009	0.637366	0.142799	0.128572	3.00085e-07	7.38024e-06	-1.66831	0.628221	0.290778	0.276003	0.00844694	0.110414	ATP-binding cassette, sub-family C (CFTR/MRP), member 1 (ABCC1), transcript variant 5, mRNA.	ABC29; GS-X; ABCC; MRP1; DKFZp781G125; MRP; DKFZp686N04233
ILMN_1737396	NM_005805.3	PSMD14	10213	PSMD14	-1.44927	0.275191	0.142617	0.128387	3.08124e-07	7.55438e-06	-0.83801	0.262805	0.299611	0.28502	0.00161922	0.0373341	proteasome (prosome, macropain) 26S subunit, non-ATPase, 14 (PSMD14), mRNA.	rpn11; PAD1; POH1
ILMN_2194009	NM_005845.2	ABCC4	10257	ABCC4	-3.84859	0.731648	0.142407	0.128173	3.1768e-07	7.77255e-06	-1.95976	0.717049	0.291975	0.277224	0.00674141	0.0954861	ATP-binding cassette, sub-family C (CFTR/MRP), member 4 (ABCC4), mRNA.	MOATB; EST170205; MRP4; MOAT-B
ILMN_1657797	NM_004214.4	FIBP	9158	FIBP	-2.37563	0.451707	0.142375	0.128141	3.19137e-07	7.80014e-06	-1.61212	0.417128	0.312712	0.298394	0.000143148	0.00683153	fibroblast growth factor (acidic) intracellular binding protein (FIBP), transcript variant 2, mRNA.	FGFIBP; FIBP-1
ILMN_1756326	NM_001827.1	CKS2	1164	CKS2	-3.02138	0.57458	0.142348	0.128114	3.20393e-07	7.81065e-06	-1.90008	0.539022	0.305876	0.291416	0.000506973	0.0167436	CDC28 protein kinase regulatory subunit 2 (CKS2), mRNA.	CKSHS2
ILMN_1704253	NM_024294.2	C6orf106	64771	C6orf106	-2.45196	0.466347	0.142328	0.128093	3.21356e-07	7.83008e-06	-1.25382	0.456601	0.292177	0.277431	0.00648978	0.0932628	chromosome 6 open reading frame 106 (C6orf106), transcript variant 1, mRNA.	FP852; FLJ32402; MGC4614; dJ391O22.4; RP3-391O22.4; FLJ22195
ILMN_1653134	NM_153261.4	TMEM188	255919	TMEM188	-2.7629	0.525536	0.142311	0.128076	3.22136e-07	7.84358e-06	-1.65515	0.498018	0.302059	0.287519	0.00102802	0.0272834	transmembrane protein 188 (TMEM188), mRNA.	C16orf69; FLJ38101; DKFZp313D2416
ILMN_1744068	NM_018091.4	ELP3	55140	ELP3	-2.19851	0.418291	0.142265	0.128029	3.24299e-07	7.8896e-06	-1.35254	0.394178	0.304078	0.28958	0.00070721	0.0209961	elongation protein 3 homolog (S. cerevisiae) (ELP3), mRNA.	FLJ10422; KAT9
ILMN_2311761	NM_001002924.1	AP3S1	1176	AP3S1	-1.82616	0.347576	0.142199	0.127962	3.27403e-07	7.95693e-06	-0.900847	0.3427	0.29037	0.275586	0.0091251	0.116136	adaptor-related protein complex 3, sigma 1 subunit (AP3S1), transcript variant 2, mRNA.	CLAPS3; Sigma3A
ILMN_1656011	NM_002922.3	RGS1	5996	RGS1	-0.884092	0.168325	0.142142	0.127904	3.30129e-07	8.01083e-06	-0.528675	0.159543	0.301879	0.287335	0.00106305	0.0278381	regulator of G-protein signaling 1 (RGS1), mRNA.	BL34; IR20; IER1; 1R20
ILMN_2385097	NM_022477.2	NDRG3	57446	NDRG3	-2.50499	0.477607	0.141894	0.127652	3.42245e-07	8.29207e-06	-1.38757	0.459787	0.29663	0.281976	0.00282016	0.0542025	NDRG family member 3 (NDRG3), transcript variant 2, mRNA.	FLJ13556
ILMN_1728799	NM_000507.2	FBP1	2203	FBP1	-0.818038	0.155978	0.141884	0.127642	3.42726e-07	8.29949e-06	-0.547875	0.144377	0.311263	0.296914	0.000187174	0.00813126	fructose-1,6-bisphosphatase 1 (FBP1), mRNA.	FBP
ILMN_1802888	NM_007150.2	ZNF185	7739	ZNF185	-1.84161	0.351475	0.14172	0.127474	3.51024e-07	8.47439e-06	-0.937273	0.344137	0.291826	0.277072	0.00693318	0.0969539	zinc finger protein 185 (LIM domain) (ZNF185), mRNA.
ILMN_3251207	NM_018279.3	TMEM19	55266	TMEM19	-2.15042	0.411061	0.141442	0.127192	3.65439e-07	8.80441e-06	-1.13293	0.399537	0.293604	0.278888	0.0049642	0.0782328	transmembrane protein 19 (TMEM19), mRNA.	FLJ10936
ILMN_1752451	NM_004390.3	CTSH	1512	CTSH	-1.5707	0.300261	0.141433	0.127183	3.65932e-07	8.8118e-06	-0.875366	0.288529	0.296904	0.282256	0.00267971	0.0525086	cathepsin H (CTSH), transcript variant 1, mRNA.	CPSB; ACC-4; MGC1519; minichain; ACC-5; DKFZp686B24257
ILMN_1797189	NM_006301.2	MAP3K12	7786	MAP3K12	-3.18031	0.60827	0.141344	0.127092	3.7069e-07	8.90825e-06	-2.08884	0.565059	0.309268	0.294878	0.000270693	0.0106714	mitogen-activated protein kinase kinase kinase 12 (MAP3K12), mRNA.	DLK; ZPKP1; ZPK; MUK
ILMN_1721093	NM_006284.2	TAF10	6881	TAF10	-2.27865	0.435816	0.141345	0.127093	3.70655e-07	8.90825e-06	-1.51805	0.403684	0.310562	0.296198	0.0002131	0.0089665	TAF10 RNA polymerase II, TATA box binding protein (TBP)-associated factor, 30kDa (TAF10), mRNA.	TAF2H; TAF2A; TAFII30
ILMN_1681239	NM_012335.2	MYO1F	4542	MYO1F	-2.19996	0.420763	0.141346	0.127094	3.70589e-07	8.90825e-06	-1.22362	0.404443	0.296759	0.282108	0.00275283	0.0533139	myosin IF (MYO1F), mRNA.
ILMN_1804277	NM_152594.1	SPRED1	161742	SPRED1	-1.51974	0.290868	0.141223	0.12697	3.77243e-07	9.05652e-06	-0.87431	0.277622	0.298911	0.284305	0.00184431	0.0402329	sprouty-related, EVH1 domain containing 1 (SPRED1), mRNA.	NFLS; FLJ33903
ILMN_1787127	NM_152346.1	SLC43A2	124935	SLC43A2	-1.97898	0.378836	0.14119	0.126936	3.79075e-07	9.09588e-06	-1.02699	0.369196	0.292741	0.278007	0.00583707	0.0874451	solute carrier family 43, member 2 (SLC43A2), mRNA.	FLJ23848; LAT4; MGC34680
ILMN_1726769	NM_018235.1	CNDP2	55748	CNDP2	-1.74424	0.333929	0.141175	0.12692	3.79918e-07	9.11149e-06	-1.19876	0.307329	0.31346	0.299157	0.000124646	0.00622491	CNDP dipeptidase 2 (metallopeptidase M20 family) (CNDP2), mRNA.	FLJ10830; CPGL; CN2; PEPA; HsT2298
ILMN_1738558	NM_170587.1	RGS20	8601	RGS20	-2.21111	0.423355	0.141156	0.126901	3.80953e-07	9.13167e-06	-1.01731	0.422335	0.287172	0.272321	0.0167602	0.170464	regulator of G-protein signaling 20 (RGS20), transcript variant 1, mRNA.	ZGAP1; RGSZ1
ILMN_1667476	NM_002342.1	LTBR	4055	LTBR	-1.47202	0.28187	0.141139	0.126884	3.81881e-07	9.14928e-06	-0.971399	0.261554	0.309616	0.295233	0.000253803	0.010176	lymphotoxin beta receptor (TNFR superfamily, member 3) (LTBR), mRNA.	TNF-R-III; TNFRSF3; TNFR-RP; LT-BETA-R; TNFCR; TNFR2-RP; CD18; D12S370
ILMN_2394381	NM_000086.2	CLN3	1201	CLN3	-4.04994	0.77707	0.140788	0.126527	4.01846e-07	9.58875e-06	-2.30981	0.742622	0.298226	0.283606	0.00209462	0.0442641	ceroid-lipofuscinosis, neuronal 3 (CLN3), transcript variant 2, mRNA.	MGC102840; BTS
ILMN_1709795	NM_002872.3	RAC2	5880	RAC2	-0.521155	0.0999996	0.14078	0.126519	4.02307e-07	9.59007e-06	-0.278959	0.0967975	0.294357	0.279656	0.00431133	0.0714686	ras-related C3 botulinum toxin substrate 2 (rho family, small GTP binding protein Rac2) (RAC2), mRNA.	Gx; EN-7; HSPC022
ILMN_1796976	NM_021209.3	NLRC4	58484	NLRC4	-3.61216	0.693222	0.14075	0.126489	4.04043e-07	9.61691e-06	-2.27384	0.649266	0.305434	0.290964	0.000550217	0.01769	NLR family, CARD domain containing 4 (NLRC4), mRNA.	CLAN1; CLANB; CLANA; IPAF; CLAN; CLR2.1; CLANC; CLAND; CARD12
ILMN_1733511	NM_005895.3	GOLGA3	2802	GOLGA3	-1.65705	0.318024	0.140742	0.126481	4.04502e-07	9.623e-06	-0.540899	0.335755	0.277749	0.262702	0.108496	0.457776	golgi autoantigen, golgin subfamily a, 3 (GOLGA3), mRNA.	GCP170; MEA-2
ILMN_1798123	NM_022821.2	ELOVL1	64834	ELOVL1	-2.35812	0.452614	0.140727	0.126466	4.05383e-07	9.63426e-06	-1.3996	0.429024	0.300937	0.286373	0.00126586	0.0315259	elongation of very long chain fatty acids (FEN1/Elo2, SUR4/Elo3, yeast)-like 1 (ELOVL1), mRNA.	CGI-88; Ssc1
ILMN_1777915	NM_005819.4	STX6	10228	STX6	-2.25711	0.43355	0.140597	0.126333	4.13094e-07	9.80275e-06	-1.25458	0.416399	0.296546	0.28189	0.00286465	0.0547689	syntaxin 6 (STX6), mRNA.
ILMN_1730491	NM_052905.3	FMNL2	114793	FMNL2	-1.69555	0.325693	0.140593	0.126329	4.13338e-07	9.80361e-06	-0.799325	0.323094	0.288094	0.273262	0.0140548	0.151967	formin-like 2 (FMNL2), mRNA.	FLJ37546; FHOD2
ILMN_1807300	NM_000297.2	PKD2	5311	PKD2	-2.06965	0.397563	0.140588	0.126324	4.13634e-07	9.80571e-06	-0.795535	0.409014	0.281268	0.266294	0.052942	0.323782	polycystic kidney disease 2 (autosomal dominant) (PKD2), mRNA.	PC2; PKD4; APKD2; MGC138468; MGC138466
ILMN_2345898	NM_001045557.1	SLA	6503	SLA	-1.09965	0.211258	0.140569	0.126304	4.14823e-07	9.82898e-06	-0.593492	0.204097	0.294785	0.280093	0.00397978	0.0683157	Src-like-adaptor (SLA), transcript variant 2, mRNA.	SLA1; SLAP
ILMN_2312606	NM_002200.3	IRF5	3663	IRF5	-1.92037	0.368938	0.140565	0.1263	4.15068e-07	9.82985e-06	-1.21852	0.34493	0.306024	0.291566	0.000493316	0.0164882	interferon regulatory factor 5 (IRF5), transcript variant 1, mRNA.
ILMN_1671509	NM_002983.1	CCL3	6348	CCL3	-1.69721	0.326111	0.14054	0.126275	4.16539e-07	9.85482e-06	-1.0646	0.305597	0.305078	0.290601	0.000587683	0.0185169	chemokine (C-C motif) ligand 3 (CCL3), mRNA.	SCYA3; MIP-1-alpha; G0S19-1; LD78ALPHA; MIP1A
ILMN_1694213	NM_016274.4	PLEKHO1	51177	PLEKHO1	-1.92602	0.370152	0.140504	0.126238	4.18738e-07	9.88707e-06	-1.2799	0.342827	0.31001	0.295635	0.000236006	0.00967215	pleckstrin homology domain containing, family O member 1 (PLEKHO1), mRNA.	CKIP-1; OC120; RP11-458I7.3
ILMN_2213558	NR_002807.1	TMED10P	286102	TMED10P1	-1.72215	0.331531	0.140211	0.125941	4.36878e-07	1.02744e-05	-0.905824	0.321781	0.293273	0.27855	0.00528216	0.081627	transmembrane emp24-like trafficking protein 10 (yeast) pseudogene (TMED10P), non-coding RNA.	Tmp21-II
ILMN_1669931	NM_020123.2	TM9SF3	56889	TM9SF3	-2.14962	0.413957	0.140155	0.125884	4.40429e-07	1.03424e-05	-1.07254	0.405918	0.290575	0.275796	0.00877716	0.113127	transmembrane 9 superfamily member 3 (TM9SF3), mRNA.	RP11-34E5.1; SMBP; EP70-P-iso
ILMN_2383077	NM_001077516.1	SLC39A7	7922	SLC39A7	-3.2097	0.618119	0.14015	0.125878	4.4079e-07	1.03438e-05	-2.18793	0.569438	0.312244	0.297916	0.00015611	0.00718897	solute carrier family 39 (zinc transporter), member 7 (SLC39A7), transcript variant 2, mRNA.	ZIP7; KE4; D6S115E; RING5; HKE4; D6S2244E; H2-KE4
ILMN_1711516	NM_001690.2	ATP6V1A	523	ATP6V1A	-2.1981	0.423453	0.14009	0.125818	4.44632e-07	1.04204e-05	-1.16331	0.410429	0.293585	0.278868	0.00498265	0.078367	ATPase, H+ transporting, lysosomal 70kDa, V1 subunit A (ATP6V1A), mRNA.	VA68; Vma1; HO68; ATP6V1A1; VPP2; ATP6A1
ILMN_1727315	NM_024820.2	DENND1A	57706	DENND1A	-3.59423	0.692464	0.140077	0.125804	4.45492e-07	1.04354e-05	-1.9716	0.666394	0.295629	0.280954	0.00339929	0.0613377	DENN/MADD domain containing 1A (DENND1A), transcript variant 2, mRNA.	RP11-230L22.3; FLJ38464; KIAA1608; FAM31A
ILMN_1697694	NM_001183.4	ATP6AP1	537	ATP6AP1	-1.44676	0.278934	0.139951	0.125677	4.53662e-07	1.06005e-05	-0.918437	0.260621	0.305857	0.291396	0.000508808	0.0167807	ATPase, H+ transporting, lysosomal accessory protein 1 (ATP6AP1), mRNA.	XAP-3; CF2; 16A; ATP6IP1; ATP6S1; Ac45; MGC129781; XAP3; VATPS1
ILMN_1695962	NM_020246.2	SLC12A9	56996	SLC12A9	-1.52657	0.294369	0.139924	0.125649	4.55444e-07	1.06369e-05	-0.717556	0.291842	0.287876	0.27304	0.0146508	0.155923	solute carrier family 12 (potassium/chloride transporters), member 9 (SLC12A9), mRNA.	FLJ46905; CIP1
ILMN_1691884	NM_003714.2	STC2	8614	STC2	-1.00452	0.193971	0.139684	0.125405	4.71567e-07	1.09863e-05	-0.398621	0.1981	0.282051	0.267094	0.0453139	0.298354	stanniocalcin 2 (STC2), mRNA.	STCRP; STC-2
ILMN_3310351	NR_028372.1	RNU6-15	100302741	LOC644961	-1.18392	0.228767	0.139569	0.125288	4.79538e-07	1.11391e-05	-0.774393	0.212404	0.30825	0.293839	0.000326772	0.0121784	RNA, U6 small nuclear 15 (RNU6-15), small nuclear RNA.
ILMN_1716445	XM_001126211.1	LOC727761	727761	DTYMK	-1.78236	0.344588	0.139476	0.125193	4.86015e-07	1.1273e-05	-0.981769	0.331088	0.29574	0.281068	0.00332906	0.0605789	PREDICTED: similar to Deoxythymidylate kinase (thymidylate kinase), transcript variant 4 (LOC727761), mRNA.
ILMN_1789733	NM_015526.1	CLIP3	25999	CLIP3	-0.694982	0.134442	0.139375	0.12509	4.9321e-07	1.14007e-05	-0.31621	0.133963	0.286502	0.271638	0.0190544	0.184055	CAP-GLY domain containing linker protein 3 (CLIP3), mRNA.	RSNL1; CLIPR-59; CLIPR59; FLJ33413; DKFZp586N1922
ILMN_2334296	NM_173042.2	IL18BP	10068	IL18BP	-1.11133	0.215179	0.139217	0.12493	5.04581e-07	1.16295e-05	-0.636005	0.205123	0.298056	0.283432	0.00216202	0.0453037	interleukin 18 binding protein (IL18BP), transcript variant A, mRNA.	IL18BPa
ILMN_1659544	NM_004177.3	STX3	6809	STX3	-2.02677	0.392518	0.139179	0.124892	5.07355e-07	1.16763e-05	-1.08354	0.379217	0.293956	0.279247	0.00464752	0.0749838	syntaxin 3 (STX3), mRNA.	STX3A
ILMN_1739236	NM_024706.3	ZNF668	79759	ZNF668	-3.08871	0.598806	0.139	0.12471	5.20692e-07	1.196e-05	-1.83914	0.566206	0.300681	0.286112	0.00132748	0.0326308	zinc finger protein 668 (ZNF668), mRNA.	FLJ13479; FLJ14492
ILMN_1721575	NM_020857.2	VPS18	57617	VPS18	-3.03022	0.587551	0.138975	0.124684	5.22574e-07	1.19916e-05	-1.7971	0.555992	0.300393	0.285818	0.0014005	0.0337308	vacuolar protein sorting 18 homolog (S. cerevisiae) (VPS18), mRNA.	KIAA1475; PEP3
ILMN_3200830	XR_038252.1	LOC649553	649553	CCT6P3	-1.52149	0.295195	0.138869	0.124577	5.30657e-07	1.21652e-05	-0.828501	0.284051	0.294931	0.280242	0.00387247	0.0670613	PREDICTED: misc_RNA (LOC649553), miscRNA.
ILMN_1654411	NM_002988.2	CCL18	6362	CCL18	-1.57806	0.306216	0.138844	0.124551	5.32608e-07	1.22041e-05	-1.06433	0.282446	0.31072	0.29636	0.00020694	0.00873279	chemokine (C-C motif) ligand 18 (pulmonary and activation-regulated) (CCL18), mRNA.	AMAC-1; CKb7; PARC; DCCK1; AMAC1; SCYA18; MIP-4; DC-CK1
ILMN_1763487	NM_005214.3	CTLA4	1493	CTLA4	-3.67372	0.712924	0.138831	0.124538	5.33601e-07	1.22209e-05	-2.48762	0.657067	0.311082	0.29673	0.000193534	0.00833606	cytotoxic T-lymphocyte-associated protein 4 (CTLA4), transcript variant 1, mRNA.	CTLA-4; GSE; CD; CELIAC3; IDDM12; CD152
ILMN_2321416	NM_005219.3	DIAPH1	1729	DIAPH1	-1.58076	0.306852	0.138781	0.124487	5.3745e-07	1.22971e-05	-0.611639	0.314069	0.281296	0.266323	0.0526446	0.323016	diaphanous homolog 1 (Drosophila) (DIAPH1), transcript variant 1, mRNA.	LFHL1; hDIA1; DFNA1; FLJ25265; DRF1
ILMN_2380494	NM_001157.2	ANXA11	311	ANXA11	-1.81038	0.351751	0.138624	0.124327	5.49851e-07	1.25505e-05	-0.825471	0.349887	0.286486	0.271621	0.0191139	0.184337	annexin A11 (ANXA11), transcript variant a, mRNA.	CAP50; ANX11
ILMN_2348268	NM_080730.2	IFFO1	25900	IFFO1	-1.68194	0.326802	0.13862	0.124323	5.50163e-07	1.25516e-05	-1.02192	0.307657	0.302025	0.287484	0.00103457	0.0273957	intermediate filament family orphan 1 (IFFO1), transcript variant 2, mRNA.	HOM-TES-103; DKFZP586I2223; MGC117359; FLJ20703
ILMN_1765044	NM_015960.2	CUTC	51076	CUTC	-1.46838	0.285381	0.138575	0.124278	5.53744e-07	1.26211e-05	-0.573539	0.291512	0.281527	0.266558	0.0502812	0.314051	cutC copper transporter homolog (E. coli) (CUTC), mRNA.	RP11-483F11.3; CGI-32
ILMN_1741917	NM_130771.3	OSCAR	126014	OSCAR	-2.48965	0.483883	0.13857	0.124272	5.54176e-07	1.26249e-05	-1.14295	0.48068	0.286741	0.271881	0.0182017	0.17934	osteoclast associated, immunoglobulin-like receptor (OSCAR), transcript variant 3, mRNA.	MGC33613; PIGR3
ILMN_1745573	NM_024525.2	TTC13	79573	TTC13	-2.41443	0.469491	0.138487	0.124188	5.60883e-07	1.27531e-05	-1.47361	0.441537	0.302318	0.287783	0.000979856	0.0263303	tetratricopeptide repeat domain 13 (TTC13), mRNA.	FLJ22584
ILMN_1696933	NM_004895.3	NLRP3	114548	NLRP3	-4.972	0.966957	0.138462	0.124163	5.62865e-07	1.2792e-05	-3.89179	0.866827	0.326505	0.312473	1.10807e-05	0.00106731	NLR family, pyrin domain containing 3 (NLRP3), transcript variant 1, mRNA.	AII/AVP; AGTAVPRL; PYPAF1; C1orf7; FCAS; NALP3; MWS; FCU
ILMN_1699829	NM_001901.1	CTGF	1490	CTGF	-0.521368	0.101409	0.138441	0.124141	5.64648e-07	1.28202e-05	-0.202137	0.103682	0.28132	0.266348	0.0523888	0.322327	connective tissue growth factor (CTGF), mRNA.	CCN2; MGC102839; IGFBP8; NOV2
ILMN_1733675	NM_002436.2	MPP1	4354	MPP1	-1.20712	0.23484	0.138405	0.124105	5.67557e-07	1.28739e-05	-0.682169	0.22421	0.297052	0.282407	0.00260668	0.051517	membrane protein, palmitoylated 1, 55kDa (MPP1), mRNA.	AAG12; EMP55; DXS552; DXS552E; PEMP; MRG1
ILMN_1668417	NM_003387.3	WASPIP	7456	WIPF1	-1.53925	0.299511	0.138373	0.124073	5.70165e-07	1.29268e-05	-0.636951	0.30289	0.283147	0.268213	0.036515	0.264395	Wiskott-Aldrich syndrome protein interacting protein (WASPIP), mRNA.	WIP; PRPL-2
ILMN_1765132	NM_032857.2	LACTB	114294	LACTB	-2.11244	0.411184	0.138315	0.124013	5.75e-07	1.3024e-05	-1.21579	0.391128	0.298193	0.283572	0.00210775	0.0444251	lactamase, beta (LACTB), nuclear gene encoding mitochondrial protein, transcript variant 1, mRNA.	FLJ14902; G24; MRPL56
ILMN_1783996	NM_022774.1	DEM1	64789	DEM1	-3.13618	0.61072	0.138241	0.123938	5.8122e-07	1.3146e-05	-1.76618	0.583358	0.296796	0.282146	0.00273394	0.0530505	defects in morphology 1 homolog (S. cerevisiae) (DEM1), mRNA.	FLJ21144; FLJ13183; FLJ11445
ILMN_2388155	NM_032991.2	CASP3	836	CASP3	-2.39431	0.466274	0.138233	0.12393	5.81858e-07	1.31541e-05	-1.66448	0.427389	0.313334	0.299028	0.000127595	0.00633018	caspase 3, apoptosis-related cysteine peptidase (CASP3), transcript variant beta, mRNA.	CPP32B; SCA-1; CPP32
ILMN_1695485	XM_379665.2	C9orf109	286333	LINC00256A	-4.07314	0.793795	0.138109	0.123804	5.92412e-07	1.33608e-05	-2.20479	0.763958	0.294425	0.279725	0.00425712	0.070993	PREDICTED: chromosome 9 open reading frame 109 (C9orf109), mRNA.
ILMN_1652906	NM_021996.3	GBGT1	26301	GBGT1	-3.11712	0.607513	0.1381	0.123795	5.9318e-07	1.33717e-05	-2.15804	0.557248	0.312877	0.298562	0.00013886	0.0067081	globoside alpha-1,3-N-acetylgalactosaminyltransferase 1 (GBGT1), mRNA.	FS; MGC44848; UNQ2513; RP11-326L24.6; A3GALNT
ILMN_2232854	NM_004460.2	FAP	2191	FAP	-1.47527	0.287732	0.137976	0.123669	6.03893e-07	1.35808e-05	-0.944679	0.267936	0.30589	0.29143	0.000505666	0.0167121	fibroblast activation protein, alpha (FAP), mRNA.	SEPRASE; DPPIV; FAPA; DKFZp686G13158
ILMN_2381697	NM_001017974.1	P4HA2	8974	P4HA2	-2.54486	0.496362	0.13797	0.123662	6.0445e-07	1.35869e-05	-1.84069	0.451469	0.317228	0.303004	6.20453e-05	0.00375449	prolyl 4-hydroxylase, alpha polypeptide II (P4HA2), transcript variant 3, mRNA.	4-PH alpha 2
ILMN_1685781	NM_032490.4	C14orf142	84520	C14orf142	-2.63827	0.514612	0.13796	0.123652	6.05346e-07	1.36006e-05	-1.65587	0.481085	0.304281	0.289787	0.000681187	0.0204158	chromosome 14 open reading frame 142 (C14orf142), mRNA.	MGC133207; MGC104244; PNAS-127
ILMN_2353642	NM_001039457.1	ATP6V0B	533	ATP6V0B	-1.90351	0.371488	0.137871	0.123562	6.13184e-07	1.37403e-05	-1.14586	0.350106	0.301131	0.286571	0.00122125	0.0307223	ATPase, H+ transporting, lysosomal 21kDa, V0 subunit b (ATP6V0B), transcript variant 2, mRNA.	HATPL; ATP6F; VMA16
ILMN_1786176	NM_001774.1	CD37	951	CD37	-1.3024	0.254179	0.137868	0.123559	6.13427e-07	1.37403e-05	-0.777591	0.239934	0.300548	0.285976	0.0013606	0.0332057	CD37 antigen (CD37), mRNA.	TSPAN26; GP52-40; MGC120234
ILMN_1730628	NM_002934.2	RNASE2	6036	RNASE2	-2.17288	0.42415	0.137833	0.123524	6.16514e-07	1.37991e-05	-1.37339	0.395928	0.304793	0.290309	0.000619575	0.019195	ribonuclease, RNase A family, 2 (liver, eosinophil-derived neurotoxin) (RNASE2), mRNA.	EDN; RNS2
ILMN_3246538	XM_001719715.1	LOC100133866	100133866	PDE4DIP	-1.09034	0.212845	0.137827	0.123517	6.17086e-07	1.3804e-05	-0.531764	0.208843	0.289141	0.274332	0.0115151	0.134335	PREDICTED: similar to phosphodiesterase 4D interacting protein (myomegalin) (LOC100133866), mRNA.
ILMN_1686152	NM_015044.3	GGA2	23062	GGA2	-2.03364	0.39734	0.137676	0.123364	6.30725e-07	1.40772e-05	-0.940017	0.393601	0.286886	0.272029	0.0177032	0.176337	golgi associated, gamma adaptin ear containing, ARF binding protein 2 (GGA2), mRNA.	FLJ20966; VEAR; KIAA1080
ILMN_1651229	NM_014652.2	IPO13	9670	IPO13	-2.61143	0.510827	0.137478	0.123163	6.49005e-07	1.44442e-05	-1.58542	0.480443	0.301626	0.287076	0.00111414	0.028715	importin 13 (IPO13), mRNA.	RANBP13; KIAA0724; IMP13; KAP13
ILMN_1682717	NM_003897.3	IER3	8870	IER3	-1.00997	0.197599	0.137447	0.123131	6.51988e-07	1.4497e-05	-0.659662	0.18322	0.307349	0.292919	0.000386037	0.0138627	immediate early response 3 (IER3), mRNA.	IEX-1L; PRG1; IEX1; GLY96; DIF-2; IEX-1; DIF2
ILMN_1657803	NM_001014975.1	CFH	3075	CFH	-0.678169	0.132798	0.137301	0.122982	6.65893e-07	1.47923e-05	-0.295233	0.132854	0.284658	0.269755	0.0271997	0.227276	complement factor H (CFH), transcript variant 2, mRNA.	HUS; MGC88246; HF1; FH; ARMD4; ARMS1; HF; CFHL3; FHL1; HF2
ILMN_2128931	NM_001447.1	FAT2	2196	FAT2	-3.33556	0.653777	0.137143	0.122822	6.81285e-07	1.512e-05	-2.25944	0.601836	0.310434	0.296068	0.000218179	0.00913144	FAT tumor suppressor homolog 2 (Drosophila) (FAT2), mRNA.	CDHF8; MEGF1; HFAT2
ILMN_3235216	NM_174887.2	IFT20	90410	IFT20	-2.57017	0.503954	0.137077	0.122755	6.8776e-07	1.52393e-05	-1.39888	0.483856	0.294509	0.279811	0.0041909	0.0704602	intraflagellar transport 20 homolog (Chlamydomonas) (IFT20), mRNA.
ILMN_1666049	NM_005085.2	NUP214	8021	NUP214	-1.5656	0.306984	0.137076	0.122753	6.8795e-07	1.52393e-05	-0.846804	0.295091	0.294157	0.279452	0.00447594	0.0733236	nucleoporin 214kDa (NUP214), mRNA.	N214; MGC104525; CAIN; D9S46E; CAN
ILMN_1676358	NM_002881.2	RALB	5899	RALB	-1.98587	0.389655	0.136961	0.122637	6.9942e-07	1.54861e-05	-0.867231	0.389357	0.284724	0.269822	0.0268525	0.225548	v-ral simian leukemia viral oncogene homolog B (ras related; GTP binding protein) (RALB), mRNA.
ILMN_1768784	NM_002803.2	PSMC2	5701	PSMC2	-2.2284	0.437331	0.136928	0.122603	7.02817e-07	1.55541e-05	-1.01619	0.433689	0.286266	0.271396	0.0199402	0.189042	proteasome (prosome, macropain) 26S subunit, ATPase, 2 (PSMC2), mRNA.	MGC3004; Nbla10058; MSS1; S7
ILMN_1759097	NM_006818.3	MLLT11	10962	MLLT11	-3.14034	0.616366	0.13691	0.122585	7.04616e-07	1.55866e-05	-1.90861	0.579264	0.301533	0.286982	0.00113341	0.029069	myeloid/lymphoid or mixed-lineage leukemia (trithorax homolog, Drosophila); translocated to, 11 (MLLT11), mRNA.	AF1Q; RP11-316M1.10
ILMN_1746704	NM_030912.2	TRIM8	81603	TRIM8	-1.28467	0.252173	0.136892	0.122567	7.06438e-07	1.56196e-05	-0.733163	0.239878	0.29729	0.28265	0.00249355	0.0499915	tripartite motif-containing 8 (TRIM8), mRNA.	RNF27; GERP
ILMN_1776076	NM_015352.1	POFUT1	23509	POFUT1	-2.04336	0.40168	0.13665	0.122321	7.31573e-07	1.61e-05	-1.31594	0.37323	0.305891	0.291431	0.000505576	0.0167121	protein O-fucosyltransferase 1 (POFUT1), transcript variant 1, mRNA.	O-Fuc-T; O-FUT; FUT12; O-FucT-1; MGC2482; KIAA0180
ILMN_1792495	NM_001620.1	AHNAK	79026		-0.767148	0.150803	0.136652	0.122323	7.3141e-07	1.61e-05	-0.390681	0.146523	0.290942	0.27617	0.00818943	0.108291	AHNAK nucleoprotein (AHNAK), transcript variant 1, mRNA.	MGC5395; AHNAKRS
ILMN_1811765	NM_021599.1	ADAMTS2	9509		-3.20735	0.63091	0.13654	0.122209	7.43324e-07	1.63422e-05	-2.24447	0.576997	0.313237	0.29893	0.000129902	0.00639959	ADAM metallopeptidase with thrombospondin type 1 motif, 2 (ADAMTS2), transcript variant 2, mRNA.	PCINP; ADAMTS-3; hPCPNI; NPI; ADAM-TS2; PCPNI
ILMN_2112493	NM_004394.1	DAP	1611	DAP	-2.64842	0.521012	0.136525	0.122194	7.44917e-07	1.63633e-05	-1.68826	0.485011	0.305024	0.290546	0.000593568	0.0186155	death-associated protein (DAP), mRNA.	MGC99796
ILMN_3236220	NM_004720.5	LPAR2	9170	LPAR2	-1.90427	0.374657	0.136508	0.122176	7.46794e-07	1.63969e-05	-1.06608	0.35754	0.296017	0.28135	0.00316165	0.058661	lysophosphatidic acid receptor 2 (LPAR2), mRNA.
ILMN_2218856	NM_021006.4	CCL3L1	6349		-2.34406	0.461323	0.136458	0.122125	7.5226e-07	1.64939e-05	-1.44667	0.432092	0.302515	0.287984	0.000944699	0.0256178	chemokine (C-C motif) ligand 3-like 1 (CCL3L1), mRNA.	SCYA3L1; LD78BETA; 464.2; SCYA3L; D17S1718; LD78; G0S19-2; MGC104178; MGC12815
ILMN_2365307	NM_001024736.1	CD276	80381	CD276	-1.29008	0.253954	0.136419	0.122085	7.565e-07	1.65715e-05	-0.697595	0.24392	0.293999	0.279291	0.00461048	0.0745719	CD276 molecule (CD276), transcript variant 1, mRNA. XM_945872 XM_945874	B7-H3; B7H3
ILMN_2345353	NM_205840.1	LST1	7940	LST1	-1.22649	0.24151	0.136368	0.122034	7.62077e-07	1.6686e-05	-0.660879	0.232106	0.293794	0.279081	0.00479097	0.0762649	leukocyte specific transcript 1 (LST1), transcript variant 5, mRNA.	D6S49E; LST-1; B144; MGC119007; MGC119006
ILMN_1713496	NM_001042437.1	ST3GAL5	8869	ST3GAL5	-1.57181	0.309631	0.136301	0.121966	7.69462e-07	1.68321e-05	-0.602006	0.315689	0.280835	0.265853	0.0577202	0.336952	ST3 beta-galactoside alpha-2,3-sialyltransferase 5 (ST3GAL5), transcript variant 2, mRNA.	SIAT9; ST3GalV; SIATGM3S
ILMN_1760858	NM_005370.4	RAB8A	4218	RAB8A	-2.02392	0.398775	0.136266	0.12193	7.73402e-07	1.69026e-05	-0.863659	0.399505	0.283883	0.268964	0.0316206	0.244385	RAB8A, member RAS oncogene family (RAB8A), mRNA.	RAB8; MEL
ILMN_3256325	NM_182580.2	CYB561D1	284613	CYB561D1	-2.15636	0.42524	0.136121	0.121782	7.89785e-07	1.7213e-05	-1.12908	0.41074	0.292223	0.277477	0.00643426	0.09286	cytochrome b-561 domain containing 1 (CYB561D1), transcript variant 2, mRNA.
ILMN_1810199	NM_025080.2	ASRGL1	80150	ASRGL1	-3.13513	0.618527	0.136048	0.121708	7.98158e-07	1.73794e-05	-1.76361	0.589409	0.296194	0.281531	0.00305904	0.0574373	asparaginase like 1 (ASRGL1), mRNA.	ALP1; ALP; FLJ22316
ILMN_1749213	NM_022044.2	SDF2L1	23753	SDF2L1	-1.27572	0.251761	0.135998	0.121658	8.03923e-07	1.74888e-05	-0.72001	0.239745	0.296381	0.281722	0.00295396	0.0558594	stromal cell-derived factor 2-like 1 (SDF2L1), mRNA.
ILMN_1747205	NM_130469.2	JDP2	122953	JDP2	-2.34508	0.462847	0.13598	0.121639	8.0601e-07	1.75262e-05	-0.998323	0.463622	0.283776	0.268854	0.032291	0.247329	Jun dimerization protein 2 (JDP2), mRNA.	JUNDM2
ILMN_1709334	NM_006405.5	TM9SF1	10548	TM9SF1	-2.91166	0.574813	0.135939	0.121598	8.1076e-07	1.76214e-05	-2.06944	0.523998	0.314488	0.300207	0.000103052	0.00540927	transmembrane 9 superfamily member 1 (TM9SF1), transcript variant 1, mRNA.	HMP70; MP70
ILMN_1779182	NM_001033504.1	TMEM98	26022	TMEM98	-1.19437	0.235794	0.135936	0.121595	8.11133e-07	1.76214e-05	-0.631789	0.227265	0.292714	0.277978	0.00586741	0.0877466	transmembrane protein 98 (TMEM98), transcript variant 2, mRNA.	DKFZP564K1964
ILMN_2208413	NM_018460.2	ARHGAP15	55843	ARHGAP15	-1.18238	0.233444	0.135923	0.121582	8.12626e-07	1.76457e-05	-0.644239	0.22376	0.294313	0.279611	0.00434742	0.0719409	Rho GTPase activating protein 15 (ARHGAP15), mRNA.	BM046
ILMN_1759933	NM_139249.2	MS4A6E	245802	MS4A6E	-1.07924	0.213124	0.13589	0.121548	8.16558e-07	1.77148e-05	-0.699985	0.197644	0.306199	0.291745	0.000477596	0.0161339	membrane-spanning 4-domains, subfamily A, member 6E (MS4A6E), mRNA.	MGC126832
ILMN_1675210	NM_021723.2	ADAM22	53616	ADAM22	-3.45346	0.682529	0.135756	0.121411	8.32581e-07	1.79964e-05	-1.69429	0.666784	0.289064	0.274253	0.0116848	0.135679	ADAM metallopeptidase domain 22 (ADAM22), transcript variant 1, mRNA.	MDC2; MGC149832
ILMN_1693287	NM_015932.3	POMP	51371	POMP	-1.99609	0.394478	0.135765	0.121421	8.31443e-07	1.79964e-05	-1.11789	0.376097	0.295859	0.281189	0.00325614	0.0596651	proteasome maturation protein (POMP), mRNA.	UMP1; HSPC014; PNAS-110; C13orf12
ILMN_1804822	NM_080725.1	SRXN1	140809	SRXN1	-1.68184	0.33238	0.135761	0.121417	8.31898e-07	1.79964e-05	-1.01068	0.312699	0.300391	0.285816	0.00140101	0.0337308	sulfiredoxin 1 homolog (S. cerevisiae) (SRXN1), mRNA.	Npn3; SRX1; C20orf139; YKL086W; dJ850E9.2
ILMN_2091846	NR_002200.1	FTHL2	2497	FTH1	-1.72416	0.340962	0.135656	0.12131	8.44645e-07	1.82488e-05	-0.9818	0.324017	0.296838	0.282189	0.00271245	0.0528971	ferritin, heavy polypeptide-like 2 (FTHL2) on chromosome 1.
ILMN_1671482	NM_138801.1	GALM	130589	GALM	-1.65643	0.32764	0.13562	0.121273	8.49085e-07	1.8328e-05	-0.936371	0.311772	0.296383	0.281725	0.00295257	0.0558594	galactose mutarotase (aldose 1-epimerase) (GALM), mRNA.	BLOCK 25
ILMN_1674386	NM_002653.3	PITX1	5307	PITX1	-2.74575	0.543244	0.135577	0.121229	8.54367e-07	1.84084e-05	-1.88112	0.498512	0.310827	0.296469	0.000202901	0.0086295	paired-like homeodomain transcription factor 1 (PITX1), mRNA.	POTX; PTX1; BFT
ILMN_1748093	NM_002573.2	PAFAH1B3	5050	PAFAH1B3	-2.29278	0.453637	0.135572	0.121225	8.54935e-07	1.84122e-05	-0.970587	0.45446	0.283554	0.268628	0.0337172	0.253557	platelet-activating factor acetylhydrolase, isoform Ib, gamma subunit 29kDa (PAFAH1B3), mRNA.
ILMN_1764163	XR_017492.1	LOC644330	644330	TPM3	-3.21403	0.63627	0.135479	0.12113	8.66544e-07	1.86283e-05	-1.716	0.61183	0.293108	0.278381	0.00544879	0.0834235	PREDICTED: similar to tropomyosin 3 isoform 2 (LOC644330), mRNA.
ILMN_3209973	XR_037328.1	LOC646044	646044	SSBP4	-2.67429	0.529529	0.135445	0.121096	8.70772e-07	1.87107e-05	-1.65827	0.495078	0.302542	0.288012	0.000940025	0.0255711	PREDICTED: misc_RNA (LOC646044), miscRNA.
ILMN_3308335	NR_004394.1	RNU6-1	26827	LOC644961	-1.12153	0.222183	0.135362	0.121011	8.81265e-07	1.8919e-05	-0.752521	0.204654	0.308874	0.294475	0.000291188	0.0112389	RNA, U6 small nuclear 1 (RNU6-1), small nuclear RNA.	U6
ILMN_2090105	NM_003564.1	TAGLN2	8407	TAGLN2	-0.927695	0.183781	0.135363	0.121012	8.81135e-07	1.8919e-05	-0.473705	0.178143	0.290832	0.276058	0.00836178	0.109728	transgelin 2 (TAGLN2), mRNA.	KIAA0120; HA1756
ILMN_1680390	NM_001491.2	GCNT2	2651	GCNT2	-3.97398	0.787419	0.135331	0.120979	8.8527e-07	1.89964e-05	-2.10313	0.758254	0.292613	0.277876	0.00597881	0.0887228	glucosaminyl (N-acetyl) transferase 2, I-branching enzyme (I blood group) (GCNT2), transcript variant 2, mRNA.	MGC163396; CCAT; GCNT5; bA421M1.1; IGNT; bA360O19.2; NAGCT1; ULG3; GCNT2C; NACGT1; II
ILMN_1704554	XM_937514.1	LOC648470	648470	LOC643733	-1.37245	0.272036	0.135274	0.120922	8.92514e-07	1.91431e-05	-0.63404	0.268384	0.28653	0.271666	0.0189543	0.183394	PREDICTED: similar to Caspase-4 precursor (CASP-4) (ICH-2 protease) (TX protease) (ICE(rel)-II) (LOC648470), mRNA.
ILMN_2185728	NM_003014.2	SFRP4	6424	SFRP4	-2.00385	0.397362	0.135202	0.120848	9.0192e-07	1.93361e-05	-1.23073	0.372097	0.301766	0.287219	0.00108552	0.0281924	secreted frizzled-related protein 4 (SFRP4), mRNA.	FRPHE; MGC26498; FRP-4
ILMN_3237368	XR_017532.2	LOC644132	644132	MAFG	-3.32612	0.659601	0.135193	0.120839	9.03073e-07	1.9352e-05	-2.13124	0.612756	0.304972	0.290492	0.000599398	0.0187362	PREDICTED: misc_RNA (LOC644132), miscRNA.
ILMN_1782538	NM_003380.2	VIM	7431	VIM	-2.89733	0.574589	0.135187	0.120833	9.03853e-07	1.936e-05	-1.81387	0.536114	0.303175	0.288657	0.000836077	0.0235506	vimentin (VIM), mRNA.	FLJ36605
ILMN_2094856	NM_145000.2	RANBP3L	202151	RANBP3L	-1.36973	0.271699	0.135152	0.120797	9.08484e-07	1.9424e-05	-0.709528	0.262599	0.29149	0.27673	0.00738545	0.101331	RAN binding protein 3-like (RANBP3L), mRNA.	FLJ25422
ILMN_3272378	NM_003379.4	EZR	7430	EZR	-1.41099	0.279909	0.135136	0.120782	9.10493e-07	1.94581e-05	-0.850633	0.263015	0.300428	0.285853	0.00139148	0.0336444	ezrin (EZR), transcript variant 1, mRNA.	VIL2; MGC1584; CVL; FLJ26216; DKFZp762H157; CVIL
ILMN_1783276	NM_144573.3	NEXN	91624	NEXN	-0.934684	0.185625	0.134955	0.120597	9.34695e-07	1.99034e-05	-0.509324	0.177703	0.2941	0.279394	0.00452382	0.0737828	nexilin (F actin binding protein) (NEXN), mRNA.	MGC138865; MGC138866; NELIN; MGC104234
ILMN_1666269	NM_001336.2	CTSZ	1522	CTSZ	-1.12936	0.225015	0.134421	0.120055	1.00952e-06	2.13717e-05	-0.682811	0.211174	0.300414	0.285839	0.001395	0.0336952	cathepsin Z (CTSZ), mRNA.	CTSX
ILMN_1697971	NM_006355.2	TRIM38	10475	TRIM38	-2.29007	0.45657	0.134316	0.119948	1.02491e-06	2.1649e-05	-0.93584	0.458869	0.282375	0.267425	0.0425008	0.287723	tripartite motif-containing 38 (TRIM38), mRNA.	RNF15; RORET; MGC8946
ILMN_1718960	NM_198833.1	SERPINB8	5271	SERPINB8	-3.12714	0.623956	0.134185	0.119815	1.04448e-06	2.20524e-05	-1.53911	0.607739	0.28894	0.274127	0.0119633	0.137528	serpin peptidase inhibitor, clade B (ovalbumin), member 8 (SERPINB8), transcript variant 2, mRNA.	CAP2; PI8
ILMN_2176063	NM_000566.2	FCGR1A	2209		-1.97078	0.393338	0.13414	0.119769	1.05133e-06	2.21774e-05	-1.11124	0.373824	0.295864	0.281195	0.00325309	0.0596651	Fc fragment of IgG, high affinity Ia, receptor (CD64) (FCGR1A), mRNA.	IGFR1; CD64A; FCRI; CD64
ILMN_2081682	NM_022733.1	SMAP2	64744	SMAP2	-0.891929	0.178015	0.13414	0.119769	1.0513e-06	2.21774e-05	-0.460174	0.171934	0.291097	0.276329	0.00795321	0.106457	small ArfGAP2 (SMAP2), mRNA.	SMAP1L; RP1-228H13.3
ILMN_2383934	NM_033669.1	ITGB1	3688	ITGB1	-1.23748	0.247231	0.133975	0.119602	1.07658e-06	2.26291e-05	-0.601286	0.241268	0.288355	0.273529	0.0133716	0.147377	integrin, beta 1 (fibronectin receptor, beta polypeptide, antigen CD29 includes MDF2, MSK12) (ITGB1), transcript variant 1C-2, mRNA.	GPIIA; VLAB; MDF2; FNRB; CD29; MSK12
ILMN_1780302	NM_001376.2	DYNC1H1	1778	DYNC1H1	-1.80748	0.36122	0.133926	0.119551	1.08435e-06	2.27723e-05	-1.0701	0.340154	0.298851	0.284244	0.00186479	0.0405673	dynein, cytoplasmic 1, heavy chain 1 (DYNC1H1), mRNA.	DNECL; DNCH1; HL-3; DYHC; Dnchc1; KIAA0325; DNCL; p22; DHC1a; DHC1
ILMN_1691578	NM_138408.2	GTF3C6	112495	GTF3C6	-2.08219	0.416234	0.133881	0.119505	1.0914e-06	2.29102e-05	-1.52075	0.377181	0.316251	0.302007	7.43534e-05	0.00427275	general transcription factor IIIC, polypeptide 6, alpha 35kDa (GTF3C6), mRNA.	C6orf51; TFIIIC35; bA397G5.3
ILMN_1711994	NM_006053.2	TCIRG1	10312	TCIRG1	-1.24151	0.248219	0.133855	0.11948	1.09539e-06	2.29837e-05	-0.536504	0.247019	0.284011	0.269095	0.0308418	0.241615	T-cell, immune regulator 1, ATPase, H+ transporting, lysosomal V0 subunit A3 (TCIRG1), transcript variant 2, mRNA.	ATP6N1C; OPTB1; ATP6V0A3; OC116; a3; Stv1; Atp6i; OC-116kDa; Vph1; TIRC7
ILMN_1761797	NM_000100.2	CSTB	1476	CSTB	-1.11689	0.22331	0.13385	0.119474	1.09621e-06	2.29908e-05	-0.670725	0.209719	0.299781	0.285193	0.00156898	0.0365354	cystatin B (stefin B) (CSTB), mRNA.	PME; CST6; EPM1; STFB
ILMN_1719303	NM_000918.3	P4HB	5034	P4HB	-1.54916	0.309897	0.133767	0.119389	1.10949e-06	2.3259e-05	-0.935363	0.290723	0.300125	0.285544	0.00147194	0.0349468	prolyl 4-hydroxylase, beta polypeptide (P4HB), mRNA.	GIT; DSI; PO4HB; PDIA1; PROHB; PDI; PHDB; ERBA2L; PO4DB
ILMN_1736806	NM_018440.3	PAG1	55824	PAG1	-4.12036	0.824559	0.133705	0.119327	1.11942e-06	2.34487e-05	-2.28642	0.785543	0.29483	0.280139	0.00394625	0.0680153	phosphoprotein associated with glycosphingolipid microdomains 1 (PAG1), mRNA.	CBP; FLJ37858; MGC138364; PAG
ILMN_1707337	NM_018116.2	MSTO1	55154	MSTO1	-1.07107	0.214574	0.133528	0.119147	1.14829e-06	2.40084e-05	-0.516029	0.209559	0.287929	0.273094	0.0145025	0.154897	misato homolog 1 (Drosophila) (MSTO1), mRNA.	LST005; DKFZp686B1757; RP11-29H23.3; FLJ10504; DKFZp686I01261; MST
ILMN_2380946	NM_001418.3	EIF4G2	1982	EIF4G2	-2.04035	0.408808	0.133507	0.119126	1.15181e-06	2.40714e-05	-1.24295	0.382794	0.300661	0.286091	0.0013325	0.0327034	eukaryotic translation initiation factor 4 gamma, 2 (EIF4G2), transcript variant 1, mRNA.	AAG1; NAT1; p97; FLJ41344; DAP5
ILMN_1773079	NM_000090.3	COL3A1	1281	COL3A1	-0.688742	0.138017	0.133485	0.119103	1.15556e-06	2.41392e-05	-0.410623	0.129743	0.299187	0.284587	0.00175194	0.0390278	collagen, type III, alpha 1 (COL3A1), mRNA.	FLJ34534; EDS4A
ILMN_3236637	NM_005028.4	PIP4K2A	5305	PIP4K2A	-1.13041	0.226609	0.133423	0.119039	1.16596e-06	2.4335e-05	-0.581451	0.218764	0.290813	0.276038	0.00839158	0.109937	phosphatidylinositol-5-phosphate 4-kinase, type II, alpha (PIP4K2A), mRNA.	PIP5KII-alpha; PIP5K2A; PIPK; FLJ13267; PIP5KIIA
ILMN_1813374	NM_174983.3	C19orf28	126321	C19orf28	-1.97548	0.396163	0.133363	0.118979	1.17597e-06	2.4533e-05	-1.08055	0.378245	0.293947	0.279238	0.00465539	0.0750416	chromosome 19 open reading frame 28 (C19orf28), transcript variant 3, mRNA.	MGC20700; PP3501
ILMN_1670576	NM_001098631.1	IRF5	3663	IRF5	-3.569	0.715861	0.133333	0.118948	1.18112e-06	2.46296e-05	-2.5528	0.650941	0.313905	0.299612	0.000114796	0.00585042	interferon regulatory factor 5 (IRF5), transcript variant 7, mRNA.
ILMN_1659564	NM_013336.3	SEC61A1	29927	SEC61A1	-1.71768	0.344762	0.133223	0.118837	1.20002e-06	2.49907e-05	-0.972382	0.327077	0.295869	0.2812	0.00324992	0.0596651	Sec61 alpha 1 subunit (S. cerevisiae) (SEC61A1), mRNA.	HSEC61; SEC61A; SEC61
ILMN_2299045	NM_017593.3	BMP2K	55589	BMP2K	-2.85641	0.573342	0.133217	0.11883	1.20106e-06	2.50014e-05	-1.44372	0.555042	0.289955	0.275162	0.00986992	0.122431	BMP2 inducible kinase (BMP2K), transcript variant 2, mRNA.	DKFZp434P0116; BIKE; DKFZp434K0614; HRIHFB2017
ILMN_1809947	NM_152399.2	TMEM155	132332	TMEM155	-3.53271	0.710186	0.132967	0.118576	1.24513e-06	2.58277e-05	-2.14966	0.664794	0.300417	0.285842	0.00139422	0.0336934	transmembrane protein 155 (TMEM155), mRNA.	FLJ30834
ILMN_3238560	NM_032036.2	IFI27L2	83982	IFI27L2	-1.64052	0.329869	0.132932	0.11854	1.2515e-06	2.59371e-05	-0.941939	0.312045	0.296642	0.281989	0.00281348	0.0541403	interferon, alpha-inducible protein 27-like 2 (IFI27L2), mRNA.	TLH29; MGC44913
ILMN_2061043	NM_001778.2	CD48	962	CD48	-0.800329	0.16095	0.132909	0.118517	1.25565e-06	2.60004e-05	-0.455497	0.152492	0.296107	0.281442	0.00310911	0.0580277	CD48 molecule (CD48), mRNA.	BCM1; SLAMF2; MEM-102; BLAST1; hCD48; mCD48; BLAST
ILMN_2338323	NM_004358.3	CDC25B	994	CDC25B	-1.38886	0.279406	0.132851	0.118458	1.26616e-06	2.61951e-05	-0.521117	0.283596	0.280067	0.265068	0.0673681	0.365104	cell division cycle 25 homolog B (S. pombe) (CDC25B), transcript variant 2, mRNA.
ILMN_1732197	NM_002430.2	MN1	4330	MN1	-1.61363	0.324644	0.132841	0.118448	1.26793e-06	2.62202e-05	-1.01529	0.302017	0.302769	0.288244	0.000901247	0.0247962	meningioma (disrupted in balanced translocation) 1 (MN1), mRNA.	MGCR1-PEN; MGCR; MGCR1; dJ353E16.2
ILMN_1741159	NM_005204.2	MAP3K8	1326	MAP3K8	-1.27646	0.256878	0.132798	0.118404	1.27591e-06	2.63622e-05	-0.637209	0.249063	0.289321	0.274515	0.0111299	0.131266	mitogen-activated protein kinase kinase kinase 8 (MAP3K8), mRNA.	TPL2; FLJ10486; EST; COT; c-COT; ESTF; Tpl-2
ILMN_1802557	NM_015987.3	HEBP1	50865	HEBP1	-1.48151	0.298344	0.13269	0.118294	1.29594e-06	2.67292e-05	-0.754959	0.28819	0.290234	0.275447	0.00936285	0.118271	heme binding protein 1 (HEBP1), mRNA.	HBP; HEBP
ILMN_1676719	XR_017492.1	LOC644330	644330	TPM3	-2.57504	0.5188	0.132614	0.118217	1.31021e-06	2.69999e-05	-1.58709	0.484356	0.3012	0.286642	0.00120555	0.0303996	PREDICTED: similar to tropomyosin 3 isoform 2 (LOC644330), mRNA.
ILMN_3251346	NM_016931.3	NOX4	50507	NOX4	-2.08953	0.421013	0.132602	0.118206	1.31235e-06	2.70088e-05	-1.35623	0.389397	0.305064	0.290586	0.000589285	0.0185375	NADPH oxidase 4 (NOX4), transcript variant 1, mRNA.
ILMN_3306997	NM_005371.5	METTL1	4234	METTL1	-1.50739	0.303725	0.132599	0.118203	1.31292e-06	2.70088e-05	-0.876464	0.286559	0.297328	0.282689	0.00247611	0.0498319	methyltransferase like 1 (METTL1), transcript variant 1, mRNA.	FLJ95748; C12orf1; YDL201w; TRM8
ILMN_1804332	NM_020155.2	GPR137	56834	GPR137	-1.86391	0.375596	0.132584	0.118187	1.31583e-06	2.70365e-05	-1.18209	0.348843	0.303273	0.288757	0.000821025	0.0232651	G protein-coupled receptor 137 (GPR137), mRNA.	GPR137A; TM7SF1L1; C11orf4
ILMN_2358069	NM_001013836.1	MAD1L1	8379	MAD1L1	-3.36807	0.678977	0.132518	0.11812	1.32835e-06	2.72551e-05	-1.96309	0.64027	0.297456	0.28282	0.00241755	0.0489742	MAD1 mitotic arrest deficient-like 1 (yeast) (MAD1L1), transcript variant 2, mRNA.	PIG9; HsMAD1; TXBP181; MAD1; TP53I9
ILMN_1669032	NM_000943.4	PPIC	5480	PPIC	-1.44869	0.292174	0.132447	0.118048	1.34202e-06	2.75116e-05	-1.05482	0.264729	0.315237	0.300971	8.97234e-05	0.00487185	peptidylprolyl isomerase C (cyclophilin C) (PPIC), mRNA.	MGC3673; CYPC
ILMN_1721283	NM_144617.1	HSPB6	126393	HSPB6	-0.828382	0.167085	0.132432	0.118032	1.34498e-06	2.75443e-05	-0.589029	0.152021	0.312918	0.298604	0.000137805	0.0066776	heat shock protein, alpha-crystallin-related, B6 (HSPB6), mRNA.	FLJ32389; Hsp20
ILMN_1723414	NM_012260.2	HACL1	26061	HACL1	-1.29554	0.261419	0.132366	0.117965	1.35786e-06	2.77763e-05	-0.823019	0.242681	0.303325	0.288811	0.000813143	0.0231528	2-hydroxyacyl-CoA lyase 1 (HACL1), mRNA.	2-HPCL; HPCL2; HPCL; PHYH2
ILMN_1732810	NM_014748.2	SNX17	9784	SNX17	-2.4465	0.493691	0.132357	0.117956	1.3596e-06	2.77999e-05	-1.61431	0.455182	0.306294	0.291841	0.000469299	0.0159907	sorting nexin 17 (SNX17), mRNA.	KIAA0064
ILMN_1814200	NM_198892.1	BMP2K	55589	BMP2K	-4.39103	0.886173	0.132342	0.117941	1.36259e-06	2.7849e-05	-2.29428	0.851874	0.291355	0.276592	0.00757578	0.103224	BMP2 inducible kinase (BMP2K), transcript variant 1, mRNA.	DKFZp434P0116; DKFZp434K0614; BIKE; HRIHFB2017
ILMN_2306189	NM_006986.3	MAGED1	9500	MAGED1	-1.53141	0.309134	0.132304	0.117902	1.37005e-06	2.79771e-05	-1.00673	0.285201	0.30597	0.291511	0.000498239	0.0165654	melanoma antigen family D, 1 (MAGED1), transcript variant 2, mRNA.	NRAGE; DLXIN-1	D
ILMN_1668247	NM_145867.1	LTC4S	4056	LTC4S	-2.03757	0.411448	0.132249	0.117846	1.3809e-06	2.81865e-05	-1.39104	0.377024	0.309124	0.294731	0.000278	0.0108569	leukotriene C4 synthase (LTC4S), mRNA.	MGC33147
ILMN_1688373	NM_205839.1	LST1	7940	LST1	-1.40586	0.283949	0.132214	0.117811	1.38792e-06	2.83053e-05	-0.79431	0.269169	0.295501	0.280824	0.0034815	0.0623453	leukocyte specific transcript 1 (LST1), transcript variant 4, mRNA.	D6S49E; LST-1; B144; MGC119007; MGC119006
ILMN_2390919	NM_001998.2	FBLN2	2199	FBLN2	-0.853654	0.172416	0.132214	0.117811	1.38785e-06	2.83053e-05	-0.521498	0.161168	0.300456	0.285882	0.00138417	0.0335608	fibulin 2 (FBLN2), transcript variant 2, mRNA.
ILMN_1681890	NM_006520.1	DYNLT3	6990	DYNLT3	-1.91469	0.386891	0.132143	0.117739	1.40218e-06	2.8584e-05	-1.41883	0.349434	0.316866	0.302634	6.63586e-05	0.00393772	dynein, light chain, Tctex-type 3 (DYNLT3), mRNA.	TCTE1L; TCTEX1L; RP3
ILMN_1687306	NM_006498.2	LGALS2	3957	LGALS2	-1.72775	0.349148	0.132129	0.117724	1.40503e-06	2.86174e-05	-1.05882	0.326161	0.300647	0.286077	0.00133589	0.0327676	lectin, galactoside-binding, soluble, 2 (LGALS2), mRNA.	HL14; MGC75071
ILMN_1723684	NM_002036.2	DARC	2532	DARC	-0.680174	0.13745	0.13213	0.117725	1.4048e-06	2.86174e-05	-0.255295	0.139286	0.280017	0.265017	0.0680584	0.367019	Duffy blood group, chemokine receptor (DARC), transcript variant 2, mRNA.	FY; Dfy; WBCQ1; CCBP1; GPD; CD234
ILMN_1740502	NR_002931.1	CLEC4GP1	440508	CLEC4GP1	-1.58465	0.320284	0.132102	0.117697	1.41045e-06	2.8703e-05	-0.944063	0.300711	0.298737	0.284127	0.00190486	0.0412115	C-type lectin domain family 4, member G pseudogene 1 (CLEC4GP1), non-coding RNA.	FLJ33370; FLJ41145; MGC48640; FLJ33415
ILMN_1683859	NM_003045.3	SLC7A1	6541	SLC7A1	-1.6669	0.337195	0.131966	0.117559	1.43836e-06	2.92081e-05	-0.927581	0.320416	0.294571	0.279875	0.00414201	0.0700366	solute carrier family 7 (cationic amino acid transporter, y+ system), member 1 (SLC7A1), mRNA.	CAT-1; REC1L; HCAT1; ATRC1; ERR
ILMN_1747355	NM_021006.4	CCL3L1	6349		-2.09252	0.42333	0.131951	0.117544	1.44139e-06	2.92571e-05	-1.28023	0.395512	0.300477	0.285904	0.00137877	0.0334913	chemokine (C-C motif) ligand 3-like 1 (CCL3L1), mRNA.	SCYA3L1; LD78BETA; 464.2; SCYA3L; D17S1718; LD78; G0S19-2; MGC104178; MGC12815
ILMN_1667356	NM_152994.2	CCDC128	129285	PPP1R21	-2.21476	0.448303	0.131865	0.117456	1.45945e-06	2.96109e-05	-0.823006	0.454676	0.279771	0.264766	0.071532	0.376562	coiled-coil domain containing 128 (CCDC128), mRNA.	MGC111781; FLJ16566
ILMN_1681101	NM_017923.2	MARCH1	55016	MARCH1	-3.49995	0.708866	0.13177	0.11736	1.4795e-06	2.99793e-05	-2.03403	0.668275	0.297072	0.282427	0.00259705	0.0514281	membrane-associated ring finger (C3HC4) 1 (MARCH1), mRNA.	FLJ20668; MARCH-I; DKFZp564M1682; RNF171
ILMN_1789233	NM_017966.4	VPS37C	55048	VPS37C	-2.1114	0.427758	0.131724	0.117313	1.48932e-06	3.01395e-05	-1.15611	0.407515	0.293627	0.278911	0.00494339	0.0779906	vacuolar protein sorting 37 homolog C (S. cerevisiae) (VPS37C), mRNA.	FLJ20847
ILMN_2320888	NM_001008540.1	CXCR4	7852	CXCR4	-1.52171	0.308749	0.131487	0.117072	1.54118e-06	3.10825e-05	-0.929224	0.288436	0.300201	0.285622	0.00145128	0.0345962	chemokine (C-X-C motif) receptor 4 (CXCR4), transcript variant 1, mRNA.	WHIM; NPY3R; NPYY3R; FB22; LAP3; LCR1; NPYR; HM89; HSY3RR; NPYRL; D2S201E; CD184; LESTR
ILMN_1709549	XM_001128220.1	PLEKHM1	9842	PLEKHM1	-2.86539	0.581559	0.131438	0.117022	1.55207e-06	3.12621e-05	-1.80164	0.540455	0.302246	0.28771	0.000993018	0.0265933	PREDICTED: pleckstrin homology domain containing, family M (with RUN domain) member 1 (PLEKHM1), mRNA.
ILMN_1813911	NM_000520.3	HEXA	3073	HEXA	-3.90251	0.792134	0.131421	0.117005	1.55583e-06	3.13246e-05	-1.79289	0.777123	0.285778	0.270899	0.0219021	0.200116	hexosaminidase A (alpha polypeptide) (HEXA), mRNA.	TSD; MGC99608
ILMN_2357438	NM_198434.1	AURKA	6790	AURKA	-4.11777	0.835963	0.131395	0.116979	1.56158e-06	3.14001e-05	-2.67752	0.772231	0.304763	0.290279	0.000622951	0.0192555	aurora kinase A (AURKA), transcript variant 3, mRNA.	STK15; STK7; AURA; AIK; BTAK; AURORA2; ARK1; MGC34538; STK6
ILMN_2255133	NM_022893.2	BCL11A	53335	BCL11A	-2.76215	0.560883	0.131359	0.116942	1.56975e-06	3.1551e-05	-1.5985	0.528931	0.296703	0.282051	0.00278204	0.0538133	B-cell CLL/lymphoma 11A (zinc finger protein) (BCL11A), transcript variant 1, mRNA.	BCL11A-L; CTIP1; FLJ10173; EVI9; BCL11A-XL; BCL11A-S; FLJ34997; KIAA1809
ILMN_2403852	NM_017456.2	CYTH1	9267	CYTH1	-2.16072	0.438791	0.131346	0.116929	1.57262e-06	3.15819e-05	-0.691994	0.45339	0.276956	0.261893	0.12826	0.494977	cytohesin 1 (CYTH1), transcript variant 2, mRNA.	FLJ41900; D17S811E; B2-1; CYTOHESIN-1; FLJ34050; SEC7
ILMN_1749521	NM_018656.2	SLC35E3	55508	SLC35E3	-2.38472	0.484291	0.131343	0.116925	1.57346e-06	3.15854e-05	-1.34172	0.458969	0.29504	0.280354	0.00379413	0.0662138	solute carrier family 35, member E3 (SLC35E3), mRNA.	BLOV1
ILMN_1804854	NM_001903.2	CTNNA1	1495	CTNNA1	-1.94753	0.395623	0.131296	0.116878	1.58411e-06	3.17856e-05	-1.12949	0.37292	0.296816	0.282166	0.0027238	0.0529686	catenin (cadherin-associated protein), alpha 1, 102kDa (CTNNA1), mRNA.	CAP102; FLJ36832
ILMN_1692352	NM_016123.1	IRAK4	51135	IRAK4	-3.99121	0.810872	0.131277	0.116859	1.58834e-06	3.18454e-05	-2.36926	0.761183	0.298266	0.283646	0.00207935	0.0441188	interleukin-1 receptor-associated kinase 4 (IRAK4), mRNA.	NY-REN-64; REN64; IPD1
ILMN_1764109	NM_001733.4	C1R	715	C1R	-1.08717	0.220888	0.131267	0.116849	1.59065e-06	3.18763e-05	-0.652981	0.206919	0.299025	0.284421	0.00180567	0.0397381	complement component 1, r subcomponent (C1R), mRNA.
ILMN_1680154	NM_005909.3	MAP1B	4131	MAP1B	-1.11248	0.226268	0.131101	0.116679	1.62919e-06	3.25797e-05	-0.46772	0.224983	0.282853	0.267912	0.038688	0.273213	microtubule-associated protein 1B (MAP1B), mRNA.	FUTSCH; MAP5; DKFZp686F1345; DKFZp686E1099; FLJ38954
ILMN_1697817	NM_015368.3	PANX1	24145	PANX1	-3.50819	0.713717	0.13106	0.116638	1.63883e-06	3.27171e-05	-1.97474	0.676126	0.294996	0.280309	0.00382559	0.0665702	pannexin 1 (PANX1), mRNA.	MRS1; MGC21309; UNQ2529
ILMN_1737146	NM_014294.4	TRAM1	23471	TRAM1	-2.10243	0.427956	0.130975	0.116551	1.65908e-06	3.30934e-05	-1.1339	0.408403	0.292657	0.277921	0.00592951	0.0883383	translocation associated membrane protein 1 (TRAM1), mRNA.	PNAS-8; TRAMP; TRAM
ILMN_1726682	XM_941435.2	LOC146909	146909	KIF18B	-1.30986	0.266695	0.130933	0.116509	1.66908e-06	3.32789e-05	-0.856506	0.246035	0.305031	0.290553	0.000592796	0.0186155	PREDICTED: hypothetical protein LOC146909, transcript variant 4 (LOC146909), mRNA.
ILMN_2141790	NM_006389.2	HYOU1	10525	HYOU1	-2.63184	0.536004	0.13089	0.116465	1.67933e-06	3.34691e-05	-1.54958	0.50369	0.297637	0.283004	0.00233764	0.04786	hypoxia up-regulated 1 (HYOU1), mRNA.	DKFZp686N08236; ORP150
ILMN_1773865	NM_005347.2	HSPA5	3309	HSPA5	-1.26775	0.258213	0.130878	0.116453	1.68239e-06	3.35159e-05	-0.583285	0.253028	0.285753	0.270873	0.0220085	0.200376	heat shock 70kDa protein 5 (glucose-regulated protein, 78kDa) (HSPA5), mRNA.	BIP; FLJ26106; MIF2; GRP78
ILMN_2394250	NM_021622.3	PLEKHA1	59338	PLEKHA1	-1.79434	0.365514	0.130858	0.116432	1.68729e-06	3.35995e-05	-0.928568	0.351242	0.290597	0.275818	0.00874162	0.112742	pleckstrin homology domain containing, family A (phosphoinositide binding specific) member 1 (PLEKHA1), transcript variant 1, mRNA.	TAPP1
ILMN_1655608	NM_025010.3	KLHL18	23276	KLHL18	-3.93943	0.802517	0.13085	0.116424	1.68923e-06	3.36098e-05	-2.5692	0.740645	0.304794	0.290311	0.000619403	0.019195	kelch-like 18 (Drosophila) (KLHL18), mRNA.	FLJ13703; KIAA0795
ILMN_3271092	NM_001135629.1	KLRAQ1	129285	PPP1R21	-2.08914	0.42558	0.130852	0.116426	1.68864e-06	3.36098e-05	-0.926129	0.419498	0.28447	0.269563	0.028211	0.230872	KLRAQ motif containing 1 (KLRAQ1), transcript variant 1, mRNA.
ILMN_1803423	NM_004840.2	ARHGEF6	9459	ARHGEF6	-1.02734	0.20937	0.130785	0.116358	1.70509e-06	3.3911e-05	-0.619672	0.195893	0.299159	0.284558	0.00176108	0.0391761	Rac/Cdc42 guanine nucleotide exchange factor (GEF) 6 (ARHGEF6), mRNA.	COOL2; PIXA; MRX46; KIAA0006; alpha-PIX; Cool-2; alphaPIX
ILMN_2078466	NM_173543.1	DZIP1L	199221	DZIP1L	-3.50581	0.71476	0.130722	0.116294	1.72053e-06	3.41254e-05	-1.85414	0.684181	0.291615	0.276857	0.00721346	0.0997302	DAZ interacting protein 1-like (DZIP1L), mRNA.	FLJ32844
ILMN_1686388	XR_017492.1	LOC644330	644330	TPM3	-1.82256	0.371559	0.130732	0.116304	1.71819e-06	3.41254e-05	-0.807117	0.366231	0.28442	0.269512	0.0284855	0.231999	PREDICTED: similar to tropomyosin 3 isoform 2 (LOC644330), mRNA.
ILMN_1808707	NM_003088.2	FSCN1	6624	FSCN1	-0.958563	0.195428	0.130724	0.116296	1.72001e-06	3.41254e-05	-0.524323	0.185987	0.293339	0.278617	0.0052172	0.0809787	fascin homolog 1, actin-bundling protein (Strongylocentrotus purpuratus) (FSCN1), mRNA.	FLJ38511; SNL; p55
ILMN_1801864	XM_001125904.1	LOC730455	730455	NTAN1	-1.62067	0.330516	0.130676	0.116248	1.73194e-06	3.43295e-05	-0.832943	0.317902	0.290241	0.275454	0.0093504	0.118145	PREDICTED: similar to N-terminal Asn amidase (LOC730455), mRNA.
ILMN_1803810	NM_001042576.1	RRBP1	6238	RRBP1	-2.93443	0.598593	0.130636	0.116207	1.74188e-06	3.44689e-05	-1.64523	0.567184	0.294666	0.279972	0.004069	0.0693307	ribosome binding protein 1 homolog 180kDa (dog) (RRBP1), transcript variant 1, mRNA.	DKFZp586A1420; MGC157721; ES130; FLJ36146; MGC157720; ES/130; hES
ILMN_1758939	NM_003821.5	RIPK2	8767	RIPK2	-2.42608	0.495049	0.130587	0.116157	1.75428e-06	3.46706e-05	-1.2305	0.47716	0.289623	0.274823	0.010511	0.126919	receptor-interacting serine-threonine kinase 2 (RIPK2), mRNA.	RIP2; GIG30; RICK; CARDIAK; CARD3; CCK
ILMN_1741711	NM_005128.2	DOPEY2	9980	DOPEY2	-2.509	0.51229	0.130488	0.116056	1.77944e-06	3.50946e-05	-1.45382	0.482555	0.296543	0.281887	0.00286618	0.0547689	dopey family member 2 (DOPEY2), mRNA.	C21orf5
ILMN_3248786	XR_018211.2	LOC647588	647588	PDE4DIP	-2.34794	0.479481	0.130463	0.116031	1.7858e-06	3.51906e-05	-1.23686	0.459123	0.291367	0.276604	0.00755953	0.103138	PREDICTED: hypothetical LOC647588 (LOC647588), mRNA.
ILMN_2364376	NM_004517.2	ILK	3611	ILK	-2.06092	0.420904	0.130449	0.116017	1.78939e-06	3.52468e-05	-1.45754	0.382918	0.311503	0.297159	0.000179042	0.00792194	integrin-linked kinase (ILK), transcript variant 1, mRNA.	P59; DKFZp686F1765
ILMN_1766914	NM_002404.1	MFAP4	4239	MFAP4	-0.752372	0.153672	0.130435	0.116003	1.79304e-06	3.52892e-05	-0.489023	0.141865	0.304379	0.289887	0.000668905	0.0202271	microfibrillar-associated protein 4 (MFAP4), mRNA.
ILMN_1685750	NM_138453.2	RAB3C	115827	RAB3C	-2.94996	0.602575	0.130423	0.11599	1.79619e-06	3.53365e-05	-1.04348	0.613328	0.278638	0.26361	0.0901756	0.420738	RAB3C, member RAS oncogene family (RAB3C), mRNA.
ILMN_1683980	NM_015164.1	PLEKHM2	23207	PLEKHM2	-1.63488	0.333964	0.130416	0.115983	1.79796e-06	3.53567e-05	-0.889599	0.317997	0.292993	0.278263	0.00556769	0.0847128	pleckstrin homology domain containing, family M (with RUN domain) member 2 (PLEKHM2), mRNA.	SKIP; RP11-169K16.1; KIAA0842
ILMN_1689088	NM_130386.1	COLEC12	81035	COLEC12	-0.965104	0.197156	0.130408	0.115975	1.80002e-06	3.53824e-05	-0.533435	0.187223	0.293824	0.279112	0.00476366	0.0761124	collectin sub-family member 12 (COLEC12), mRNA.	CLP1; SCARA4; SRCL; NSR2
ILMN_1788547	NM_002061.2	GCLM	2730	GCLM	-1.24776	0.25498	0.130357	0.115923	1.81327e-06	3.56132e-05	-0.794869	0.236204	0.302834	0.28831	0.00089048	0.0245422	glutamate-cysteine ligase, modifier subunit (GCLM), mRNA.	GLCLR
ILMN_1781374	NM_020127.1	TUFT1	7286	TUFT1	-1.0439	0.213343	0.130341	0.115907	1.81742e-06	3.568e-05	-0.656284	0.198086	0.301868	0.287324	0.00106506	0.0278755	tuftelin 1 (TUFT1), mRNA.
ILMN_1751120	NM_003543.3	HIST1H4H	8365	HIST1H4H	-2.10882	0.431737	0.130067	0.115629	1.89055e-06	3.70388e-05	-1.10194	0.413757	0.290895	0.276122	0.00826272	0.108914	histone cluster 1, H4h (HIST1H4H), mRNA.	H4FH; H4/h
ILMN_1781155	NM_002350.1	LYN	4067	LYN	-0.716619	0.146846	0.129925	0.115484	1.92966e-06	3.76801e-05	-0.337528	0.143133	0.286471	0.271606	0.0191694	0.184756	v-yes-1 Yamaguchi sarcoma viral related oncogene homolog (LYN), mRNA.	FLJ26625; JTK8
ILMN_1737813	XM_001132636.1	PRNPIP	79033	ERI3	-2.05424	0.421113	0.129863	0.115421	1.94697e-06	3.79868e-05	-1.26383	0.392314	0.300199	0.285619	0.00145188	0.0345962	PREDICTED: prion protein interacting protein (PRNPIP), mRNA.
ILMN_2115125	NM_001901.2	CTGF	1490	CTGF	-0.567786	0.116449	0.129789	0.115345	1.96784e-06	3.83466e-05	-0.224815	0.116526	0.281088	0.266111	0.0548716	0.328515	connective tissue growth factor (CTGF), mRNA.	CCN2; MGC102839; IGFBP8; NOV2; HCS24
ILMN_1702835	NM_003022.1	SH3BGRL	6451	SH3BGRL	-1.54236	0.31654	0.129685	0.115239	1.99758e-06	3.8846e-05	-0.681619	0.311526	0.284216	0.269304	0.0296345	0.236655	SH3 domain binding glutamic acid-rich protein like (SH3BGRL), mRNA.	MGC117402; SH3BGR
ILMN_1737988	NM_001080121.1	PRNP	5621	PRNP	-1.66834	0.342404	0.12968	0.115235	1.99883e-06	3.88543e-05	-1.05017	0.317674	0.301734	0.287187	0.00109192	0.0283121	prion protein (PRNP), transcript variant 3, mRNA.	CD230; PrP33-35C; ASCR; PrP27-30; GSS; CJD; PRIP; PrPc; PrP; MGC26679
ILMN_1807894	NM_182728.1	SLC7A8	23428	SLC7A8	-2.03015	0.416962	0.129568	0.115121	2.03145e-06	3.94397e-05	-1.35751	0.382801	0.306289	0.291836	0.000469728	0.0159937	solute carrier family 7 (cationic amino acid transporter, y+ system), member 8 (SLC7A8), transcript variant 2, mRNA.	LPI-PC1; LAT2
ILMN_1668559	NM_001005339.1	RGS10	6001	RGS10	-1.50831	0.30991	0.129505	0.115056	2.04996e-06	3.97666e-05	-0.801784	0.29593	0.291605	0.276847	0.00722705	0.099839	regulator of G-protein signaling 10 (RGS10), transcript variant 1, mRNA.
ILMN_1808566	NM_024789.3	TMEM180	79847	TMEM180	-4.29288	0.8824	0.129443	0.114994	2.06826e-06	4.01051e-05	-3.04217	0.802063	0.311226	0.296876	0.000188467	0.0081639	transmembrane protein 180 (TMEM180), mRNA.	FLJ22529; C10orf77; RP11-18I14.8; bA18I14.8
ILMN_3299520	NM_212535.2	PRKCB	5579	PRKCB	-1.17901	0.242379	0.129421	0.114972	2.07469e-06	4.02133e-05	-0.624439	0.231563	0.291408	0.276646	0.00750085	0.102557	protein kinase C, beta (PRKCB), transcript variant 1, mRNA.
ILMN_1678191	NM_004962.2	GDF10	2662	GDF10	-0.957599	0.196917	0.129377	0.114927	2.08792e-06	4.04366e-05	-0.447882	0.191983	0.286127	0.271255	0.0204793	0.191967	growth differentiation factor 10 (GDF10), mRNA.	BMP-3b; BMP3B
ILMN_1761464	NM_001025159.1	CD74	972	CD74	-1.00676	0.207097	0.129323	0.114872	2.10409e-06	4.06997e-05	-0.598086	0.194006	0.297747	0.283117	0.00229019	0.0471333	CD74 molecule, major histocompatibility complex, class II invariant chain (CD74), transcript variant 1, mRNA.	Ia-GAMMA; DHLAG; HLADG; protein 41
ILMN_3223181	NM_001136232.1	SEC13	6396	SEC13	-1.69043	0.347749	0.129317	0.114866	2.10608e-06	4.07215e-05	-1.16944	0.317359	0.309031	0.294636	0.000282811	0.0109994	SEC13 homolog (S. cerevisiae) (SEC13), transcript variant 2, mRNA.
ILMN_2112638	NM_153366.2	SVEP1	79987	SVEP1	-0.688316	0.141621	0.129291	0.114839	2.11393e-06	4.0851e-05	-0.195022	0.147652	0.275207	0.260107	0.18782	0.58266	sushi, von Willebrand factor type A, EGF and pentraxin domain containing 1 (SVEP1), mRNA.	FLJ16013; POLYDOM; CCP22; C9orf13; SEL-OB; FLJ90719
ILMN_1664094	NM_023914.2	P2RY13	53829	P2RY13	-0.971889	0.200014	0.129254	0.114802	2.12523e-06	4.10248e-05	-0.521243	0.190646	0.291991	0.27724	0.00672148	0.0952894	purinergic receptor P2Y, G-protein coupled, 13 (P2RY13), transcript variant 1, mRNA.	P2Y13; FKSG77; SP174; GPR94; GPCR1; GPR86
ILMN_1798543	NM_004226.2	STK17B	9262	STK17B	-1.79181	0.368801	0.129233	0.114781	2.13151e-06	4.11125e-05	-0.866868	0.35754	0.287392	0.272546	0.0160675	0.165952	serine/threonine kinase 17b (STK17B), mRNA.	DRAK2
ILMN_2281502	NM_005771.3	DHRS9	10170	DHRS9	-2.03747	0.41941	0.129217	0.114764	2.13665e-06	4.11735e-05	-1.03723	0.403229	0.289526	0.274725	0.0107049	0.128139	dehydrogenase/reductase (SDR family) member 9 (DHRS9), transcript variant 1, mRNA.	RDHL; 3alpha-HSD; RETSDR8; RDH15
ILMN_1674236	NM_001540.2	HSPB1	3315	HSPB1	-1.35022	0.277935	0.12922	0.114767	2.13558e-06	4.11735e-05	-0.722566	0.265002	0.291874	0.277122	0.00687044	0.0964379	heat shock 27kDa protein 1 (HSPB1), mRNA.	HS.76067; HMN2B; HSP27; Hsp25; HSP28; DKFZp586P1322; CMT2F
ILMN_2320349	NM_138972.2	BACE1	23621	BACE1	-2.49714	0.514081	0.129202	0.114749	2.14115e-06	4.12311e-05	-1.16876	0.501003	0.286126	0.271253	0.0204844	0.191967	beta-site APP-cleaving enzyme 1 (BACE1), transcript variant b, mRNA.	ASP2; KIAA1149; BACE; HSPC104; FLJ90568
ILMN_2405185	NM_001158.3	AOC2	314	AOC2	-3.57409	0.735849	0.12919	0.114736	2.14488e-06	4.12526e-05	-2.09434	0.690866	0.296862	0.282213	0.00270056	0.0528215	amine oxidase, copper containing 2 (retina-specific) (AOC2), transcript variant 1, mRNA.	DAO2; RAO
ILMN_2391150	NM_001042459.1	FILIP1L	11259	FILIP1L	-1.04681	0.215518	0.129192	0.114739	2.14421e-06	4.12526e-05	-0.536313	0.206979	0.289806	0.27501	0.0101516	0.124284	filamin A interacting protein 1-like (FILIP1L), transcript variant 3, mRNA.	DOC-1; GIP90; DOC1
ILMN_1700822	NM_005700.3	DPP3	10072	DPP3	-2.4833	0.511372	0.129159	0.114705	2.15435e-06	4.1401e-05	-1.13569	0.500148	0.285293	0.270403	0.0240516	0.211755	dipeptidyl-peptidase 3 (DPP3), transcript variant 1, mRNA.	FLJ11387; DPPIII; FLJ22331
ILMN_1788098	NM_000233.2	LHCGR	3973	LHCGR	-0.893476	0.183988	0.12916	0.114706	2.15402e-06	4.1401e-05	-0.567612	0.170357	0.302215	0.287678	0.000998715	0.0267308	luteinizing hormone/choriogonadotropin receptor (LHCGR), mRNA.	LHR; LGR2; hLHR; LCGR
ILMN_1760201	NM_001379.1	DNMT1	1786	DNMT1	-1.57454	0.324394	0.129084	0.114629	2.17773e-06	4.18333e-05	-0.628003	0.323809	0.281204	0.266229	0.0536217	0.325669	DNA (cytosine-5-)-methyltransferase 1 (DNMT1), mRNA.	FLJ16293; DNMT; CXXC9; MCMT; MGC104992
ILMN_1801616	NM_001423.1	EMP1	2012	EMP1	-1.05922	0.218246	0.129069	0.114614	2.18242e-06	4.19064e-05	-0.518519	0.211128	0.287837	0.273	0.0147609	0.156736	epithelial membrane protein 1 (EMP1), mRNA.	CL-20; EMP-1; TMP
ILMN_2344204	NM_018457.2	PRR13	54458	PRR13	-1.90265	0.392046	0.129063	0.114608	2.18429e-06	4.19152e-05	-1.11077	0.368267	0.296602	0.281947	0.00283492	0.0543694	proline rich 13 (PRR13), transcript variant 2, mRNA.	FLJ23818; DKFZp564J157; TXR1
ILMN_1785198	NM_017443.3	POLE3	54107	POLE3	-2.31537	0.477166	0.129037	0.114582	2.19237e-06	4.20462e-05	-1.80431	0.426887	0.320516	0.306361	3.37254e-05	0.00243142	polymerase (DNA directed), epsilon 3 (p17 subunit) (POLE3), mRNA.	YBL1; p17; CHRAC17; CHARAC17
ILMN_1786426	NM_024660.2	TMEM149	79713	IGFLR1	-2.02521	0.417872	0.128851	0.114392	2.25195e-06	4.30666e-05	-1.34641	0.38383	0.305543	0.291076	0.000539206	0.0174383	transmembrane protein 149 (TMEM149), mRNA.	U2AF1L4; FLJ22573
ILMN_2081398	NM_004798.2	KIF3B	9371	KIF3B	-2.67267	0.551481	0.128846	0.114387	2.25358e-06	4.30804e-05	-1.51572	0.520472	0.294856	0.280166	0.00392717	0.0677359	kinesin family member 3B (KIF3B), mRNA.	HH0048; KIAA0359
ILMN_1757552	NM_012232.3	PTRF	284119	PTRF	-1.51172	0.312002	0.128811	0.114351	2.26504e-06	4.3247e-05	-0.883881	0.292926	0.296622	0.281968	0.00282404	0.0542342	polymerase I and transcript release factor (PTRF), mRNA.	FKSG13
ILMN_1672611	NM_001797.2	CDH11	1009	CDH11	-1.10086	0.227203	0.128812	0.114353	2.26445e-06	4.3247e-05	-0.447828	0.226029	0.281687	0.266722	0.0487008	0.308994	cadherin 11, type 2, OB-cadherin (osteoblast) (CDH11), mRNA.	CDHOB; CAD11; OB; OSF-4
ILMN_3247587	NM_017842.2	SLC48A1	55652	SLC48A1	-2.14937	0.444026	0.128664	0.114202	2.31319e-06	4.41307e-05	-1.34099	0.412235	0.300768	0.286201	0.0013062	0.0322381	solute carrier family 48 (heme transporter), member 1 (SLC48A1), mRNA.
ILMN_1779875	NM_006288.2	THY1	7070	THY1	-0.644634	0.133325	0.128486	0.114021	2.37328e-06	4.52041e-05	-0.34422	0.127051	0.291605	0.276846	0.00722823	0.099839	Thy-1 cell surface antigen (THY1), mRNA.	CD90; FLJ33325
ILMN_1778064	NM_007076.2	FICD	11153	FICD	-1.92131	0.397415	0.128469	0.114004	2.3791e-06	4.52967e-05	-1.27443	0.365085	0.305215	0.29074	0.000573025	0.0182006	FIC domain containing (FICD), mRNA.	MGC5623; HYPE; UNQ3041; HIP13
ILMN_2079655	NM_002258.2	KLRB1	3820	KLRB1	-0.792028	0.163918	0.128384	0.113917	2.40827e-06	4.57968e-05	-0.353993	0.160679	0.28441	0.269502	0.0285384	0.232266	killer cell lectin-like receptor subfamily B, member 1 (KLRB1), mRNA.	hNKR-P1A; NKR-P1; CLEC5B; CD161; MGC138614; NKRP1A; NKR-P1A; NKR
ILMN_1717599	NM_020872.1	CNTN3	5067	CNTN3	-2.41221	0.499258	0.128375	0.113909	2.41122e-06	4.58211e-05	-1.10894	0.487272	0.285361	0.270472	0.0237394	0.210092	contactin 3 (plasmacytoma associated) (CNTN3), mRNA.	PANG; KIAA1496; PCS; BIG-1
ILMN_1749846	NM_005014.1	OMD	4958	OMD	-1.31134	0.271419	0.12837	0.113903	2.41317e-06	4.58347e-05	-0.650343	0.261746	0.288246	0.273418	0.0136513	0.149174	osteomodulin (OMD), mRNA.	OSAD; SLRR2C
ILMN_1765860	NM_144658.3	DOCK11	139818	DOCK11	-1.25852	0.26064	0.128279	0.113811	2.44477e-06	4.63977e-05	-0.731721	0.244804	0.29614	0.281476	0.00308981	0.0577587	dedicator of cytokinesis 11 (DOCK11), mRNA.	ZIZ2; bB128O4.1; FLJ43653; FLJ32122
ILMN_1741371	NM_021259.1	TMEM8	58986	TMEM8A	-1.94017	0.401937	0.128231	0.113761	2.46194e-06	4.6686e-05	-1.18721	0.374251	0.299317	0.28472	0.00171011	0.03844	transmembrane protein 8 (five membrane-spanning domains) (TMEM8), mRNA.	M83; TMEM6
ILMN_1655913	NM_005013.2	NUCB2	4925	NUCB2	-1.6348	0.338691	0.128224	0.113755	2.46436e-06	4.67131e-05	-0.858478	0.323533	0.290745	0.275969	0.00849959	0.110726	nucleobindin 2 (NUCB2), mRNA.	NEFA
ILMN_1805449	NM_018009.3	TAPBPL	55080	TAPBPL	-3.05588	0.63351	0.128125	0.113654	2.49959e-06	4.73431e-05	-1.8035	0.593429	0.296993	0.282347	0.00263536	0.0518241	TAP binding protein-like (TAPBPL), mRNA.	TAPBP-R; TAPBPR; FLJ10143
ILMN_1692754	NM_030938.2	TMEM49	81671	VMP1	-1.55136	0.321783	0.128043	0.113571	2.52917e-06	4.78268e-05	-0.83457	0.306093	0.291872	0.27712	0.00687278	0.0964379	transmembrane protein 49 (TMEM49), mRNA.	VMP1; DKFZP566I133
ILMN_2224907	NM_174921.1	C4orf34	201895	C4orf34	-1.6347	0.339097	0.12803	0.113557	2.53405e-06	4.78997e-05	-0.70798	0.333771	0.283373	0.268443	0.0349343	0.259085	chromosome 4 open reading frame 34 (C4orf34), mRNA.	FLJ13289
ILMN_1767360	NM_000628.3	IL10RB	3588	IL10RB	-2.00404	0.415984	0.12793	0.113456	2.57071e-06	4.8549e-05	-1.18101	0.389685	0.296848	0.282199	0.00270738	0.0528507	interleukin 10 receptor, beta (IL10RB), mRNA.	IL-10R2; CRF2-4; CRFB4; CDW210B; D21S58; D21S66
ILMN_1811472	NM_004856.4	KIF23	9493	KIF23	-4.96227	1.03033	0.127886	0.113411	2.58696e-06	4.88218e-05	-3.45368	0.938564	0.308928	0.294531	0.000288272	0.011175	kinesin family member 23 (KIF23), transcript variant 2, mRNA.	MKLP-1; CHO1; KNSL5; MKLP1
ILMN_3236156	NM_021227.2	OSTC	58505	OSTC	-1.79802	0.373475	0.127825	0.113349	2.6096e-06	4.91707e-05	-0.886251	0.360232	0.287897	0.273062	0.0145909	0.155559	oligosaccharyltransferase complex subunit (OSTC), mRNA.
ILMN_1776464	NM_006437.3	PARP4	143	PARP4	-1.71537	0.356449	0.127765	0.113288	2.63229e-06	4.94696e-05	-0.944532	0.337656	0.29299	0.278261	0.00557067	0.0847137	poly (ADP-ribose) polymerase family, member 4 (PARP4), mRNA.	p193; PARPL; PH5P; ADPRTL1; VPARP; VAULT3
ILMN_1727055	NM_017915.2	C12orf48	55010	C12orf48	-3.77126	0.784096	0.127679	0.113201	2.66498e-06	5.00348e-05	-2.1377	0.73912	0.294527	0.279829	0.00417659	0.0703163	chromosome 12 open reading frame 48 (C12orf48), mRNA.	FLJ20641
ILMN_2366634	NM_182471.1	PKM2	5315	PKM2	-1.03794	0.215812	0.127672	0.113194	2.66768e-06	5.00656e-05	-0.566519	0.204707	0.292515	0.277776	0.00608995	0.0897014	pyruvate kinase, muscle (PKM2), transcript variant 3, mRNA.	PKM; THBP1; MGC3932; OIP3; PK3; TCB; CTHBP
ILMN_1765621	NM_004494.1	HDGF	3068	HDGF	-2.22227	0.46218	0.127632	0.113153	2.68286e-06	5.03106e-05	-0.990612	0.452648	0.284222	0.26931	0.0295989	0.236583	hepatoma-derived growth factor (high-mobility group protein 1-like) (HDGF), mRNA.	DKFZp686J1764; HMG1L2
ILMN_1758941	NM_005669.4	REEP5	7905	REEP5	-1.5424	0.320815	0.127618	0.113139	2.68849e-06	5.03897e-05	-0.727427	0.311495	0.286159	0.271287	0.020354	0.19144	receptor accessory protein 5 (REEP5), mRNA.	MGC70440; DP1; D5S346; TB2; C5orf18
ILMN_1796749	NM_006612.4	KIF1C	10749	KIF1C	-1.37252	0.285482	0.127616	0.113137	2.68921e-06	5.03897e-05	-0.768361	0.269645	0.29383	0.279118	0.00475877	0.0760856	kinesin family member 1C (KIF1C), mRNA.	LTXS1; KIAA0706
ILMN_1746171	NM_138609.2	H2AFY	9555	H2AFY	-1.50621	0.31341	0.127558	0.113077	2.7118e-06	5.07526e-05	-0.802769	0.298404	0.291309	0.276545	0.00764223	0.10383	H2A histone family, member Y (H2AFY), transcript variant 1, mRNA.	H2A.y; H2A/y; H2AF12M; MACROH2A1.1; mH2A1; macroH2A1.2; H2AFJ
ILMN_3236584	NR_024061.1	LOH12CR2	503693	LOH12CR2	-4.55653	0.948161	0.127551	0.11307	2.71461e-06	5.07851e-05	-3.63208	0.844875	0.322137	0.308014	2.49656e-05	0.00192682	loss of heterozygosity, 12, chromosomal region 2 (LOH12CR2), non-coding RNA.
ILMN_1784294	NM_016352.2	CPA4	51200	CPA4	-2.64475	0.550734	0.127442	0.112959	2.75743e-06	5.15251e-05	-1.74913	0.505825	0.304586	0.290099	0.000643711	0.0196713	carboxypeptidase A4 (CPA4), mRNA.	CPA3
ILMN_1695475	NM_006379.2	SEMA3C	10512	SEMA3C	-0.860403	0.179168	0.127442	0.112959	2.75738e-06	5.15251e-05	-0.449095	0.171143	0.2903	0.275515	0.00924535	0.117225	sema domain, immunoglobulin domain (Ig), short basic domain, secreted, (semaphorin) 3C (SEMA3C), mRNA.	SEMAE; SemE
ILMN_1653292	NM_004567.2	PFKFB4	5210	PFKFB4	-1.46215	0.304656	0.12735	0.112866	2.79396e-06	5.21527e-05	-0.706507	0.294569	0.287027	0.272174	0.0172294	0.173596	6-phosphofructo-2-kinase/fructose-2,6-biphosphatase 4 (PFKFB4), mRNA.
ILMN_1651262	NM_004499.3	HNRNPAB	3182	HNRNPAB	-1.21896	0.25399	0.127347	0.112864	2.79495e-06	5.21527e-05	-0.680849	0.239917	0.293641	0.278925	0.0049305	0.0778574	heterogeneous nuclear ribonucleoprotein A/B (HNRNPAB), transcript variant 2, mRNA.	ABBP1; FLJ40338
ILMN_2320250	NM_139235.3	NOL6	65083	NOL6	-1.82685	0.38067	0.127341	0.112857	2.79771e-06	5.21747e-05	-0.796462	0.373866	0.283487	0.26856	0.0341608	0.255471	nucleolar protein family 6 (RNA-associated) (NOL6), transcript variant gamma, mRNA.	MGC20838; NRAP; MGC14921; bA311H10.1; MGC14896; UTP22; FLJ21959
ILMN_1717173	NM_018098.4	ECT2	1894	ECT2	-2.78611	0.581151	0.127185	0.112698	2.86097e-06	5.32075e-05	-1.70019	0.540862	0.298808	0.2842	0.00187979	0.0408374	epithelial cell transforming sequence 2 oncogene (ECT2), mRNA.	FLJ10461; MGC138291
ILMN_2278335	NM_001080538.1	AKR1B15	441282	AKR1B15	-1.94436	0.40564	0.127159	0.112672	2.87152e-06	5.33408e-05	-1.10013	0.38227	0.294292	0.279589	0.00436449	0.0720971	aldo-keto reductase family 1, member B15 (AKR1B15), mRNA.
ILMN_1655307	NM_032822.1	FAM136A	84908	FAM136A	-2.53121	0.528335	0.127083	0.112595	2.90311e-06	5.38853e-05	-1.58425	0.489597	0.300458	0.285884	0.00138369	0.0335608	family with sequence similarity 136, member A (FAM136A), mRNA.	FLJ14668
ILMN_1752294	NM_203487.1	PCDH9	5101	PCDH9	-0.939829	0.196174	0.127079	0.112591	2.90466e-06	5.38928e-05	-0.609899	0.180699	0.303022	0.288501	0.00086007	0.0239836	protocadherin 9 (PCDH9), transcript variant 1, mRNA.
ILMN_1853824	NM_002409.4	MGAT3	4248	MGAT3	-1.21287	0.253187	0.127067	0.112578	2.90982e-06	5.39675e-05	-0.970828	0.225435	0.322306	0.308188	2.41914e-05	0.00188797	mannosyl (beta-1,4-)-glycoprotein beta-1,4-N-acetylglucosaminyltransferase (MGAT3), transcript variant 1, mRNA.	FLJ43371; GNT-III; GNT3; MGC142278; MGC141943
ILMN_1754842	NM_001042486.1	DLGAP4	22839	DLGAP4	-1.54145	0.321795	0.127059	0.11257	2.9133e-06	5.40109e-05	-0.888254	0.30231	0.295288	0.280606	0.00362262	0.0641919	discs, large (Drosophila) homolog-associated protein 4 (DLGAP4), transcript variant 3, mRNA.	RP5-977B1.6; KIAA0964; MGC131862; SAPAP4; DAP4
ILMN_1732967	NM_133471.1	KIAA1949	170954	PPP1R18	-1.36979	0.285978	0.127049	0.11256	2.9173e-06	5.40638e-05	-0.816593	0.267154	0.297294	0.282655	0.00249155	0.0499726	KIAA1949 (KIAA1949), mRNA.	HKMT1098
ILMN_1680104	NM_018389.3	SLC35C1	55343	SLC35C1	-1.14981	0.240205	0.126952	0.112462	2.95806e-06	5.47762e-05	-0.650982	0.226291	0.294273	0.27957	0.00437971	0.0722821	solute carrier family 35, member C1 (SLC35C1), mRNA.	FLJ14841; FUCT1; FLJ11320
ILMN_1706523	NM_021642.2	FCGR2A	2212	FCGR2A	-3.27889	0.685273	0.126889	0.112398	2.98496e-06	5.5231e-05	-1.86192	0.645219	0.29442	0.279721	0.00426082	0.0710298	Fc fragment of IgG, low affinity IIa, receptor (CD32) (FCGR2A), mRNA.	FCGR2A1; CDw32; CD32A; CD32; FcGR; FCG2; IGFR2; FCGR2; MGC30032; MGC23887
ILMN_2395711	NM_199004.1	ARRB2	409	ARRB2	-2.09775	0.438412	0.126892	0.1124	2.984e-06	5.5231e-05	-1.01314	0.423636	0.286931	0.272076	0.0175494	0.175231	arrestin, beta 2 (ARRB2), transcript variant 2, mRNA.	ARR2; ARB2; DKFZp686L0365
ILMN_1762260	NM_000064.1	C3	718	C3	-1.00422	0.209924	0.126855	0.112363	2.99958e-06	5.54799e-05	-0.480159	0.203153	0.286545	0.271681	0.0188997	0.18339	complement component 3 (C3), mRNA.	ASP; CPAMD1
ILMN_1659490	XM_926814.1	LOC653158	653158	ZSWIM6	-1.43849	0.300759	0.126828	0.112336	3.01139e-06	5.56548e-05	-0.844741	0.281602	0.296322	0.281662	0.00298648	0.0564068	PREDICTED: similar to hypothetical protein MGC40405, transcript variant 1 (LOC653158), mRNA.
ILMN_2376416	NM_183008.2	UBXN11	91544	UBXN11	-2.36391	0.494344	0.126798	0.112305	3.02451e-06	5.5858e-05	-1.42318	0.460943	0.297829	0.2832	0.00225552	0.0466838	UBX domain protein 11 (UBXN11), transcript variant 2, mRNA.	PP2243; SOC; COA-1; DKFZp686F04228
ILMN_2196078	NM_052931.3	SLAMF6	114836	SLAMF6	-1.36788	0.286054	0.126797	0.112304	3.02475e-06	5.5858e-05	-0.67963	0.275155	0.288037	0.273204	0.0142081	0.153135	SLAM family member 6 (SLAMF6), mRNA.	NTB-A; SF2000; NTBA; MGC104953; KALIb; Ly108; KALI
ILMN_2388701	NM_001042437.1	ST3GAL5	8869	ST3GAL5	-2.16919	0.453678	0.12678	0.112287	3.03222e-06	5.59741e-05	-0.843169	0.452397	0.280354	0.265362	0.0635738	0.354099	ST3 beta-galactoside alpha-2,3-sialyltransferase 5 (ST3GAL5), transcript variant 2, mRNA.	SIAT9; ST3GalV; SIATGM3S
ILMN_2042771	NM_004219.2	PTTG1	9232	PTTG1	-1.90649	0.398819	0.126748	0.112254	3.04607e-06	5.61859e-05	-1.20531	0.368859	0.301036	0.286474	0.00124297	0.0311692	pituitary tumor-transforming 1 (PTTG1), mRNA.	SECURIN; PTTG; MGC138276; EAP1; TUTR1; MGC126883; HPTTG
ILMN_1744381	NM_000602.1	SERPINE1	5054	SERPINE1	-1.67189	0.349856	0.126699	0.112204	3.06773e-06	5.65194e-05	-0.80585	0.338072	0.286822	0.271965	0.0179197	0.177579	serpin peptidase inhibitor, clade E (nexin, plasminogen activator inhibitor type 1), member 1 (SERPINE1), mRNA.	PAI; PAI-1; PAI1; PLANH1
ILMN_1714730	NM_181803.1	UBE2C	11065	UBE2C	-2.45562	0.513905	0.126685	0.112191	3.07367e-06	5.66067e-05	-1.4755	0.479287	0.297672	0.283041	0.00232218	0.0476879	ubiquitin-conjugating enzyme E2C (UBE2C), transcript variant 6, mRNA.	UBCH10; dJ447F3.2
ILMN_2104295	NM_152390.1	TMEM178	130733	TMEM178	-1.17965	0.246949	0.126639	0.112144	3.09414e-06	5.69615e-05	-0.529728	0.241183	0.284324	0.269414	0.0290223	0.234349	transmembrane protein 178 (TMEM178), mRNA.	MGC33926
ILMN_1773935	NM_018475.2	TMEM165	55858	TMEM165	-2.12795	0.445542	0.126614	0.112118	3.10549e-06	5.7126e-05	-1.16425	0.421922	0.292388	0.277646	0.00623749	0.091217	transmembrane protein 165 (TMEM165), mRNA.	TMPT27; TPARL
ILMN_1655642	NM_018193.2	FANCI	55215	FANCI	-4.36778	0.915001	0.126533	0.112035	3.14173e-06	5.77028e-05	-2.93017	0.837898	0.305336	0.290863	0.000560353	0.0178942	Fanconi anemia, complementation group I (FANCI), transcript variant 2, mRNA.	FLJ10719; KIAA1794
ILMN_1701731	NM_001628.2	AKR1B1	231	AKR1B1	-1.47452	0.30896	0.126501	0.112003	3.15604e-06	5.79432e-05	-0.836314	0.290836	0.294254	0.279551	0.00439573	0.072436	aldo-keto reductase family 1, member B1 (aldose reductase) (AKR1B1), mRNA.	ALDR1; MGC1804; ALR2; AR; ADR
ILMN_1768271	NM_021940.2	SMAP1	60682	SMAP1	-2.6471	0.554754	0.126474	0.111976	3.16835e-06	5.8124e-05	-1.54008	0.520027	0.295678	0.281004	0.00336833	0.0610553	stromal membrane-associated protein 1 (SMAP1), mRNA.	SMAP-1; FLJ13159
ILMN_1852022	XM_001130790.1	KIAA1881	114782	PLIN4	-1.05282	0.220777	0.12638	0.11188	3.21154e-06	5.87341e-05	-0.654124	0.204717	0.299728	0.285139	0.00158445	0.0368051	PREDICTED: KIAA1881 (KIAA1881), mRNA.
ILMN_1784709	NM_005471.3	GNPDA1	10007	GNPDA1	-1.33682	0.280356	0.126368	0.111867	3.21713e-06	5.88136e-05	-0.679197	0.268568	0.288888	0.274074	0.0120819	0.138235	glucosamine-6-phosphate deaminase 1 (GNPDA1), mRNA.	KIAA0060; HLN; GNPDA; GPI; GNPI
ILMN_2139761	NM_014988.1	LIMCH1	22998	LIMCH1	-0.804696	0.168815	0.126318	0.111817	3.23993e-06	5.91846e-05	-0.503867	0.156327	0.300229	0.285651	0.00144368	0.0344662	LIM and calponin homology domains 1 (LIMCH1), mRNA.	DKFZp686B2470; DKFZp781I1455; DKFZp781C1754; LMO7B; DKFZp686G18243; DKFZp686G2094; MGC72127; DKFZp434I0312; DKFZp686A01247; LIMCH1A
ILMN_1690921	NM_005419.2	STAT2	6773	STAT2	-1.7229	0.361556	0.126271	0.111769	3.26218e-06	5.95222e-05	-0.978516	0.340186	0.294268	0.279565	0.00438407	0.0722944	signal transducer and activator of transcription 2, 113kDa (STAT2), mRNA.	ISGF-3; STAT113; MGC59816; P113
ILMN_1693334	NM_000917.2	P4HA1	5033	P4HA1	-1.86254	0.391044	0.1262	0.111697	3.29536e-06	6.00812e-05	-1.04511	0.368626	0.293597	0.27888	0.00497088	0.078286	procollagen-proline, 2-oxoglutarate 4-dioxygenase (proline 4-hydroxylase), alpha polypeptide I (P4HA1), transcript variant 1, mRNA.	P4HA; 4-PH alpha-1
ILMN_3246065	NM_145045.4	CCDC151	115948	CCDC151	-3.88612	0.81606	0.12617	0.111667	3.30947e-06	6.02688e-05	-2.11806	0.772868	0.292091	0.277343	0.00659535	0.0943213	coiled-coil domain containing 151 (CCDC151), mRNA.	FLJ31801
ILMN_1695763	NM_006810.2	PDIA5	10954	PDIA5	-1.71966	0.361129	0.126166	0.111662	3.31171e-06	6.02863e-05	-0.637303	0.361936	0.279249	0.264234	0.0795432	0.395825	protein disulfide isomerase family A, member 5 (PDIA5), mRNA.	FLJ30401; PDIR
ILMN_1756238	NM_145316.2	TMEM217	221468	TMEM217	-4.19017	0.880467	0.126075	0.11157	3.35517e-06	6.09603e-05	-2.59494	0.816644	0.299413	0.284817	0.0016801	0.0381462	transmembrane protein 217 (TMEM217), mRNA.	dJ355M6.2
ILMN_3240308	XM_001719463.1	LOC100133511	100133511	C3	-1.30101	0.273397	0.126064	0.111559	3.36045e-06	6.10327e-05	-0.783952	0.254715	0.297659	0.283027	0.00232784	0.0477833	PREDICTED: similar to complement component C3 (LOC100133511), partial mRNA.
ILMN_2089977	NM_182827.1	FKBP9L	360132	FKBP9L	-1.50436	0.316483	0.125896	0.111388	3.44221e-06	6.23979e-05	-0.546657	0.31781	0.278829	0.263804	0.0867076	0.412958	FK506 binding protein 9-like (FKBP9L), mRNA.	MGC20531; FKBP9
ILMN_1669447	NM_198930.2	PYHIN1	149628	PYHIN1	-2.46831	0.519445	0.125847	0.111339	3.46645e-06	6.27651e-05	-1.00008	0.514111	0.28127	0.266297	0.0529116	0.323768	pyrin and HIN domain family, member 1 (PYHIN1), transcript variant b2, mRNA.	IFIX; MGC23885; RP11-520H16.1
ILMN_1679133	NM_030666.2	SERPINB1	1992	SERPINB1	-1.58273	0.333077	0.125848	0.11134	3.46594e-06	6.27651e-05	-0.931957	0.311421	0.296201	0.281538	0.00305497	0.0574252	serpin peptidase inhibitor, clade B (ovalbumin), member 1 (SERPINB1), mRNA.	EI; MNEI; ELANH2; M/NEI; LEI; PI2
ILMN_1653042	NM_025193.2	HSD3B7	80270	HSD3B7	-1.83153	0.38546	0.125838	0.11133	3.47091e-06	6.28218e-05	-1.13484	0.357416	0.299369	0.284773	0.00169371	0.038235	hydroxy-delta-5-steroid dehydrogenase, 3 beta- and steroid delta-isomerase 7 (HSD3B7), mRNA.	PFIC4
ILMN_1750549	NM_018425.2	PI4K2A	55361	PI4K2A	-3.28848	0.692385	0.125774	0.111264	3.50298e-06	6.33053e-05	-1.74556	0.658192	0.290724	0.275948	0.00853364	0.110907	phosphatidylinositol 4-kinase type 2 alpha (PI4K2A), mRNA.	PIK42A; PI4KII; RP11-548K23.6; DKFZP761G1923
ILMN_1731503	NM_006770.3	MARCO	8685	MARCO	-1.4444	0.304224	0.125722	0.111211	3.5294e-06	6.3661e-05	-0.926203	0.280492	0.301665	0.287116	0.00110601	0.0285894	macrophage receptor with collagenous structure (MARCO), mRNA.	SCARA2
ILMN_1761850	NM_139321.1	ATRN	8455	ATRN	-2.89431	0.609646	0.125712	0.111201	3.5342e-06	6.37234e-05	-1.91111	0.559414	0.303794	0.28929	0.000745451	0.021857	attractin (ATRN), transcript variant 1, mRNA.	DPPT-L; MGC126754; MGCA; KIAA0548
ILMN_1735495	NM_007063.3	TBC1D8	11138	TBC1D8	-1.52256	0.320976	0.125586	0.111073	3.59888e-06	6.46678e-05	-0.676601	0.313407	0.283846	0.268926	0.031853	0.245431	TBC1 domain family, member 8 (with GRAM domain) (TBC1D8), mRNA.	AD3; VRP; HBLP1
ILMN_1762594	NM_022162.1	NOD2	64127	NOD2	-2.33437	0.492421	0.125494	0.11098	3.64657e-06	6.53508e-05	-1.41943	0.457857	0.298048	0.283424	0.00216519	0.0453501	nucleotide-binding oligomerization domain containing 2 (NOD2), mRNA.	NLRC2; CD; CARD15; PSORAS1; CLR16.3; ACUG; NOD2B; BLAU; IBD1
ILMN_1656386	NM_014822.1	SEC24D	9871	SEC24D	-2.38163	0.502448	0.125477	0.110962	3.65549e-06	6.5486e-05	-1.22175	0.480018	0.289126	0.274317	0.0115481	0.134601	SEC24 related gene family, member D (S. cerevisiae) (SEC24D), mRNA.	FLJ43974; KIAA0755
ILMN_1723412	NM_005170.2	ASCL2	430	ASCL2	-2.61053	0.551003	0.125405	0.110889	3.69349e-06	6.60166e-05	-1.49419	0.517309	0.294464	0.279765	0.00422595	0.0707844	achaete-scute complex homolog 2 (Drosophila) (ASCL2), mRNA.	ASH2; MASH2; HASH2
ILMN_1671123	XM_943178.1	LOC647543	647543	LOC285419	-2.07717	0.438774	0.125287	0.110769	3.75644e-06	6.70151e-05	-0.983738	0.424219	0.285938	0.271061	0.0212389	0.196262	PREDICTED: hypothetical protein LOC647543, transcript variant 2 (LOC647543), mRNA.
ILMN_1724407	NM_006342.1	TACC3	10460	TACC3	-2.45356	0.51846	0.125236	0.110717	3.78417e-06	6.74335e-05	-1.31382	0.491847	0.291017	0.276246	0.00807527	0.107252	transforming, acidic coiled-coil containing protein 3 (TACC3), mRNA.	MGC133242; ERIC1; MGC117382
ILMN_2049766	NM_004289.5	NFE2L3	9603	NFE2L3	-2.47312	0.522955	0.125134	0.110613	3.84015e-06	6.83795e-05	-1.63577	0.479545	0.303696	0.28919	0.000759068	0.0221328	nuclear factor (erythroid-derived 2)-like 3 (NFE2L3), mRNA.	NRF3
ILMN_1775235	NM_001025108.1	AFF3	3899	AFF3	-0.907614	0.191944	0.125115	0.110594	3.85055e-06	6.85388e-05	-0.416957	0.186365	0.284854	0.269955	0.0261848	0.222252	AF4/FMR2 family, member 3 (AFF3), transcript variant 2, mRNA.	MLLT2-like; LAF4
ILMN_1679391	NM_153267.3	MAMDC2	256691	MAMDC2	-0.729737	0.154416	0.125028	0.110506	3.89853e-06	6.93407e-05	-0.447536	0.14332	0.298442	0.283826	0.00201245	0.0429111	MAM domain containing 2 (MAMDC2), mRNA.	MGC21981
ILMN_3221432	NM_005807.3	PRG4	10216	PRG4	-0.547295	0.115838	0.124992	0.110469	3.91871e-06	6.96474e-05	-0.268927	0.111327	0.287268	0.272419	0.0164548	0.168273	proteoglycan 4 (PRG4), transcript variant A, mRNA.
ILMN_1691508	NM_001005376.1	PLAUR	5329	PLAUR	-2.17207	0.459778	0.124978	0.110455	3.92678e-06	6.97383e-05	-1.14913	0.436865	0.290396	0.275612	0.00908038	0.115816	plasminogen activator, urokinase receptor (PLAUR), transcript variant 2, mRNA.	CD87; UPAR; URKR
ILMN_1666670	NM_014248.2	RBX1	9978	RBX1	-2.09894	0.444295	0.124979	0.110456	3.92626e-06	6.97383e-05	-1.1381	0.420528	0.291559	0.2768	0.00729071	0.100497	ring-box 1 (RBX1), mRNA.	BA554C12.1; RNF75; MGC13357; MGC1481; ROC1
ILMN_1704985	NM_000784.2	CYP27A1	1593	CYP27A1	-0.82828	0.175342	0.124966	0.110443	3.93358e-06	6.98328e-05	-0.470456	0.164745	0.293929	0.27922	0.00467081	0.075162	cytochrome P450, family 27, subfamily A, polypeptide 1 (CYP27A1), nuclear gene encoding mitochondrial protein, mRNA.	CYP27; CTX; CP27
ILMN_2071937	NM_003945.3	ATP6V0E1	8992	ATP6V0E1	-1.63137	0.345393	0.124948	0.110424	3.94378e-06	6.99614e-05	-1.01331	0.319896	0.299236	0.284636	0.00173624	0.0388429	ATPase, H+ transporting, lysosomal 9kDa, V0 subunit e1 (ATP6V0E1), mRNA.	Vma21p; ATP6V0E; Vma21; ATP6H; M9.2
ILMN_1743049	NM_007062.1	PWP1	11137	PWP1	-2.22123	0.470756	0.124798	0.110272	4.0296e-06	7.135e-05	-1.35201	0.437369	0.297893	0.283266	0.00222862	0.0462282	PWP1 homolog (S. cerevisiae) (PWP1), mRNA.	IEF-SSP-9502
ILMN_1741200	NM_001025603.1	RFX5	5993	RFX5	-2.29082	0.485609	0.124766	0.110239	4.04798e-06	7.1595e-05	-1.42638	0.449518	0.299333	0.284736	0.00170498	0.0383822	regulatory factor X, 5 (influences HLA class II expression) (RFX5), transcript variant 2, mRNA.
ILMN_1801302	NM_001037.3	SCN1B	6324	SCN1B	-3.70094	0.784596	0.124753	0.110226	4.05575e-06	7.17057e-05	-2.37939	0.722554	0.301499	0.286947	0.00114059	0.0291825	sodium channel, voltage-gated, type I, beta (SCN1B), transcript variant a, mRNA.	GEFSP1
ILMN_1796074	NM_001012716.1	C18orf56	494514	C18orf56	-1.96499	0.416653	0.124725	0.110198	4.07166e-06	7.19331e-05	-0.862347	0.406964	0.283346	0.268416	0.0351201	0.259583	chromosome 18 open reading frame 56 (C18orf56), mRNA.
ILMN_1739161	NM_003711.2	PPAP2A	8611	PPAP2A	-1.01857	0.216335	0.124481	0.109949	4.21688e-06	7.42215e-05	-0.445756	0.211299	0.28323	0.268297	0.0359291	0.26237	phosphatidic acid phosphatase type 2A (PPAP2A), transcript variant 1, mRNA.	PAP2a2; LLP1a; PAP-2a; LPP1; PAP2alpha2; PAP2; PAPalpha1
ILMN_2402798	NM_004068.3	AP2M1	1173	AP2M1	-1.51126	0.321087	0.12443	0.109898	4.24764e-06	7.46796e-05	-0.934253	0.29748	0.298757	0.284148	0.00189789	0.0410796	adaptor-related protein complex 2, mu 1 subunit (AP2M1), transcript variant 1, mRNA.	AP50; mu2; CLAPM1
ILMN_1653166	NM_006344.2	CLEC10A	10462	CLEC10A	-3.33921	0.709536	0.124414	0.109881	4.2576e-06	7.47712e-05	-2.24931	0.648436	0.304793	0.29031	0.000619503	0.019195	C-type lectin domain family 10, member A (CLEC10A), transcript variant 2, mRNA.	HML; CD301; HML2; CLECSF13; CLECSF14
ILMN_1717261	NM_022555.3	HLA-DRB3	3125		-0.876959	0.186341	0.124415	0.109882	4.2571e-06	7.47712e-05	-0.425393	0.17928	0.286672	0.271811	0.0184435	0.180665	major histocompatibility complex, class II, DR beta 3 (HLA-DRB3), mRNA.	MGC117330; HLA-DR3B
ILMN_1796397	NM_001008388.1	CISD2	493856	CISD2	-2.73819	0.581888	0.124398	0.109866	4.26706e-06	7.49096e-05	-1.76781	0.535376	0.301664	0.287115	0.00110624	0.0285894	CDGSH iron sulfur domain 2 (CISD2), mRNA.	ERIS; WFS2; ZCD2; Miner1
ILMN_1792314	NM_005736.2	ACTR1A	10121	ACTR1A	-1.83372	0.38992	0.124308	0.109774	4.32239e-06	7.58527e-05	-1.09241	0.363347	0.296437	0.281779	0.00292334	0.0555246	ARP1 actin-related protein 1 homolog A, centractin alpha (yeast) (ACTR1A), mRNA.	ARP1
ILMN_2376484	NM_018534.3	NRP2	8828	NRP2	-3.58878	0.76315	0.124301	0.109767	4.32695e-06	7.59046e-05	-1.74759	0.733687	0.286798	0.27194	0.0180024	0.178007	neuropilin 2 (NRP2), transcript variant 4, mRNA.	MGC126574; NPN2; VEGF165R2; NP2; PRO2714
ILMN_1729563	NM_003359.2	UGDH	7358	UGDH	-1.07585	0.228842	0.12426	0.109725	4.35264e-06	7.62986e-05	-0.436674	0.225756	0.281145	0.266169	0.0542556	0.327083	UDP-glucose dehydrogenase (UGDH), mRNA.	UDPGDH; UGD; UDP-GlcDH; GDH
ILMN_3251379	NM_024881.4	SLC35E1	79939	SLC35E1	-2.19781	0.467563	0.124238	0.109702	4.36653e-06	7.65138e-05	-1.13624	0.445425	0.28921	0.274402	0.011366	0.13322	solute carrier family 35, member E1 (SLC35E1), mRNA.	MGC44954; FLJ14251; DKFZp564G0462; FLJ36689
ILMN_1726230	NM_001764.2	CD1B	910	CD1B	-3.16421	0.673188	0.124231	0.109695	4.37072e-06	7.65589e-05	-1.53077	0.647764	0.28654	0.271676	0.0189179	0.18339	CD1b molecule (CD1B), mRNA.	R1; MGC125991; CD1; MGC125990; CD1A
ILMN_1759952	NM_002790.2	PSMA5	5686	PSMA5	-1.93701	0.41222	0.124188	0.109651	4.39777e-06	7.69756e-05	-0.988635	0.393447	0.288653	0.273833	0.012636	0.142104	proteasome (prosome, macropain) subunit, alpha type, 5 (PSMA5), mRNA.	ZETA; MGC117302; MGC125802; PSC5; MGC125804; MGC125803
ILMN_1658995	NM_001033583.2	ACOT9	23597	ACOT9	-1.81962	0.387251	0.124183	0.109647	4.4008e-06	7.69804e-05	-1.01158	0.364768	0.292607	0.277869	0.00598627	0.0887228	acyl-CoA thioesterase 9 (ACOT9), transcript variant 2, mRNA.	MT-ACT48; CGI-16; ACATE2
ILMN_1678454	NM_001225.3	CASP4	837	CASP4	-1.72382	0.36688	0.124176	0.109639	4.40543e-06	7.70241e-05	-0.88434	0.349893	0.288867	0.274051	0.0121324	0.138596	caspase 4, apoptosis-related cysteine peptidase (CASP4), transcript variant alpha, mRNA.	TX; Mih1/TX; ICH-2; ICE(rel)II; ICEREL-II
ILMN_2401730	NM_001011551.1	C1GALT1C1	29071	C1GALT1C1	-3.53478	0.752345	0.124168	0.109632	4.41005e-06	7.70765e-05	-2.49004	0.682627	0.308288	0.293877	0.000324513	0.0121324	C1GALT1-specific chaperone 1 (C1GALT1C1), transcript variant 2, mRNA.	MGC19947; C1GALT2; HSPC067; C1Gal-T2; COSMC; c38h2-l1
ILMN_1653708	NM_001018070.1	CORO1B	57175	CORO1B	-2.30636	0.491051	0.12412	0.109582	4.44081e-06	7.75837e-05	-1.14112	0.470848	0.287378	0.272532	0.0161105	0.16626	coronin, actin binding protein, 1B (CORO1B), transcript variant 2, mRNA.	CORONIN-2; DKFZP762I166
ILMN_2279961	NM_013995.1	LAMP2	3920	LAMP2	-1.5163	0.322897	0.124093	0.109555	4.4582e-06	7.78318e-05	-0.779046	0.307843	0.288913	0.274099	0.012025	0.137969	lysosomal-associated membrane protein 2 (LAMP2), transcript variant LAMP2B, mRNA.	LAMPB; CD107b; LAMP-2C
ILMN_1682938	NM_001659.1	ARF3	377	ARF3	-1.65638	0.352842	0.124045	0.109507	4.48857e-06	7.83257e-05	-0.887882	0.334191	0.290797	0.276022	0.00841761	0.110217	ADP-ribosylation factor 3 (ARF3), mRNA.
ILMN_1655418	NM_001003962.1	CAPNS1	826	CAPNS1	-1.33682	0.284806	0.124027	0.109488	4.50057e-06	7.84556e-05	-0.639871	0.274399	0.286113	0.27124	0.0205341	0.192191	calpain, small subunit 1 (CAPNS1), transcript variant 2, mRNA.	CANP; CALPAIN4; CDPS; 30K; CANPS; CAPN4
ILMN_2077550	NM_013277.2	RACGAP1	29127	RACGAP1	-3.28006	0.699525	0.123876	0.109334	4.59881e-06	8.00207e-05	-2.05766	0.646291	0.299524	0.28493	0.00164581	0.0377026	Rac GTPase activating protein 1 (RACGAP1), mRNA.	HsCYK-4; MgcRacGAP; ID-GAP
ILMN_1673544	NM_153035.1	C1orf83	127428	TCEANC2	-3.55667	0.758604	0.123859	0.109317	4.61021e-06	8.01011e-05	-2.12335	0.706368	0.296428	0.28177	0.00292812	0.0555623	chromosome 1 open reading frame 83 (C1orf83), mRNA.	FLJ39169; RP4-758J24.3; FLJ32112
ILMN_1696749	NM_005572.3	LMNA	4000	LMNA	-1.07009	0.228236	0.123861	0.109319	4.60879e-06	8.01011e-05	-0.527738	0.218871	0.287205	0.272355	0.0166533	0.169742	lamin A/C (LMNA), transcript variant 2, mRNA.	HGPS; EMD2; FPLD; LDP1; LMNC; FPL; LFP; CDCD1; LGMD1B; IDC; CMT2B1; PRO1; LMN1; CMD1A; CDDC
ILMN_1708632	NM_016643.1	ZNF771	51333		-1.07256	0.228788	0.123845	0.109303	4.61897e-06	8.02238e-05	-0.670946	0.211466	0.299328	0.284731	0.00170666	0.0383822	zinc finger protein 771 (ZNF771), mRNA.	DSC43
ILMN_3249748	NM_001135239.1	LDHA	3939	LDHA	-1.46867	0.313549	0.123721	0.109177	4.70212e-06	8.16081e-05	-0.914917	0.289971	0.299015	0.284412	0.00180877	0.0397816	lactate dehydrogenase A (LDHA), transcript variant 2, mRNA.
ILMN_1700633	NM_022060.2	ABHD4	63874	ABHD4	-2.61681	0.559545	0.123492	0.108944	4.85904e-06	8.40231e-05	-1.4811	0.52519	0.293355	0.278633	0.00520193	0.0808213	abhydrolase domain containing 4 (ABHD4), mRNA.	FLJ12816
ILMN_1711092	NM_004975.2	KCNB1	3745	KCNB1	-1.52935	0.327192	0.123413	0.108864	4.91382e-06	8.49234e-05	-0.613567	0.322762	0.280768	0.265784	0.0585019	0.338942	potassium voltage-gated channel, Shab-related subfamily, member 1 (KCNB1), mRNA.	KV2.1; h-DRK1; DRK1
ILMN_1794956	NM_001033604.1	BBS9	27241	BBS9	-3.05553	0.653834	0.123385	0.108835	4.93405e-06	8.52267e-05	-1.97298	0.601107	0.301301	0.286745	0.00118317	0.0299877	Bardet-Biedl syndrome 9 (BBS9), transcript variant 3, mRNA.	PTHB1; C18; MGC118917; B1; D1
ILMN_1798006	NM_144698.2	ANKRD35	148741	ANKRD35	-1.41936	0.303775	0.123358	0.108808	4.95273e-06	8.5487e-05	-0.849894	0.282594	0.296453	0.281796	0.0029145	0.055379	ankyrin repeat domain 35 (ANKRD35), mRNA.	MGC126667; FLJ25124; MGC126669
ILMN_2041101	NR_001562.1	ANXA2P1	303	ANXA2P1	-0.756989	0.162039	0.123335	0.108784	4.96952e-06	8.57143e-05	-0.402063	0.153557	0.290214	0.275426	0.00939815	0.118548	annexin A2 pseudogene 1 (ANXA2P1) on chromosome 4.	LPC2A; ANX2L1; ANX2P1
ILMN_2222234	NM_006406.1	PRDX4	10549	PRDX4	-1.82597	0.391052	0.123264	0.108712	5.02022e-06	8.65572e-05	-0.777416	0.382599	0.282285	0.267333	0.0432621	0.290688	peroxiredoxin 4 (PRDX4), mRNA.	PRX-4; AOE37-2
ILMN_1686097	NM_001067.2	TOP2A	7153	TOP2A	-1.92969	0.413318	0.123245	0.108693	5.03346e-06	8.67223e-05	-1.25082	0.37972	0.301518	0.286966	0.00113661	0.0291196	topoisomerase (DNA) II alpha 170kDa (TOP2A), mRNA.	TOP2; TP2A
ILMN_2367215	NM_005040.2	PRCP	5547	PRCP	-1.17572	0.251867	0.123222	0.10867	5.05041e-06	8.69509e-05	-0.533045	0.244265	0.284143	0.269229	0.0300619	0.238359	prolylcarboxypeptidase (angiotensinase C) (PRCP), transcript variant 1, mRNA.	HUMPCP; PCP; MGC2202
ILMN_1753472	NM_182760.2	SUMF1	285362	SUMF1	-1.45593	0.311956	0.123193	0.10864	5.07162e-06	8.72842e-05	-0.727095	0.298319	0.287572	0.27273	0.0155245	0.162365	sulfatase modifying factor 1 (SUMF1), mRNA.	MGC131853; FGE; MGC150436; AAPA3037
ILMN_1770922	NM_018004.1	TMEM45A	55076	TMEM45A	-1.83432	0.393074	0.123178	0.108625	5.08235e-06	8.74371e-05	-1.40559	0.351935	0.315437	0.301175	8.64594e-05	0.00474363	transmembrane protein 45A (TMEM45A), mRNA.	DERP7; FLJ10134
ILMN_1768870	NM_006136.2	CAPZA2	830	CAPZA2	-2.02732	0.434468	0.123166	0.108612	5.09138e-06	8.75607e-05	-1.15443	0.407268	0.293588	0.278871	0.00497955	0.0783442	capping protein (actin filament) muscle Z-line, alpha 2 (CAPZA2), mRNA.	CAPZ; CAPPA2
ILMN_3257030	XR_016025.2	FTHL16	2508	RSF1	-1.8729	0.401649	0.123067	0.108512	5.16404e-06	8.86491e-05	-0.796249	0.392908	0.282221	0.267267	0.0438139	0.292551	PREDICTED: misc_RNA (FTHL16), miscRNA.
ILMN_1716563	NM_212535.1	PRKCB1	5579		-2.0138	0.43199	0.123025	0.108469	5.19526e-06	8.91525e-05	-0.958625	0.415915	0.285748	0.270868	0.0220287	0.200449	protein kinase C, beta 1 (PRKCB1), transcript variant 1, mRNA.	PRKCB2; PRKCB; MGC41878; PKCB; PKC-beta
ILMN_1747197	NM_032148.2	SLC41A2	84102	SLC41A2	-3.35584	0.719913	0.123017	0.108462	5.20061e-06	8.92121e-05	-2.08712	0.66556	0.298675	0.284064	0.00192715	0.0414866	solute carrier family 41, member 2 (SLC41A2), mRNA.	MGC125331; MGC125330; SLC41A1-L1; DKFZP434K0427
ILMN_1697433	NM_006668.1	CYP46A1	10858	CYP46A1	-1.97398	0.42357	0.122983	0.108426	5.22645e-06	8.95904e-05	-1.50636	0.37945	0.314924	0.300652	9.50656e-05	0.00509754	cytochrome P450, family 46, subfamily A, polypeptide 1 (CYP46A1), mRNA.	CP46; CYP46
ILMN_1751072	NM_021203.2	SRPRB	58477	SRPRB	-1.53618	0.329901	0.122862	0.108304	5.31732e-06	9.10161e-05	-0.940626	0.305695	0.297646	0.283014	0.00233354	0.047838	signal recognition particle receptor, B subunit (SRPRB), mRNA.	APMCF1
ILMN_3243928	NM_001012967.1	DDX60L	91351	DDX60L	-2.40544	0.516942	0.122761	0.108201	5.39499e-06	9.22787e-05	-1.34837	0.485543	0.292667	0.277931	0.00591871	0.0882749	DEAD (Asp-Glu-Ala-Asp) box polypeptide 60-like (DDX60L), mRNA.	FLJ13468; DKFZp781D1175; FLJ31033; FLJ39050
ILMN_1772124	NM_139321.1	ATRN	8455	ATRN	-2.71186	0.583239	0.12265	0.108089	5.4811e-06	9.35148e-05	-1.35516	0.557274	0.287494	0.27265	0.0157581	0.163867	attractin (ATRN), transcript variant 1, mRNA.	DPPT-L; MGC126754; MGCA; KIAA0548
ILMN_1673363	NM_078481.2	CD97	976	CD97	-0.769116	0.165518	0.122559	0.107996	5.55346e-06	9.47152e-05	-0.408411	0.15671	0.290031	0.27524	0.00972903	0.121282	CD97 molecule (CD97), transcript variant 1, mRNA.	TM7LN1
ILMN_1712975	NM_020470.1	YIF1A	10897	YIF1A	-1.68475	0.363075	0.122358	0.107791	5.71541e-06	9.72669e-05	-0.915182	0.342497	0.29103	0.27626	0.00805463	0.107097	Yip1 interacting factor homolog A (S. cerevisiae) (YIF1A), mRNA.	FinGER7; 54TM; YIF1P; YIF1
ILMN_1765446	NM_001425.1	EMP3	2014	EMP3	-0.730736	0.157516	0.122324	0.107756	5.74357e-06	9.76407e-05	-0.358919	0.150814	0.28677	0.271911	0.0181004	0.178677	epithelial membrane protein 3 (EMP3), mRNA.	YMP
ILMN_1748707	NM_024324.2	CRELD2	79174	CRELD2	-1.5734	0.339293	0.122267	0.107698	5.79069e-06	9.82299e-05	-0.910201	0.316988	0.294186	0.279481	0.00445179	0.0730708	cysteine-rich with EGF-like domains 2 (CRELD2), mRNA.	DKFZp667O055; MGC11256
ILMN_1803560	NM_022040.2	LAT2	7462	LAT2	-1.52013	0.327955	0.122201	0.107632	5.84534e-06	9.91213e-05	-0.732656	0.314803	0.286051	0.271177	0.0207795	0.193492	linker for activation of T cells family, member 2 (LAT2), transcript variant 1, mRNA.	WBSCR5; WBSCR15; HSPC046; NTAL; WSCR5; LAB
ILMN_1765557	NM_015441.1	OLFML2B	25903	OLFML2B	-1.18689	0.256226	0.122109	0.107538	5.92267e-06	0.000100325	-0.700155	0.23863	0.295219	0.280536	0.00366984	0.064782	olfactomedin-like 2B (OLFML2B), mRNA.	RP11-227F8.1; MGC51337
ILMN_1702065	NM_032889.3	MFSD5	84975	MFSD5	-2.38528	0.514953	0.122104	0.107533	5.9274e-06	0.000100369	-1.5532	0.472371	0.301409	0.286855	0.0011599	0.0295347	major facilitator superfamily domain containing 5 (MFSD5), mRNA.	MGC11308
ILMN_2315789	NM_130391.2	PTPRD	5789	PTPRD	-1.88091	0.406118	0.122085	0.107514	5.94297e-06	0.000100597	-1.09641	0.378911	0.294549	0.279852	0.00415912	0.0701409	protein tyrosine phosphatase, receptor type, D (PTPRD), transcript variant 2, mRNA.	HPTPD; R-PTP-DELTA; HPTP; HPTP-DELTA; MGC119751; MGC119750; MGC119753; MGC119752; PTPD
ILMN_2153787	NM_001080523.1	ARRDC5	645432	ARRDC5	-3.74737	0.809274	0.122057	0.107486	5.96693e-06	0.000100966	-2.11557	0.75872	0.292847	0.278114	0.00572253	0.0862485	arrestin domain containing 5 (ARRDC5), mRNA.
ILMN_1696004	NM_024652.3	LRRK1	79705	LRRK1	-1.97788	0.427645	0.121887	0.107313	6.11405e-06	0.000103197	-1.04744	0.404717	0.289761	0.274964	0.0102397	0.125031	leucine-rich repeat kinase 1 (LRRK1), mRNA.	FLJ23119; RIPK6; KIAA1790; FLJ27465; Roco1
ILMN_2374352	NM_001042610.1	DBNDD1	79007	DBNDD1	-0.545941	0.118063	0.121859	0.107284	6.13843e-06	0.000103571	-0.36629	0.107788	0.303454	0.288942	0.000793929	0.0227979	dysbindin (dystrobrevin binding protein 1) domain containing 1 (DBNDD1), transcript variant 1, mRNA.	MGC3101; FLJ12582
ILMN_1724959	NM_014933.2	SEC31A	22872	SEC31A	-1.98832	0.430277	0.121763	0.107186	6.2238e-06	0.000104937	-1.03265	0.408317	0.28889	0.274075	0.0120792	0.138235	SEC31 homolog A (S. cerevisiae) (SEC31A), transcript variant 1, mRNA.	KIAA0905; HSPC334; MGC90305; ABP125; SEC31L1; HSPC275; DKFZp686N07171; ABP130
ILMN_2406557	NM_170726.1	ALDH4A1	8659	ALDH4A1	-1.63324	0.353484	0.121744	0.107167	6.24075e-06	0.000105148	-0.909219	0.331991	0.292063	0.277314	0.0066311	0.0946469	aldehyde dehydrogenase 4 family, member A1 (ALDH4A1), nuclear gene encoding mitochondrial protein, transcript variant P5CDhS, mRNA.	P5CDh; P5CD; ALDH4; P5CDhL; P5CDhS
ILMN_1706261	XM_941061.1	SLCO3A1	28232	SLCO3A1	-2.36094	0.511088	0.121714	0.107136	6.26756e-06	0.000105487	-1.23626	0.484391	0.289229	0.274421	0.0113256	0.132878	PREDICTED: solute carrier organic anion transporter family, member 3A1, transcript variant 2 (SLCO3A1), mRNA.
ILMN_1795937	NM_003379.3	VIL2	7430	EZR	-1.3849	0.299953	0.12164	0.107062	6.33386e-06	0.000106527	-0.801568	0.280036	0.294039	0.279331	0.00457625	0.0742155	villin 2 (ezrin) (VIL2), mRNA.	MGC1584; CVL; FLJ26216; DKFZp762H157; CVIL
ILMN_1658989	NM_032246.3	MEX3B	84206	MEX3B	-2.10402	0.455761	0.121623	0.107044	6.34965e-06	0.000106717	-1.31524	0.42054	0.298527	0.283913	0.00198065	0.0423859	mex-3 homolog B (C. elegans) (MEX3B), mRNA.	RNF195; DKFZp434J0617; RKHD3; MGC117199; MEX-3B
ILMN_1664242	NM_001099407.1	C20orf12	55184	DZANK1	-3.58601	0.776885	0.121604	0.107025	6.36697e-06	0.00010697	-2.37494	0.710559	0.302409	0.287876	0.000963478	0.0259492	chromosome 20 open reading frame 12 (C20orf12), mRNA.	bA189K21.8; DKFZp781J2425; dJ568F9.2; FLJ30892; bA189K21.1; C20orf84; FLJ10600
ILMN_1695354	NM_033503.3	BMF	90427	BMF	-2.93154	0.635266	0.121566	0.106986	6.40161e-06	0.000107513	-1.64179	0.595987	0.292315	0.277571	0.00632406	0.0918582	Bcl2 modifying factor (BMF), transcript variant 2, mRNA.	FLJ00065
ILMN_1766010	NM_003680.2	YARS	8565	YARS	-1.62774	0.353031	0.121446	0.106864	6.51252e-06	0.000109144	-1.04735	0.324275	0.300349	0.285773	0.00141183	0.0338596	tyrosyl-tRNA synthetase (YARS), mRNA.	CMTDIC; YTS; TYRRS; YRS
ILMN_1747016	NM_018131.3	CEP55	55165	CEP55	-2.50947	0.544297	0.121437	0.106855	6.52088e-06	0.000109224	-1.4932	0.505932	0.295508	0.280831	0.00347696	0.0623113	centrosomal protein 55kDa (CEP55), mRNA.	URCC6; C10orf3; FLJ10540
ILMN_1776173	NM_002811.3	PSMD7	5713	PSMD7	-1.82345	0.395527	0.121428	0.106846	6.52944e-06	0.000109311	-1.20122	0.362009	0.301962	0.28742	0.0010467	0.0275779	proteasome (prosome, macropain) 26S subunit, non-ATPase, 7 (PSMD7), mRNA.	P40; S12; MOV34
ILMN_1710937	NM_005531.1	IFI16	3428	IFI16	-1.28122	0.277937	0.121414	0.106832	6.54219e-06	0.000109486	-0.572442	0.269304	0.283429	0.2685	0.034555	0.257281	interferon, gamma-inducible protein 16 (IFI16), mRNA.	IFNGIP1; PYHIN2
ILMN_1742167	NM_032704.2	TUBA1C	84790		-0.841549	0.182691	0.121311	0.106727	6.639e-06	0.000110949	-0.411185	0.174798	0.286391	0.271525	0.0194643	0.186534	tubulin, alpha 1c (TUBA1C), mRNA.	MGC14580; TUBA6; bcm948; MGC10851
ILMN_2383516	NM_015285.2	WDR7	23335	WDR7	-2.80598	0.609179	0.121304	0.10672	6.6461e-06	0.000111025	-1.88939	0.555666	0.303491	0.288981	0.000788419	0.0227002	WD repeat domain 7 (WDR7), transcript variant 1, mRNA.	TRAG; KIAA0541
ILMN_1738103	NM_199442.1	COPE	11316	COPE	-1.92985	0.419011	0.12129	0.106706	6.65928e-06	0.00011113	-1.31906	0.381337	0.304606	0.290119	0.000641334	0.0196701	coatomer protein complex, subunit epsilon (COPE), transcript variant 2, mRNA.	FLJ13241; epsilon-COP
ILMN_2061318	NM_005645.3	TAF13	6884	TAF13	-2.67242	0.580368	0.121258	0.106673	6.68967e-06	0.000111559	-1.87137	0.52626	0.306478	0.29203	0.000453532	0.0156548	TAF13 RNA polymerase II, TATA box binding protein (TBP)-associated factor, 18kDa (TAF13), mRNA.	TAFII18; MGC22425; TAF2K
ILMN_1803673	XM_053966.11	LOC113230	113230	LOC113230	-3.73865	0.812107	0.121226	0.10664	6.72066e-06	0.000112036	-1.93847	0.770321	0.288706	0.273888	0.0125077	0.14128	PREDICTED: hypothetical protein LOC113230 (LOC113230), mRNA.
ILMN_1695423	NM_001769.2	CD9	928	CD9	-0.776222	0.168651	0.121192	0.106606	6.75358e-06	0.000112466	-0.345515	0.163436	0.283285	0.268353	0.0355412	0.261038	CD9 molecule (CD9), mRNA.	MRP-1; MIC3; BTCC-1; BA2; 5H9; TSPAN29; GIG2; DRAP-27; P24
ILMN_1756992	NM_001044391.1	MUC1	4582	MUC1	-1.81837	0.395142	0.121169	0.106583	6.77544e-06	0.000112751	-1.08047	0.367276	0.295348	0.280668	0.00358199	0.0636388	mucin 1, cell surface associated (MUC1), transcript variant 6, mRNA.	PEMT; PUM; PEM; EMA; H23AG; MAM6; CD227
ILMN_1715684	NM_000228.2	LAMB3	3914	LAMB3	-0.846286	0.183971	0.121117	0.106529	6.82643e-06	0.000113479	-0.386869	0.177616	0.28409	0.269175	0.030371	0.239394	laminin, beta 3 (LAMB3), transcript variant 1, mRNA.	LAMNB1
ILMN_2204545	NM_006278.1	ST3GAL4	6484	ST3GAL4	-3.14546	0.683798	0.121113	0.106525	6.8304e-06	0.000113506	-2.705	0.602001	0.326589	0.31256	1.09072e-05	0.00105706	ST3 beta-galactoside alpha-2,3-sialyltransferase 4 (ST3GAL4), mRNA.	NANTA3; ST3GalIV; CGS23; ST3Gal IV; SIAT4; SAT3; FLJ11867; SIAT4C; STZ
ILMN_1747775	NM_194356.1	STX2	2054	STX2	-1.79901	0.391302	0.121036	0.106447	6.90587e-06	0.000114518	-0.789753	0.379812	0.282858	0.267917	0.0386495	0.273213	syntaxin 2 (STX2), transcript variant 2, mRNA.	MGC51014; STX2C; STX2A; EPM; STX2B; EPIM
ILMN_1704842	NM_001037164.1	ARL4A	10124	ARL4A	-3.54581	0.771302	0.121026	0.106438	6.91524e-06	0.000114626	-1.69666	0.739858	0.285592	0.270709	0.0227004	0.204204	ADP-ribosylation factor-like 4A (ARL4A), transcript variant 3, mRNA.	ARL4
ILMN_1758825	NM_032432.3	ABLIM2	84448	ABLIM2	-2.41169	0.52461	0.121024	0.106435	6.91723e-06	0.000114626	-1.35095	0.491868	0.292186	0.27744	0.00647868	0.0931459	actin binding LIM protein family, member 2 (ABLIM2), mRNA.	FLJ39684; KIAA1808; DKFZp761F129; MGC141918
ILMN_1763704	NM_183337.1	RGS11	8786	RGS11	-0.817667	0.177883	0.12101	0.106421	6.9315e-06	0.000114823	-0.568517	0.161449	0.305805	0.291342	0.000513763	0.0168865	regulator of G-protein signaling 11 (RGS11), transcript variant 1, mRNA.	RS11
ILMN_1747303	NM_005804.2	DDX39	10212	DDX39A	-1.84904	0.402418	0.120954	0.106364	6.98762e-06	0.000115712	-0.885395	0.385933	0.285605	0.270722	0.0226452	0.203842	DEAD (Asp-Glu-Ala-Asp) box polypeptide 39 (DDX39), mRNA.	BAT1; MGC18203; BAT1L; DDXL; URH49; MGC8417
ILMN_2111932	NM_178865.3	SERINC2	347735	SERINC2	-3.75277	0.816913	0.120923	0.106333	7.01786e-06	0.000116131	-2.38727	0.751375	0.299406	0.28481	0.00168217	0.0381462	serine incorporator 2 (SERINC2), mRNA.	TDE2; PRO0899; MGC90340; FKSG84; TDE2L
ILMN_1790637	NM_024650.2	C11orf80	79703	C11orf80	-2.80368	0.610478	0.120885	0.106294	7.05608e-06	0.000116723	-1.51367	0.575414	0.290398	0.275615	0.00907575	0.115789	chromosome 11 open reading frame 80 (C11orf80), mRNA.	FLJ22531	D
ILMN_1652505	NM_014481.2	APEX2	27301	APEX2	-2.88305	0.627786	0.12088	0.106288	7.0619e-06	0.000116737	-1.76709	0.580642	0.297066	0.282421	0.0026	0.0514281	APEX nuclease (apurinic/apyrimidinic endonuclease) 2 (APEX2), nuclear gene encoding mitochondrial protein, mRNA.	XTH2; APEXL2; APE2
ILMN_1724181	NM_000585.2	IL15	3600	IL15	-2.34807	0.51171	0.120764	0.106171	7.17958e-06	0.000118393	-1.2633	0.482495	0.290213	0.275425	0.0093999	0.118548	interleukin 15 (IL15), transcript variant 3, mRNA.	MGC9721; IL-15
ILMN_1806999	NM_030578.2	B9D2	80776	B9D2	-2.96142	0.645544	0.120728	0.106134	7.21711e-06	0.000118929	-1.6358	0.606314	0.291428	0.276666	0.00747224	0.102225	B9 protein domain 2 (B9D2), mRNA.	MGC4093; ICIS-1
ILMN_2404085	NM_002956.2	CLIP1	6249	CLIP1	-1.46136	0.318607	0.120705	0.10611	7.24094e-06	0.000119238	-0.701022	0.305367	0.285625	0.270742	0.0225577	0.203363	CAP-GLY domain containing linker protein 1 (CLIP1), transcript variant 1, mRNA.	CYLN1; MGC131604; RSN; CLIP-170; CLIP170; CLIP
ILMN_1804863	NM_015258.1	FKBP15	23307	FKBP15	-2.32148	0.506627	0.120566	0.105969	7.3862e-06	0.000121461	-1.06812	0.488273	0.284211	0.269298	0.0296677	0.236731	FK506 binding protein 15, 133kDa (FKBP15), mRNA.	FKBP133; KIAA0674
ILMN_3199755	XM_929781.1	LOC646821	646821	C1orf146	-3.89147	0.850517	0.120357	0.105757	7.61023e-06	0.000124755	-1.72573	0.823502	0.283057	0.268121	0.0371655	0.267308	PREDICTED: similar to beta-actin (LOC646821), mRNA.
ILMN_2359789	NM_006908.3	RAC1	5879	RAC1	-2.60419	0.56918	0.120354	0.105754	7.61289e-06	0.000124755	-1.43945	0.534316	0.291368	0.276604	0.00755839	0.103138	ras-related C3 botulinum toxin substrate 1 (rho family, small GTP binding protein Rac1) (RAC1), transcript variant Rac1, mRNA.	MGC111543; MIG5; TC-25; p21-Rac1
ILMN_2327346	NM_032627.2	SSBP4	170463	SSBP4	-2.03146	0.444535	0.120186	0.105583	7.79843e-06	0.000127487	-1.12953	0.416868	0.291608	0.27685	0.00722305	0.0998266	single stranded DNA binding protein 4 (SSBP4), transcript variant 1, mRNA.	MGC3181
ILMN_1750429	NM_003684.3	MKNK1	8569	MKNK1	-1.58743	0.347396	0.120175	0.105572	7.81076e-06	0.000127644	-0.696116	0.336761	0.282709	0.267765	0.0397979	0.277652	MAP kinase interacting serine/threonine kinase 1 (MKNK1), transcript variant 1, mRNA.	MNK1
ILMN_1790953	NM_001281.2	TBCB	1155	TBCB	-1.75942	0.385082	0.120158	0.105555	7.82944e-06	0.000127861	-0.835359	0.36931	0.285177	0.270285	0.0245959	0.214575	tubulin folding cofactor B (TBCB), mRNA.	CG22; MGC14625; CKAPI; CKAP1
ILMN_1811050	NM_018084.3	CCDC88A	55704	CCDC88A	-2.12873	0.46602	0.120125	0.105522	7.86618e-06	0.000128372	-1.10698	0.44124	0.288595	0.273774	0.0127752	0.143182	coiled-coil domain containing 88A (CCDC88A), mRNA.	GRDN; HkRP1; KIAA1212; GIV; APE; DKFZp686D0630
ILMN_1718771	NM_152499.1	CCDC24	149473	CCDC24	-2.31731	0.507613	0.12004	0.105435	7.96265e-06	0.000129768	-1.2059	0.480521	0.288606	0.273786	0.0127474	0.143031	coiled-coil domain containing 24 (CCDC24), mRNA.	RP5-1198O20.2; MGC45441
ILMN_1661137	NM_152550.2	SH3RF2	153769	SH3RF2	-1.63326	0.357839	0.120013	0.105407	7.99356e-06	0.000130182	-0.837232	0.339455	0.287985	0.273152	0.0143478	0.154045	SH3 domain containing ring finger 2 (SH3RF2), mRNA.	FLJ23654; MGC149789; MGC149788; RNF158; MGC90410
ILMN_1811313	NM_003062.1	SLIT3	6586	SLIT3	-1.15344	0.252751	0.119992	0.105386	8.01764e-06	0.000130529	-0.486743	0.246162	0.281641	0.266675	0.049149	0.310423	slit homolog 3 (Drosophila) (SLIT3), mRNA.	MEGF5; SLIT1; Slit-3; SLIL2; slit2; FLJ10764
ILMN_1791569	NM_032242.2	PLXNA1	5361	PLXNA1	-2.13969	0.468879	0.119988	0.105382	8.0221e-06	0.000130557	-1.04915	0.447566	0.286279	0.27141	0.0198886	0.188954	plexin A1 (PLXNA1), mRNA.	NOV; PLXN1; NOVP; PLEXIN-A1
ILMN_2410986	NM_139276.2	STAT3	6774	STAT3	-1.52045	0.333196	0.119982	0.105376	8.02839e-06	0.000130614	-0.785639	0.315708	0.288302	0.273475	0.0135076	0.148247	signal transducer and activator of transcription 3 (acute-phase response factor) (STAT3), transcript variant 1, mRNA.	APRF; FLJ20882; MGC16063
ILMN_1802106	NM_021822.1	APOBEC3G	60489	APOBEC3G	-2.36502	0.518498	0.119923	0.105316	8.09683e-06	0.000131637	-1.33248	0.485151	0.292186	0.277439	0.00647948	0.0931459	apolipoprotein B mRNA editing enzyme, catalytic polypeptide-like 3G (APOBEC3G), mRNA.	CEM15; FLJ12740; bK150C2.7; ARP9; dJ494G10.1; MDS019
ILMN_1798372	NR_001446.2	ANXA2P3	305	ANXA2P3	-2.29671	0.5037	0.119874	0.105266	8.15419e-06	0.000132387	-1.32933	0.469425	0.293543	0.278826	0.00502122	0.0787641	annexin A2 pseudogene 3 (ANXA2P3), non-coding RNA.	ANX2L3; LIP2; LPC2C; ANX2P3
ILMN_2100209	NM_001001435.2	CCL4L1	9560		-1.46842	0.322301	0.119762	0.105152	8.28539e-06	0.000134287	-0.911092	0.297277	0.297435	0.282798	0.00242721	0.0490986	chemokine (C-C motif) ligand 4-like 1 (CCL4L1), mRNA.	LAG-1; AT744.2; LAG1; SCYA4L; CCL4L
ILMN_1734138	NM_014760.2	TATDN2	9797	TATDN2	-2.56609	0.563256	0.119755	0.105145	8.29377e-06	0.000134377	-1.05316	0.55028	0.280913	0.265932	0.0568263	0.334585	TatD DNase domain containing 2 (TATDN2), mRNA.	MGC126819; KIAA0218; MGC126825
ILMN_1703142	NM_001005416.1	MARCH2	51257	MARCH2	-1.24527	0.273443	0.119701	0.10509	8.35786e-06	0.000135322	-0.83207	0.249456	0.302283	0.287747	0.000986317	0.0264738	membrane-associated ring finger (C3HC4) 2 (MARCH2), transcript variant 3, mRNA.	HSPC240; RNF172; MARCH-II
ILMN_2313730	NM_175744.4	RHOC	389	RHOC	-1.53063	0.336398	0.119579	0.104966	8.50556e-06	0.000137572	-1.01129	0.307373	0.301445	0.286892	0.00115201	0.0293709	ras homolog gene family, member C (RHOC), transcript variant 1, mRNA.	H9; ARHC; MGC61427; MGC1448; RHOH9; ARH9
ILMN_1764043	NM_153712.4	TTL	150465	TTL	-2.10049	0.462011	0.119467	0.104852	8.64219e-06	0.000139449	-0.845887	0.452195	0.28043	0.265439	0.0626141	0.350966	tubulin tyrosine ligase (TTL), mRNA.	MGC46235
ILMN_1764788	NM_001066.2	TNFRSF1B	7133	TNFRSF1B	-1.07864	0.237374	0.119394	0.104778	8.73249e-06	0.000140762	-0.535724	0.225995	0.286641	0.271779	0.0185544	0.181424	tumor necrosis factor receptor superfamily, member 1B (TNFRSF1B), mRNA.	TNF-R-II; TNFR80; TNF-R75; p75; CD120b; TBPII; TNFBR; p75TNFR; TNFR2
ILMN_1703471	NM_007348.2	ATF6	22926	ATF6	-2.16303	0.476047	0.119385	0.104769	8.74399e-06	0.000140899	-1.39548	0.436441	0.299767	0.285178	0.00157315	0.0365965	activating transcription factor 6 (ATF6), mRNA.
ILMN_1653828	NM_018223.1	CHFR	55743	CHFR	-2.29006	0.504254	0.119316	0.104699	8.83037e-06	0.000142146	-1.05921	0.484707	0.284181	0.269268	0.0298371	0.23738	checkpoint with forkhead and ring finger domains (CHFR), mRNA.	RNF116; RNF196; FLJ10796; FLJ33629
ILMN_2340217	NM_080921.2	PTPRC	5788	PTPRC	-2.47392	0.544845	0.119289	0.104671	8.86503e-06	0.000142606	-1.36538	0.510981	0.29103	0.27626	0.00805482	0.107097	protein tyrosine phosphatase, receptor type, C (PTPRC), transcript variant 2, mRNA.	LY5; CD45; T200; LCA; B220; GP180
ILMN_1788783	NM_012288.3	TRAM2	9697	TRAM2	-1.39216	0.306603	0.119289	0.104671	8.86502e-06	0.000142606	-0.564807	0.299717	0.280583	0.265596	0.0607105	0.345143	translocation associated membrane protein 2 (TRAM2), mRNA.	KIAA0057
ILMN_2148668	NM_001268.2	RCBTB2	1102	RCBTB2	-2.08932	0.460158	0.119284	0.104667	8.87065e-06	0.000142644	-1.18076	0.430083	0.292168	0.277422	0.00650089	0.093394	regulator of chromosome condensation (RCC1) and BTB (POZ) domain containing protein 2 (RCBTB2), mRNA.	CHC1L
ILMN_1727041	NM_005243.2	EWSR1	2130	EWSR1	-1.77907	0.391834	0.119282	0.104665	8.87343e-06	0.000142644	-0.705297	0.384114	0.280052	0.265053	0.0675703	0.36532	Ewing sarcoma breakpoint region 1 (EWSR1), transcript variant EWS, mRNA.	EWS
ILMN_2173004	NM_016530.2	RAB8B	51762	RAB8B	-1.53687	0.338626	0.119226	0.104608	8.9445e-06	0.000143689	-0.72696	0.324477	0.284894	0.269996	0.0259801	0.221347	RAB8B, member RAS oncogene family (RAB8B), mRNA.	FLJ38125
ILMN_2371911	NM_001044390.1	MUC1	4582	MUC1	-3.34119	0.7362	0.119223	0.104604	8.94899e-06	0.000143713	-1.79067	0.693297	0.289682	0.274884	0.0103926	0.126043	mucin 1, cell surface associated (MUC1), transcript variant 5, mRNA.	PEMT; PUM; PEM; EMA; H23AG; MAM6; CD227
ILMN_1667430	NM_003676.2	DEGS1	8560	DEGS1	-1.34047	0.295601	0.11911	0.104489	9.09497e-06	0.000145809	-0.945624	0.267453	0.306083	0.291626	0.000487996	0.0163336	degenerative spermatocyte homolog 1, lipid desaturase (Drosophila) (DEGS1), transcript variant 1, mRNA.	MLD; MIG15; FADS7; DES1; DEGS; Des-1; MGC5079
ILMN_1662768	NM_178833.3	NHEDC2	133308	SLC9B2	-4.42395	0.975714	0.11909	0.104469	9.12096e-06	0.000146127	-1.63752	0.96393	0.278613	0.263584	0.0906535	0.421932	Na+/H+ exchanger domain containing 2 (NHEDC2), mRNA.	FLJ23984; NHA2
ILMN_1697925	NM_018690.2	APOB48R	55911	APOBR	-3.05698	0.674218	0.119091	0.10447	9.11901e-06	0.000146127	-1.85221	0.623689	0.295816	0.281145	0.0032826	0.0599643	apolipoprotein B48 receptor (APOB48R), mRNA.
ILMN_1684402	NM_139244.2	STXBP5	134957	STXBP5	-2.89581	0.63881	0.119061	0.10444	9.15845e-06	0.000146678	-1.54644	0.601773	0.289489	0.274687	0.0107802	0.128715	syntaxin binding protein 5 (tomosyn) (STXBP5), mRNA.	LLGL3; MGC141968; FLJ30922; LGL3; MGC141942; Nbla04300
ILMN_3275771	XR_038054.1	LOC642567	642567	FTH1	-1.27718	0.281813	0.119027	0.104405	9.20308e-06	0.000147343	-0.609604	0.26963	0.285163	0.270271	0.024662	0.2148	PREDICTED: misc_RNA (LOC642567), miscRNA.
ILMN_1673030	NM_004072.1	CMKLR1	1240	CMKLR1	-3.38599	0.747156	0.119022	0.1044	9.21016e-06	0.000147356	-1.70976	0.709353	0.287193	0.272343	0.0166921	0.16999	chemokine-like receptor 1 (CMKLR1), mRNA.	MGC126105; ChemR23; DEZ; MGC126106
ILMN_1748352	NM_001333.2	CTSL2	1515	CTSL2	-2.69882	0.595608	0.119002	0.10438	9.23576e-06	0.000147616	-1.66445	0.549506	0.29682	0.28217	0.00272194	0.052954	cathepsin L2 (CTSL2), mRNA.	CTSV; CATL2; CTSU; MGC125957
ILMN_1815264	NM_012265.1	RHBDD3	25807	RHBDD3	-2.86533	0.632428	0.118986	0.104363	9.257e-06	0.000147856	-2.00868	0.572688	0.305536	0.291068	0.000539907	0.0174415	rhomboid domain containing 3 (RHBDD3), mRNA.	HS984G1A; C22orf3; PTAG
ILMN_2396956	NM_007200.3	AKAP13	11214	AKAP13	-1.4252	0.314596	0.118973	0.104351	9.27378e-06	0.000148074	-0.61136	0.30522	0.281942	0.266983	0.0463004	0.302054	A kinase (PRKA) anchor protein 13 (AKAP13), transcript variant 2, mRNA.	HA-3; FLJ11952; BRX; FLJ43341; c-lbc; PROTO-LB; Ht31; LBC; AKAP-Lbc; PROTO-LBC
ILMN_1723198	NM_004936.3	CDKN2B	1030	CDKN2B	-0.67596	0.149241	0.118945	0.104322	9.31135e-06	0.000148576	-0.307214	0.143707	0.28358	0.268655	0.0335453	0.252747	cyclin-dependent kinase inhibitor 2B (p15, inhibits CDK4) (CDKN2B), transcript variant 1, mRNA.	TP15; p15INK4b; INK4B; P15; MTS2; CDK4I
ILMN_1663213	NM_032817.3	ITIH5	80760	ITIH5	-2.44292	0.539475	0.118915	0.104291	9.35204e-06	0.000149172	-1.53239	0.496454	0.297814	0.283185	0.00226177	0.0467517	inter-alpha (globulin) inhibitor H5 (ITIH5), transcript variant 2, mRNA.	DKFZp686F0145; pp14776; MGC10848
ILMN_1658407	NM_014096.2	SLC43A3	29015	SLC43A3	-1.53317	0.338652	0.118882	0.104258	9.39517e-06	0.000149658	-0.665267	0.328028	0.282239	0.267286	0.0436566	0.292	solute carrier family 43, member 3 (SLC43A3), mRNA.	FOAP-13; PRO1659; DKFZp762A227; SEEEG-1; EEG1
ILMN_1759513	NM_005168.3	RND3	390	RND3	-1.09989	0.242947	0.118882	0.104258	9.39499e-06	0.000149658	-0.62261	0.226919	0.292142	0.277395	0.00653281	0.093625	Rho family GTPase 3 (RND3), mRNA.	RhoE; Rho8; memB; ARHE
ILMN_1659189	NM_032310.3	C9orf89	84270	C9orf89	-2.58827	0.571788	0.118862	0.104238	9.42188e-06	0.000150033	-1.62444	0.526127	0.297829	0.2832	0.00225548	0.0466838	chromosome 9 open reading frame 89 (C9orf89), mRNA.	MGC11115; BinCARD; MGC110898; bA370F5.1
ILMN_1727524	NM_003816.2	ADAM9	8754	ADAM9	-2.05749	0.454632	0.118831	0.104206	9.46374e-06	0.000150549	-0.872888	0.441594	0.281633	0.266668	0.0492232	0.310669	ADAM metallopeptidase domain 9 (meltrin gamma) (ADAM9), transcript variant 1, mRNA.	MDC9; KIAA0021; Mltng; MCMP
ILMN_1671693	NM_015476.2	C18orf10	25941	C18orf10	-1.36256	0.301077	0.118831	0.104206	9.46382e-06	0.000150549	-0.726255	0.283621	0.289354	0.274549	0.0110607	0.130808	chromosome 18 open reading frame 10 (C18orf10), mRNA.	L17; DKFZP586M1523; HsT3006; PGs2; HMFN0601; DKFZp586M1523
ILMN_1768553	XM_944265.1	LOC283050	283050	LOC283050	-1.85488	0.410016	0.11878	0.104154	9.53365e-06	0.000151558	-0.985354	0.386403	0.289198	0.274389	0.0113927	0.133335	PREDICTED: hypothetical protein LOC283050 (LOC283050), mRNA.
ILMN_1758146	NM_001040023.1	SIRPA	140885	SIRPA	-1.14225	0.252502	0.118774	0.104148	9.54196e-06	0.000151588	-0.58759	0.239032	0.287869	0.273033	0.0146707	0.155988	signal-regulatory protein alpha (SIRPA), transcript variant 2, mRNA.	SIRPalpha2; BIT; SHPS1; MFR; SIRP; SHPS-1; CD172A; SIRP-ALPHA-1; SIRPalpha; PTPNS1; P84; MYD-1
ILMN_1735764	NM_000867.3	HTR2B	3357	HTR2B	-1.31103	0.289945	0.118711	0.104084	9.62756e-06	0.000152758	-0.916629	0.262619	0.305206	0.290731	0.000573927	0.018217	5-hydroxytryptamine (serotonin) receptor 2B (HTR2B), mRNA.	5-HT2B; 5-HT(2B)
ILMN_1720048	NM_002982.3	CCL2	6347	CCL2	-0.492863	0.10903	0.118674	0.104046	9.67953e-06	0.000153464	-0.272822	0.102141	0.291014	0.276244	0.00807899	0.107252	chemokine (C-C motif) ligand 2 (CCL2), mRNA.	SMC-CF; MCP1; MCAF; HSMCR30; GDCF-2; SCYA2; HC11; MGC9434; MCP-1; GDCF-2 HC11
ILMN_1811719	NM_000260.2	MYO7A	4647	MYO7A	-2.86949	0.634906	0.118647	0.104018	9.71697e-06	0.000153955	-1.46321	0.601671	0.287496	0.272652	0.0157522	0.163867	myosin VIIA (MYO7A), mRNA.	USH1B; DFNA11; NSRD2; MYU7A; DFNB2
ILMN_1806908	NM_002738.5	PRKCB1	5579	PRKCB	-0.663257	0.146974	0.118439	0.103808	1.0009e-05	0.00015821	-0.326392	0.139923	0.286123	0.271251	0.0204939	0.191967	protein kinase C, beta 1 (PRKCB1), transcript variant 2, mRNA.	PRKCB2; PRKCB; MGC41878; PKCB; PKC-beta
ILMN_1672662	NM_005415.3	SLC20A1	6574	SLC20A1	-1.49984	0.332403	0.118421	0.103789	1.00354e-05	0.000158533	-0.739735	0.316351	0.286201	0.27133	0.0201917	0.190456	solute carrier family 20 (phosphate transporter), member 1 (SLC20A1), mRNA.	Glvr-1; PiT-1; FLJ41426; GLVR1; PIT1; DKFZp686J2397
ILMN_1767665	NM_001008397.1	LOC493869	493869	GPX8	-1.0634	0.235785	0.118357	0.103724	1.01269e-05	0.000159782	-0.626446	0.218858	0.294038	0.279331	0.00457672	0.0742155	similar to RIKEN cDNA 2310016C16 (LOC493869), mRNA.	UNQ847
ILMN_1690464	NM_153226.1	TMEM20	159371	SLC35G1	-1.73461	0.384713	0.11832	0.103687	1.01802e-05	0.000160381	-1.06233	0.355092	0.296185	0.281523	0.00306372	0.0574373	transmembrane protein 20 (TMEM20), mRNA.	C10orf60; FLJ33990
ILMN_1686367	NM_006597.3	HSPA8	3312	HSPA8	-0.840321	0.186497	0.118228	0.103593	1.03149e-05	0.000162286	-0.428798	0.176622	0.287438	0.272593	0.0159285	0.164985	heat shock 70kDa protein 8 (HSPA8), transcript variant 1, mRNA.	MGC131511; HSC54; HSPA10; MGC29929; HSC70; HSP71; HSP73; LAP1; HSC71; NIP71
ILMN_2308338	NM_001003943.1	BMF	90427	BMF	-3.32275	0.737678	0.118184	0.103548	1.03808e-05	0.000163214	-1.92122	0.686437	0.293014	0.278285	0.00554555	0.0845764	Bcl2 modifying factor (BMF), transcript variant 4, mRNA.	FLJ00065
ILMN_1742450	NM_003190.3	TAPBP	6892	TAPBP	-1.21271	0.269293	0.118153	0.103516	1.04268e-05	0.000163883	-0.519826	0.260929	0.281815	0.266853	0.0474809	0.305502	TAP binding protein (tapasin) (TAPBP), transcript variant 1, mRNA.	TAPA; NGS17; TPSN; TPN
ILMN_1667050	NM_002764.2	PRPS1	5631	PRPS1	-2.7355	0.607642	0.118108	0.103471	1.04942e-05	0.000164778	-1.61732	0.563595	0.294157	0.279452	0.00447576	0.0733236	phosphoribosyl pyrophosphate synthetase 1 (PRPS1), mRNA.	PRSI; KIAA0967; PRS I
ILMN_1761833	NM_014585.4	SLC40A1	30061	SLC40A1	-1.42633	0.317107	0.11799	0.103351	1.06722e-05	0.000167295	-0.719157	0.300715	0.286931	0.272075	0.0175513	0.175231	solute carrier family 40 (iron-regulated transporter), member 1 (SLC40A1), mRNA.	IREG1; HFE4; MST079; FPN1; MTP1; MSTP079; SLC11A3
ILMN_1730568	NM_017740.1	ZDHHC7	55625	ZDHHC7	-1.67096	0.371695	0.117916	0.103276	1.07852e-05	0.000168899	-1.00836	0.343684	0.295217	0.280534	0.00367099	0.064782	zinc finger, DHHC-type containing 7 (ZDHHC7), mRNA.	ZNF370; FLJ10792; FLJ20279
ILMN_1712950	NM_005022.2	PFN1	5216	PFN1	-1.04619	0.232868	0.117829	0.103187	1.09208e-05	0.00017074	-0.573592	0.218246	0.290362	0.275578	0.00913767	0.116234	profilin 1 (PFN1), mRNA.
ILMN_1776905	NM_001013629.1	FAM23B	340843	TMEM236	-3.05179	0.679728	0.11774	0.103096	1.10604e-05	0.000172809	-1.54831	0.643837	0.287116	0.272265	0.0169388	0.171506	family with sequence similarity 23, member B (FAM23B), mRNA.	bA162I21.2
ILMN_2085012	NM_014020.2	TMEM176B	28959	TMEM176B	-2.60433	0.580297	0.117685	0.103041	1.11467e-05	0.000174042	-1.23358	0.554692	0.284679	0.269777	0.0270859	0.226605	transmembrane protein 176B (TMEM176B), mRNA.	LR8; FLJ26014; MGC110857
ILMN_1679838	NM_001006612.1	WBP5	51186	WBP5	-1.6058	0.357834	0.117675	0.10303	1.11638e-05	0.000174251	-0.982171	0.330164	0.2959	0.281232	0.00323107	0.0594592	WW domain binding protein 5 (WBP5), transcript variant 2, mRNA.	DKFZp313K1940; TCEAL9
ILMN_1699545	NM_004716.2	PCSK7	9159	PCSK7	-2.37262	0.528893	0.117627	0.102982	1.12391e-05	0.000175311	-1.25081	0.498273	0.288617	0.273796	0.0127226	0.142854	proprotein convertase subtilisin/kexin type 7 (PCSK7), mRNA.	SPC7; PC8; LPC; PC7
ILMN_1812967	NM_006586.3	CNPY3	10695	CNPY3	-3.16591	0.705835	0.117607	0.102961	1.12721e-05	0.000175767	-1.88891	0.653521	0.294496	0.279798	0.00420065	0.0705739	canopy 3 homolog (zebrafish) (CNPY3), mRNA.	PRAT4A; TNRC5; CAG4A; ERDA5
ILMN_3280402	XM_001725190.1	LOC100132510	100132510	GLRX	-2.74455	0.612232	0.117532	0.102885	1.13939e-05	0.000177025	-1.80788	0.55889	0.300439	0.285864	0.00138864	0.0335929	PREDICTED: similar to hCG1979388 (LOC100132510), mRNA.
ILMN_1806408	NM_001033859.1	ACADVL	37	ACADVL	-1.44061	0.321344	0.117538	0.102891	1.13835e-05	0.000177025	-1.09256	0.287598	0.311348	0.297001	0.000184242	0.00807556	acyl-Coenzyme A dehydrogenase, very long chain (ACADVL), nuclear gene encoding mitochondrial protein, transcript variant 2, mRNA.	ACAD6; VLCAD; LCACD
ILMN_2393765	NM_020070.2	IGLL1	3543	IGLL1	-0.35472	0.0791382	0.117514	0.102867	1.14219e-05	0.000177401	-0.191844	0.0742839	0.289679	0.27488	0.0104	0.126052	immunoglobulin lambda-like polypeptide 1 (IGLL1), transcript variant 1, mRNA.	IGO; IGVPB; IGLL; CD179b; IGL1; VPREB2; IGL5; 14.1; IGLJ14.1
ILMN_1699598	NM_004068.3	AP2M1	1173	AP2M1	-1.60441	0.358009	0.11749	0.102843	1.14614e-05	0.000177898	-0.813364	0.339031	0.287036	0.272183	0.0171999	0.173443	adaptor-related protein complex 2, mu 1 subunit (AP2M1), transcript variant 1, mRNA.	AP50; mu2; CLAPM1
ILMN_1805750	NM_021034.2	IFITM3	10410	IFITM3	-1.26087	0.28135	0.117491	0.102844	1.14601e-05	0.000177898	-0.74734	0.260714	0.294106	0.2794	0.00451886	0.0737711	interferon induced transmembrane protein 3 (1-8U) (IFITM3), mRNA.	1-8U; IP15
ILMN_1736256	NM_004343.2	CALR	811	CALR	-1.36994	0.305761	0.117458	0.10281	1.15146e-05	0.000178606	-0.720112	0.288115	0.288459	0.273635	0.0131098	0.14578	calreticulin (CALR), mRNA.	FLJ26680; cC1qR; RO; SSA
ILMN_1789130	NM_021233.2	DNASE2B	58511	DNASE2B	-1.27062	0.283645	0.117433	0.102785	1.15555e-05	0.000179123	-0.683036	0.266445	0.289396	0.274592	0.0109724	0.130253	deoxyribonuclease II beta (DNASE2B), transcript variant 1, mRNA.	DLAD
ILMN_2072296	NM_001827.1	CKS2	1164	CKS2	-1.55705	0.347631	0.117416	0.102768	1.15832e-05	0.000179494	-0.918949	0.322306	0.293857	0.279145	0.00473508	0.0758351	CDC28 protein kinase regulatory subunit 2 (CKS2), mRNA.	CKSHS2
ILMN_1782633	NM_001031827.1	BOLA2	552900		-1.41409	0.315722	0.117412	0.102763	1.15903e-05	0.000179546	-0.669725	0.301675	0.284629	0.269725	0.0273523	0.227827	bolA homolog 2 (E. coli) (BOLA2), mRNA.	BOLA2A; My016
ILMN_1743783	NM_001099225.1	CCDC43	124808	CCDC43	-3.77862	0.843878	0.117375	0.102726	1.16513e-05	0.000180373	-2.31376	0.778303	0.295867	0.281198	0.00325118	0.0596651	coiled-coil domain containing 43 (CCDC43), transcript variant 2, mRNA.	FLJ31795
ILMN_1716596	NM_003580.2	NSMAF	8439	NSMAF	-1.5966	0.356742	0.117309	0.102659	1.17615e-05	0.000181959	-0.994238	0.328218	0.296823	0.282174	0.00272013	0.052954	neutral sphingomyelinase (N-SMase) activation associated factor (NSMAF), mRNA.	FAN
ILMN_1723884	NM_001660.2	ARF4	378	ARF4	-1.08208	0.241972	0.117201	0.102549	1.19442e-05	0.000184379	-0.589039	0.226845	0.289888	0.275095	0.00999456	0.123384	ADP-ribosylation factor 4 (ARF4), mRNA.	ARF2
ILMN_1717313	NM_004556.2	NFKBIE	4794	NFKBIE	-3.52121	0.788016	0.117096	0.102442	1.21253e-05	0.000187036	-1.93743	0.737573	0.290341	0.275556	0.00917499	0.116531	nuclear factor of kappa light polypeptide gene enhancer in B-cells inhibitor, epsilon (NFKBIE), mRNA.	IKBE
ILMN_1732767	NM_002813.4	PSMD9	5715	PSMD9	-2.01276	0.450764	0.116998	0.102343	1.22953e-05	0.000189474	-0.859794	0.436102	0.281574	0.266607	0.0498106	0.312805	proteasome (prosome, macropain) 26S subunit, non-ATPase, 9 (PSMD9), mRNA.	MGC8644; p27
ILMN_1676005	NM_002264.1	KPNA1	3836	KPNA1	-1.81287	0.406098	0.116965	0.102309	1.2354e-05	0.000190316	-1.28107	0.366941	0.305223	0.290749	0.000572115	0.0181839	karyopherin alpha 1 (importin alpha 5) (KPNA1), mRNA.	SRP1; RCH2; NPI-1; IPOA5
ILMN_2382657	NM_001080156.1	ARHGAP9	64333	ARHGAP9	-1.1996	0.268861	0.116894	0.102237	1.24797e-05	0.00019219	-0.585679	0.255688	0.285557	0.270673	0.0228544	0.204944	Rho GTPase activating protein 9 (ARHGAP9), transcript variant 3, mRNA.	10C; RGL1; FLJ16525; MGC1295
ILMN_1734229	NM_032802.3	SPPL2A	84888	SPPL2A	-1.49992	0.336228	0.116872	0.102214	1.25192e-05	0.000192735	-0.856543	0.313012	0.292028	0.277278	0.00667487	0.0949166	signal peptide peptidase-like 2A (SPPL2A), mRNA.	PSL2; IMP3
ILMN_1703891	NM_015130.2	TBC1D9	23158	TBC1D9	-1.3165	0.295246	0.11681	0.102151	1.26298e-05	0.000194374	-0.753335	0.274764	0.292111	0.277363	0.00657152	0.0940374	TBC1 domain family, member 9 (with GRAM domain) (TBC1D9), mRNA.	KIAA0882; MDR1
ILMN_1791576	NM_014918.3	CHSY1	22856	CHSY1	-1.36317	0.305739	0.116798	0.10214	1.26508e-05	0.000194634	-0.56351	0.296871	0.280736	0.265752	0.0588743	0.339557	chondroitin sulfate synthase 1 (CHSY1), mRNA.	CSS1; KIAA0990
ILMN_1755235	NM_015171.2	XPO6	23214	XPO6	-1.68899	0.378881	0.116775	0.102116	1.26925e-05	0.00019497	-0.853483	0.358619	0.286771	0.271912	0.0180987	0.178677	exportin 6 (XPO6), mRNA.	EXP6; KIAA0370; RANBP20; FLJ22519
ILMN_1780582	NM_001040280.1	CD83	9308	CD83	-0.878956	0.197174	0.116773	0.102114	1.26961e-05	0.00019497	-0.466952	0.185374	0.288743	0.273925	0.0124207	0.140701	CD83 molecule (CD83), transcript variant 2, mRNA.	HB15; BL11
ILMN_1723020	NM_005921.1	MAP3K1	4214	MAP3K1	-1.27721	0.286581	0.116741	0.102082	1.27542e-05	0.00019578	-0.710353	0.267735	0.290742	0.275965	0.00850565	0.110726	mitogen-activated protein kinase kinase kinase 1 (MAP3K1), mRNA.	MAPKKK1; MEKK1; MEKK
ILMN_1715416	NM_015354.1	NUP188	23511	NUP188	-2.17938	0.489064	0.116726	0.102066	1.27817e-05	0.000196011	-1.27989	0.453458	0.293393	0.278672	0.00516457	0.0804258	nucleoporin 188kDa (NUP188), mRNA.	KIAA0169; FLJ21639
ILMN_1725427	NM_004048.2	B2M	567	B2M	-2.0392	0.457671	0.116708	0.102047	1.28153e-05	0.000196462	-1.14513	0.42699	0.291181	0.276414	0.00782955	0.105406	beta-2-microglobulin (B2M), mRNA.
ILMN_1786357	NM_015242.3	CENTD2	116985	ARAP1	-2.95938	0.664419	0.116662	0.102001	1.28998e-05	0.000197694	-1.88715	0.608947	0.298029	0.283405	0.00217306	0.0454746	centaurin, delta 2 (CENTD2), transcript variant 2, mRNA.	ARAP1; KIAA0782
ILMN_1673352	NM_006435.2	IFITM2	10581	IFITM2	-1.2285	0.275854	0.116642	0.101981	1.29356e-05	0.000198114	-0.574327	0.263727	0.284085	0.26917	0.0304004	0.239586	interferon induced transmembrane protein 2 (1-8D) (IFITM2), mRNA.	1-8D
ILMN_1788099	NM_012321.2	LSM4	25804	LSM4	-1.56247	0.350865	0.116635	0.101974	1.29485e-05	0.000198247	-0.902556	0.326041	0.292528	0.277789	0.00607602	0.0896597	LSM4 homolog, U6 small nuclear RNA associated (S. cerevisiae) (LSM4), mRNA.	YER112W
ILMN_1731137	NM_005783.3	TXNDC9	10190	TXNDC9	-1.96104	0.440379	0.116632	0.10197	1.29553e-05	0.000198288	-0.903782	0.421783	0.283643	0.268719	0.033138	0.250676	thioredoxin domain containing 9 (TXNDC9), mRNA.	APACD
ILMN_1686985	NM_000252.1	MTM1	4534	MTM1	-3.34214	0.750546	0.116627	0.101966	1.29636e-05	0.00019835	-2.11413	0.688642	0.297525	0.28289	0.00238683	0.04853	myotubularin 1 (MTM1), mRNA.	CNM; XLMTM; MTMX
ILMN_1724148	NM_032790.2	ORAI1	84876	ORAI1	-3.66752	0.824182	0.116535	0.101872	1.31346e-05	0.000200578	-1.94965	0.774575	0.288715	0.273897	0.0124867	0.141144	ORAI calcium release-activated calcium modulator 1 (ORAI1), mRNA.	ORAI1; TMEM142A; ORAT1; FLJ14466; CRACM1
ILMN_2366246	NM_032985.4	SEC23B	10483	SEC23B	-1.84136	0.413857	0.116516	0.101853	1.31701e-05	0.00020099	-1.02729	0.386383	0.290826	0.276052	0.00837115	0.10976	Sec23 homolog B (S. cerevisiae) (SEC23B), transcript variant 2, mRNA.
ILMN_1665887	NM_025234.1	WDR61	80349	WDR61	-2.02554	0.455316	0.116498	0.101834	1.32047e-05	0.000201387	-1.35366	0.414523	0.300997	0.286435	0.00125186	0.0313257	WD repeat domain 61 (WDR61), mRNA.	REC14
ILMN_1776094	NM_024664.2	PPCS	79717	PPCS	-2.03847	0.458312	0.116472	0.101807	1.32547e-05	0.000201955	-1.22638	0.423419	0.294595	0.279899	0.00412365	0.0697984	phosphopantothenoylcysteine synthetase (PPCS), transcript variant 1, mRNA.	MGC138220; FLJ11838; RP11-163G10.1; MGC117357
ILMN_1696601	NM_006295.2	VARS	7407	VARS	-1.83008	0.411691	0.116396	0.101731	1.33977e-05	0.000203713	-1.13087	0.378906	0.296065	0.2814	0.00313324	0.058317	valyl-tRNA synthetase (VARS), nuclear gene encoding mitochondrial protein, mRNA.	G7A; VARS2
ILMN_1665033	NM_000908.2	NPR3	4883	NPR3	-0.537022	0.120896	0.116299	0.101631	1.3586e-05	0.000206117	-0.292656	0.113206	0.289717	0.274919	0.0103244	0.125648	natriuretic peptide receptor C/guanylate cyclase C (atrionatriuretic peptide receptor C) (NPR3), mRNA.	NPRC; ANPRC
ILMN_1679322	NM_022071.2	SH2D4A	63898	SH2D4A	-2.73304	0.615296	0.116293	0.101625	1.35977e-05	0.000206184	-1.59044	0.57099	0.2928	0.278067	0.00577284	0.0867283	SH2 domain containing 4A (SH2D4A), mRNA.	SH2A; FLJ20967
ILMN_1806040	NM_001071.1	TYMS	7298	TYMS	-1.8073	0.406894	0.116289	0.101621	1.36049e-05	0.000206227	-1.0339	0.378484	0.291953	0.277202	0.00676901	0.0957159	thymidylate synthetase (TYMS), mRNA.	TS; TSase; TMS; HsT422; MGC88736
ILMN_3251155	NM_005016.5	PCBP2	5094	PCBP2	-2.27482	0.512215	0.116272	0.101604	1.36385e-05	0.000206671	-1.13743	0.485183	0.286282	0.271413	0.019878	0.188924	poly(rC) binding protein 2 (PCBP2), transcript variant 1, mRNA.
ILMN_1807106	NM_005566.1	LDHA	3939	LDHA	-1.24021	0.279315	0.116242	0.101574	1.36956e-05	0.000207404	-0.698566	0.260355	0.2912	0.276433	0.00780118	0.105174	lactate dehydrogenase A (LDHA), mRNA.	LDH-M; PIG19; LDH1
ILMN_1660260	XM_928897.2	LOC645927	645927	MCFD2	-1.34236	0.302357	0.116227	0.101559	1.37253e-05	0.000207719	-0.85525	0.277058	0.297818	0.283189	0.00226021	0.0467517	PREDICTED: similar to multiple coagulation factor deficiency 2 (LOC645927), mRNA.
ILMN_1794512	NM_001125.2	ADPRH	141	ADPRH	-3.04595	0.686671	0.116112	0.101441	1.39531e-05	0.000210965	-1.74132	0.638673	0.291872	0.277119	0.00687385	0.0964379	ADP-ribosylarginine hydrolase (ADPRH), mRNA.	ARH1
ILMN_1682206	NM_024523.5	GCC1	79571	GCC1	-2.68857	0.606165	0.116098	0.101428	1.39801e-05	0.000211238	-1.76016	0.553297	0.299478	0.284883	0.00165991	0.0379074	GRIP and coiled-coil domain containing 1 (GCC1), mRNA.	FLJ22035; GCC1P; GCC88; MGC20706
ILMN_1749011	NM_018090.3	NECAP2	55707	NECAP2	-2.33862	0.527475	0.116045	0.101374	1.40862e-05	0.000212705	-1.14632	0.500786	0.285537	0.270652	0.0229459	0.20557	NECAP endocytosis associated 2 (NECAP2), mRNA.	FLJ10420; RP4-798A10.1
ILMN_2116714	NM_014437.3	SLC39A1	27173	SLC39A1	-2.17581	0.490763	0.116042	0.101371	1.40921e-05	0.000212726	-1.04669	0.467063	0.284902	0.270004	0.0259414	0.221217	solute carrier family 39 (zinc transporter), member 1 (SLC39A1), mRNA.	ZIP1; ZIRTL
ILMN_1784040	NM_004851.1	NAPSA	9476	NAPSA	-4.13203	0.932155	0.11602	0.101348	1.41365e-05	0.000213329	-2.60342	0.855352	0.297071	0.282427	0.00259723	0.0514281	napsin A aspartic peptidase (NAPSA), mRNA.	Kdap; NAP1; SNAPA; NAPA; KAP
ILMN_2145116	NM_198282.1	TMEM173	340061	TMEM173	-1.34081	0.302557	0.115984	0.101312	1.42091e-05	0.000214219	-0.506808	0.296386	0.278726	0.263699	0.0885658	0.417183	transmembrane protein 173 (TMEM173), nuclear gene encoding mitochondrial protein, mRNA.	FLJ38577
ILMN_1760320	NM_002074.2	GNB1	2782	GNB1	-2.2937	0.517705	0.115952	0.101279	1.42744e-05	0.000215135	-1.0259	0.497191	0.282664	0.267719	0.0401513	0.278975	guanine nucleotide binding protein (G protein), beta polypeptide 1 (GNB1), mRNA.
ILMN_1751227	XM_379483.3	LOC401321	401321	LOC401321	-3.50803	0.792009	0.115915	0.101241	1.43499e-05	0.000216135	-1.87836	0.743077	0.288872	0.274056	0.0121206	0.138529	PREDICTED: hypothetical LOC401321 (LOC401321), mRNA.
ILMN_1694240	NM_002755.2	MAP2K1	5604	MAP2K1	-1.18107	0.26674	0.11587	0.101196	1.44419e-05	0.000217451	-0.723402	0.245693	0.29539	0.28071	0.00355441	0.063363	mitogen-activated protein kinase kinase 1 (MAP2K1), mRNA.	PRKMK1; MKK1; MAPKK1; MEK1
ILMN_1666305	NM_005192.2	CDKN3	1033	CDKN3	-2.83101	0.639818	0.115778	0.101102	1.46337e-05	0.000220059	-1.92933	0.580665	0.302044	0.287503	0.00103103	0.0273327	cyclin-dependent kinase inhibitor 3 (CDK2-associated dual specificity phosphatase) (CDKN3), mRNA.	CDI1; KAP; MGC70625; FLJ25787; CIP2; KAP1
ILMN_1687921	NM_001005920.2	JMJD8	339123	JMJD8	-1.62785	0.367924	0.115769	0.101093	1.46528e-05	0.000220276	-0.798568	0.34914	0.285513	0.270627	0.0230527	0.206136	jumonji domain containing 8 (JMJD8), mRNA.	PP14397
ILMN_2169152	NM_002727.2	SRGN	5552	SRGN	-0.686843	0.155279	0.115735	0.101058	1.47235e-05	0.000221269	-0.313783	0.148684	0.28324	0.268307	0.0358592	0.262162	serglycin (SRGN), mRNA.	PRG1; PPG; PRG; FLJ12930; MGC9289
ILMN_1656368	NM_170726.1	ALDH4A1	8659	ALDH4A1	-0.740856	0.167525	0.115707	0.10103	1.47824e-05	0.000222012	-0.37902	0.158091	0.287014	0.27216	0.0172733	0.173788	aldehyde dehydrogenase 4 family, member A1 (ALDH4A1), nuclear gene encoding mitochondrial protein, transcript variant P5CDhS, mRNA.	P5CDh; P5CD; ALDH4; P5CDhL; P5CDhS
ILMN_1806841	NM_145004.5	ADAM32	203102	ADAM32	-3.58485	0.810725	0.11569	0.101012	1.48186e-05	0.000222274	-2.08206	0.752114	0.292528	0.277789	0.00607504	0.0896597	ADAM metallopeptidase domain 32 (ADAM32), mRNA.	FLJ29004; FLJ26299
ILMN_1708143	NM_001078171.1	FAM127A	8933	FAM127A	-1.53019	0.346052	0.115692	0.101014	1.48147e-05	0.000222274	-1.02675	0.314714	0.300941	0.286377	0.00126499	0.0315207	family with sequence similarity 127, member A (FAM127A), mRNA.	CXX1; MAR8C; MART8C; MGC117411; Mar8; Mart8
ILMN_1779356	NM_000546.3	TP53	7157	TP53	-3.20459	0.724934	0.115652	0.100974	1.48983e-05	0.000223186	-2.10606	0.661159	0.299552	0.28496	0.00163708	0.0376082	tumor protein p53 (TP53), mRNA.	p53; TRP53; LFS1
ILMN_1665455	NM_173475.1	DCUN1D3	123879	DCUN1D3	-1.06246	0.240347	0.115652	0.100974	1.48979e-05	0.000223186	-0.594301	0.224106	0.290721	0.275945	0.0085382	0.110915	DCN1, defective in cullin neddylation 1, domain containing 3 (S. cerevisiae) (DCUN1D3), mRNA.	MGC48972; FLJ41725; DKFZp686O0290; 44M2.4
ILMN_1709026	XM_937537.2	C6orf145	221749	C6orf145	-1.80442	0.408278	0.115624	0.100946	1.49579e-05	0.000224008	-1.06073	0.378113	0.293118	0.278391	0.0054386	0.0833214	PREDICTED: chromosome 6 open reading frame 145 (C6orf145), mRNA.
ILMN_1726720	NM_018454.5	NUSAP1	51203	NUSAP1	-1.9626	0.444343	0.115542	0.100863	1.51333e-05	0.000226492	-1.28736	0.40533	0.299386	0.28479	0.00168848	0.0381533	nucleolar and spindle associated protein 1 (NUSAP1), transcript variant 2, mRNA.	LNP; FLJ13421; SAPL; BM037; PRO0310p1; Q0310; ANKT
ILMN_1809483	NM_016246.2	HSD17B14	51171	HSD17B14	-2.79434	0.632962	0.115477	0.100797	1.52741e-05	0.000228382	-1.48455	0.594175	0.288446	0.273622	0.0131418	0.145933	hydroxysteroid (17-beta) dehydrogenase 14 (HSD17B14), mRNA.	DHRS10; retSDR3
ILMN_2125747	NR_002454.2	LOC606724	606724		-0.982599	0.222571	0.115479	0.100799	1.52697e-05	0.000228382	-0.476389	0.211444	0.28506	0.270165	0.0251612	0.21725	coronin, actin binding protein, 1A pseudogene (LOC606724), non-coding RNA.
ILMN_1671928	NM_000313.1	PROS1	5627	PROS1	-1.30374	0.295342	0.115467	0.100786	1.52978e-05	0.000228664	-0.567087	0.284387	0.281837	0.266875	0.0472764	0.3051	protein S (alpha) (PROS1), mRNA.	PROS; protein Sa; Protein S; PSA; PS23; PS25; PS24; PS 26; PS22; PS21
ILMN_2395240	NM_007194.3	CHEK2	11200	CHEK2	-2.6396	0.598111	0.115433	0.100752	1.53706e-05	0.000229608	-1.63429	0.549902	0.295853	0.281183	0.00326002	0.0596901	CHK2 checkpoint homolog (S. pombe) (CHEK2), transcript variant 1, mRNA.	HuCds1; CHK2; LFS2; RAD53; CDS1; PP1425
ILMN_1793831	NM_003789.3	TRADD	8717	TRADD	-3.34434	0.75812	0.115377	0.100695	1.54937e-05	0.000231227	-2.26628	0.688404	0.301482	0.286929	0.00114429	0.0292529	TNFRSF1A-associated via death domain (TRADD), mRNA.	MGC11078; Hs.89862
ILMN_2169439	NM_002210.2	ITGAV	3685	ITGAV	-1.1159	0.253082	0.115314	0.100631	1.56336e-05	0.000233169	-0.57694	0.238382	0.287332	0.272485	0.0162541	0.167214	integrin, alpha V (vitronectin receptor, alpha polypeptide, antigen CD51) (ITGAV), mRNA.	CD51; DKFZp686A08142; VNRA; MSK8
ILMN_1813685	NM_003929.1	RAB7L1	8934	RAB7L1	-1.41036	0.319954	0.115277	0.100593	1.57171e-05	0.00023434	-0.685666	0.303766	0.285115	0.270221	0.0248945	0.215752	RAB7, member RAS oncogene family-like 1 (RAB7L1), mRNA.	RAB7L; DKFZp686P1051
ILMN_1657483	NM_032985.4	SEC23B	10483	SEC23B	-1.54656	0.35098	0.115228	0.100543	1.58261e-05	0.000235817	-0.897806	0.325483	0.292372	0.27763	0.00625606	0.0913202	Sec23 homolog B (S. cerevisiae) (SEC23B), transcript variant 2, mRNA.
ILMN_2415911	NM_006375.2	ENOX2	10495	ENOX2	-3.34774	0.7599	0.115202	0.100516	1.58866e-05	0.000236569	-1.8583	0.708948	0.290257	0.275471	0.00932163	0.117908	ecto-NOX disulfide-thiol exchanger 2 (ENOX2), transcript variant 1, mRNA.	COVA1; tNOX; APK1
ILMN_3242448	NR_003711.1	SNORA11D	100124541		-3.78583	0.859483	0.11518	0.100494	1.59359e-05	0.000237078	-1.90538	0.812267	0.286302	0.271433	0.0198036	0.188638	small nucleolar RNA, H/ACA box 11D (SNORA11D), small nucleolar RNA.
ILMN_3247882	NM_024066.1	ERI3	79033	ERI3	-1.97507	0.448504	0.115147	0.100461	1.60107e-05	0.000238117	-1.15045	0.415699	0.292516	0.277777	0.00608894	0.0897014	ERI1 exoribonuclease family member 3 (ERI3), mRNA.	MGC2683; PINT1; FLJ22943
ILMN_1814917	NM_003260.3	TLE2	7089	TLE2	-1.15641	0.262813	0.115041	0.100352	1.62556e-05	0.000241228	-0.58095	0.24839	0.286208	0.271337	0.0201638	0.190307	transducin-like enhancer of split 2 (E(sp1) homolog, Drosophila) (TLE2), mRNA.	FLJ41188; GRG2; ESG2; ESG
ILMN_2308582	NM_007326.2	CYB5R3	1727	CYB5R3	-1.36701	0.310756	0.115007	0.100318	1.6334e-05	0.000242239	-0.726939	0.291516	0.288376	0.273551	0.0133181	0.146959	cytochrome b5 reductase 3 (CYB5R3), transcript variant S, mRNA.	DIA1; B5R
ILMN_1690125	NM_213636.1	PDLIM7	9260	PDLIM7	-2.72848	0.620333	0.11499	0.100301	1.6374e-05	0.000242756	-1.92909	0.559931	0.304343	0.28985	0.000673339	0.0202705	PDZ and LIM domain 7 (enigma) (PDLIM7), transcript variant 4, mRNA.
ILMN_1794825	NM_000382.2	ALDH3A2	224	ALDH3A2	-1.12922	0.256752	0.11498	0.100291	1.63967e-05	0.000242968	-0.722602	0.234912	0.29763	0.282997	0.00234076	0.0479031	aldehyde dehydrogenase 3 family, member A2 (ALDH3A2), transcript variant 2, mRNA.	DKFZp686E23276; FALDH; ALDH10; FLJ20851; SLS
ILMN_2352380	NM_001001188.3	TRPM2	7226	TRPM2	-3.39515	0.772188	0.114941	0.100251	1.64879e-05	0.000244062	-2.17164	0.706528	0.297589	0.282955	0.00235871	0.0481662	transient receptor potential cation channel, subfamily M, member 2 (TRPM2), transcript variant S, mRNA.	NUDT9H; KNP3; EREG1; TRPC7; NUDT9L1; MGC133383; LTRPC2
ILMN_3236239	NR_024618.1	LOC100129550	100129550	LOC100129550	-1.54795	0.352074	0.114938	0.100248	1.64959e-05	0.000244104	-0.930237	0.324882	0.294054	0.279347	0.00456325	0.0741631	hypothetical LOC100129550 (LOC100129550), non-coding RNA.
ILMN_2102330	NM_005202.1	COL8A2	1296	COL8A2	-1.69006	0.384579	0.114875	0.100184	1.66449e-05	0.000246001	-0.822679	0.364862	0.285083	0.270189	0.0250499	0.216741	collagen, type VIII, alpha 2 (COL8A2), mRNA.	PPCD2; FECD; MGC116972; FLJ00201; MGC116970; PPCD
ILMN_1727532	NM_020190.2	OLFML3	56944	OLFML3	-1.17421	0.267235	0.114856	0.100164	1.66903e-05	0.000246518	-0.765434	0.243867	0.298725	0.284115	0.00190923	0.0412555	olfactomedin-like 3 (OLFML3), mRNA.	OLF44; HNOEL-iso
ILMN_1790951	NM_024069.2	C19orf50	79036	C19orf50	-1.76328	0.401311	0.114852	0.100161	1.66987e-05	0.000246566	-1.00005	0.37319	0.291148	0.27638	0.00787827	0.105791	chromosome 19 open reading frame 50 (C19orf50), mRNA.	MSTP096; FLJ25480; MST096; MGC2749
ILMN_3251686	NM_152277.2	UBTD2	92181	UBTD2	-3.24692	0.739173	0.114817	0.100125	1.67817e-05	0.000247559	-1.47534	0.707264	0.282939	0.268	0.0380368	0.270839	ubiquitin domain containing 2 (UBTD2), mRNA.	MGC30022; DCUBP; DC-UbP
ILMN_3200330	XR_018287.2	LOC399988	399988	HSPA8	-0.808855	0.184196	0.114776	0.100084	1.68794e-05	0.000248922	-0.444064	0.17202	0.289662	0.274863	0.0104325	0.126318	PREDICTED: misc_RNA (LOC399988), miscRNA.
ILMN_2330845	NM_006178.1	NSF	4905	NSF	-2.30374	0.525031	0.114673	0.0999787	1.71305e-05	0.000252344	-1.01003	0.504429	0.281934	0.266974	0.0463758	0.302274	N-ethylmaleimide-sensitive factor (NSF), mRNA.	SKD2
ILMN_2319910	NM_201554.1	DGKA	1606	DGKA	-2.98652	0.680723	0.114657	0.0999624	1.71697e-05	0.000252809	-1.5625	0.639678	0.287648	0.272807	0.0153032	0.160727	diacylglycerol kinase, alpha 80kDa (DGKA), transcript variant 4, mRNA.	MGC42356; DGK-alpha; DAGK1; MGC12821; DAGK
ILMN_1670490	NM_001006625.1	PDPN	10630	PDPN	-2.00371	0.456859	0.114614	0.0999187	1.72751e-05	0.000254203	-1.18256	0.422482	0.293018	0.278289	0.00554152	0.0845422	podoplanin (PDPN), transcript variant 4, mRNA.	Gp38; OTS8; T1A; PA2.26; GP40; GP36; T1A-2; HT1A-1
ILMN_1812666	NM_013238.2	DNAJC15	29103	DNAJC15	-1.87667	0.428145	0.114537	0.0998407	1.7465e-05	0.000256519	-1.27575	0.388414	0.301343	0.286788	0.00117404	0.0297882	DnaJ (Hsp40) homolog, subfamily C, member 15 (DNAJC15), mRNA.	MCJ; DNAJD1; HSD18
ILMN_1758250	NM_006700.1	TRAFD1	10906	TRAFD1	-2.91956	0.666444	0.114464	0.0997664	1.76479e-05	0.000259044	-2.01875	0.603192	0.302492	0.28796	0.00094888	0.0256587	TRAF-type zinc finger domain containing 1 (TRAFD1), mRNA.	FLN29
ILMN_2195236	NM_006320.1	PGRMC2	10424	PGRMC2	-1.28166	0.292574	0.114459	0.0997608	1.76619e-05	0.000259088	-0.555952	0.281354	0.281625	0.266659	0.0493014	0.310971	progesterone receptor membrane component 2 (PGRMC2), mRNA.	DG6; PMBP
ILMN_1703558	NM_004468.3	FHL3	2275	FHL3	-2.18769	0.499422	0.114453	0.099755	1.76762e-05	0.000259138	-1.21862	0.465349	0.29022	0.275433	0.00938758	0.118457	four and a half LIM domains 3 (FHL3), mRNA.	MGC23614; SLIM2; MGC8696; MGC19547
ILMN_1743620	NM_002888.2	RARRES1	5918	RARRES1	-0.676725	0.154537	0.114412	0.099713	1.77805e-05	0.000260424	-0.481802	0.13932	0.304591	0.290104	0.000643133	0.0196713	retinoic acid receptor responder (tazarotene induced) 1 (RARRES1), transcript variant 2, mRNA.	TIG1
ILMN_1711383	NM_006282.2	STK4	6789	STK4	-1.30521	0.298202	0.114348	0.0996482	1.79428e-05	0.000262449	-0.572584	0.286332	0.281903	0.266943	0.0466578	0.303269	serine/threonine kinase 4 (STK4), mRNA.	DKFZp686A2068; MST1; KRS2; YSK3
ILMN_1782729	NM_172004.2	CLECL1	160365	CLECL1	-1.9299	0.440981	0.114332	0.0996321	1.79833e-05	0.000262907	-0.841301	0.423734	0.281736	0.266772	0.0482329	0.307907	C-type lectin-like 1 (CLECL1), mRNA.	DCAL1
ILMN_2344216	NM_001980.2	STX2	2054	STX2	-1.67596	0.383006	0.114315	0.0996148	1.80271e-05	0.000263433	-0.562841	0.378586	0.2766	0.26153	0.138408	0.511157	syntaxin 2 (STX2), transcript variant 1, mRNA.	MGC51014; STX2C; STX2A; EPM; STX2B; EPIM
ILMN_2243687	NM_002294.1	LAMP2	3920	LAMP2	-0.558794	0.127704	0.114311	0.0996112	1.80361e-05	0.000263433	-0.291362	0.120007	0.287439	0.272594	0.015924	0.164975	lysosomal-associated membrane protein 2 (LAMP2), transcript variant LAMP2A, mRNA.	CD107b; LAMP-2C; LAMPB
ILMN_1673649	NM_006389.2	HYOU1	10525	HYOU1	-2.05323	0.469879	0.114133	0.09943	1.85e-05	0.000269628	-0.956611	0.447762	0.283564	0.268638	0.0336565	0.253262	hypoxia up-regulated 1 (HYOU1), mRNA.	DKFZp686N08236; ORP150
ILMN_2349982	NM_033136.1	FGF1	2246	FGF1	-2.29486	0.52529	0.114105	0.0994009	1.85757e-05	0.00027048	-1.09397	0.499133	0.284264	0.269353	0.0293601	0.235403	fibroblast growth factor 1 (acidic) (FGF1), transcript variant 2, mRNA.	ECGFA; HBGF1; FGFA; ECGF-beta; ECGF; ECGFB; AFGF; FGF-alpha; GLIO703
ILMN_1693879	NM_145000.2	RANBP3L	202151	RANBP3L	-2.12131	0.485561	0.114106	0.0994021	1.85727e-05	0.00027048	-1.10251	0.456371	0.28727	0.272422	0.0164474	0.168273	RAN binding protein 3-like (RANBP3L), mRNA.	FLJ25422
ILMN_1781386	NM_017983.4	WIPI1	55062	WIPI1	-1.53981	0.352564	0.114066	0.099362	1.86773e-05	0.000271792	-0.827675	0.329914	0.288595	0.273774	0.012776	0.143182	WD repeat domain, phosphoinositide interacting 1 (WIPI1), mRNA.	WIPI49; FLJ10055; Atg18
ILMN_1729915	NM_178273.1	PILRA	29992	PILRA	-2.24969	0.515184	0.114046	0.0993416	1.87309e-05	0.000272404	-1.28539	0.478226	0.291272	0.276507	0.00769542	0.104283	paired immunoglobin-like type 2 receptor alpha (PILRA), transcript variant 3, mRNA.	FDF03
ILMN_1671891	NM_017933.3	PID1	55022	PID1	-1.46978	0.336632	0.114026	0.0993214	1.87839e-05	0.000273091	-0.897634	0.309717	0.294626	0.279931	0.00409998	0.0695951	phosphotyrosine interaction domain containing 1 (PID1), mRNA.	HMFN2073; FLJ20701; NYGGF4
ILMN_3200140	XR_040455.1	LOC645638	645638	LOC645638	-2.58083	0.591863	0.11386	0.0991522	1.92348e-05	0.000279304	-1.80722	0.534616	0.303119	0.288601	0.000844706	0.0236808	PREDICTED: misc_RNA (LOC645638), miscRNA.
ILMN_1713182	XM_936226.1	LOC653879	653879	C3	-0.758455	0.174018	0.1138	0.0990908	1.94009e-05	0.000281197	-0.395421	0.163431	0.287322	0.272474	0.0162864	0.167373	PREDICTED: similar to Complement C3 precursor (LOC653879), mRNA.
ILMN_2365711	NM_004404.3	SEPT2	4735	SEPT2	-1.68287	0.386212	0.113767	0.0990576	1.94914e-05	0.000282249	-1.07279	0.35323	0.296958	0.282312	0.00265247	0.0521172	septin 2 (SEPT2), transcript variant 4, mRNA.	KIAA0158; NEDD5; hNedd5; DIFF6; Pnutl3	D
ILMN_1653856	NM_032873.3	STS-1	84959	UBASH3B	-2.06953	0.475042	0.113741	0.0990318	1.95621e-05	0.000283186	-1.03154	0.448661	0.285672	0.27079	0.0223566	0.202012	Cbl-interacting protein Sts-1 (STS-1), mRNA.	MGC15437; KIAA1959; p70
ILMN_1797342	NM_015033.2	FNBP1	23048	FNBP1	-1.27454	0.292605	0.113721	0.0990105	1.96206e-05	0.000283946	-0.69539	0.27317	0.289132	0.274323	0.0115347	0.134498	formin binding protein 1 (FNBP1), mRNA.	FBP17; MGC126804; KIAA0554
ILMN_1711247	NM_015905.2	TRIM24	8805	TRIM24	-0.834063	0.191499	0.113709	0.0989988	1.96528e-05	0.000284325	-0.503281	0.176424	0.293881	0.27917	0.00471347	0.0756121	tripartite motif-containing 24 (TRIM24), transcript variant 1, mRNA.	PTC6; TIF1ALPHA; RNF82; TIF1A; TF1A; hTIF1; TIF1	D
ILMN_1809003	NM_001757.2	CBR1	873	CBR1	-2.86383	0.657665	0.113683	0.0989719	1.97269e-05	0.000285048	-2.00186	0.594139	0.302912	0.288389	0.000877761	0.0243183	carbonyl reductase 1 (CBR1), mRNA.	CBR; hCBR1
ILMN_2210837	NM_139286.3	CDC26	246184	CDC26	-1.87056	0.429584	0.113676	0.0989656	1.97443e-05	0.000285213	-1.16894	0.393917	0.295777	0.281106	0.00330628	0.0603036	cell division cycle 26 homolog (S. cerevisiae) (CDC26), mRNA.	C9orf17
ILMN_1692539	NM_018957.3	SH3BP1	23616	SH3BP1	-2.37873	0.546333	0.113666	0.0989553	1.9773e-05	0.000285541	-1.11387	0.519944	0.283637	0.268713	0.0331771	0.250932	SH3-domain binding protein 1 (SH3BP1), mRNA.
ILMN_1731048	NM_003263.3	TLR1	7096	TLR1	-1.7953	0.41235	0.113661	0.09895	1.97875e-05	0.000285662	-0.798775	0.394846	0.282179	0.267224	0.0441815	0.294092	toll-like receptor 1 (TLR1), mRNA.	KIAA0012; DKFZp547I0610; TIL; CD281; MGC126312; MGC104956; rsc786; DKFZp564I0682; MGC126311
ILMN_1657129	NM_003930.3	SKAP2	8935	SKAP2	-1.69298	0.388952	0.113627	0.0989152	1.98843e-05	0.000286797	-0.882599	0.365215	0.287282	0.272434	0.0164108	0.168103	src kinase associated phosphoprotein 2 (SKAP2), mRNA.	RA70; SCAP2; SAPS; MGC33304; MGC10411; SKAP55R; PRAP; SKAP-HOM
ILMN_1764380	NM_016433.3	GLTP	51228	GLTP	-1.8325	0.421137	0.113587	0.0988743	1.99988e-05	0.00028836	-1.14138	0.386313	0.295561	0.280885	0.00344274	0.0619561	glycolipid transfer protein (GLTP), mRNA.
ILMN_2051113	NM_005963.3	MYH1	4619	MYH1	-1.15259	0.264894	0.113582	0.0988694	2.00124e-05	0.00028847	-0.781181	0.240275	0.300736	0.286168	0.00131404	0.0323847	myosin, heavy chain 1, skeletal muscle, adult (MYH1), mRNA.	MyHC-2X/D; MYHa; MGC133384; MYHSA1
ILMN_1760849	NM_018092.3	NETO2	81831	NETO2	-2.72537	0.626487	0.113555	0.0988422	2.00888e-05	0.000289394	-1.99724	0.562436	0.306382	0.291932	0.000461694	0.0158113	neuropilin (NRP) and tolloid (TLL)-like 2 (NETO2), mRNA.	FLJ14724; FLJ10430; NEOT2; FLJ90456
ILMN_1701551	NM_080284.2	ABCA6	23460	ABCA6	-1.01191	0.232731	0.113488	0.0987741	2.02816e-05	0.000291815	-0.54872	0.21739	0.288818	0.274002	0.0122449	0.139305	ATP-binding cassette, sub-family A (ABC1), member 6 (ABCA6), mRNA.	FLJ43498; EST155051
ILMN_1657153	NM_005721.3	ACTR3	10096	ACTR3	-1.33808	0.307844	0.113447	0.0987329	2.0399e-05	0.000293326	-0.553839	0.297147	0.280355	0.265362	0.0635631	0.354099	ARP3 actin-related protein 3 homolog (yeast) (ACTR3), mRNA.	ARP3
ILMN_2169692	NM_002977.1	SCN9A	6335	SCN9A	-3.80225	0.875074	0.113401	0.0986858	2.0534e-05	0.000294998	-2.61844	0.79199	0.30174	0.287193	0.00109073	0.0282968	sodium channel, voltage-gated, type IX, alpha subunit (SCN9A), mRNA.	NE-NA; NENA; ETHA; Nav1.7; PN1
ILMN_2401822	NM_012280.2	FTSJ1	24140	FTSJ1	-2.40343	0.55322	0.113383	0.0986672	2.05877e-05	0.00029568	-1.14414	0.525228	0.284093	0.269178	0.0303529	0.23931	FtsJ homolog 1 (E. coli) (FTSJ1), transcript variant 1, mRNA.	JM23; TRM7; SPB1; CDLIV; MRX44; MRX9
ILMN_1700419	NM_014187.2	HSPC171	29100	TMEM208	-2.44094	0.561902	0.113371	0.0986555	2.06212e-05	0.000295981	-1.32168	0.524896	0.288729	0.27391	0.0124547	0.140883	HSPC171 protein (HSPC171), mRNA.
ILMN_1687821	NM_033201.1	C16orf45	89927	C16orf45	-1.92522	0.443235	0.113357	0.0986409	2.06636e-05	0.000296501	-0.811049	0.426912	0.280755	0.26577	0.0586579	0.339155	chromosome 16 open reading frame 45 (C16orf45), mRNA.	FLJ32618
ILMN_1698231	NM_015713.3	RRM2B	50484	RRM2B	-2.20835	0.508864	0.113244	0.0985262	2.09983e-05	0.000300846	-1.29898	0.470194	0.29244	0.277699	0.00617738	0.0906745	ribonucleotide reductase M2 B (TP53 inducible) (RRM2B), mRNA.	DKFZp686M05248; MGC102856; p53R2; MGC42116
ILMN_1656378	NM_004808.1	NMT2	9397	NMT2	-0.782679	0.180407	0.113204	0.0984853	2.11192e-05	0.000302029	-0.383041	0.170656	0.284948	0.270051	0.0257105	0.220241	N-myristoyltransferase 2 (NMT2), mRNA.
ILMN_2399036	NM_020451.2	SEPN1	57190	SEPN1	-1.60999	0.371323	0.113128	0.0984079	2.13494e-05	0.000304861	-1.07469	0.337399	0.299549	0.284956	0.00163811	0.0376082	selenoprotein N, 1 (SEPN1), transcript variant 1, mRNA.	RSS; MDRS1; FLJ24021; RSMD1; SELN
ILMN_1734276	NM_199169.1	PMEPA1	56937	PMEPA1	-0.51727	0.119353	0.113072	0.0983515	2.15187e-05	0.000307	-0.315496	0.109742	0.294243	0.279539	0.00440471	0.0725083	prostate transmembrane protein, androgen induced 1 (PMEPA1), transcript variant 2, mRNA.	STAG1; PMEPA1
ILMN_1768197	NM_005156.4	ROD1	9991	PTBP3	-1.40084	0.323242	0.113065	0.0983445	2.15396e-05	0.000307206	-0.602515	0.310451	0.281219	0.266244	0.0534567	0.325335	ROD1 regulator of differentiation 1 (S. pombe) (ROD1), mRNA.	DKFZp781I1117
ILMN_2152581	NM_007271.2	STK38	11329	STK38	-1.56955	0.362255	0.113036	0.0983144	2.16309e-05	0.000308414	-0.84239	0.338653	0.288287	0.27346	0.0135455	0.148395	serine/threonine kinase 38 (STK38), mRNA.	NDR1; NDR
ILMN_1654398	NM_015149.3	RGL1	23179	RGL1	-1.08403	0.250211	0.113028	0.0983064	2.16552e-05	0.000308575	-0.620819	0.231957	0.291097	0.276328	0.00795386	0.106457	ral guanine nucleotide dissociation stimulator-like 1 (RGL1), mRNA.	RGL; KIAA0959
ILMN_1767365	NM_002576.3	PAK1	5058	PAK1	-2.38823	0.551606	0.112943	0.09822	2.19189e-05	0.000311957	-1.58677	0.50146	0.299177	0.284576	0.00175538	0.0390678	p21/Cdc42/Rac1-activated kinase 1 (STE20 homolog, yeast) (PAK1), mRNA.	MGC130001; MGC130000; PAKalpha
ILMN_3199780	XR_038201.1	LOC401076	401076	CAP1	-1.2478	0.288375	0.112866	0.098142	2.21595e-05	0.000314812	-0.663427	0.269858	0.287872	0.273036	0.0146619	0.155966	PREDICTED: misc_RNA (LOC401076), miscRNA.
ILMN_1802646	NM_004445.2	EPHB6	2051	EPHB6	-2.87926	0.665499	0.112851	0.0981264	2.22082e-05	0.00031541	-1.7303	0.612986	0.293397	0.278676	0.00516082	0.0803939	EPH receptor B6 (EPHB6), mRNA.	MGC129910; MGC129911; HEP
ILMN_1754660	NM_153367.2	ZCCHC24	219654	ZCCHC24	-1.12702	0.260643	0.112778	0.098052	2.24406e-05	0.000318483	-0.666645	0.240558	0.292575	0.277837	0.00602176	0.0891092	zinc finger, CCHC domain containing 24 (ZCCHC24), mRNA.	FLJ90798
ILMN_1772964	NM_005623.2	CCL8	6355	CCL8	-0.529734	0.122512	0.112776	0.0980507	2.24448e-05	0.000318483	-0.372133	0.110555	0.302851	0.288327	0.000887807	0.0245114	chemokine (C-C motif) ligand 8 (CCL8), mRNA.	HC14; MCP2; SCYA10; SCYA8; MCP-2
ILMN_2342066	NM_001004431.1	METRNL	284207	METRNL	-2.22914	0.515911	0.112683	0.0979557	2.27456e-05	0.000321978	-0.836604	0.502606	0.27827	0.263234	0.0973111	0.436602	meteorin, glial cell differentiation regulator-like (METRNL), mRNA.	MGC99788
ILMN_1734950	NM_005576.2	LOXL1	4016	LOXL1	-2.69301	0.623635	0.112608	0.0978795	2.29897e-05	0.000325142	-1.46262	0.581844	0.288667	0.273848	0.0126009	0.14208	lysyl oxidase-like 1 (LOXL1), mRNA.	LOXL; LOL
ILMN_2211003	NM_174942.1	GAS2L3	283431	GAS2L3	-3.85432	0.892749	0.112582	0.097853	2.30752e-05	0.000326254	-2.28718	0.823465	0.292675	0.277939	0.00591051	0.0882082	growth arrest-specific 2 like 3 (GAS2L3), mRNA.
ILMN_1725090	NM_138455.2	CTHRC1	115908	CTHRC1	-0.557185	0.129063	0.112576	0.0978467	2.30956e-05	0.000326444	-0.174067	0.127963	0.275524	0.260431	0.175012	0.56599	collagen triple helix repeat containing 1 (CTHRC1), mRNA.
ILMN_1755462	NM_020120.2	UGCGL1	56886	UGGT1	-3.11633	0.722142	0.112524	0.0977938	2.32671e-05	0.000328672	-1.49905	0.683917	0.284266	0.269355	0.0293504	0.235403	UDP-glucose ceramide glucosyltransferase-like 1 (UGCGL1), transcript variant 1, mRNA.	FLJ23796; HUGT1; FLJ23671
ILMN_1654518	NM_002319.2	LRCH4	4034	SAP25	-1.07904	0.250151	0.112469	0.0977384	2.34484e-05	0.000330838	-0.547512	0.235351	0.286038	0.271164	0.0208328	0.193797	leucine-rich repeats and calponin homology (CH) domain containing 4 (LRCH4), mRNA.	LRRN1; PP14183; SAP25; FLJ46315; LRRN4; LRN
ILMN_1801852	NM_006808.2	SEC61B	10952	SEC61B	-1.86562	0.432674	0.112419	0.0976875	2.36162e-05	0.000332908	-0.898436	0.409656	0.284282	0.269371	0.029257	0.235229	Sec61 beta subunit (SEC61B), mRNA.
ILMN_1739008	NM_001077198.1	ATG9A	79065	ATG9A	-2.32796	0.540213	0.112345	0.0976125	2.38655e-05	0.000335821	-1.4826	0.493632	0.296385	0.281726	0.00295189	0.0558594	ATG9 autophagy related 9 homolog A (S. cerevisiae) (ATG9A), transcript variant 1, mRNA.	APG9L1; MGD3208
ILMN_1678403	NM_152390.1	TMEM178	130733	TMEM178	-1.55482	0.360825	0.112337	0.097604	2.38942e-05	0.000336125	-0.670245	0.346051	0.281174	0.266198	0.0539389	0.326433	transmembrane protein 178 (TMEM178), mRNA.	MGC33926
ILMN_1701991	NM_203446.1	SYNJ1	8867	SYNJ1	-1.95271	0.453188	0.11233	0.0975973	2.39164e-05	0.000336337	-0.79444	0.437437	0.279836	0.264832	0.0705991	0.37415	synaptojanin 1 (SYNJ1), transcript variant 2, mRNA.	INPP5G
ILMN_2148847	NM_018064.2	AKIRIN2	55122	AKIRIN2	-1.37165	0.318456	0.112282	0.0975476	2.40836e-05	0.000338185	-0.770887	0.295721	0.29004	0.27525	0.00971124	0.121151	akirin 2 (AKIRIN2), mRNA.	FLJ10342; dJ486L4.2
ILMN_1791840	NM_006788.3	RALBP1	10928	RALBP1	-1.55895	0.362159	0.112206	0.0974705	2.43449e-05	0.000341551	-0.673642	0.347162	0.281215	0.26624	0.0534995	0.325378	ralA binding protein 1 (RALBP1), mRNA.	RIP; RIP1; RLIP76
ILMN_1657862	NM_000687.1	AHCY	191	AHCY	-1.51269	0.351421	0.112202	0.0974672	2.43563e-05	0.000341609	-0.984752	0.320172	0.297623	0.282991	0.00234342	0.0479367	S-adenosylhomocysteine hydrolase (AHCY), mRNA.	SAHH
ILMN_3304072	NM_001127709.1	PRG4	10216	PRG4	-0.689301	0.160181	0.112167	0.0974307	2.44812e-05	0.00034326	-0.330786	0.151671	0.284126	0.269212	0.0301585	0.238674	proteoglycan 4 (PRG4), transcript variant C, mRNA.
ILMN_1809010	NM_002804.4	PSMC3	5702	PSMC3	-1.81672	0.422658	0.112021	0.0972829	2.49932e-05	0.000349713	-0.935031	0.396732	0.286453	0.271587	0.0192358	0.185132	proteasome (prosome, macropain) 26S subunit, ATPase, 3 (PSMC3), mRNA.	MGC8487; TBP1
ILMN_1754795	NM_005245.3	FAT1	2195	FAT1	-0.972339	0.226323	0.11196	0.0972204	2.52127e-05	0.000352576	-0.252326	0.227536	0.27366	0.258528	0.268561	0.670325	FAT tumor suppressor homolog 1 (Drosophila) (FAT1), mRNA.	ME5; hFat1; CDHF7; FAT1
ILMN_1739497	NM_207118.1	GTF2H5	404672	GTF2H5	-1.3969	0.325181	0.111945	0.0972056	2.52653e-05	0.000352998	-0.6735	0.307639	0.284232	0.26932	0.0295423	0.236329	general transcription factor IIH, polypeptide 5 (GTF2H5), mRNA.	C6orf175; TTD; TGF2H5; TTDA; TFB5; TTD-A; bA120J8.2
ILMN_1720083	NM_139265.2	EHD4	30844	EHD4	-1.37534	0.320251	0.111911	0.0971707	2.53888e-05	0.000354619	-0.379515	0.320393	0.274182	0.25906	0.237376	0.640027	EH-domain containing 4 (EHD4), mRNA.	PAST4
ILMN_1691483	NM_203339.1	CLU	1191	CLU	-3.17396	0.73964	0.111812	0.0970701	2.57492e-05	0.000359122	-1.87212	0.682298	0.292144	0.277397	0.00653086	0.093625	clusterin (CLU), transcript variant 2, mRNA.	SP-40; MGC24903; CLI; APOJ; SGP-2; TRPM-2; AAG4; TRPM2; KUB1; SGP2	D
ILMN_2280731	NM_001080510.2	C17orf95	124512	METTL23	-2.92308	0.681597	0.111734	0.096991	2.60358e-05	0.000362798	-2.04471	0.615087	0.302074	0.287534	0.00102522	0.0272551	chromosome 17 open reading frame 95 (C17orf95), mRNA.
ILMN_1709611	NM_148976.1	PSMA1	5682	PSMA1	-1.99991	0.466466	0.111699	0.0969551	2.61671e-05	0.000364199	-1.22415	0.428222	0.293979	0.27927	0.0046281	0.0747801	proteasome (prosome, macropain) subunit, alpha type, 1 (PSMA1), transcript variant 1, mRNA.	MGC22853; MGC14751; PROS30; HC2; MGC1667; MGC21459; MGC14542; MGC23915; NU; MGC14575
ILMN_2110281	NM_016406.1	UFC1	51506	UFC1	-2.32178	0.541621	0.11168	0.0969359	2.62376e-05	0.000364965	-1.8002	0.482458	0.309968	0.295592	0.000237821	0.0097045	ubiquitin-fold modifier conjugating enzyme 1 (UFC1), mRNA.	HSPC155
ILMN_1712475	NM_006043.1	HS3ST2	9956	HS3ST2	-2.13355	0.498059	0.111592	0.0968468	2.65668e-05	0.000369435	-0.99357	0.472897	0.283124	0.268189	0.0366816	0.265303	heparan sulfate (glucosamine) 3-O-sulfotransferase 2 (HS3ST2), mRNA.	3OST2; 30ST2
ILMN_1749591	NM_002209.1	ITGAL	3683	ITGAL	-1.57291	0.367247	0.11157	0.0968245	2.66501e-05	0.000370376	-0.758739	0.347238	0.284179	0.269266	0.0298514	0.237435	integrin, alpha L (antigen CD11A (p180), lymphocyte function-associated antigen 1; alpha polypeptide) (ITGAL), mRNA.	LFA1A; LFA-1; CD11A
ILMN_1671326	NM_012199.2	EIF2C1	26523	EIF2C1	-2.89201	0.67539	0.111541	0.0967948	2.6761e-05	0.00037159	-1.41499	0.637486	0.284624	0.26972	0.0273788	0.227949	eukaryotic translation initiation factor 2C, 1 (EIF2C1), mRNA.	Q99; GERP95; DKFZp686M13167; AGO1; EIF2C
ILMN_1808587	NM_006885.3	ZFHX3	463	ZFHX3	-1.25689	0.293681	0.111476	0.0967288	2.70093e-05	0.000374498	-0.550764	0.28075	0.28146	0.266491	0.0509467	0.316744	zinc finger homeobox 3 (ZFHX3), transcript variant A, mRNA.	ATBF1; ZFHX3; ATBT
ILMN_1741133	NM_000269.2	NME1	4830	NME1	-0.826434	0.193102	0.111476	0.0967287	2.701e-05	0.000374498	-0.484682	0.178207	0.291767	0.277012	0.00701038	0.0977156	non-metastatic cells 1, protein (NM23A) expressed in (NME1), transcript variant 2, mRNA.	NDPKA; NM23-H1; NDPK-A; NM23; AWD; GAAD
[truncated: 3,507 more rows]

## Sheet: S.table-2A
Supplemental Table 2A: Adipose tissue transcripts correlated with Matsuda insulin sensitivity index in AAGMEx are enriched for genes in biological pathways
[truncated: 282 more rows]

[truncated: 13 more sheets: S.table-2B, S.table-3, S.table-4, S.table-4A, S.table-4B, S. table-4C, S.table-5, S.table-6, S.table-7, S.table-8, S.table-9, S.table-10, S.table-11]
